# Supplementary material for: Machine-Learning-Based Prediction of 1-Year Arrhythmia Recurrence after Ventricular Tachycardia Ablation in Patients with Structural Heart Disease
Source: MDPI journal article supplement (doi:10.3390/bioengineering10121386), 2023-12-01
Supplement: s1 [file s1]

# Machine Learning Based Prediction of 1-year Arrhythmia Recurrence after Ventricular Tachycardia Ablation in Patients with Structural Heart Disease

## Supplement to *Materials and Methods* 2.5 – Machine learning pipeline

Table of contents:

### S1. Methods

1.a Supplementary Table S1a: Model hyperparameters for feature ranking

1.b Supplementary Table S1b: Model hyperparameters for feature group ranking

1.c Supplementary Table S1c: Final model selection using Bayesian grid search

### S2. Results

Supplementary Table S2a: Feature selection overview

Supplementary Table S2b: Feature ranking results

Supplementary Table S2c: Feature group ranking results

Supplementary Table S2d: Final model selection results

## S1. Methods

- a. **Supplementary Table S1a** Model hyperparameters for feature ranking (5-fold cross-validation)

The following tables show the hyperparameter spaces utilized for the grid search during the feature ranking. For Multilayer Perceptron (MLP), Random Forest (RF) and Extreme Gradient Boosting (XGB) classifiers the respective hyperparameters are listed (Parameter column), along with the possible values assessed by the grid search (Search space column).

i. MLP

| MLP | Parameter               | Search space                    |
|-----|-------------------------|---------------------------------|
|     | 'NN_hidden_layer_sizes' | [(5,), (10,), (10, 5), (5, 5) ] |
|     | 'NN_alpha'              | [ 1, 0.01, 0.001]               |
|     | 'NN_max_iter'           | [200]                           |
|     | 'NN_activation'         | ['identity', 'tanh', 'relu']    |
|     | 'NN_solver'             | ['adam', 'lbfgs']               |
|     | 'NN_random_state'       |                                 |

ii. RF

| RF | Parameter          | Search space         |
|----|--------------------|----------------------|
|    | 'max_depth'        | [2, 3]               |
|    | 'max_features'     | [2, 3]               |
|    | 'min_samples_leaf' | [5, 10]              |
|    | 'criterion'        | ['gini', 'log_loss'] |
|    | 'n_estimators'     | [500]                |
|    | 'random_state'     |                      |

iii. XGB

| XGB | Parameter          | Search space     |
|-----|--------------------|------------------|
|     | 'min_child_weight' | [5, 10]          |
|     | 'gamma'            | [0.5, 1, 1.5, 2] |
|     | 'subsample'        | [0.6, 0.8]       |
|     | 'colsample_bytree' | [0.6, 0.8]       |
|     | 'max_depth'        | [2, 3]           |
|     | 'random_state'     |                  |

- b. **Supplementary Table S1b:** Model hyperparameters for feature group ranking (5-fold cross-validation). The following tables show the hyperparameter spaces utilized for the grid search during the feature group ranking. For Multilayer Perceptron (MLP), Random Forest (RF) and Extreme Gradient Boosting (XGB) classifiers the respective hyperparameters are listed (Parameter column), along with the possible values assessed by the grid search (Search space column).

i. MLP

| MLP | Parameter               | Search space                                     |
|-----|-------------------------|--------------------------------------------------|
|     | 'NN_hidden_layer_sizes' | [(20,), (5, 4, 3), (5,), (10,), (10, 5), (5, 5)] |
|     | 'NN_alpha'              | [10, 1, 0.01, 0.001, 0.0001]                     |
|     | 'NN_max_iter'           | [200, 150]                                       |
|     | 'NN_activation'         | ['identity', 'logistic', 'tanh', 'relu']         |
|     | 'NN_solver'             | ['adam', 'lbfgs']                                |
|     | 'NN_random_state'       | [0]                                              |

ii. RF

| RF | Parameter          | Search space         |
|----|--------------------|----------------------|
|    | 'max_depth'        | [2, 3, 5]            |
|    | 'max_features'     | [2, 3, 5]            |
|    | 'min_samples_leaf' | [5, 10, 20]          |
|    | 'criterion'        | ['gini', 'log_loss'] |
|    | 'n_estimators'     | [100, 500, 700]      |
|    | 'random_state'     | [0, 42]              |

iii. XGB

| XGB | Parameter          | Search space        |
|-----|--------------------|---------------------|
|     | 'min_child_weight' | [1, 5, 10]          |
|     | 'gamma'            | [0.5, 1, 1.5, 2, 5] |
|     | 'subsample'        | [0.6, 0.8, 1.0]     |
|     | 'colsample_bytree' | [0.6, 0.8, 1.0]     |
|     | 'max_depth'        | [3, 4, 5]           |
|     | 'random_state'     | [0, 42]             |

- c. **Supplementary Table S1c:** Final model selection using Bayesian grid search, hyperparameter space. “Parameter” shows the name of parameter and “Search space” represents the options tested during grid search.

| MLP | Parameter                | Search space                                                    |
|-----|--------------------------|-----------------------------------------------------------------|
|     | 'NN__hidden_layer_sizes' | 20, 15, 10, 25, 9, 8, 7, 6, 5, 4, 3, 22, 24, 27, 30, 35, 40, 50 |
|     | 'NN__alpha'              | Real numbers between 0.0001 and 10, 'log-uniform' distribution  |
|     | 'NN__max_iter'           | Integers between 50 and 500                                     |
|     | 'NN__activation'         | 'identity', 'logistic', 'tanh', 'relu'                          |
|     | 'NN__solver'             | 'adam', 'lbfgs'                                                 |
|     | 'NN__random_state'       | 0                                                               |

| RF | Parameter          | Search space                                          |
|----|--------------------|-------------------------------------------------------|
|    | 'max_depth'        | Integers between 1 and 5                              |
|    | 'max_features'     | Integers between 1 and 9                              |
|    | 'min_samples_leaf' | Integers between 1 and 20, 'log-uniform' distribution |
|    | 'criterion'        | 'gini', 'log_loss'                                    |
|    | 'RF__class_weight' | 'balanced', 'balanced_subsample'                      |
|    | 'RF__random_state' | Integers between 0 and 100                            |

| XGB | Parameter          | Search space                     |
|-----|--------------------|----------------------------------|
|     | 'min_child_weight' | Real numbers between 0 and 50    |
|     | 'gamma'            | Real numbers between 0.1 and 5   |
|     | 'subsample'        | Real numbers between 0.5 and 0.7 |
|     | 'colsample_bytree' | Real numbers between 0.5 and 1   |
|     | 'max_depth'        | Integers between 1 and 3         |
|     | 'random_state'     | 0                                |
|     | 'alpha'            | Real numbers between 5 and 30    |
|     | 'Scale_pos_weight' | Real numbers between 0.5 and 2   |

## S2. Results

### d. Feature selection overview

**Supplementary Table S2a:** Feature selection overview: this table lists the 31 recorded features and shows which features were excluded at certain steps of the feature selection process, as well as the features selected for the two final classifiers.

|                                                       |                               |
|-------------------------------------------------------|-------------------------------|
| Features manually excluded                            | Male                          |
|                                                       | Hypertension                  |
|                                                       | Diabetes                      |
|                                                       | COPD                          |
|                                                       | SCD                           |
|                                                       | CAD                           |
|                                                       | ICD                           |
|                                                       | CRT                           |
|                                                       | HF                            |
|                                                       | Amiodarone                    |
|                                                       | Beta blocker                  |
|                                                       | Clinical VT inducible         |
|                                                       | Non-clinical VT inducible     |
|                                                       | Major complications           |
| Features excluded by machine learning based selection | All VTs eliminated            |
|                                                       | Atrial fibrillation           |
|                                                       | Clinical VT cycle length      |
|                                                       | NYHA status                   |
|                                                       | E wave deceleration time (DT) |
|                                                       | TR III-IV                     |
|                                                       | Electrical Storm              |
|                                                       | Age                           |
| Features used only in one-year model                  | Inducible VT morphologies     |
|                                                       | LVEDD                         |
|                                                       | MR                            |
| Features used in both models                          | HD instability                |
|                                                       | ICD shock                     |
| Features used only in one-month model                 | Incessant VT                  |
|                                                       | LVEF                          |
|                                                       | TAPSE                         |
|                                                       | Clinical VT eliminated        |

Abbreviations: COPD: chronic obstructive pulmonary disease, SCD: sudden cardiac death, CAD: coronary artery disease, ICD: implantable cardioverter defibrillator, CRT: cardiac resynchronization therapy, HF: heart failure, VT: ventricular tachycardia, NYHA: New York Heart Association, TR: tricuspid regurgitation, LVEDD: left ventricular end

systolic diameter, MR: mitral regurgitation, HD: hemodynamic, LVEF: left ventricular ejection fraction, TAPSE: tricuspid annular plane systolic excursion

- e. **Supplementary Table S2b:** Feature ranking results for 100 iterations using each approach. Through each iteration, the hyperparameters yielding the highest AUC were selected, and the resulting model was used to determine the feature ranking.

Each row represents an iteration, where

- the “iteration number (random\_state)” column shows the index of the given iteration out of the 100; this value matches the random state used for that iteration.
- the “Model” column shows the type of classifier and approach used:
  - MLP, PI: Multilayer Perceptron combined with permutation importance
  - RF, PI: Random Forest combined with permutation importance
  - XGB, PI: Extreme Gradient Boosting combined with permutation importance
  - XGB, RFE: Extreme Gradient Boosting combined with recursive feature elimination
  - AVG: the average ranks across the above four methods, for a corresponding iteration (e.g. AVG iteration 0 is derived from the average ranks across iteration 0 of MLP PI, RF PI, XGB PI and XGB RFE rankings),
- the “Parameters” column shows the selected best hyperparameters during the iteration, and
- in each consequent column gives the rank of the respective feature, as determined in that iteration.

i. 1-month VT-recurrence

| Iteration number (random_state) | Model      | Parameters                                                                                                                                | Age | Atrial fibrillation | NYHA | EF | LVESD | TAPSE | E wave deceleration time (DT) | MR | TR III-IV | ICD shock | HD instability | Incessant_VT | ES or multiple ICD therapies | Inducible VT morphologies | Clinical VT cycle length | Clinical VT eliminated |
|---------------------------------|------------|-------------------------------------------------------------------------------------------------------------------------------------------|-----|---------------------|------|----|-------|-------|-------------------------------|----|-----------|-----------|----------------|--------------|------------------------------|---------------------------|--------------------------|------------------------|
| 0                               | MLP,<br>PI | {'NN_activation': 'identity', 'NN_alpha': 1, 'NN_hidden_layer_sizes': (5,),'NN_max_iter': 200, 'NN_random_state': 0, 'NN_solver': 'adam'} | 12  | 6                   | 14   | 4  | 13    | 0     | 15                            | 7  | 16        | 5         | 1              | 2            | 11                           | 3                         | 10                       | 9                      |
| 1                               | MLP,<br>PI | {'NN_activation': 'identity', 'NN_alpha': 1, 'NN_hidden_layer_sizes': (5,),'NN_max_iter': 200, 'NN_random_state': 1, 'NN_solver': 'adam'} | 9   | 12                  | 14   | 6  | 11    | 0     | 7                             | 8  | 16        | 1         | 2              | 3            | 10                           | 5                         | 15                       | 13                     |
| 2                               | MLP,<br>PI | {'NN_activation': 'identity', 'NN_alpha': 1, 'NN_hidden_layer_sizes': (5,),'NN_max_iter': 200, 'NN_random_state': 2, 'NN_solver': 'adam'} | 15  | 10                  | 13   | 2  | 12    | 1     | 7                             | 6  | 16        | 4         | 0              | 5            | 8                            | 9                         | 11                       | 3                      |
| 3                               | MLP,<br>PI | {'NN_activation': 'identity', 'NN_alpha': 1, 'NN_hidden_layer_sizes': (5,),'NN_max_iter': 200, 'NN_random_state': 3, 'NN_solver': 'adam'} | 14  | 6                   | 12   | 7  | 10    | 2     | 16                            | 3  | 15        | 4         | 1              | 0            | 13                           | 9                         | 11                       | 5                      |
| 4                               | MLP,<br>PI | {'NN_activation': 'identity', 'NN_alpha': 1, 'NN_hidden_layer_sizes': (5,),'NN_max_iter': 200, 'NN_random_state': 4, 'NN_solver': 'adam'} | 12  | 9                   | 15   | 5  | 13    | 0     | 10                            | 6  | 16        | 8         | 1              | 7            | 2                            | 4                         | 14                       | 3                      |
| 5                               | MLP,<br>PI | {'NN_activation': 'identity', 'NN_alpha': 1, 'NN_hidden_layer_sizes': (5,),'NN_max_iter': 200, 'NN_random_state': 5, 'NN_solver': 'adam'} | 12  | 10                  | 14   | 3  | 9     | 0     | 7                             | 6  | 16        | 5         | 2              | 13           | 1                            | 8                         | 15                       | 4                      |



|    |            |                                                                                                                                                        |    |    |    |    |    |   |    |   |    |    |   |   |    |   |    |    |
|----|------------|--------------------------------------------------------------------------------------------------------------------------------------------------------|----|----|----|----|----|---|----|---|----|----|---|---|----|---|----|----|
| 6  | MLP,<br>PI | {'NN__activation': 'identity', 'NN__alpha': 1,<br>'NN__hidden_layer_sizes': (5,),'NN__max_iter': 200,<br>'NN__random_state': 6, 'NN__solver': 'adam'}  | 13 | 10 | 14 | 4  | 15 | 1 | 9  | 5 | 16 | 2  | 0 | 3 | 8  | 7 | 12 | 6  |
| 7  | MLP,<br>PI | {'NN__activation': 'identity', 'NN__alpha': 1,<br>'NN__hidden_layer_sizes': (5,),'NN__max_iter': 200,<br>'NN__random_state': 7, 'NN__solver': 'adam'}  | 12 | 6  | 10 | 7  | 14 | 1 | 13 | 8 | 16 | 9  | 2 | 3 | 0  | 5 | 15 | 4  |
| 8  | MLP,<br>PI | {'NN__activation': 'identity', 'NN__alpha': 1,<br>'NN__hidden_layer_sizes': (5,),'NN__max_iter': 200,<br>'NN__random_state': 8, 'NN__solver': 'adam'}  | 14 | 5  | 15 | 3  | 8  | 4 | 13 | 7 | 10 | 2  | 1 | 0 | 12 | 9 | 16 | 11 |
| 9  | MLP,<br>PI | {'NN__activation': 'identity', 'NN__alpha': 1,<br>'NN__hidden_layer_sizes': (5,),'NN__max_iter': 200,<br>'NN__random_state': 9, 'NN__solver': 'adam'}  | 11 | 4  | 13 | 1  | 12 | 2 | 10 | 9 | 15 | 14 | 0 | 6 | 16 | 5 | 7  | 3  |
| 10 | MLP,<br>PI | {'NN__activation': 'identity', 'NN__alpha': 1,<br>'NN__hidden_layer_sizes': (5,),'NN__max_iter': 200,<br>'NN__random_state': 10, 'NN__solver': 'adam'} | 13 | 10 | 15 | 6  | 9  | 0 | 12 | 7 | 16 | 2  | 1 | 4 | 8  | 5 | 14 | 3  |
| 11 | MLP,<br>PI | {'NN__activation': 'identity', 'NN__alpha': 1,<br>'NN__hidden_layer_sizes': (5,),'NN__max_iter': 200,<br>'NN__random_state': 11, 'NN__solver': 'adam'} | 13 | 10 | 14 | 4  | 11 | 1 | 8  | 7 | 15 | 6  | 2 | 5 | 0  | 9 | 16 | 3  |
| 12 | MLP,<br>PI | {'NN__activation': 'identity', 'NN__alpha': 1,<br>'NN__hidden_layer_sizes': (5,),'NN__max_iter': 200,<br>'NN__random_state': 12, 'NN__solver': 'adam'} | 13 | 2  | 12 | 5  | 14 | 1 | 15 | 6 | 16 | 3  | 9 | 0 | 10 | 4 | 11 | 7  |
| 13 | MLP,<br>PI | {'NN__activation': 'identity', 'NN__alpha': 1,<br>'NN__hidden_layer_sizes': (5,),'NN__max_iter': 200,<br>'NN__random_state': 13, 'NN__solver': 'adam'} | 11 | 4  | 13 | 6  | 9  | 2 | 5  | 8 | 12 | 15 | 0 | 1 | 10 | 7 | 16 | 3  |
| 14 | MLP,<br>PI | {'NN__activation': 'identity', 'NN__alpha': 1,<br>'NN__hidden_layer_sizes': (5,),'NN__max_iter': 200,<br>'NN__random_state': 14, 'NN__solver': 'adam'} | 13 | 12 | 14 | 2  | 15 | 1 | 10 | 8 | 16 | 4  | 6 | 7 | 0  | 5 | 11 | 3  |
| 15 | MLP,<br>PI | {'NN__activation': 'identity', 'NN__alpha': 1,<br>'NN__hidden_layer_sizes': (5,),'NN__max_iter': 200,<br>'NN__random_state': 15, 'NN__solver': 'adam'} | 11 | 10 | 13 | 16 | 4  | 2 | 9  | 7 | 15 | 8  | 1 | 5 | 0  | 6 | 14 | 3  |

|    |            |                                                                                                                                                        |    |    |    |    |    |   |    |   |    |   |   |    |    |   |    |   |
|----|------------|--------------------------------------------------------------------------------------------------------------------------------------------------------|----|----|----|----|----|---|----|---|----|---|---|----|----|---|----|---|
| 16 | MLP,<br>PI | {'NN__activation': 'identity', 'NN__alpha': 1,<br>'NN__hidden_layer_sizes': (5,),'NN__max_iter': 200,<br>'NN__random_state': 16, 'NN__solver': 'adam'} | 12 | 10 | 13 | 2  | 15 | 4 | 6  | 5 | 16 | 3 | 1 | 0  | 8  | 9 | 14 | 7 |
| 17 | MLP,<br>PI | {'NN__activation': 'identity', 'NN__alpha': 1,<br>'NN__hidden_layer_sizes': (5,),'NN__max_iter': 200,<br>'NN__random_state': 17, 'NN__solver': 'adam'} | 12 | 7  | 14 | 4  | 11 | 0 | 13 | 9 | 16 | 3 | 1 | 2  | 15 | 5 | 10 | 8 |
| 18 | MLP,<br>PI | {'NN__activation': 'identity', 'NN__alpha': 1,<br>'NN__hidden_layer_sizes': (5,),'NN__max_iter': 200,<br>'NN__random_state': 18, 'NN__solver': 'adam'} | 14 | 10 | 12 | 4  | 13 | 1 | 9  | 5 | 16 | 3 | 0 | 2  | 11 | 6 | 15 | 8 |
| 19 | MLP,<br>PI | {'NN__activation': 'identity', 'NN__alpha': 1,<br>'NN__hidden_layer_sizes': (5,),'NN__max_iter': 200,<br>'NN__random_state': 19, 'NN__solver': 'adam'} | 15 | 8  | 14 | 5  | 10 | 1 | 12 | 7 | 16 | 9 | 2 | 0  | 3  | 6 | 11 | 4 |
| 20 | MLP,<br>PI | {'NN__activation': 'identity', 'NN__alpha': 1,<br>'NN__hidden_layer_sizes': (5,),'NN__max_iter': 200,<br>'NN__random_state': 20, 'NN__solver': 'adam'} | 13 | 5  | 12 | 6  | 7  | 1 | 15 | 9 | 16 | 4 | 0 | 3  | 11 | 8 | 14 | 2 |
| 21 | MLP,<br>PI | {'NN__activation': 'identity', 'NN__alpha': 1,<br>'NN__hidden_layer_sizes': (5,),'NN__max_iter': 200,<br>'NN__random_state': 21, 'NN__solver': 'adam'} | 13 | 11 | 15 | 12 | 3  | 0 | 10 | 7 | 16 | 4 | 1 | 8  | 2  | 5 | 14 | 6 |
| 22 | MLP,<br>PI | {'NN__activation': 'identity', 'NN__alpha': 1,<br>'NN__hidden_layer_sizes': (5,),'NN__max_iter': 200,<br>'NN__random_state': 22, 'NN__solver': 'adam'} | 13 | 10 | 14 | 8  | 12 | 1 | 3  | 6 | 16 | 4 | 0 | 2  | 9  | 7 | 15 | 5 |
| 23 | MLP,<br>PI | {'NN__activation': 'identity', 'NN__alpha': 1,<br>'NN__hidden_layer_sizes': (5,),'NN__max_iter': 200,<br>'NN__random_state': 23, 'NN__solver': 'adam'} | 14 | 9  | 6  | 15 | 3  | 1 | 12 | 8 | 11 | 4 | 0 | 16 | 2  | 7 | 13 | 5 |
| 24 | MLP,<br>PI | {'NN__activation': 'identity', 'NN__alpha': 1,<br>'NN__hidden_layer_sizes': (5,),'NN__max_iter': 200,<br>'NN__random_state': 24, 'NN__solver': 'adam'} | 13 | 7  | 14 | 10 | 8  | 0 | 9  | 5 | 16 | 3 | 1 | 15 | 2  | 4 | 12 | 6 |
| 25 | MLP,<br>PI | {'NN__activation': 'identity', 'NN__alpha': 1,<br>'NN__hidden_layer_sizes': (5,),'NN__max_iter': 200,<br>'NN__random_state': 25, 'NN__solver': 'adam'} | 13 | 12 | 15 | 5  | 8  | 1 | 9  | 7 | 11 | 4 | 0 | 3  | 10 | 6 | 16 | 2 |

|    |            |                                                                                                                                                        |    |    |    |    |    |    |    |    |    |    |   |    |    |    |    |   |
|----|------------|--------------------------------------------------------------------------------------------------------------------------------------------------------|----|----|----|----|----|----|----|----|----|----|---|----|----|----|----|---|
| 26 | MLP,<br>PI | {'NN__activation': 'identity', 'NN__alpha': 1,<br>'NN__hidden_layer_sizes': (5,),'NN__max_iter': 200,<br>'NN__random_state': 26, 'NN__solver': 'adam'} | 15 | 4  | 12 | 3  | 5  | 1  | 6  | 10 | 14 | 16 | 0 | 7  | 8  | 9  | 11 | 2 |
| 27 | MLP,<br>PI | {'NN__activation': 'identity', 'NN__alpha': 1,<br>'NN__hidden_layer_sizes': (5,),'NN__max_iter': 200,<br>'NN__random_state': 27, 'NN__solver': 'adam'} | 11 | 5  | 12 | 2  | 10 | 4  | 8  | 9  | 14 | 6  | 1 | 3  | 13 | 7  | 15 | 0 |
| 28 | MLP,<br>PI | {'NN__activation': 'identity', 'NN__alpha': 1,<br>'NN__hidden_layer_sizes': (5,),'NN__max_iter': 200,<br>'NN__random_state': 28, 'NN__solver': 'adam'} | 14 | 8  | 16 | 3  | 15 | 10 | 11 | 2  | 13 | 0  | 1 | 7  | 4  | 5  | 12 | 6 |
| 29 | MLP,<br>PI | {'NN__activation': 'identity', 'NN__alpha': 1,<br>'NN__hidden_layer_sizes': (5,),'NN__max_iter': 200,<br>'NN__random_state': 29, 'NN__solver': 'adam'} | 11 | 10 | 15 | 4  | 12 | 0  | 9  | 5  | 16 | 3  | 2 | 14 | 1  | 7  | 13 | 6 |
| 30 | MLP,<br>PI | {'NN__activation': 'identity', 'NN__alpha': 1,<br>'NN__hidden_layer_sizes': (5,),'NN__max_iter': 200,<br>'NN__random_state': 30, 'NN__solver': 'adam'} | 11 | 4  | 15 | 1  | 10 | 2  | 9  | 7  | 16 | 5  | 0 | 12 | 6  | 8  | 14 | 3 |
| 31 | MLP,<br>PI | {'NN__activation': 'identity', 'NN__alpha': 1,<br>'NN__hidden_layer_sizes': (5,),'NN__max_iter': 200,<br>'NN__random_state': 31, 'NN__solver': 'adam'} | 12 | 5  | 15 | 10 | 11 | 1  | 7  | 6  | 16 | 3  | 2 | 0  | 9  | 13 | 14 | 4 |
| 32 | MLP,<br>PI | {'NN__activation': 'identity', 'NN__alpha': 1,<br>'NN__hidden_layer_sizes': (5,),'NN__max_iter': 200,<br>'NN__random_state': 32, 'NN__solver': 'adam'} | 11 | 10 | 14 | 5  | 9  | 2  | 6  | 8  | 16 | 3  | 1 | 0  | 13 | 7  | 15 | 4 |
| 33 | MLP,<br>PI | {'NN__activation': 'identity', 'NN__alpha': 1,<br>'NN__hidden_layer_sizes': (5,),'NN__max_iter': 200,<br>'NN__random_state': 33, 'NN__solver': 'adam'} | 16 | 7  | 14 | 9  | 10 | 1  | 6  | 8  | 13 | 4  | 0 | 11 | 2  | 5  | 15 | 3 |
| 34 | MLP,<br>PI | {'NN__activation': 'identity', 'NN__alpha': 1,<br>'NN__hidden_layer_sizes': (5,),'NN__max_iter': 200,<br>'NN__random_state': 34, 'NN__solver': 'adam'} | 15 | 12 | 11 | 6  | 14 | 2  | 4  | 3  | 16 | 5  | 0 | 10 | 1  | 8  | 13 | 7 |
| 35 | MLP,<br>PI | {'NN__activation': 'identity', 'NN__alpha': 1,<br>'NN__hidden_layer_sizes': (5,),'NN__max_iter': 200,<br>'NN__random_state': 35, 'NN__solver': 'adam'} | 12 | 11 | 13 | 8  | 10 | 1  | 7  | 5  | 16 | 3  | 2 | 14 | 0  | 6  | 15 | 4 |

|    |            |                                                                                                                                                        |    |    |    |   |    |    |    |    |    |    |   |    |    |   |    |    |
|----|------------|--------------------------------------------------------------------------------------------------------------------------------------------------------|----|----|----|---|----|----|----|----|----|----|---|----|----|---|----|----|
| 36 | MLP,<br>PI | {'NN__activation': 'identity', 'NN__alpha': 1,<br>'NN__hidden_layer_sizes': (5,),'NN__max_iter': 200,<br>'NN__random_state': 36, 'NN__solver': 'adam'} | 10 | 12 | 15 | 6 | 7  | 1  | 8  | 4  | 16 | 3  | 2 | 0  | 14 | 9 | 13 | 5  |
| 37 | MLP,<br>PI | {'NN__activation': 'identity', 'NN__alpha': 1,<br>'NN__hidden_layer_sizes': (5,),'NN__max_iter': 200,<br>'NN__random_state': 37, 'NN__solver': 'adam'} | 14 | 7  | 13 | 4 | 9  | 0  | 16 | 6  | 15 | 5  | 2 | 11 | 1  | 8 | 12 | 3  |
| 38 | MLP,<br>PI | {'NN__activation': 'identity', 'NN__alpha': 1,<br>'NN__hidden_layer_sizes': (5,),'NN__max_iter': 200,<br>'NN__random_state': 38, 'NN__solver': 'adam'} | 11 | 6  | 9  | 5 | 2  | 16 | 3  | 14 | 10 | 15 | 0 | 4  | 7  | 8 | 12 | 1  |
| 39 | MLP,<br>PI | {'NN__activation': 'identity', 'NN__alpha': 1,<br>'NN__hidden_layer_sizes': (5,),'NN__max_iter': 200,<br>'NN__random_state': 39, 'NN__solver': 'adam'} | 10 | 12 | 14 | 0 | 15 | 9  | 7  | 8  | 13 | 5  | 3 | 16 | 1  | 4 | 6  | 2  |
| 40 | MLP,<br>PI | {'NN__activation': 'identity', 'NN__alpha': 1,<br>'NN__hidden_layer_sizes': (5,),'NN__max_iter': 200,<br>'NN__random_state': 40, 'NN__solver': 'adam'} | 12 | 15 | 14 | 5 | 7  | 4  | 8  | 11 | 13 | 3  | 0 | 6  | 2  | 9 | 10 | 16 |
| 41 | MLP,<br>PI | {'NN__activation': 'identity', 'NN__alpha': 1,<br>'NN__hidden_layer_sizes': (5,),'NN__max_iter': 200,<br>'NN__random_state': 41, 'NN__solver': 'adam'} | 15 | 6  | 12 | 4 | 13 | 2  | 7  | 11 | 14 | 3  | 0 | 1  | 16 | 5 | 10 | 8  |
| 42 | MLP,<br>PI | {'NN__activation': 'identity', 'NN__alpha': 1,<br>'NN__hidden_layer_sizes': (5,),'NN__max_iter': 200,<br>'NN__random_state': 42, 'NN__solver': 'adam'} | 13 | 7  | 12 | 3 | 14 | 1  | 6  | 16 | 15 | 9  | 2 | 8  | 0  | 4 | 10 | 5  |
| 43 | MLP,<br>PI | {'NN__activation': 'identity', 'NN__alpha': 1,<br>'NN__hidden_layer_sizes': (5,),'NN__max_iter': 200,<br>'NN__random_state': 43, 'NN__solver': 'adam'} | 10 | 9  | 14 | 3 | 7  | 1  | 15 | 6  | 16 | 5  | 0 | 2  | 13 | 8 | 11 | 4  |
| 44 | MLP,<br>PI | {'NN__activation': 'identity', 'NN__alpha': 1,<br>'NN__hidden_layer_sizes': (5,),'NN__max_iter': 200,<br>'NN__random_state': 44, 'NN__solver': 'adam'} | 14 | 10 | 15 | 9 | 12 | 2  | 4  | 3  | 13 | 1  | 0 | 8  | 11 | 5 | 16 | 6  |
| 45 | MLP,<br>PI | {'NN__activation': 'identity', 'NN__alpha': 1,<br>'NN__hidden_layer_sizes': (5,),'NN__max_iter': 200,<br>'NN__random_state': 45, 'NN__solver': 'adam'} | 12 | 8  | 14 | 5 | 9  | 1  | 10 | 7  | 16 | 2  | 0 | 15 | 4  | 6 | 13 | 3  |

|    |            |                                                                                                                                                         |    |    |    |    |    |   |    |    |    |   |    |    |    |   |    |    |
|----|------------|---------------------------------------------------------------------------------------------------------------------------------------------------------|----|----|----|----|----|---|----|----|----|---|----|----|----|---|----|----|
| 46 | MLP,<br>PI | {'NN__activation': 'identity', 'NN__alpha': 1,<br>'NN__hidden_layer_sizes': (5,), 'NN__max_iter': 200,<br>'NN__random_state': 46, 'NN__solver': 'adam'} | 13 | 9  | 14 | 10 | 8  | 1 | 7  | 12 | 16 | 2 | 0  | 6  | 4  | 5 | 15 | 3  |
| 47 | MLP,<br>PI | {'NN__activation': 'identity', 'NN__alpha': 1,<br>'NN__hidden_layer_sizes': (5,), 'NN__max_iter': 200,<br>'NN__random_state': 47, 'NN__solver': 'adam'} | 14 | 11 | 15 | 4  | 12 | 1 | 8  | 7  | 16 | 2 | 0  | 10 | 3  | 9 | 13 | 5  |
| 48 | MLP,<br>PI | {'NN__activation': 'identity', 'NN__alpha': 1,<br>'NN__hidden_layer_sizes': (5,), 'NN__max_iter': 200,<br>'NN__random_state': 48, 'NN__solver': 'adam'} | 11 | 9  | 16 | 5  | 13 | 1 | 7  | 6  | 14 | 2 | 0  | 10 | 8  | 4 | 15 | 3  |
| 49 | MLP,<br>PI | {'NN__activation': 'identity', 'NN__alpha': 1,<br>'NN__hidden_layer_sizes': (5,), 'NN__max_iter': 200,<br>'NN__random_state': 49, 'NN__solver': 'adam'} | 12 | 8  | 13 | 5  | 11 | 1 | 16 | 6  | 15 | 4 | 2  | 9  | 0  | 3 | 14 | 7  |
| 50 | MLP,<br>PI | {'NN__activation': 'identity', 'NN__alpha': 1,<br>'NN__hidden_layer_sizes': (5,), 'NN__max_iter': 200,<br>'NN__random_state': 50, 'NN__solver': 'adam'} | 14 | 10 | 11 | 3  | 15 | 1 | 9  | 5  | 16 | 2 | 0  | 4  | 12 | 7 | 13 | 6  |
| 51 | MLP,<br>PI | {'NN__activation': 'identity', 'NN__alpha': 1,<br>'NN__hidden_layer_sizes': (5,), 'NN__max_iter': 200,<br>'NN__random_state': 51, 'NN__solver': 'adam'} | 14 | 10 | 13 | 3  | 12 | 0 | 11 | 5  | 15 | 1 | 16 | 2  | 9  | 6 | 7  | 4  |
| 52 | MLP,<br>PI | {'NN__activation': 'identity', 'NN__alpha': 1,<br>'NN__hidden_layer_sizes': (5,), 'NN__max_iter': 200,<br>'NN__random_state': 52, 'NN__solver': 'adam'} | 14 | 8  | 13 | 3  | 12 | 1 | 10 | 7  | 16 | 5 | 0  | 15 | 2  | 6 | 11 | 4  |
| 53 | MLP,<br>PI | {'NN__activation': 'identity', 'NN__alpha': 1,<br>'NN__hidden_layer_sizes': (5,), 'NN__max_iter': 200,<br>'NN__random_state': 53, 'NN__solver': 'adam'} | 13 | 7  | 11 | 10 | 12 | 1 | 9  | 5  | 14 | 4 | 0  | 3  | 16 | 6 | 15 | 2  |
| 54 | MLP,<br>PI | {'NN__activation': 'identity', 'NN__alpha': 1,<br>'NN__hidden_layer_sizes': (5,), 'NN__max_iter': 200,<br>'NN__random_state': 54, 'NN__solver': 'adam'} | 13 | 9  | 12 | 5  | 15 | 1 | 14 | 6  | 16 | 8 | 2  | 3  | 0  | 4 | 11 | 7  |
| 55 | MLP,<br>PI | {'NN__activation': 'identity', 'NN__alpha': 1,<br>'NN__hidden_layer_sizes': (5,), 'NN__max_iter': 200,<br>'NN__random_state': 55, 'NN__solver': 'adam'} | 12 | 11 | 13 | 9  | 5  | 2 | 8  | 7  | 14 | 3 | 1  | 10 | 0  | 6 | 15 | 16 |

|    |            |                                                                                                                                                        |    |    |    |    |    |    |    |    |    |    |   |    |    |    |    |   |
|----|------------|--------------------------------------------------------------------------------------------------------------------------------------------------------|----|----|----|----|----|----|----|----|----|----|---|----|----|----|----|---|
| 56 | MLP,<br>PI | {'NN__activation': 'identity', 'NN__alpha': 1,<br>'NN__hidden_layer_sizes': (5,),'NN__max_iter': 200,<br>'NN__random_state': 56, 'NN__solver': 'adam'} | 13 | 7  | 12 | 4  | 11 | 3  | 8  | 6  | 15 | 14 | 0 | 9  | 1  | 5  | 10 | 2 |
| 57 | MLP,<br>PI | {'NN__activation': 'identity', 'NN__alpha': 1,<br>'NN__hidden_layer_sizes': (5,),'NN__max_iter': 200,<br>'NN__random_state': 57, 'NN__solver': 'adam'} | 14 | 10 | 13 | 8  | 9  | 2  | 6  | 5  | 16 | 4  | 0 | 15 | 1  | 7  | 11 | 3 |
| 58 | MLP,<br>PI | {'NN__activation': 'identity', 'NN__alpha': 1,<br>'NN__hidden_layer_sizes': (5,),'NN__max_iter': 200,<br>'NN__random_state': 58, 'NN__solver': 'adam'} | 10 | 9  | 12 | 5  | 13 | 1  | 8  | 6  | 16 | 7  | 0 | 15 | 2  | 4  | 14 | 3 |
| 59 | MLP,<br>PI | {'NN__activation': 'identity', 'NN__alpha': 1,<br>'NN__hidden_layer_sizes': (5,),'NN__max_iter': 200,<br>'NN__random_state': 59, 'NN__solver': 'adam'} | 14 | 9  | 11 | 10 | 4  | 2  | 6  | 5  | 13 | 7  | 1 | 16 | 0  | 8  | 15 | 3 |
| 60 | MLP,<br>PI | {'NN__activation': 'identity', 'NN__alpha': 1,<br>'NN__hidden_layer_sizes': (5,),'NN__max_iter': 200,<br>'NN__random_state': 60, 'NN__solver': 'adam'} | 12 | 8  | 14 | 6  | 9  | 1  | 7  | 4  | 15 | 3  | 0 | 2  | 13 | 10 | 16 | 5 |
| 61 | MLP,<br>PI | {'NN__activation': 'identity', 'NN__alpha': 1,<br>'NN__hidden_layer_sizes': (5,),'NN__max_iter': 200,<br>'NN__random_state': 61, 'NN__solver': 'adam'} | 13 | 9  | 15 | 2  | 14 | 1  | 8  | 7  | 16 | 3  | 5 | 10 | 0  | 4  | 12 | 6 |
| 62 | MLP,<br>PI | {'NN__activation': 'identity', 'NN__alpha': 1,<br>'NN__hidden_layer_sizes': (5,),'NN__max_iter': 200,<br>'NN__random_state': 62, 'NN__solver': 'adam'} | 9  | 12 | 13 | 16 | 2  | 1  | 5  | 10 | 15 | 3  | 0 | 4  | 7  | 8  | 14 | 6 |
| 63 | MLP,<br>PI | {'NN__activation': 'identity', 'NN__alpha': 1,<br>'NN__hidden_layer_sizes': (5,),'NN__max_iter': 200,<br>'NN__random_state': 63, 'NN__solver': 'adam'} | 13 | 4  | 15 | 1  | 11 | 14 | 16 | 5  | 9  | 7  | 2 | 6  | 0  | 8  | 12 | 3 |
| 64 | MLP,<br>PI | {'NN__activation': 'identity', 'NN__alpha': 1,<br>'NN__hidden_layer_sizes': (5,),'NN__max_iter': 200,<br>'NN__random_state': 64, 'NN__solver': 'adam'} | 14 | 8  | 12 | 1  | 16 | 2  | 7  | 6  | 15 | 5  | 0 | 3  | 13 | 9  | 11 | 4 |
| 65 | MLP,<br>PI | {'NN__activation': 'identity', 'NN__alpha': 1,<br>'NN__hidden_layer_sizes': (5,),'NN__max_iter': 200,<br>'NN__random_state': 65, 'NN__solver': 'adam'} | 11 | 6  | 16 | 4  | 9  | 14 | 3  | 5  | 12 | 1  | 0 | 2  | 10 | 7  | 13 | 8 |

|    |            |                                                                                                                                                        |    |    |    |    |    |   |    |    |    |   |    |    |    |    |    |    |
|----|------------|--------------------------------------------------------------------------------------------------------------------------------------------------------|----|----|----|----|----|---|----|----|----|---|----|----|----|----|----|----|
| 66 | MLP,<br>PI | {'NN__activation': 'identity', 'NN__alpha': 1,<br>'NN__hidden_layer_sizes': (5,),'NN__max_iter': 200,<br>'NN__random_state': 66, 'NN__solver': 'adam'} | 9  | 8  | 13 | 10 | 4  | 2 | 11 | 6  | 15 | 1 | 16 | 14 | 0  | 5  | 12 | 7  |
| 67 | MLP,<br>PI | {'NN__activation': 'identity', 'NN__alpha': 1,<br>'NN__hidden_layer_sizes': (5,),'NN__max_iter': 200,<br>'NN__random_state': 67, 'NN__solver': 'adam'} | 12 | 9  | 15 | 4  | 13 | 1 | 10 | 6  | 16 | 2 | 3  | 14 | 0  | 7  | 11 | 8  |
| 68 | MLP,<br>PI | {'NN__activation': 'identity', 'NN__alpha': 1,<br>'NN__hidden_layer_sizes': (5,),'NN__max_iter': 200,<br>'NN__random_state': 68, 'NN__solver': 'adam'} | 14 | 9  | 15 | 3  | 13 | 1 | 8  | 7  | 16 | 2 | 0  | 5  | 10 | 6  | 12 | 4  |
| 69 | MLP,<br>PI | {'NN__activation': 'identity', 'NN__alpha': 1,<br>'NN__hidden_layer_sizes': (5,),'NN__max_iter': 200,<br>'NN__random_state': 69, 'NN__solver': 'adam'} | 10 | 12 | 14 | 2  | 9  | 1 | 5  | 4  | 16 | 6 | 0  | 3  | 11 | 8  | 15 | 7  |
| 70 | MLP,<br>PI | {'NN__activation': 'identity', 'NN__alpha': 1,<br>'NN__hidden_layer_sizes': (5,),'NN__max_iter': 200,<br>'NN__random_state': 70, 'NN__solver': 'adam'} | 12 | 9  | 11 | 3  | 14 | 1 | 7  | 6  | 16 | 4 | 2  | 0  | 15 | 8  | 13 | 5  |
| 71 | MLP,<br>PI | {'NN__activation': 'identity', 'NN__alpha': 1,<br>'NN__hidden_layer_sizes': (5,),'NN__max_iter': 200,<br>'NN__random_state': 71, 'NN__solver': 'adam'} | 12 | 7  | 15 | 16 | 1  | 5 | 3  | 11 | 10 | 6 | 2  | 0  | 9  | 8  | 13 | 4  |
| 72 | MLP,<br>PI | {'NN__activation': 'identity', 'NN__alpha': 1,<br>'NN__hidden_layer_sizes': (5,),'NN__max_iter': 200,<br>'NN__random_state': 72, 'NN__solver': 'adam'} | 12 | 10 | 14 | 11 | 5  | 0 | 9  | 8  | 16 | 3 | 1  | 13 | 2  | 4  | 15 | 6  |
| 73 | MLP,<br>PI | {'NN__activation': 'identity', 'NN__alpha': 1,<br>'NN__hidden_layer_sizes': (5,),'NN__max_iter': 200,<br>'NN__random_state': 73, 'NN__solver': 'adam'} | 11 | 6  | 15 | 2  | 14 | 7 | 10 | 9  | 12 | 3 | 1  | 0  | 4  | 8  | 13 | 16 |
| 74 | MLP,<br>PI | {'NN__activation': 'identity', 'NN__alpha': 1,<br>'NN__hidden_layer_sizes': (5,),'NN__max_iter': 200,<br>'NN__random_state': 74, 'NN__solver': 'adam'} | 13 | 11 | 14 | 7  | 5  | 4 | 8  | 9  | 12 | 2 | 1  | 0  | 3  | 10 | 16 | 15 |
| 75 | MLP,<br>PI | {'NN__activation': 'identity', 'NN__alpha': 1,<br>'NN__hidden_layer_sizes': (5,),'NN__max_iter': 200,<br>'NN__random_state': 75, 'NN__solver': 'adam'} | 14 | 10 | 12 | 4  | 3  | 1 | 7  | 16 | 13 | 2 | 0  | 8  | 11 | 6  | 15 | 5  |

|    |            |                                                                                                                                                        |    |    |    |    |    |   |    |   |    |    |    |    |    |    |    |    |
|----|------------|--------------------------------------------------------------------------------------------------------------------------------------------------------|----|----|----|----|----|---|----|---|----|----|----|----|----|----|----|----|
| 76 | MLP,<br>PI | {'NN__activation': 'identity', 'NN__alpha': 1,<br>'NN__hidden_layer_sizes': (5,),'NN__max_iter': 200,<br>'NN__random_state': 76, 'NN__solver': 'adam'} | 12 | 13 | 15 | 4  | 7  | 1 | 11 | 6 | 10 | 3  | 0  | 2  | 14 | 8  | 9  | 16 |
| 77 | MLP,<br>PI | {'NN__activation': 'identity', 'NN__alpha': 1,<br>'NN__hidden_layer_sizes': (5,),'NN__max_iter': 200,<br>'NN__random_state': 77, 'NN__solver': 'adam'} | 15 | 4  | 11 | 3  | 12 | 2 | 6  | 9 | 13 | 5  | 14 | 1  | 16 | 10 | 8  | 0  |
| 78 | MLP,<br>PI | {'NN__activation': 'identity', 'NN__alpha': 1,<br>'NN__hidden_layer_sizes': (5,),'NN__max_iter': 200,<br>'NN__random_state': 78, 'NN__solver': 'adam'} | 15 | 7  | 12 | 3  | 13 | 0 | 11 | 9 | 16 | 2  | 1  | 4  | 14 | 8  | 10 | 6  |
| 79 | MLP,<br>PI | {'NN__activation': 'identity', 'NN__alpha': 1,<br>'NN__hidden_layer_sizes': (5,),'NN__max_iter': 200,<br>'NN__random_state': 79, 'NN__solver': 'adam'} | 14 | 10 | 15 | 12 | 8  | 2 | 9  | 7 | 16 | 3  | 1  | 5  | 0  | 6  | 13 | 4  |
| 80 | MLP,<br>PI | {'NN__activation': 'identity', 'NN__alpha': 1,<br>'NN__hidden_layer_sizes': (5,),'NN__max_iter': 200,<br>'NN__random_state': 80, 'NN__solver': 'adam'} | 12 | 6  | 11 | 5  | 14 | 1 | 8  | 3 | 16 | 4  | 0  | 7  | 13 | 9  | 15 | 2  |
| 81 | MLP,<br>PI | {'NN__activation': 'identity', 'NN__alpha': 1,<br>'NN__hidden_layer_sizes': (5,),'NN__max_iter': 200,<br>'NN__random_state': 81, 'NN__solver': 'adam'} | 12 | 5  | 13 | 1  | 16 | 0 | 10 | 7 | 15 | 2  | 11 | 8  | 3  | 6  | 14 | 4  |
| 82 | MLP,<br>PI | {'NN__activation': 'identity', 'NN__alpha': 1,<br>'NN__hidden_layer_sizes': (5,),'NN__max_iter': 200,<br>'NN__random_state': 82, 'NN__solver': 'adam'} | 12 | 5  | 13 | 4  | 14 | 1 | 16 | 8 | 15 | 10 | 0  | 7  | 2  | 6  | 9  | 3  |
| 83 | MLP,<br>PI | {'NN__activation': 'identity', 'NN__alpha': 1,<br>'NN__hidden_layer_sizes': (5,),'NN__max_iter': 200,<br>'NN__random_state': 83, 'NN__solver': 'adam'} | 15 | 10 | 9  | 0  | 7  | 3 | 11 | 5 | 16 | 2  | 1  | 13 | 4  | 12 | 14 | 6  |
| 84 | MLP,<br>PI | {'NN__activation': 'identity', 'NN__alpha': 1,<br>'NN__hidden_layer_sizes': (5,),'NN__max_iter': 200,<br>'NN__random_state': 84, 'NN__solver': 'adam'} | 14 | 9  | 13 | 4  | 15 | 2 | 10 | 5 | 16 | 3  | 0  | 1  | 11 | 6  | 12 | 8  |
| 85 | MLP,<br>PI | {'NN__activation': 'identity', 'NN__alpha': 1,<br>'NN__hidden_layer_sizes': (5,),'NN__max_iter': 200,<br>'NN__random_state': 85, 'NN__solver': 'adam'} | 11 | 7  | 13 | 8  | 12 | 1 | 9  | 5 | 16 | 2  | 0  | 10 | 6  | 4  | 15 | 3  |



|    |            |                                                                                                                                                        |    |    |    |    |    |   |    |    |    |   |   |    |    |    |    |   |  |
|----|------------|--------------------------------------------------------------------------------------------------------------------------------------------------------|----|----|----|----|----|---|----|----|----|---|---|----|----|----|----|---|--|
| 86 | MLP,<br>PI | {'NN__activation': 'identity', 'NN__alpha': 1,<br>'NN__hidden_layer_sizes': (5,),'NN__max_iter': 200,<br>'NN__random_state': 86, 'NN__solver': 'adam'} | 12 | 7  | 14 | 4  | 13 | 1 | 9  | 6  | 16 | 2 | 0 | 8  | 10 | 5  | 15 | 3 |  |
| 87 | MLP,<br>PI | {'NN__activation': 'identity', 'NN__alpha': 1,<br>'NN__hidden_layer_sizes': (5,),'NN__max_iter': 200,<br>'NN__random_state': 87, 'NN__solver': 'adam'} | 14 | 9  | 13 | 12 | 8  | 0 | 6  | 7  | 16 | 2 | 1 | 4  | 10 | 5  | 15 | 3 |  |
| 88 | MLP,<br>PI | {'NN__activation': 'identity', 'NN__alpha': 1,<br>'NN__hidden_layer_sizes': (5,),'NN__max_iter': 200,<br>'NN__random_state': 88, 'NN__solver': 'adam'} | 12 | 7  | 15 | 3  | 14 | 1 | 9  | 6  | 13 | 5 | 0 | 11 | 4  | 8  | 10 | 2 |  |
| 89 | MLP,<br>PI | {'NN__activation': 'identity', 'NN__alpha': 1,<br>'NN__hidden_layer_sizes': (5,),'NN__max_iter': 200,<br>'NN__random_state': 89, 'NN__solver': 'adam'} | 12 | 10 | 15 | 3  | 11 | 1 | 5  | 7  | 16 | 4 | 2 | 13 | 0  | 8  | 14 | 6 |  |
| 90 | MLP,<br>PI | {'NN__activation': 'identity', 'NN__alpha': 1,<br>'NN__hidden_layer_sizes': (5,),'NN__max_iter': 200,<br>'NN__random_state': 90, 'NN__solver': 'adam'} | 12 | 10 | 13 | 6  | 9  | 2 | 8  | 7  | 15 | 3 | 1 | 0  | 4  | 16 | 14 | 5 |  |
| 91 | MLP,<br>PI | {'NN__activation': 'identity', 'NN__alpha': 1,<br>'NN__hidden_layer_sizes': (5,),'NN__max_iter': 200,<br>'NN__random_state': 91, 'NN__solver': 'adam'} | 9  | 3  | 13 | 5  | 11 | 2 | 7  | 16 | 12 | 4 | 0 | 1  | 14 | 10 | 15 | 6 |  |
| 92 | MLP,<br>PI | {'NN__activation': 'identity', 'NN__alpha': 1,<br>'NN__hidden_layer_sizes': (5,),'NN__max_iter': 200,<br>'NN__random_state': 92, 'NN__solver': 'adam'} | 13 | 9  | 15 | 4  | 11 | 2 | 8  | 5  | 16 | 3 | 0 | 1  | 14 | 6  | 12 | 7 |  |
| 93 | MLP,<br>PI | {'NN__activation': 'identity', 'NN__alpha': 1,<br>'NN__hidden_layer_sizes': (5,),'NN__max_iter': 200,<br>'NN__random_state': 93, 'NN__solver': 'adam'} | 15 | 9  | 11 | 2  | 12 | 1 | 8  | 6  | 13 | 4 | 0 | 5  | 10 | 7  | 14 | 3 |  |
| 94 | MLP,<br>PI | {'NN__activation': 'identity', 'NN__alpha': 1,<br>'NN__hidden_layer_sizes': (5,),'NN__max_iter': 200,<br>'NN__random_state': 94, 'NN__solver': 'adam'} | 6  | 9  | 15 | 0  | 14 | 2 | 10 | 16 | 13 | 4 | 1 | 8  | 7  | 3  | 12 | 5 |  |
| 95 | MLP,<br>PI | {'NN__activation': 'identity', 'NN__alpha': 1,<br>'NN__hidden_layer_sizes': (5,),'NN__max_iter': 200,<br>'NN__random_state': 95, 'NN__solver': 'adam'} | 13 | 8  | 14 | 4  | 15 | 1 | 10 | 5  | 16 | 9 | 2 | 7  | 0  | 6  | 12 | 3 |  |

|    |            |                                                                                                                                                  |    |    |    |    |    |    |    |    |    |    |   |    |    |    |    |   |
|----|------------|--------------------------------------------------------------------------------------------------------------------------------------------------|----|----|----|----|----|----|----|----|----|----|---|----|----|----|----|---|
| 96 | MLP,<br>PI | {'NN_activation': 'identity', 'NN_alpha': 1,<br>'NN_hidden_layer_sizes': (5,),'NN_max_iter': 200,<br>'NN_random_state': 96, 'NN_solver': 'adam'} | 10 | 11 | 12 | 16 | 2  | 3  | 5  | 9  | 13 | 4  | 0 | 1  | 15 | 6  | 14 | 8 |
| 97 | MLP,<br>PI | {'NN_activation': 'identity', 'NN_alpha': 1,<br>'NN_hidden_layer_sizes': (5,),'NN_max_iter': 200,<br>'NN_random_state': 97, 'NN_solver': 'adam'} | 15 | 7  | 10 | 9  | 14 | 1  | 0  | 6  | 16 | 5  | 2 | 12 | 3  | 4  | 13 | 8 |
| 98 | MLP,<br>PI | {'NN_activation': 'identity', 'NN_alpha': 1,<br>'NN_hidden_layer_sizes': (5,),'NN_max_iter': 200,<br>'NN_random_state': 98, 'NN_solver': 'adam'} | 13 | 5  | 10 | 1  | 14 | 15 | 4  | 6  | 16 | 7  | 0 | 12 | 3  | 8  | 11 | 2 |
| 99 | MLP,<br>PI | {'NN_activation': 'identity', 'NN_alpha': 1,<br>'NN_hidden_layer_sizes': (5,),'NN_max_iter': 200,<br>'NN_random_state': 99, 'NN_solver': 'adam'} | 12 | 5  | 15 | 2  | 16 | 3  | 10 | 13 | 11 | 4  | 1 | 0  | 7  | 9  | 14 | 6 |
| 0  | RF,<br>PI  | {'criterion': 'gini', 'max_depth': 2, 'max_features': 2,<br>'min_samples_leaf': 5, 'n_estimators': 500, 'n_jobs': -1,<br>'random_state': 0}      | 8  | 16 | 12 | 2  | 1  | 3  | 5  | 4  | 10 | 9  | 0 | 14 | 13 | 11 | 6  | 7 |
| 1  | RF,<br>PI  | {'criterion': 'gini', 'max_depth': 2, 'max_features': 2,<br>'min_samples_leaf': 5, 'n_estimators': 500, 'n_jobs': -1,<br>'random_state': 1}      | 8  | 16 | 13 | 1  | 0  | 3  | 12 | 7  | 14 | 4  | 2 | 11 | 10 | 9  | 6  | 5 |
| 2  | RF,<br>PI  | {'criterion': 'gini', 'max_depth': 2, 'max_features': 2,<br>'min_samples_leaf': 5, 'n_estimators': 500, 'n_jobs': -1,<br>'random_state': 2}      | 4  | 14 | 13 | 1  | 2  | 3  | 11 | 10 | 9  | 8  | 0 | 16 | 7  | 12 | 5  | 6 |
| 3  | RF,<br>PI  | {'criterion': 'gini', 'max_depth': 2, 'max_features': 2,<br>'min_samples_leaf': 5, 'n_estimators': 500, 'n_jobs': -1,<br>'random_state': 3}      | 5  | 16 | 15 | 2  | 1  | 3  | 11 | 6  | 12 | 8  | 0 | 10 | 9  | 13 | 7  | 4 |
| 4  | RF,<br>PI  | {'criterion': 'gini', 'max_depth': 2, 'max_features': 2,<br>'min_samples_leaf': 5, 'n_estimators': 500, 'n_jobs': -1,<br>'random_state': 4}      | 5  | 16 | 15 | 2  | 0  | 3  | 12 | 7  | 10 | 13 | 1 | 8  | 9  | 11 | 6  | 4 |
| 5  | RF,<br>PI  | {'criterion': 'gini', 'max_depth': 2, 'max_features': 2,<br>'min_samples_leaf': 5, 'n_estimators': 500, 'n_jobs': -1,<br>'random_state': 5}      | 4  | 14 | 15 | 2  | 1  | 3  | 12 | 9  | 11 | 10 | 0 | 13 | 6  | 8  | 5  | 7 |

|    |           |                                                                                                                                              |   |    |    |   |   |   |    |    |    |    |   |    |    |    |   |   |
|----|-----------|----------------------------------------------------------------------------------------------------------------------------------------------|---|----|----|---|---|---|----|----|----|----|---|----|----|----|---|---|
| 6  | RF,<br>PI | {'criterion': 'gini', 'max_depth': 2, 'max_features': 2,<br>'min_samples_leaf': 5, 'n_estimators': 500, 'n_jobs': -1,<br>'random_state': 6}  | 5 | 16 | 15 | 3 | 1 | 2 | 13 | 12 | 11 | 6  | 0 | 10 | 7  | 9  | 4 | 8 |
| 7  | RF,<br>PI | {'criterion': 'gini', 'max_depth': 2, 'max_features': 2,<br>'min_samples_leaf': 5, 'n_estimators': 500, 'n_jobs': -1,<br>'random_state': 7}  | 3 | 13 | 11 | 2 | 0 | 5 | 15 | 8  | 9  | 6  | 1 | 16 | 14 | 10 | 7 | 4 |
| 8  | RF,<br>PI | {'criterion': 'gini', 'max_depth': 2, 'max_features': 2,<br>'min_samples_leaf': 5, 'n_estimators': 500, 'n_jobs': -1,<br>'random_state': 8}  | 6 | 16 | 10 | 2 | 0 | 3 | 13 | 8  | 9  | 11 | 1 | 15 | 4  | 12 | 7 | 5 |
| 9  | RF,<br>PI | {'criterion': 'gini', 'max_depth': 2, 'max_features': 2,<br>'min_samples_leaf': 5, 'n_estimators': 500, 'n_jobs': -1,<br>'random_state': 9}  | 6 | 13 | 11 | 2 | 1 | 3 | 14 | 7  | 9  | 8  | 0 | 15 | 16 | 10 | 4 | 5 |
| 10 | RF,<br>PI | {'criterion': 'gini', 'max_depth': 2, 'max_features': 2,<br>'min_samples_leaf': 5, 'n_estimators': 500, 'n_jobs': -1,<br>'random_state': 10} | 6 | 13 | 12 | 3 | 2 | 1 | 15 | 8  | 11 | 7  | 0 | 16 | 14 | 9  | 4 | 5 |
| 11 | RF,<br>PI | {'criterion': 'gini', 'max_depth': 2, 'max_features': 2,<br>'min_samples_leaf': 5, 'n_estimators': 500, 'n_jobs': -1,<br>'random_state': 11} | 8 | 16 | 13 | 2 | 0 | 3 | 9  | 5  | 11 | 6  | 1 | 14 | 10 | 12 | 7 | 4 |
| 12 | RF,<br>PI | {'criterion': 'gini', 'max_depth': 2, 'max_features': 2,<br>'min_samples_leaf': 5, 'n_estimators': 500, 'n_jobs': -1,<br>'random_state': 12} | 4 | 16 | 13 | 3 | 1 | 2 | 15 | 8  | 11 | 14 | 0 | 6  | 7  | 10 | 5 | 9 |
| 13 | RF,<br>PI | {'criterion': 'gini', 'max_depth': 2, 'max_features': 2,<br>'min_samples_leaf': 5, 'n_estimators': 500, 'n_jobs': -1,<br>'random_state': 13} | 5 | 15 | 13 | 2 | 1 | 3 | 12 | 9  | 11 | 6  | 0 | 16 | 7  | 10 | 8 | 4 |
| 14 | RF,<br>PI | {'criterion': 'gini', 'max_depth': 2, 'max_features': 2,<br>'min_samples_leaf': 5, 'n_estimators': 500, 'n_jobs': -1,<br>'random_state': 14} | 4 | 16 | 14 | 2 | 1 | 3 | 15 | 8  | 13 | 6  | 0 | 10 | 11 | 9  | 7 | 5 |
| 15 | RF,<br>PI | {'criterion': 'gini', 'max_depth': 2, 'max_features': 2,<br>'min_samples_leaf': 5, 'n_estimators': 500, 'n_jobs': -1,<br>'random_state': 15} | 7 | 14 | 13 | 1 | 2 | 3 | 12 | 8  | 10 | 6  | 0 | 16 | 11 | 9  | 4 | 5 |

|    |           |                                                                                                                                        |   |    |    |   |   |   |    |    |    |    |   |    |    |    |   |   |
|----|-----------|----------------------------------------------------------------------------------------------------------------------------------------|---|----|----|---|---|---|----|----|----|----|---|----|----|----|---|---|
| 16 | RF,<br>PI | {'criterion': 'gini', 'max_depth': 2, 'max_features': 2, 'min_samples_leaf': 5, 'n_estimators': 500, 'n_jobs': -1, 'random_state': 16} | 6 | 16 | 13 | 2 | 1 | 3 | 10 | 5  | 14 | 7  | 0 | 9  | 12 | 11 | 8 | 4 |
| 17 | RF,<br>PI | {'criterion': 'gini', 'max_depth': 2, 'max_features': 2, 'min_samples_leaf': 5, 'n_estimators': 500, 'n_jobs': -1, 'random_state': 17} | 6 | 14 | 10 | 2 | 1 | 3 | 13 | 8  | 7  | 9  | 0 | 15 | 12 | 11 | 5 | 4 |
| 18 | RF,<br>PI | {'criterion': 'gini', 'max_depth': 2, 'max_features': 2, 'min_samples_leaf': 5, 'n_estimators': 500, 'n_jobs': -1, 'random_state': 18} | 5 | 13 | 10 | 3 | 2 | 1 | 11 | 8  | 12 | 7  | 0 | 16 | 15 | 9  | 6 | 4 |
| 19 | RF,<br>PI | {'criterion': 'gini', 'max_depth': 2, 'max_features': 2, 'min_samples_leaf': 5, 'n_estimators': 500, 'n_jobs': -1, 'random_state': 19} | 5 | 16 | 14 | 4 | 0 | 1 | 13 | 9  | 12 | 6  | 2 | 15 | 11 | 10 | 7 | 3 |
| 20 | RF,<br>PI | {'criterion': 'gini', 'max_depth': 2, 'max_features': 2, 'min_samples_leaf': 5, 'n_estimators': 500, 'n_jobs': -1, 'random_state': 20} | 5 | 14 | 8  | 3 | 1 | 2 | 16 | 12 | 13 | 6  | 0 | 15 | 11 | 9  | 7 | 4 |
| 21 | RF,<br>PI | {'criterion': 'gini', 'max_depth': 2, 'max_features': 2, 'min_samples_leaf': 5, 'n_estimators': 500, 'n_jobs': -1, 'random_state': 21} | 6 | 16 | 14 | 2 | 3 | 1 | 13 | 7  | 12 | 9  | 0 | 10 | 11 | 8  | 5 | 4 |
| 22 | RF,<br>PI | {'criterion': 'gini', 'max_depth': 2, 'max_features': 2, 'min_samples_leaf': 5, 'n_estimators': 500, 'n_jobs': -1, 'random_state': 22} | 6 | 15 | 13 | 2 | 1 | 3 | 10 | 9  | 14 | 11 | 0 | 12 | 7  | 8  | 5 | 4 |
| 23 | RF,<br>PI | {'criterion': 'gini', 'max_depth': 2, 'max_features': 2, 'min_samples_leaf': 5, 'n_estimators': 500, 'n_jobs': -1, 'random_state': 23} | 4 | 14 | 16 | 2 | 1 | 3 | 9  | 5  | 12 | 7  | 0 | 15 | 13 | 10 | 8 | 6 |
| 24 | RF,<br>PI | {'criterion': 'gini', 'max_depth': 2, 'max_features': 2, 'min_samples_leaf': 5, 'n_estimators': 500, 'n_jobs': -1, 'random_state': 24} | 4 | 15 | 14 | 2 | 0 | 3 | 8  | 6  | 12 | 5  | 1 | 16 | 11 | 10 | 7 | 9 |
| 25 | RF,<br>PI | {'criterion': 'gini', 'max_depth': 2, 'max_features': 2, 'min_samples_leaf': 5, 'n_estimators': 500, 'n_jobs': -1, 'random_state': 25} | 7 | 16 | 13 | 3 | 0 | 2 | 15 | 9  | 11 | 6  | 1 | 12 | 5  | 10 | 8 | 4 |

|    |           |                                                                                                                                        |   |    |    |   |   |   |    |    |    |    |   |    |    |    |   |   |
|----|-----------|----------------------------------------------------------------------------------------------------------------------------------------|---|----|----|---|---|---|----|----|----|----|---|----|----|----|---|---|
| 26 | RF,<br>PI | {'criterion': 'gini', 'max_depth': 2, 'max_features': 2, 'min_samples_leaf': 5, 'n_estimators': 500, 'n_jobs': -1, 'random_state': 26} | 5 | 16 | 14 | 3 | 1 | 2 | 8  | 7  | 12 | 11 | 0 | 9  | 10 | 13 | 6 | 4 |
| 27 | RF,<br>PI | {'criterion': 'gini', 'max_depth': 2, 'max_features': 2, 'min_samples_leaf': 5, 'n_estimators': 500, 'n_jobs': -1, 'random_state': 27} | 5 | 16 | 12 | 1 | 3 | 2 | 13 | 7  | 14 | 6  | 0 | 15 | 10 | 9  | 8 | 4 |
| 28 | RF,<br>PI | {'criterion': 'gini', 'max_depth': 2, 'max_features': 2, 'min_samples_leaf': 5, 'n_estimators': 500, 'n_jobs': -1, 'random_state': 28} | 4 | 15 | 13 | 2 | 1 | 5 | 16 | 8  | 11 | 6  | 0 | 10 | 9  | 12 | 7 | 3 |
| 29 | RF,<br>PI | {'criterion': 'gini', 'max_depth': 2, 'max_features': 2, 'min_samples_leaf': 5, 'n_estimators': 500, 'n_jobs': -1, 'random_state': 29} | 5 | 14 | 12 | 2 | 1 | 3 | 11 | 8  | 10 | 7  | 0 | 16 | 15 | 9  | 4 | 6 |
| 30 | RF,<br>PI | {'criterion': 'gini', 'max_depth': 2, 'max_features': 2, 'min_samples_leaf': 5, 'n_estimators': 500, 'n_jobs': -1, 'random_state': 30} | 4 | 15 | 16 | 1 | 3 | 2 | 8  | 10 | 13 | 5  | 0 | 12 | 11 | 9  | 7 | 6 |
| 31 | RF,<br>PI | {'criterion': 'gini', 'max_depth': 2, 'max_features': 2, 'min_samples_leaf': 5, 'n_estimators': 500, 'n_jobs': -1, 'random_state': 31} | 5 | 15 | 11 | 3 | 1 | 2 | 13 | 7  | 8  | 9  | 0 | 14 | 16 | 12 | 4 | 6 |
| 32 | RF,<br>PI | {'criterion': 'gini', 'max_depth': 2, 'max_features': 2, 'min_samples_leaf': 5, 'n_estimators': 500, 'n_jobs': -1, 'random_state': 32} | 5 | 16 | 13 | 2 | 1 | 3 | 14 | 8  | 9  | 7  | 0 | 11 | 12 | 10 | 6 | 4 |
| 33 | RF,<br>PI | {'criterion': 'gini', 'max_depth': 2, 'max_features': 2, 'min_samples_leaf': 5, 'n_estimators': 500, 'n_jobs': -1, 'random_state': 33} | 7 | 14 | 12 | 2 | 1 | 3 | 13 | 10 | 16 | 4  | 0 | 11 | 6  | 9  | 8 | 5 |
| 34 | RF,<br>PI | {'criterion': 'gini', 'max_depth': 2, 'max_features': 2, 'min_samples_leaf': 5, 'n_estimators': 500, 'n_jobs': -1, 'random_state': 34} | 6 | 16 | 14 | 3 | 1 | 2 | 8  | 4  | 11 | 12 | 0 | 15 | 10 | 9  | 7 | 5 |
| 35 | RF,<br>PI | {'criterion': 'gini', 'max_depth': 2, 'max_features': 2, 'min_samples_leaf': 5, 'n_estimators': 500, 'n_jobs': -1, 'random_state': 35} | 4 | 16 | 15 | 2 | 1 | 3 | 14 | 9  | 11 | 6  | 0 | 8  | 10 | 12 | 7 | 5 |

|    |           |                                                                                                                                              |   |    |    |   |   |   |    |    |    |    |   |    |    |    |    |    |
|----|-----------|----------------------------------------------------------------------------------------------------------------------------------------------|---|----|----|---|---|---|----|----|----|----|---|----|----|----|----|----|
| 36 | RF,<br>PI | {'criterion': 'gini', 'max_depth': 2, 'max_features': 2,<br>'min_samples_leaf': 5, 'n_estimators': 500, 'n_jobs': -1,<br>'random_state': 36} | 4 | 16 | 14 | 3 | 1 | 2 | 7  | 5  | 12 | 8  | 0 | 9  | 10 | 13 | 11 | 6  |
| 37 | RF,<br>PI | {'criterion': 'gini', 'max_depth': 2, 'max_features': 2,<br>'min_samples_leaf': 5, 'n_estimators': 500, 'n_jobs': -1,<br>'random_state': 37} | 4 | 13 | 15 | 0 | 2 | 3 | 10 | 8  | 9  | 7  | 1 | 16 | 12 | 11 | 5  | 6  |
| 38 | RF,<br>PI | {'criterion': 'gini', 'max_depth': 2, 'max_features': 2,<br>'min_samples_leaf': 5, 'n_estimators': 500, 'n_jobs': -1,<br>'random_state': 38} | 4 | 16 | 15 | 2 | 0 | 3 | 8  | 10 | 14 | 7  | 1 | 11 | 6  | 13 | 9  | 5  |
| 39 | RF,<br>PI | {'criterion': 'gini', 'max_depth': 2, 'max_features': 2,<br>'min_samples_leaf': 5, 'n_estimators': 500, 'n_jobs': -1,<br>'random_state': 39} | 6 | 16 | 12 | 1 | 0 | 3 | 11 | 7  | 10 | 8  | 2 | 14 | 5  | 13 | 9  | 4  |
| 40 | RF,<br>PI | {'criterion': 'gini', 'max_depth': 2, 'max_features': 2,<br>'min_samples_leaf': 5, 'n_estimators': 500, 'n_jobs': -1,<br>'random_state': 40} | 4 | 16 | 15 | 2 | 0 | 3 | 6  | 13 | 12 | 10 | 1 | 7  | 8  | 11 | 9  | 5  |
| 41 | RF,<br>PI | {'criterion': 'gini', 'max_depth': 2, 'max_features': 2,<br>'min_samples_leaf': 5, 'n_estimators': 500, 'n_jobs': -1,<br>'random_state': 41} | 5 | 15 | 9  | 3 | 1 | 2 | 12 | 8  | 11 | 7  | 0 | 14 | 13 | 10 | 6  | 4  |
| 42 | RF,<br>PI | {'criterion': 'gini', 'max_depth': 2, 'max_features': 2,<br>'min_samples_leaf': 5, 'n_estimators': 500, 'n_jobs': -1,<br>'random_state': 42} | 4 | 16 | 11 | 2 | 1 | 3 | 5  | 6  | 12 | 8  | 0 | 15 | 7  | 10 | 9  | 13 |
| 43 | RF,<br>PI | {'criterion': 'gini', 'max_depth': 2, 'max_features': 2,<br>'min_samples_leaf': 5, 'n_estimators': 500, 'n_jobs': -1,<br>'random_state': 43} | 4 | 15 | 14 | 3 | 1 | 2 | 16 | 7  | 13 | 9  | 0 | 10 | 11 | 12 | 6  | 5  |
| 44 | RF,<br>PI | {'criterion': 'gini', 'max_depth': 2, 'max_features': 2,<br>'min_samples_leaf': 5, 'n_estimators': 500, 'n_jobs': -1,<br>'random_state': 44} | 4 | 14 | 13 | 1 | 3 | 2 | 10 | 5  | 11 | 7  | 0 | 15 | 16 | 9  | 8  | 6  |
| 45 | RF,<br>PI | {'criterion': 'gini', 'max_depth': 2, 'max_features': 2,<br>'min_samples_leaf': 5, 'n_estimators': 500, 'n_jobs': -1,<br>'random_state': 45} | 5 | 13 | 12 | 2 | 3 | 1 | 11 | 10 | 9  | 6  | 0 | 16 | 15 | 8  | 7  | 4  |

|    |           |                                                                                                                                              |   |    |    |   |   |   |    |    |    |    |   |    |    |    |    |   |
|----|-----------|----------------------------------------------------------------------------------------------------------------------------------------------|---|----|----|---|---|---|----|----|----|----|---|----|----|----|----|---|
| 46 | RF,<br>PI | {'criterion': 'gini', 'max_depth': 2, 'max_features': 2,<br>'min_samples_leaf': 5, 'n_estimators': 500, 'n_jobs': -1,<br>'random_state': 46} | 4 | 13 | 11 | 2 | 3 | 1 | 10 | 14 | 15 | 8  | 0 | 7  | 16 | 9  | 6  | 5 |
| 47 | RF,<br>PI | {'criterion': 'gini', 'max_depth': 2, 'max_features': 2,<br>'min_samples_leaf': 5, 'n_estimators': 500, 'n_jobs': -1,<br>'random_state': 47} | 5 | 16 | 10 | 2 | 1 | 3 | 14 | 7  | 12 | 11 | 0 | 9  | 6  | 15 | 8  | 4 |
| 48 | RF,<br>PI | {'criterion': 'gini', 'max_depth': 2, 'max_features': 2,<br>'min_samples_leaf': 5, 'n_estimators': 500, 'n_jobs': -1,<br>'random_state': 48} | 4 | 16 | 15 | 1 | 0 | 3 | 12 | 8  | 13 | 5  | 2 | 14 | 9  | 11 | 7  | 6 |
| 49 | RF,<br>PI | {'criterion': 'gini', 'max_depth': 2, 'max_features': 2,<br>'min_samples_leaf': 5, 'n_estimators': 500, 'n_jobs': -1,<br>'random_state': 49} | 4 | 14 | 13 | 3 | 1 | 2 | 10 | 7  | 11 | 6  | 0 | 16 | 15 | 9  | 5  | 8 |
| 50 | RF,<br>PI | {'criterion': 'gini', 'max_depth': 2, 'max_features': 2,<br>'min_samples_leaf': 5, 'n_estimators': 500, 'n_jobs': -1,<br>'random_state': 50} | 6 | 15 | 14 | 2 | 1 | 3 | 10 | 9  | 12 | 7  | 0 | 16 | 13 | 11 | 5  | 4 |
| 51 | RF,<br>PI | {'criterion': 'gini', 'max_depth': 2, 'max_features': 2,<br>'min_samples_leaf': 5, 'n_estimators': 500, 'n_jobs': -1,<br>'random_state': 51} | 4 | 16 | 15 | 3 | 1 | 2 | 9  | 6  | 12 | 7  | 0 | 13 | 8  | 14 | 10 | 5 |
| 52 | RF,<br>PI | {'criterion': 'gini', 'max_depth': 2, 'max_features': 2,<br>'min_samples_leaf': 5, 'n_estimators': 500, 'n_jobs': -1,<br>'random_state': 52} | 6 | 15 | 16 | 2 | 0 | 3 | 8  | 5  | 14 | 4  | 1 | 12 | 10 | 11 | 9  | 7 |
| 53 | RF,<br>PI | {'criterion': 'gini', 'max_depth': 2, 'max_features': 2,<br>'min_samples_leaf': 5, 'n_estimators': 500, 'n_jobs': -1,<br>'random_state': 53} | 4 | 15 | 12 | 2 | 1 | 3 | 13 | 9  | 14 | 6  | 0 | 11 | 8  | 10 | 5  | 7 |
| 54 | RF,<br>PI | {'criterion': 'gini', 'max_depth': 2, 'max_features': 2,<br>'min_samples_leaf': 5, 'n_estimators': 500, 'n_jobs': -1,<br>'random_state': 54} | 4 | 15 | 13 | 2 | 1 | 3 | 8  | 7  | 12 | 9  | 0 | 16 | 11 | 10 | 6  | 5 |
| 55 | RF,<br>PI | {'criterion': 'gini', 'max_depth': 2, 'max_features': 2,<br>'min_samples_leaf': 5, 'n_estimators': 500, 'n_jobs': -1,<br>'random_state': 55} | 6 | 15 | 16 | 2 | 1 | 3 | 10 | 8  | 14 | 4  | 0 | 11 | 9  | 12 | 5  | 7 |

|    |           |                                                                                                                                        |   |    |    |   |   |   |    |    |    |    |   |    |    |    |    |   |
|----|-----------|----------------------------------------------------------------------------------------------------------------------------------------|---|----|----|---|---|---|----|----|----|----|---|----|----|----|----|---|
| 56 | RF,<br>PI | {'criterion': 'gini', 'max_depth': 2, 'max_features': 2, 'min_samples_leaf': 5, 'n_estimators': 500, 'n_jobs': -1, 'random_state': 56} | 9 | 16 | 14 | 3 | 1 | 2 | 15 | 7  | 11 | 4  | 0 | 13 | 12 | 10 | 8  | 6 |
| 57 | RF,<br>PI | {'criterion': 'gini', 'max_depth': 2, 'max_features': 2, 'min_samples_leaf': 5, 'n_estimators': 500, 'n_jobs': -1, 'random_state': 57} | 4 | 16 | 14 | 3 | 0 | 2 | 12 | 8  | 11 | 7  | 1 | 10 | 9  | 13 | 6  | 5 |
| 58 | RF,<br>PI | {'criterion': 'gini', 'max_depth': 2, 'max_features': 2, 'min_samples_leaf': 5, 'n_estimators': 500, 'n_jobs': -1, 'random_state': 58} | 4 | 16 | 13 | 2 | 3 | 1 | 11 | 5  | 12 | 15 | 0 | 14 | 8  | 9  | 7  | 6 |
| 59 | RF,<br>PI | {'criterion': 'gini', 'max_depth': 2, 'max_features': 2, 'min_samples_leaf': 5, 'n_estimators': 500, 'n_jobs': -1, 'random_state': 59} | 4 | 15 | 12 | 1 | 2 | 0 | 10 | 6  | 11 | 14 | 3 | 8  | 9  | 13 | 5  | 7 |
| 60 | RF,<br>PI | {'criterion': 'gini', 'max_depth': 2, 'max_features': 2, 'min_samples_leaf': 5, 'n_estimators': 500, 'n_jobs': -1, 'random_state': 60} | 6 | 16 | 15 | 2 | 0 | 3 | 10 | 5  | 9  | 4  | 1 | 14 | 12 | 11 | 8  | 7 |
| 61 | RF,<br>PI | {'criterion': 'gini', 'max_depth': 2, 'max_features': 2, 'min_samples_leaf': 5, 'n_estimators': 500, 'n_jobs': -1, 'random_state': 61} | 5 | 13 | 12 | 2 | 0 | 3 | 7  | 8  | 11 | 10 | 1 | 16 | 14 | 9  | 6  | 4 |
| 62 | RF,<br>PI | {'criterion': 'gini', 'max_depth': 2, 'max_features': 2, 'min_samples_leaf': 5, 'n_estimators': 500, 'n_jobs': -1, 'random_state': 62} | 4 | 13 | 16 | 2 | 1 | 3 | 12 | 10 | 8  | 7  | 0 | 15 | 9  | 11 | 6  | 5 |
| 63 | RF,<br>PI | {'criterion': 'gini', 'max_depth': 2, 'max_features': 2, 'min_samples_leaf': 5, 'n_estimators': 500, 'n_jobs': -1, 'random_state': 63} | 4 | 16 | 13 | 3 | 1 | 2 | 10 | 5  | 11 | 7  | 0 | 12 | 8  | 14 | 9  | 6 |
| 64 | RF,<br>PI | {'criterion': 'gini', 'max_depth': 2, 'max_features': 2, 'min_samples_leaf': 5, 'n_estimators': 500, 'n_jobs': -1, 'random_state': 64} | 4 | 16 | 13 | 3 | 0 | 2 | 11 | 8  | 9  | 5  | 1 | 15 | 7  | 12 | 10 | 6 |
| 65 | RF,<br>PI | {'criterion': 'gini', 'max_depth': 2, 'max_features': 2, 'min_samples_leaf': 5, 'n_estimators': 500, 'n_jobs': -1, 'random_state': 65} | 3 | 15 | 13 | 2 | 1 | 4 | 12 | 9  | 8  | 6  | 0 | 16 | 11 | 10 | 5  | 7 |



|    |           |                                                                                                                                        |   |    |    |   |   |   |    |    |    |    |   |    |    |    |    |    |
|----|-----------|----------------------------------------------------------------------------------------------------------------------------------------|---|----|----|---|---|---|----|----|----|----|---|----|----|----|----|----|
| 66 | RF,<br>PI | {'criterion': 'gini', 'max_depth': 2, 'max_features': 2, 'min_samples_leaf': 5, 'n_estimators': 500, 'n_jobs': -1, 'random_state': 66} | 3 | 16 | 13 | 4 | 1 | 2 | 9  | 5  | 12 | 8  | 0 | 11 | 14 | 6  | 7  | 10 |
| 67 | RF,<br>PI | {'criterion': 'gini', 'max_depth': 2, 'max_features': 2, 'min_samples_leaf': 5, 'n_estimators': 500, 'n_jobs': -1, 'random_state': 67} | 5 | 16 | 13 | 2 | 1 | 3 | 12 | 9  | 10 | 8  | 0 | 7  | 4  | 15 | 11 | 6  |
| 68 | RF,<br>PI | {'criterion': 'gini', 'max_depth': 2, 'max_features': 2, 'min_samples_leaf': 5, 'n_estimators': 500, 'n_jobs': -1, 'random_state': 68} | 7 | 15 | 14 | 3 | 0 | 1 | 16 | 11 | 10 | 5  | 2 | 8  | 12 | 9  | 6  | 4  |
| 69 | RF,<br>PI | {'criterion': 'gini', 'max_depth': 2, 'max_features': 2, 'min_samples_leaf': 5, 'n_estimators': 500, 'n_jobs': -1, 'random_state': 69} | 4 | 14 | 11 | 2 | 3 | 0 | 13 | 6  | 7  | 10 | 1 | 16 | 12 | 9  | 5  | 8  |
| 70 | RF,<br>PI | {'criterion': 'gini', 'max_depth': 2, 'max_features': 2, 'min_samples_leaf': 5, 'n_estimators': 500, 'n_jobs': -1, 'random_state': 70} | 5 | 16 | 12 | 1 | 2 | 4 | 14 | 6  | 11 | 10 | 0 | 8  | 13 | 9  | 7  | 3  |
| 71 | RF,<br>PI | {'criterion': 'gini', 'max_depth': 2, 'max_features': 2, 'min_samples_leaf': 5, 'n_estimators': 500, 'n_jobs': -1, 'random_state': 71} | 4 | 15 | 11 | 1 | 2 | 3 | 7  | 6  | 9  | 14 | 0 | 13 | 12 | 10 | 8  | 5  |
| 72 | RF,<br>PI | {'criterion': 'gini', 'max_depth': 2, 'max_features': 2, 'min_samples_leaf': 5, 'n_estimators': 500, 'n_jobs': -1, 'random_state': 72} | 5 | 15 | 12 | 3 | 1 | 2 | 9  | 8  | 6  | 11 | 0 | 16 | 14 | 10 | 7  | 4  |
| 73 | RF,<br>PI | {'criterion': 'gini', 'max_depth': 2, 'max_features': 2, 'min_samples_leaf': 5, 'n_estimators': 500, 'n_jobs': -1, 'random_state': 73} | 4 | 16 | 13 | 2 | 0 | 3 | 12 | 5  | 9  | 6  | 1 | 14 | 7  | 8  | 11 | 10 |
| 74 | RF,<br>PI | {'criterion': 'gini', 'max_depth': 2, 'max_features': 2, 'min_samples_leaf': 5, 'n_estimators': 500, 'n_jobs': -1, 'random_state': 74} | 8 | 16 | 13 | 1 | 2 | 3 | 10 | 7  | 12 | 6  | 0 | 14 | 4  | 11 | 9  | 5  |
| 75 | RF,<br>PI | {'criterion': 'gini', 'max_depth': 2, 'max_features': 2, 'min_samples_leaf': 5, 'n_estimators': 500, 'n_jobs': -1, 'random_state': 75} | 6 | 14 | 12 | 2 | 1 | 3 | 10 | 7  | 9  | 5  | 0 | 16 | 15 | 11 | 8  | 4  |

|    |           |                                                                                                                                        |   |    |    |   |   |   |    |   |    |    |   |    |    |    |    |   |
|----|-----------|----------------------------------------------------------------------------------------------------------------------------------------|---|----|----|---|---|---|----|---|----|----|---|----|----|----|----|---|
| 76 | RF,<br>PI | {'criterion': 'gini', 'max_depth': 2, 'max_features': 2, 'min_samples_leaf': 5, 'n_estimators': 500, 'n_jobs': -1, 'random_state': 76} | 5 | 16 | 15 | 2 | 1 | 3 | 14 | 6 | 11 | 9  | 0 | 13 | 8  | 10 | 7  | 4 |
| 77 | RF,<br>PI | {'criterion': 'gini', 'max_depth': 2, 'max_features': 2, 'min_samples_leaf': 5, 'n_estimators': 500, 'n_jobs': -1, 'random_state': 77} | 4 | 16 | 14 | 1 | 0 | 3 | 7  | 9 | 10 | 6  | 2 | 15 | 11 | 12 | 8  | 5 |
| 78 | RF,<br>PI | {'criterion': 'gini', 'max_depth': 2, 'max_features': 2, 'min_samples_leaf': 5, 'n_estimators': 500, 'n_jobs': -1, 'random_state': 78} | 6 | 15 | 12 | 2 | 0 | 3 | 13 | 8 | 10 | 5  | 1 | 14 | 16 | 11 | 7  | 4 |
| 79 | RF,<br>PI | {'criterion': 'gini', 'max_depth': 2, 'max_features': 2, 'min_samples_leaf': 5, 'n_estimators': 500, 'n_jobs': -1, 'random_state': 79} | 3 | 16 | 10 | 1 | 4 | 2 | 14 | 8 | 12 | 7  | 0 | 15 | 11 | 9  | 5  | 6 |
| 80 | RF,<br>PI | {'criterion': 'gini', 'max_depth': 2, 'max_features': 2, 'min_samples_leaf': 5, 'n_estimators': 500, 'n_jobs': -1, 'random_state': 80} | 4 | 11 | 14 | 0 | 3 | 1 | 15 | 7 | 10 | 5  | 2 | 16 | 13 | 9  | 8  | 6 |
| 81 | RF,<br>PI | {'criterion': 'gini', 'max_depth': 2, 'max_features': 2, 'min_samples_leaf': 5, 'n_estimators': 500, 'n_jobs': -1, 'random_state': 81} | 5 | 15 | 13 | 2 | 0 | 3 | 9  | 8 | 14 | 7  | 1 | 11 | 6  | 12 | 10 | 4 |
| 82 | RF,<br>PI | {'criterion': 'gini', 'max_depth': 2, 'max_features': 2, 'min_samples_leaf': 5, 'n_estimators': 500, 'n_jobs': -1, 'random_state': 82} | 4 | 14 | 15 | 3 | 1 | 2 | 16 | 9 | 10 | 13 | 0 | 7  | 6  | 12 | 5  | 8 |
| 83 | RF,<br>PI | {'criterion': 'gini', 'max_depth': 2, 'max_features': 2, 'min_samples_leaf': 5, 'n_estimators': 500, 'n_jobs': -1, 'random_state': 83} | 2 | 16 | 14 | 5 | 0 | 3 | 11 | 7 | 12 | 4  | 1 | 10 | 9  | 13 | 6  | 8 |
| 84 | RF,<br>PI | {'criterion': 'gini', 'max_depth': 2, 'max_features': 2, 'min_samples_leaf': 5, 'n_estimators': 500, 'n_jobs': -1, 'random_state': 84} | 5 | 16 | 12 | 3 | 0 | 2 | 8  | 7 | 14 | 10 | 1 | 13 | 9  | 11 | 4  | 6 |
| 85 | RF,<br>PI | {'criterion': 'gini', 'max_depth': 2, 'max_features': 2, 'min_samples_leaf': 5, 'n_estimators': 500, 'n_jobs': -1, 'random_state': 85} | 6 | 14 | 11 | 2 | 1 | 3 | 12 | 7 | 10 | 8  | 0 | 16 | 15 | 9  | 5  | 4 |

|    |           |                                                                                                                                              |    |    |    |   |   |   |    |    |    |    |   |    |    |    |   |   |
|----|-----------|----------------------------------------------------------------------------------------------------------------------------------------------|----|----|----|---|---|---|----|----|----|----|---|----|----|----|---|---|
| 86 | RF,<br>PI | {'criterion': 'gini', 'max_depth': 2, 'max_features': 2,<br>'min_samples_leaf': 5, 'n_estimators': 500, 'n_jobs': -1,<br>'random_state': 86} | 8  | 16 | 15 | 1 | 2 | 3 | 14 | 5  | 10 | 6  | 0 | 11 | 13 | 9  | 7 | 4 |
| 87 | RF,<br>PI | {'criterion': 'gini', 'max_depth': 2, 'max_features': 2,<br>'min_samples_leaf': 5, 'n_estimators': 500, 'n_jobs': -1,<br>'random_state': 87} | 4  | 12 | 15 | 3 | 2 | 1 | 13 | 8  | 9  | 7  | 0 | 16 | 14 | 10 | 5 | 6 |
| 88 | RF,<br>PI | {'criterion': 'gini', 'max_depth': 2, 'max_features': 2,<br>'min_samples_leaf': 5, 'n_estimators': 500, 'n_jobs': -1,<br>'random_state': 88} | 10 | 16 | 14 | 2 | 0 | 4 | 6  | 11 | 9  | 3  | 1 | 13 | 12 | 15 | 5 | 7 |
| 89 | RF,<br>PI | {'criterion': 'gini', 'max_depth': 2, 'max_features': 2,<br>'min_samples_leaf': 5, 'n_estimators': 500, 'n_jobs': -1,<br>'random_state': 89} | 4  | 16 | 15 | 1 | 3 | 2 | 8  | 6  | 11 | 5  | 0 | 14 | 10 | 13 | 9 | 7 |
| 90 | RF,<br>PI | {'criterion': 'gini', 'max_depth': 2, 'max_features': 2,<br>'min_samples_leaf': 5, 'n_estimators': 500, 'n_jobs': -1,<br>'random_state': 90} | 5  | 16 | 14 | 3 | 1 | 2 | 8  | 7  | 15 | 11 | 0 | 10 | 12 | 9  | 6 | 4 |
| 91 | RF,<br>PI | {'criterion': 'gini', 'max_depth': 2, 'max_features': 2,<br>'min_samples_leaf': 5, 'n_estimators': 500, 'n_jobs': -1,<br>'random_state': 91} | 5  | 14 | 15 | 2 | 3 | 1 | 6  | 8  | 16 | 9  | 0 | 11 | 12 | 13 | 4 | 7 |
| 92 | RF,<br>PI | {'criterion': 'gini', 'max_depth': 2, 'max_features': 2,<br>'min_samples_leaf': 5, 'n_estimators': 500, 'n_jobs': -1,<br>'random_state': 92} | 3  | 16 | 15 | 4 | 0 | 2 | 10 | 12 | 14 | 5  | 1 | 8  | 6  | 11 | 9 | 7 |
| 93 | RF,<br>PI | {'criterion': 'gini', 'max_depth': 2, 'max_features': 2,<br>'min_samples_leaf': 5, 'n_estimators': 500, 'n_jobs': -1,<br>'random_state': 93} | 4  | 13 | 14 | 0 | 3 | 2 | 9  | 10 | 12 | 7  | 1 | 15 | 11 | 8  | 6 | 5 |
| 94 | RF,<br>PI | {'criterion': 'gini', 'max_depth': 2, 'max_features': 2,<br>'min_samples_leaf': 5, 'n_estimators': 500, 'n_jobs': -1,<br>'random_state': 94} | 6  | 16 | 9  | 0 | 3 | 2 | 14 | 7  | 13 | 12 | 1 | 15 | 10 | 8  | 5 | 4 |
| 95 | RF,<br>PI | {'criterion': 'gini', 'max_depth': 2, 'max_features': 2,<br>'min_samples_leaf': 5, 'n_estimators': 500, 'n_jobs': -1,<br>'random_state': 95} | 4  | 11 | 15 | 3 | 1 | 2 | 7  | 5  | 14 | 9  | 0 | 10 | 12 | 13 | 6 | 8 |

|    |            |                                                                                                                                        |   |    |    |   |   |   |    |    |    |    |    |    |    |    |   |    |
|----|------------|----------------------------------------------------------------------------------------------------------------------------------------|---|----|----|---|---|---|----|----|----|----|----|----|----|----|---|----|
| 96 | RF,<br>PI  | {'criterion': 'gini', 'max_depth': 2, 'max_features': 2, 'min_samples_leaf': 5, 'n_estimators': 500, 'n_jobs': -1, 'random_state': 96} | 4 | 16 | 15 | 2 | 1 | 3 | 14 | 7  | 11 | 6  | 0  | 10 | 12 | 9  | 8 | 5  |
| 97 | RF,<br>PI  | {'criterion': 'gini', 'max_depth': 2, 'max_features': 2, 'min_samples_leaf': 5, 'n_estimators': 500, 'n_jobs': -1, 'random_state': 97} | 4 | 16 | 13 | 3 | 2 | 1 | 8  | 9  | 14 | 15 | 0  | 10 | 6  | 11 | 5 | 7  |
| 98 | RF,<br>PI  | {'criterion': 'gini', 'max_depth': 2, 'max_features': 2, 'min_samples_leaf': 5, 'n_estimators': 500, 'n_jobs': -1, 'random_state': 98} | 8 | 16 | 14 | 2 | 1 | 3 | 13 | 7  | 10 | 4  | 0  | 15 | 12 | 9  | 5 | 6  |
| 99 | RF,<br>PI  | {'criterion': 'gini', 'max_depth': 2, 'max_features': 2, 'min_samples_leaf': 5, 'n_estimators': 500, 'n_jobs': -1, 'random_state': 99} | 4 | 16 | 15 | 3 | 1 | 5 | 14 | 7  | 13 | 10 | 0  | 11 | 8  | 9  | 6 | 2  |
| 0  | XGB,<br>PI | {'colsample_bytree': 0.6, 'gamma': 0.5, 'max_depth': 2, 'min_child_weight': 5, 'random_state': 0, 'subsample': 0.6}                    | 0 | 16 | 6  | 2 | 5 | 3 | 1  | 9  | 14 | 8  | 7  | 11 | 10 | 12 | 4 | 13 |
| 1  | XGB,<br>PI | {'colsample_bytree': 0.6, 'gamma': 0.5, 'max_depth': 2, 'min_child_weight': 5, 'random_state': 1, 'subsample': 0.6}                    | 0 | 14 | 3  | 5 | 4 | 6 | 2  | 12 | 13 | 7  | 10 | 15 | 8  | 11 | 1 | 9  |
| 2  | XGB,<br>PI | {'colsample_bytree': 0.6, 'gamma': 0.5, 'max_depth': 2, 'min_child_weight': 5, 'random_state': 2, 'subsample': 0.6}                    | 0 | 12 | 8  | 1 | 6 | 3 | 4  | 11 | 16 | 7  | 9  | 15 | 5  | 13 | 2 | 10 |
| 3  | XGB,<br>PI | {'colsample_bytree': 0.6, 'gamma': 0.5, 'max_depth': 2, 'min_child_weight': 5, 'random_state': 3, 'subsample': 0.6}                    | 0 | 15 | 9  | 1 | 8 | 2 | 5  | 7  | 16 | 6  | 4  | 12 | 11 | 13 | 3 | 10 |
| 4  | XGB,<br>PI | {'colsample_bytree': 0.6, 'gamma': 0.5, 'max_depth': 2, 'min_child_weight': 5, 'random_state': 4, 'subsample': 0.6}                    | 0 | 14 | 7  | 2 | 3 | 4 | 6  | 13 | 16 | 9  | 8  | 10 | 5  | 15 | 1 | 11 |
| 5  | XGB,<br>PI | {'colsample_bytree': 0.6, 'gamma': 0.5, 'max_depth': 2, 'min_child_weight': 5, 'random_state': 5, 'subsample': 0.6}                    | 1 | 12 | 9  | 0 | 4 | 3 | 5  | 10 | 14 | 8  | 7  | 13 | 6  | 11 | 2 | 16 |
| 6  | XGB,<br>PI | {'colsample_bytree': 0.6, 'gamma': 0.5, 'max_depth': 2, 'min_child_weight': 5, 'random_state': 6, 'subsample': 0.6}                    | 0 | 14 | 6  | 1 | 3 | 5 | 7  | 8  | 16 | 9  | 2  | 12 | 10 | 13 | 4 | 11 |
| 7  | XGB,<br>PI | {'colsample_bytree': 0.6, 'gamma': 0.5, 'max_depth': 2, 'min_child_weight': 5, 'random_state': 7, 'subsample': 0.6}                    | 0 | 13 | 6  | 1 | 4 | 5 | 7  | 10 | 15 | 9  | 11 | 16 | 3  | 14 | 2 | 8  |
| 8  | XGB,<br>PI | {'colsample_bytree': 0.6, 'gamma': 0.5, 'max_depth': 2, 'min_child_weight': 5, 'random_state': 8, 'subsample': 0.6}                    | 1 | 15 | 7  | 0 | 3 | 6 | 2  | 11 | 13 | 12 | 5  | 10 | 8  | 9  | 4 | 14 |

|    |            |                                                                                                                      |   |    |    |   |   |   |   |    |    |    |    |    |    |    |   |    |  |
|----|------------|----------------------------------------------------------------------------------------------------------------------|---|----|----|---|---|---|---|----|----|----|----|----|----|----|---|----|--|
| 9  | XGB,<br>PI | {'colsample_bytree': 0.6, 'gamma': 0.5, 'max_depth': 2, 'min_child_weight': 5, 'random_state': 9, 'subsample': 0.6}  | 1 | 15 | 9  | 0 | 8 | 7 | 4 | 10 | 14 | 5  | 3  | 11 | 6  | 13 | 2 | 16 |  |
| 10 | XGB,<br>PI | {'colsample_bytree': 0.6, 'gamma': 0.5, 'max_depth': 2, 'min_child_weight': 5, 'random_state': 10, 'subsample': 0.6} | 0 | 14 | 8  | 1 | 5 | 4 | 3 | 9  | 11 | 10 | 6  | 13 | 7  | 12 | 2 | 16 |  |
| 11 | XGB,<br>PI | {'colsample_bytree': 0.6, 'gamma': 0.5, 'max_depth': 2, 'min_child_weight': 5, 'random_state': 11, 'subsample': 0.6} | 1 | 13 | 10 | 0 | 6 | 5 | 4 | 8  | 14 | 9  | 3  | 15 | 7  | 11 | 2 | 12 |  |
| 12 | XGB,<br>PI | {'colsample_bytree': 0.6, 'gamma': 0.5, 'max_depth': 2, 'min_child_weight': 5, 'random_state': 12, 'subsample': 0.6} | 0 | 11 | 9  | 1 | 5 | 3 | 4 | 7  | 15 | 8  | 12 | 6  | 10 | 13 | 2 | 14 |  |
| 13 | XGB,<br>PI | {'colsample_bytree': 0.6, 'gamma': 0.5, 'max_depth': 2, 'min_child_weight': 5, 'random_state': 13, 'subsample': 0.6} | 2 | 11 | 8  | 1 | 3 | 4 | 5 | 10 | 16 | 9  | 6  | 13 | 7  | 12 | 0 | 14 |  |
| 14 | XGB,<br>PI | {'colsample_bytree': 0.6, 'gamma': 0.5, 'max_depth': 2, 'min_child_weight': 5, 'random_state': 14, 'subsample': 0.6} | 0 | 15 | 5  | 1 | 7 | 8 | 3 | 11 | 14 | 9  | 4  | 16 | 6  | 10 | 2 | 13 |  |
| 15 | XGB,<br>PI | {'colsample_bytree': 0.6, 'gamma': 0.5, 'max_depth': 2, 'min_child_weight': 5, 'random_state': 15, 'subsample': 0.6} | 1 | 12 | 4  | 0 | 5 | 7 | 6 | 10 | 14 | 8  | 9  | 15 | 3  | 11 | 2 | 16 |  |
| 16 | XGB,<br>PI | {'colsample_bytree': 0.6, 'gamma': 0.5, 'max_depth': 2, 'min_child_weight': 5, 'random_state': 16, 'subsample': 0.6} | 0 | 14 | 4  | 1 | 6 | 5 | 3 | 12 | 13 | 9  | 7  | 11 | 10 | 15 | 2 | 8  |  |
| 17 | XGB,<br>PI | {'colsample_bytree': 0.6, 'gamma': 0.5, 'max_depth': 2, 'min_child_weight': 5, 'random_state': 17, 'subsample': 0.6} | 0 | 16 | 6  | 2 | 3 | 4 | 7 | 9  | 14 | 10 | 5  | 8  | 13 | 12 | 1 | 11 |  |
| 18 | XGB,<br>PI | {'colsample_bytree': 0.6, 'gamma': 0.5, 'max_depth': 2, 'min_child_weight': 5, 'random_state': 18, 'subsample': 0.6} | 0 | 14 | 9  | 2 | 4 | 6 | 3 | 8  | 15 | 5  | 10 | 12 | 7  | 13 | 1 | 11 |  |
| 19 | XGB,<br>PI | {'colsample_bytree': 0.6, 'gamma': 0.5, 'max_depth': 2, 'min_child_weight': 5, 'random_state': 19, 'subsample': 0.6} | 0 | 11 | 7  | 1 | 6 | 5 | 3 | 12 | 13 | 9  | 4  | 8  | 14 | 15 | 2 | 10 |  |
| 20 | XGB,<br>PI | {'colsample_bytree': 0.6, 'gamma': 0.5, 'max_depth': 2, 'min_child_weight': 5, 'random_state': 20, 'subsample': 0.6} | 0 | 11 | 9  | 2 | 5 | 3 | 4 | 10 | 13 | 8  | 7  | 14 | 6  | 16 | 1 | 15 |  |
| 21 | XGB,<br>PI | {'colsample_bytree': 0.6, 'gamma': 0.5, 'max_depth': 2, 'min_child_weight': 5, 'random_state': 21, 'subsample': 0.6} | 3 | 14 | 6  | 2 | 8 | 0 | 4 | 10 | 15 | 7  | 5  | 13 | 9  | 12 | 1 | 11 |  |
| 22 | XGB,<br>PI | {'colsample_bytree': 0.6, 'gamma': 0.5, 'max_depth': 2, 'min_child_weight': 5, 'random_state': 22, 'subsample': 0.6} | 1 | 13 | 6  | 2 | 5 | 8 | 4 | 9  | 14 | 16 | 7  | 11 | 3  | 15 | 0 | 10 |  |
| 23 | XGB,<br>PI | {'colsample_bytree': 0.6, 'gamma': 0.5, 'max_depth': 2, 'min_child_weight': 5, 'random_state': 23, 'subsample': 0.6} | 0 | 16 | 6  | 1 | 4 | 3 | 7 | 10 | 12 | 8  | 5  | 11 | 9  | 14 | 2 | 15 |  |

|    |            |                                                                                                                         |   |    |    |   |   |   |   |    |    |    |   |    |    |    |   |    |  |
|----|------------|-------------------------------------------------------------------------------------------------------------------------|---|----|----|---|---|---|---|----|----|----|---|----|----|----|---|----|--|
| 24 | XGB,<br>PI | {'colsample_bytree': 0.6, 'gamma': 0.5, 'max_depth': 2,<br>'min_child_weight': 5, 'random_state': 24, 'subsample': 0.6} | 0 | 11 | 4  | 1 | 5 | 3 | 6 | 9  | 15 | 7  | 8 | 12 | 10 | 14 | 2 | 13 |  |
| 25 | XGB,<br>PI | {'colsample_bytree': 0.6, 'gamma': 0.5, 'max_depth': 2,<br>'min_child_weight': 5, 'random_state': 25, 'subsample': 0.6} | 1 | 10 | 12 | 0 | 4 | 6 | 5 | 9  | 11 | 7  | 8 | 13 | 2  | 16 | 3 | 14 |  |
| 26 | XGB,<br>PI | {'colsample_bytree': 0.6, 'gamma': 0.5, 'max_depth': 2,<br>'min_child_weight': 5, 'random_state': 26, 'subsample': 0.6} | 0 | 16 | 9  | 1 | 3 | 5 | 4 | 15 | 14 | 7  | 8 | 12 | 6  | 10 | 2 | 11 |  |
| 27 | XGB,<br>PI | {'colsample_bytree': 0.6, 'gamma': 0.5, 'max_depth': 2,<br>'min_child_weight': 5, 'random_state': 27, 'subsample': 0.6} | 0 | 11 | 7  | 1 | 5 | 3 | 4 | 9  | 14 | 6  | 8 | 12 | 13 | 16 | 2 | 10 |  |
| 28 | XGB,<br>PI | {'colsample_bytree': 0.6, 'gamma': 0.5, 'max_depth': 2,<br>'min_child_weight': 5, 'random_state': 28, 'subsample': 0.6} | 3 | 14 | 9  | 1 | 2 | 6 | 5 | 10 | 15 | 8  | 4 | 12 | 7  | 13 | 0 | 11 |  |
| 29 | XGB,<br>PI | {'colsample_bytree': 0.6, 'gamma': 0.5, 'max_depth': 2,<br>'min_child_weight': 5, 'random_state': 29, 'subsample': 0.6} | 0 | 14 | 6  | 3 | 4 | 7 | 2 | 8  | 13 | 10 | 5 | 11 | 9  | 12 | 1 | 16 |  |
| 30 | XGB,<br>PI | {'colsample_bytree': 0.6, 'gamma': 0.5, 'max_depth': 2,<br>'min_child_weight': 5, 'random_state': 30, 'subsample': 0.6} | 1 | 13 | 6  | 0 | 4 | 5 | 3 | 9  | 15 | 10 | 7 | 8  | 14 | 11 | 2 | 12 |  |
| 31 | XGB,<br>PI | {'colsample_bytree': 0.6, 'gamma': 0.5, 'max_depth': 2,<br>'min_child_weight': 5, 'random_state': 31, 'subsample': 0.6} | 0 | 13 | 4  | 3 | 6 | 5 | 2 | 9  | 14 | 10 | 7 | 16 | 8  | 11 | 1 | 12 |  |
| 32 | XGB,<br>PI | {'colsample_bytree': 0.6, 'gamma': 0.5, 'max_depth': 2,<br>'min_child_weight': 5, 'random_state': 32, 'subsample': 0.6} | 0 | 14 | 8  | 1 | 3 | 5 | 2 | 11 | 13 | 9  | 6 | 16 | 7  | 10 | 4 | 12 |  |
| 33 | XGB,<br>PI | {'colsample_bytree': 0.6, 'gamma': 0.5, 'max_depth': 2,<br>'min_child_weight': 5, 'random_state': 33, 'subsample': 0.6} | 0 | 13 | 7  | 1 | 5 | 4 | 2 | 10 | 14 | 11 | 6 | 12 | 8  | 15 | 3 | 9  |  |
| 34 | XGB,<br>PI | {'colsample_bytree': 0.6, 'gamma': 0.5, 'max_depth': 2,<br>'min_child_weight': 5, 'random_state': 34, 'subsample': 0.6} | 1 | 14 | 6  | 5 | 4 | 3 | 7 | 12 | 16 | 10 | 0 | 15 | 8  | 11 | 2 | 13 |  |
| 35 | XGB,<br>PI | {'colsample_bytree': 0.6, 'gamma': 0.5, 'max_depth': 2,<br>'min_child_weight': 5, 'random_state': 35, 'subsample': 0.6} | 0 | 16 | 6  | 2 | 3 | 5 | 4 | 9  | 13 | 10 | 8 | 11 | 7  | 14 | 1 | 12 |  |
| 36 | XGB,<br>PI | {'colsample_bytree': 0.6, 'gamma': 0.5, 'max_depth': 2,<br>'min_child_weight': 5, 'random_state': 36, 'subsample': 0.6} | 1 | 14 | 9  | 0 | 4 | 5 | 3 | 8  | 16 | 10 | 6 | 11 | 7  | 13 | 2 | 12 |  |
| 37 | XGB,<br>PI | {'colsample_bytree': 0.6, 'gamma': 0.5, 'max_depth': 2,<br>'min_child_weight': 5, 'random_state': 37, 'subsample': 0.6} | 1 | 12 | 7  | 0 | 4 | 3 | 6 | 9  | 16 | 10 | 2 | 11 | 8  | 14 | 5 | 13 |  |
| 38 | XGB,<br>PI | {'colsample_bytree': 0.6, 'gamma': 0.5, 'max_depth': 2,<br>'min_child_weight': 5, 'random_state': 38, 'subsample': 0.6} | 0 | 14 | 7  | 1 | 5 | 4 | 3 | 11 | 16 | 9  | 8 | 10 | 6  | 15 | 2 | 12 |  |

|    |            |                                                                                                                         |   |    |    |   |   |   |   |    |    |    |    |    |    |    |   |    |  |
|----|------------|-------------------------------------------------------------------------------------------------------------------------|---|----|----|---|---|---|---|----|----|----|----|----|----|----|---|----|--|
| 39 | XGB,<br>PI | {'colsample_bytree': 0.6, 'gamma': 0.5, 'max_depth': 2,<br>'min_child_weight': 5, 'random_state': 39, 'subsample': 0.6} | 1 | 11 | 7  | 0 | 6 | 4 | 3 | 10 | 14 | 8  | 5  | 12 | 9  | 13 | 2 | 15 |  |
| 40 | XGB,<br>PI | {'colsample_bytree': 0.6, 'gamma': 0.5, 'max_depth': 2,<br>'min_child_weight': 5, 'random_state': 40, 'subsample': 0.6} | 0 | 12 | 8  | 2 | 4 | 3 | 5 | 11 | 14 | 6  | 10 | 9  | 7  | 16 | 1 | 13 |  |
| 41 | XGB,<br>PI | {'colsample_bytree': 0.6, 'gamma': 0.5, 'max_depth': 2,<br>'min_child_weight': 5, 'random_state': 41, 'subsample': 0.6} | 2 | 15 | 6  | 1 | 7 | 4 | 3 | 10 | 16 | 8  | 5  | 11 | 9  | 14 | 0 | 12 |  |
| 42 | XGB,<br>PI | {'colsample_bytree': 0.6, 'gamma': 0.5, 'max_depth': 2,<br>'min_child_weight': 5, 'random_state': 42, 'subsample': 0.6} | 0 | 12 | 3  | 1 | 8 | 4 | 6 | 10 | 15 | 9  | 7  | 14 | 5  | 11 | 2 | 13 |  |
| 43 | XGB,<br>PI | {'colsample_bytree': 0.6, 'gamma': 0.5, 'max_depth': 2,<br>'min_child_weight': 5, 'random_state': 43, 'subsample': 0.6} | 0 | 13 | 7  | 2 | 4 | 6 | 5 | 11 | 15 | 8  | 9  | 16 | 3  | 10 | 1 | 14 |  |
| 44 | XGB,<br>PI | {'colsample_bytree': 0.6, 'gamma': 0.5, 'max_depth': 2,<br>'min_child_weight': 5, 'random_state': 44, 'subsample': 0.6} | 1 | 16 | 6  | 0 | 5 | 7 | 3 | 12 | 14 | 9  | 4  | 10 | 11 | 8  | 2 | 13 |  |
| 45 | XGB,<br>PI | {'colsample_bytree': 0.6, 'gamma': 0.5, 'max_depth': 2,<br>'min_child_weight': 5, 'random_state': 45, 'subsample': 0.6} | 5 | 13 | 9  | 0 | 4 | 2 | 8 | 7  | 16 | 10 | 6  | 12 | 3  | 11 | 1 | 15 |  |
| 46 | XGB,<br>PI | {'colsample_bytree': 0.6, 'gamma': 0.5, 'max_depth': 2,<br>'min_child_weight': 5, 'random_state': 46, 'subsample': 0.6} | 2 | 13 | 7  | 1 | 6 | 5 | 3 | 9  | 15 | 11 | 4  | 10 | 8  | 16 | 0 | 14 |  |
| 47 | XGB,<br>PI | {'colsample_bytree': 0.6, 'gamma': 0.5, 'max_depth': 2,<br>'min_child_weight': 5, 'random_state': 47, 'subsample': 0.6} | 2 | 13 | 6  | 0 | 3 | 7 | 4 | 10 | 15 | 11 | 8  | 14 | 5  | 12 | 1 | 9  |  |
| 48 | XGB,<br>PI | {'colsample_bytree': 0.6, 'gamma': 0.5, 'max_depth': 2,<br>'min_child_weight': 5, 'random_state': 48, 'subsample': 0.6} | 2 | 15 | 6  | 0 | 8 | 3 | 4 | 10 | 16 | 9  | 7  | 14 | 5  | 12 | 1 | 11 |  |
| 49 | XGB,<br>PI | {'colsample_bytree': 0.6, 'gamma': 0.5, 'max_depth': 2,<br>'min_child_weight': 5, 'random_state': 49, 'subsample': 0.6} | 1 | 10 | 11 | 0 | 5 | 3 | 4 | 8  | 14 | 7  | 6  | 15 | 9  | 13 | 2 | 12 |  |
| 50 | XGB,<br>PI | {'colsample_bytree': 0.6, 'gamma': 0.5, 'max_depth': 2,<br>'min_child_weight': 5, 'random_state': 50, 'subsample': 0.6} | 1 | 14 | 7  | 4 | 9 | 5 | 0 | 10 | 11 | 8  | 6  | 15 | 2  | 12 | 3 | 13 |  |
| 51 | XGB,<br>PI | {'colsample_bytree': 0.6, 'gamma': 0.5, 'max_depth': 2,<br>'min_child_weight': 5, 'random_state': 51, 'subsample': 0.6} | 1 | 14 | 9  | 0 | 4 | 8 | 5 | 6  | 13 | 11 | 3  | 12 | 10 | 16 | 2 | 7  |  |
| 52 | XGB,<br>PI | {'colsample_bytree': 0.6, 'gamma': 0.5, 'max_depth': 2,<br>'min_child_weight': 5, 'random_state': 52, 'subsample': 0.6} | 0 | 15 | 7  | 2 | 5 | 3 | 6 | 10 | 13 | 9  | 1  | 14 | 8  | 11 | 4 | 12 |  |
| 53 | XGB,<br>PI | {'colsample_bytree': 0.6, 'gamma': 0.5, 'max_depth': 2,<br>'min_child_weight': 5, 'random_state': 53, 'subsample': 0.6} | 1 | 13 | 8  | 0 | 7 | 4 | 5 | 11 | 16 | 9  | 3  | 12 | 6  | 10 | 2 | 15 |  |

|    |            |                                                                                                                         |   |    |    |   |   |   |   |    |    |    |    |    |    |    |   |    |  |
|----|------------|-------------------------------------------------------------------------------------------------------------------------|---|----|----|---|---|---|---|----|----|----|----|----|----|----|---|----|--|
| 54 | XGB,<br>PI | {'colsample_bytree': 0.6, 'gamma': 0.5, 'max_depth': 2,<br>'min_child_weight': 5, 'random_state': 54, 'subsample': 0.6} | 1 | 13 | 8  | 0 | 4 | 5 | 3 | 7  | 15 | 10 | 6  | 16 | 9  | 11 | 2 | 14 |  |
| 55 | XGB,<br>PI | {'colsample_bytree': 0.6, 'gamma': 0.5, 'max_depth': 2,<br>'min_child_weight': 5, 'random_state': 55, 'subsample': 0.6} | 2 | 13 | 7  | 5 | 1 | 4 | 3 | 9  | 12 | 10 | 6  | 11 | 8  | 14 | 0 | 16 |  |
| 56 | XGB,<br>PI | {'colsample_bytree': 0.6, 'gamma': 0.5, 'max_depth': 2,<br>'min_child_weight': 5, 'random_state': 56, 'subsample': 0.6} | 5 | 16 | 9  | 1 | 3 | 4 | 6 | 10 | 12 | 7  | 2  | 11 | 8  | 13 | 0 | 15 |  |
| 57 | XGB,<br>PI | {'colsample_bytree': 0.6, 'gamma': 0.5, 'max_depth': 2,<br>'min_child_weight': 5, 'random_state': 57, 'subsample': 0.6} | 0 | 12 | 9  | 3 | 4 | 5 | 6 | 10 | 16 | 8  | 7  | 11 | 1  | 14 | 2 | 13 |  |
| 58 | XGB,<br>PI | {'colsample_bytree': 0.6, 'gamma': 0.5, 'max_depth': 2,<br>'min_child_weight': 5, 'random_state': 58, 'subsample': 0.6} | 0 | 13 | 10 | 1 | 4 | 3 | 5 | 9  | 14 | 7  | 6  | 15 | 8  | 11 | 2 | 16 |  |
| 59 | XGB,<br>PI | {'colsample_bytree': 0.6, 'gamma': 0.5, 'max_depth': 2,<br>'min_child_weight': 5, 'random_state': 59, 'subsample': 0.6} | 0 | 13 | 9  | 2 | 5 | 1 | 4 | 6  | 14 | 10 | 7  | 11 | 8  | 12 | 3 | 15 |  |
| 60 | XGB,<br>PI | {'colsample_bytree': 0.6, 'gamma': 0.5, 'max_depth': 2,<br>'min_child_weight': 5, 'random_state': 60, 'subsample': 0.6} | 1 | 11 | 7  | 3 | 4 | 6 | 2 | 9  | 16 | 5  | 10 | 13 | 8  | 14 | 0 | 12 |  |
| 61 | XGB,<br>PI | {'colsample_bytree': 0.6, 'gamma': 0.5, 'max_depth': 2,<br>'min_child_weight': 5, 'random_state': 61, 'subsample': 0.6} | 0 | 13 | 3  | 1 | 4 | 6 | 5 | 11 | 14 | 9  | 7  | 15 | 8  | 16 | 2 | 10 |  |
| 62 | XGB,<br>PI | {'colsample_bytree': 0.6, 'gamma': 0.5, 'max_depth': 2,<br>'min_child_weight': 5, 'random_state': 62, 'subsample': 0.6} | 0 | 14 | 7  | 1 | 5 | 4 | 3 | 13 | 15 | 8  | 6  | 10 | 9  | 11 | 2 | 12 |  |
| 63 | XGB,<br>PI | {'colsample_bytree': 0.6, 'gamma': 0.5, 'max_depth': 2,<br>'min_child_weight': 5, 'random_state': 63, 'subsample': 0.6} | 1 | 14 | 8  | 0 | 7 | 4 | 3 | 6  | 16 | 9  | 5  | 11 | 10 | 12 | 2 | 15 |  |
| 64 | XGB,<br>PI | {'colsample_bytree': 0.6, 'gamma': 0.5, 'max_depth': 2,<br>'min_child_weight': 5, 'random_state': 64, 'subsample': 0.6} | 1 | 13 | 8  | 0 | 5 | 4 | 6 | 11 | 12 | 7  | 9  | 15 | 3  | 14 | 2 | 10 |  |
| 65 | XGB,<br>PI | {'colsample_bytree': 0.6, 'gamma': 0.5, 'max_depth': 2,<br>'min_child_weight': 5, 'random_state': 65, 'subsample': 0.6} | 0 | 13 | 8  | 1 | 4 | 6 | 7 | 11 | 15 | 9  | 2  | 10 | 5  | 16 | 3 | 14 |  |
| 66 | XGB,<br>PI | {'colsample_bytree': 0.6, 'gamma': 0.5, 'max_depth': 2,<br>'min_child_weight': 5, 'random_state': 66, 'subsample': 0.6} | 0 | 11 | 6  | 1 | 4 | 7 | 2 | 8  | 15 | 10 | 3  | 9  | 13 | 14 | 5 | 12 |  |
| 67 | XGB,<br>PI | {'colsample_bytree': 0.6, 'gamma': 0.5, 'max_depth': 2,<br>'min_child_weight': 5, 'random_state': 67, 'subsample': 0.6} | 0 | 12 | 8  | 2 | 6 | 3 | 5 | 11 | 15 | 7  | 9  | 13 | 4  | 16 | 1 | 14 |  |
| 68 | XGB,<br>PI | {'colsample_bytree': 0.6, 'gamma': 0.5, 'max_depth': 2,<br>'min_child_weight': 5, 'random_state': 68, 'subsample': 0.6} | 1 | 12 | 7  | 0 | 5 | 6 | 4 | 10 | 14 | 9  | 3  | 8  | 11 | 15 | 2 | 16 |  |



|    |            |                                                                                                                         |   |    |    |   |   |   |   |    |    |    |    |    |    |    |   |    |  |
|----|------------|-------------------------------------------------------------------------------------------------------------------------|---|----|----|---|---|---|---|----|----|----|----|----|----|----|---|----|--|
| 69 | XGB,<br>PI | {'colsample_bytree': 0.6, 'gamma': 0.5, 'max_depth': 2,<br>'min_child_weight': 5, 'random_state': 69, 'subsample': 0.6} | 0 | 12 | 6  | 1 | 5 | 4 | 2 | 8  | 15 | 9  | 10 | 16 | 7  | 13 | 3 | 11 |  |
| 70 | XGB,<br>PI | {'colsample_bytree': 0.6, 'gamma': 0.5, 'max_depth': 2,<br>'min_child_weight': 5, 'random_state': 70, 'subsample': 0.6} | 1 | 16 | 7  | 3 | 6 | 2 | 4 | 12 | 11 | 8  | 5  | 9  | 10 | 13 | 0 | 14 |  |
| 71 | XGB,<br>PI | {'colsample_bytree': 0.6, 'gamma': 0.5, 'max_depth': 2,<br>'min_child_weight': 5, 'random_state': 71, 'subsample': 0.6} | 1 | 13 | 8  | 0 | 4 | 5 | 7 | 9  | 16 | 10 | 3  | 11 | 6  | 14 | 2 | 12 |  |
| 72 | XGB,<br>PI | {'colsample_bytree': 0.6, 'gamma': 0.5, 'max_depth': 2,<br>'min_child_weight': 5, 'random_state': 72, 'subsample': 0.6} | 0 | 13 | 5  | 1 | 6 | 2 | 4 | 8  | 16 | 9  | 7  | 14 | 10 | 12 | 3 | 11 |  |
| 73 | XGB,<br>PI | {'colsample_bytree': 0.6, 'gamma': 0.5, 'max_depth': 2,<br>'min_child_weight': 5, 'random_state': 73, 'subsample': 0.6} | 1 | 14 | 8  | 6 | 3 | 5 | 2 | 9  | 11 | 10 | 4  | 12 | 7  | 16 | 0 | 15 |  |
| 74 | XGB,<br>PI | {'colsample_bytree': 0.6, 'gamma': 0.5, 'max_depth': 2,<br>'min_child_weight': 5, 'random_state': 74, 'subsample': 0.6} | 0 | 12 | 7  | 2 | 1 | 6 | 4 | 11 | 10 | 9  | 5  | 13 | 8  | 14 | 3 | 16 |  |
| 75 | XGB,<br>PI | {'colsample_bytree': 0.6, 'gamma': 0.5, 'max_depth': 2,<br>'min_child_weight': 5, 'random_state': 75, 'subsample': 0.6} | 1 | 15 | 5  | 0 | 4 | 6 | 8 | 10 | 16 | 9  | 3  | 14 | 7  | 11 | 2 | 12 |  |
| 76 | XGB,<br>PI | {'colsample_bytree': 0.6, 'gamma': 0.5, 'max_depth': 2,<br>'min_child_weight': 5, 'random_state': 76, 'subsample': 0.6} | 0 | 12 | 9  | 1 | 2 | 4 | 6 | 10 | 14 | 8  | 7  | 16 | 3  | 11 | 5 | 13 |  |
| 77 | XGB,<br>PI | {'colsample_bytree': 0.6, 'gamma': 0.5, 'max_depth': 2,<br>'min_child_weight': 5, 'random_state': 77, 'subsample': 0.6} | 3 | 16 | 8  | 2 | 6 | 4 | 5 | 10 | 14 | 9  | 1  | 15 | 7  | 12 | 0 | 11 |  |
| 78 | XGB,<br>PI | {'colsample_bytree': 0.6, 'gamma': 0.5, 'max_depth': 2,<br>'min_child_weight': 5, 'random_state': 78, 'subsample': 0.6} | 0 | 15 | 5  | 2 | 9 | 4 | 6 | 10 | 16 | 7  | 3  | 14 | 8  | 11 | 1 | 12 |  |
| 79 | XGB,<br>PI | {'colsample_bytree': 0.6, 'gamma': 0.5, 'max_depth': 2,<br>'min_child_weight': 5, 'random_state': 79, 'subsample': 0.6} | 1 | 15 | 6  | 2 | 4 | 5 | 3 | 10 | 13 | 9  | 8  | 16 | 7  | 14 | 0 | 11 |  |
| 80 | XGB,<br>PI | {'colsample_bytree': 0.6, 'gamma': 0.5, 'max_depth': 2,<br>'min_child_weight': 5, 'random_state': 80, 'subsample': 0.6} | 0 | 14 | 7  | 2 | 3 | 5 | 6 | 10 | 15 | 8  | 4  | 13 | 9  | 12 | 1 | 11 |  |
| 81 | XGB,<br>PI | {'colsample_bytree': 0.6, 'gamma': 0.5, 'max_depth': 2,<br>'min_child_weight': 5, 'random_state': 81, 'subsample': 0.6} | 0 | 14 | 9  | 1 | 5 | 2 | 4 | 8  | 16 | 3  | 7  | 10 | 12 | 13 | 6 | 11 |  |
| 82 | XGB,<br>PI | {'colsample_bytree': 0.6, 'gamma': 0.5, 'max_depth': 2,<br>'min_child_weight': 5, 'random_state': 82, 'subsample': 0.6} | 1 | 14 | 10 | 2 | 3 | 4 | 6 | 9  | 13 | 12 | 7  | 8  | 5  | 16 | 0 | 11 |  |
| 83 | XGB,<br>PI | {'colsample_bytree': 0.6, 'gamma': 0.5, 'max_depth': 2,<br>'min_child_weight': 5, 'random_state': 83, 'subsample': 0.6} | 0 | 16 | 5  | 1 | 8 | 4 | 3 | 10 | 12 | 6  | 11 | 9  | 7  | 14 | 2 | 15 |  |

|    |            |                                                                                                                         |   |    |    |   |   |   |   |    |    |    |   |    |    |    |   |    |  |
|----|------------|-------------------------------------------------------------------------------------------------------------------------|---|----|----|---|---|---|---|----|----|----|---|----|----|----|---|----|--|
| 84 | XGB,<br>PI | {'colsample_bytree': 0.6, 'gamma': 0.5, 'max_depth': 2,<br>'min_child_weight': 5, 'random_state': 84, 'subsample': 0.6} | 0 | 16 | 8  | 1 | 6 | 3 | 4 | 10 | 14 | 7  | 5 | 9  | 11 | 12 | 2 | 13 |  |
| 85 | XGB,<br>PI | {'colsample_bytree': 0.6, 'gamma': 0.5, 'max_depth': 2,<br>'min_child_weight': 5, 'random_state': 85, 'subsample': 0.6} | 2 | 10 | 8  | 1 | 3 | 4 | 5 | 12 | 13 | 7  | 6 | 9  | 11 | 15 | 0 | 16 |  |
| 86 | XGB,<br>PI | {'colsample_bytree': 0.6, 'gamma': 0.5, 'max_depth': 2,<br>'min_child_weight': 5, 'random_state': 86, 'subsample': 0.6} | 0 | 15 | 6  | 1 | 7 | 4 | 5 | 9  | 14 | 12 | 3 | 13 | 8  | 11 | 2 | 10 |  |
| 87 | XGB,<br>PI | {'colsample_bytree': 0.6, 'gamma': 0.5, 'max_depth': 2,<br>'min_child_weight': 5, 'random_state': 87, 'subsample': 0.6} | 0 | 15 | 6  | 2 | 9 | 5 | 4 | 8  | 16 | 7  | 3 | 12 | 11 | 13 | 1 | 10 |  |
| 88 | XGB,<br>PI | {'colsample_bytree': 0.6, 'gamma': 0.5, 'max_depth': 2,<br>'min_child_weight': 5, 'random_state': 88, 'subsample': 0.6} | 0 | 16 | 8  | 1 | 5 | 3 | 4 | 11 | 15 | 9  | 7 | 12 | 6  | 14 | 2 | 13 |  |
| 89 | XGB,<br>PI | {'colsample_bytree': 0.6, 'gamma': 0.5, 'max_depth': 2,<br>'min_child_weight': 5, 'random_state': 89, 'subsample': 0.6} | 0 | 15 | 6  | 1 | 5 | 7 | 4 | 10 | 13 | 8  | 9 | 14 | 3  | 12 | 2 | 11 |  |
| 90 | XGB,<br>PI | {'colsample_bytree': 0.6, 'gamma': 0.5, 'max_depth': 2,<br>'min_child_weight': 5, 'random_state': 90, 'subsample': 0.6} | 0 | 14 | 6  | 1 | 3 | 9 | 5 | 8  | 16 | 10 | 4 | 7  | 11 | 13 | 2 | 12 |  |
| 91 | XGB,<br>PI | {'colsample_bytree': 0.6, 'gamma': 0.5, 'max_depth': 2,<br>'min_child_weight': 5, 'random_state': 91, 'subsample': 0.6} | 0 | 16 | 8  | 1 | 5 | 3 | 4 | 9  | 14 | 12 | 6 | 11 | 7  | 13 | 2 | 10 |  |
| 92 | XGB,<br>PI | {'colsample_bytree': 0.6, 'gamma': 0.5, 'max_depth': 2,<br>'min_child_weight': 5, 'random_state': 92, 'subsample': 0.6} | 1 | 15 | 2  | 5 | 7 | 4 | 3 | 10 | 16 | 9  | 6 | 12 | 8  | 11 | 0 | 14 |  |
| 93 | XGB,<br>PI | {'colsample_bytree': 0.6, 'gamma': 0.5, 'max_depth': 2,<br>'min_child_weight': 5, 'random_state': 93, 'subsample': 0.6} | 1 | 12 | 7  | 0 | 5 | 6 | 4 | 9  | 16 | 8  | 3 | 11 | 10 | 14 | 2 | 13 |  |
| 94 | XGB,<br>PI | {'colsample_bytree': 0.6, 'gamma': 0.5, 'max_depth': 2,<br>'min_child_weight': 5, 'random_state': 94, 'subsample': 0.6} | 0 | 16 | 4  | 1 | 2 | 5 | 3 | 8  | 15 | 12 | 6 | 10 | 9  | 11 | 7 | 13 |  |
| 95 | XGB,<br>PI | {'colsample_bytree': 0.6, 'gamma': 0.5, 'max_depth': 2,<br>'min_child_weight': 5, 'random_state': 95, 'subsample': 0.6} | 1 | 9  | 11 | 0 | 4 | 6 | 5 | 8  | 16 | 7  | 3 | 13 | 10 | 12 | 2 | 15 |  |
| 96 | XGB,<br>PI | {'colsample_bytree': 0.6, 'gamma': 0.5, 'max_depth': 2,<br>'min_child_weight': 5, 'random_state': 96, 'subsample': 0.6} | 0 | 10 | 7  | 3 | 5 | 6 | 4 | 15 | 14 | 8  | 2 | 12 | 9  | 16 | 1 | 11 |  |
| 97 | XGB,<br>PI | {'colsample_bytree': 0.6, 'gamma': 0.5, 'max_depth': 2,<br>'min_child_weight': 5, 'random_state': 97, 'subsample': 0.6} | 1 | 15 | 8  | 0 | 5 | 6 | 2 | 9  | 14 | 7  | 4 | 12 | 10 | 11 | 3 | 16 |  |
| 98 | XGB,<br>PI | {'colsample_bytree': 0.6, 'gamma': 0.5, 'max_depth': 2,<br>'min_child_weight': 5, 'random_state': 98, 'subsample': 0.6} | 1 | 12 | 9  | 0 | 5 | 4 | 3 | 8  | 13 | 10 | 6 | 7  | 14 | 16 | 2 | 11 |  |

|    |             |                                                                                                                         |    |    |    |    |    |    |    |    |    |    |    |    |    |    |    |    |  |
|----|-------------|-------------------------------------------------------------------------------------------------------------------------|----|----|----|----|----|----|----|----|----|----|----|----|----|----|----|----|--|
| 99 | XGB,<br>PI  | {'colsample_bytree': 0.6, 'gamma': 0.5, 'max_depth': 2,<br>'min_child_weight': 5, 'random_state': 99, 'subsample': 0.6} | 0  | 12 | 10 | 2  | 4  | 3  | 6  | 8  | 16 | 9  | 7  | 11 | 5  | 13 | 1  | 15 |  |
| 0  | XGB,<br>RFE | {'colsample_bytree': 0.6, 'gamma': 0.5, 'max_depth': 2,<br>'min_child_weight': 5, 'random_state': 0, 'subsample': 0.6}  | 4  | 17 | 11 | 12 | 10 | 8  | 2  | 14 | 15 | 9  | 1  | 13 | 6  | 16 | 3  | 7  |  |
| 1  | XGB,<br>RFE | {'colsample_bytree': 0.6, 'gamma': 0.5, 'max_depth': 2,<br>'min_child_weight': 5, 'random_state': 1, 'subsample': 0.6}  | 1  | 15 | 13 | 4  | 9  | 16 | 12 | 10 | 14 | 3  | 8  | 11 | 5  | 17 | 6  | 2  |  |
| 2  | XGB,<br>RFE | {'colsample_bytree': 0.6, 'gamma': 0.5, 'max_depth': 2,<br>'min_child_weight': 5, 'random_state': 2, 'subsample': 0.6}  | 12 | 13 | 6  | 8  | 9  | 4  | 7  | 5  | 17 | 11 | 2  | 16 | 10 | 15 | 3  | 1  |  |
| 3  | XGB,<br>RFE | {'colsample_bytree': 0.6, 'gamma': 0.5, 'max_depth': 2,<br>'min_child_weight': 5, 'random_state': 3, 'subsample': 0.6}  | 3  | 17 | 8  | 4  | 12 | 7  | 10 | 5  | 6  | 14 | 13 | 9  | 11 | 15 | 1  | 2  |  |
| 4  | XGB,<br>RFE | {'colsample_bytree': 0.6, 'gamma': 0.5, 'max_depth': 2,<br>'min_child_weight': 5, 'random_state': 4, 'subsample': 0.6}  | 1  | 14 | 6  | 5  | 12 | 3  | 11 | 10 | 17 | 15 | 8  | 7  | 13 | 16 | 9  | 4  |  |
| 5  | XGB,<br>RFE | {'colsample_bytree': 0.6, 'gamma': 0.5, 'max_depth': 2,<br>'min_child_weight': 5, 'random_state': 5, 'subsample': 0.6}  | 4  | 12 | 15 | 10 | 14 | 2  | 6  | 9  | 13 | 1  | 5  | 11 | 7  | 17 | 8  | 16 |  |
| 6  | XGB,<br>RFE | {'colsample_bytree': 0.6, 'gamma': 0.5, 'max_depth': 2,<br>'min_child_weight': 5, 'random_state': 6, 'subsample': 0.6}  | 7  | 13 | 16 | 8  | 3  | 6  | 11 | 10 | 4  | 1  | 5  | 14 | 9  | 15 | 12 | 2  |  |
| 7  | XGB,<br>RFE | {'colsample_bytree': 0.6, 'gamma': 0.5, 'max_depth': 2,<br>'min_child_weight': 5, 'random_state': 7, 'subsample': 0.6}  | 3  | 8  | 14 | 2  | 15 | 6  | 9  | 5  | 16 | 10 | 7  | 17 | 4  | 11 | 12 | 1  |  |
| 8  | XGB,<br>RFE | {'colsample_bytree': 0.6, 'gamma': 0.5, 'max_depth': 2,<br>'min_child_weight': 5, 'random_state': 8, 'subsample': 0.6}  | 4  | 14 | 15 | 6  | 5  | 7  | 9  | 17 | 12 | 10 | 1  | 2  | 8  | 13 | 16 | 3  |  |
| 9  | XGB,<br>RFE | {'colsample_bytree': 0.6, 'gamma': 0.5, 'max_depth': 2,<br>'min_child_weight': 5, 'random_state': 9, 'subsample': 0.6}  | 7  | 17 | 11 | 12 | 5  | 13 | 10 | 6  | 8  | 15 | 2  | 1  | 14 | 16 | 4  | 3  |  |
| 10 | XGB,<br>RFE | {'colsample_bytree': 0.6, 'gamma': 0.5, 'max_depth': 2,<br>'min_child_weight': 5, 'random_state': 10, 'subsample': 0.6} | 8  | 16 | 11 | 1  | 12 | 7  | 4  | 6  | 13 | 15 | 3  | 14 | 9  | 17 | 5  | 2  |  |
| 11 | XGB,<br>RFE | {'colsample_bytree': 0.6, 'gamma': 0.5, 'max_depth': 2,<br>'min_child_weight': 5, 'random_state': 11, 'subsample': 0.6} | 2  | 9  | 14 | 5  | 8  | 12 | 11 | 4  | 16 | 17 | 1  | 7  | 13 | 10 | 6  | 3  |  |
| 12 | XGB,<br>RFE | {'colsample_bytree': 0.6, 'gamma': 0.5, 'max_depth': 2,<br>'min_child_weight': 5, 'random_state': 12, 'subsample': 0.6} | 1  | 17 | 7  | 3  | 4  | 9  | 8  | 15 | 14 | 12 | 11 | 10 | 5  | 13 | 6  | 2  |  |
| 13 | XGB,<br>RFE | {'colsample_bytree': 0.6, 'gamma': 0.5, 'max_depth': 2,<br>'min_child_weight': 5, 'random_state': 13, 'subsample': 0.6} | 11 | 16 | 13 | 4  | 3  | 8  | 5  | 9  | 17 | 12 | 2  | 1  | 6  | 14 | 7  | 15 |  |

|    |             |                                                                                                                         |    |    |    |    |    |    |    |    |    |    |   |    |    |    |    |    |  |
|----|-------------|-------------------------------------------------------------------------------------------------------------------------|----|----|----|----|----|----|----|----|----|----|---|----|----|----|----|----|--|
| 14 | XGB,<br>RFE | {'colsample_bytree': 0.6, 'gamma': 0.5, 'max_depth': 2,<br>'min_child_weight': 5, 'random_state': 14, 'subsample': 0.6} | 9  | 14 | 12 | 4  | 2  | 5  | 11 | 10 | 13 | 17 | 6 | 16 | 1  | 15 | 8  | 3  |  |
| 15 | XGB,<br>RFE | {'colsample_bytree': 0.6, 'gamma': 0.5, 'max_depth': 2,<br>'min_child_weight': 5, 'random_state': 15, 'subsample': 0.6} | 7  | 10 | 15 | 6  | 9  | 3  | 13 | 8  | 11 | 12 | 4 | 14 | 2  | 16 | 1  | 17 |  |
| 16 | XGB,<br>RFE | {'colsample_bytree': 0.6, 'gamma': 0.5, 'max_depth': 2,<br>'min_child_weight': 5, 'random_state': 16, 'subsample': 0.6} | 4  | 16 | 5  | 3  | 9  | 10 | 13 | 6  | 15 | 17 | 8 | 7  | 1  | 14 | 12 | 2  |  |
| 17 | XGB,<br>RFE | {'colsample_bytree': 0.6, 'gamma': 0.5, 'max_depth': 2,<br>'min_child_weight': 5, 'random_state': 17, 'subsample': 0.6} | 1  | 17 | 15 | 10 | 2  | 3  | 7  | 6  | 13 | 14 | 4 | 16 | 8  | 12 | 5  | 11 |  |
| 18 | XGB,<br>RFE | {'colsample_bytree': 0.6, 'gamma': 0.5, 'max_depth': 2,<br>'min_child_weight': 5, 'random_state': 18, 'subsample': 0.6} | 1  | 16 | 12 | 6  | 5  | 4  | 2  | 14 | 15 | 10 | 8 | 13 | 11 | 17 | 9  | 3  |  |
| 19 | XGB,<br>RFE | {'colsample_bytree': 0.6, 'gamma': 0.5, 'max_depth': 2,<br>'min_child_weight': 5, 'random_state': 19, 'subsample': 0.6} | 15 | 17 | 14 | 5  | 3  | 6  | 4  | 9  | 10 | 8  | 2 | 13 | 7  | 12 | 11 | 1  |  |
| 20 | XGB,<br>RFE | {'colsample_bytree': 0.6, 'gamma': 0.5, 'max_depth': 2,<br>'min_child_weight': 5, 'random_state': 20, 'subsample': 0.6} | 3  | 14 | 8  | 6  | 4  | 12 | 10 | 7  | 16 | 11 | 2 | 15 | 9  | 17 | 5  | 1  |  |
| 21 | XGB,<br>RFE | {'colsample_bytree': 0.6, 'gamma': 0.5, 'max_depth': 2,<br>'min_child_weight': 5, 'random_state': 21, 'subsample': 0.6} | 4  | 12 | 15 | 2  | 7  | 10 | 6  | 8  | 16 | 11 | 1 | 5  | 9  | 14 | 13 | 3  |  |
| 22 | XGB,<br>RFE | {'colsample_bytree': 0.6, 'gamma': 0.5, 'max_depth': 2,<br>'min_child_weight': 5, 'random_state': 22, 'subsample': 0.6} | 1  | 13 | 15 | 3  | 4  | 5  | 11 | 16 | 14 | 12 | 7 | 9  | 8  | 17 | 10 | 2  |  |
| 23 | XGB,<br>RFE | {'colsample_bytree': 0.6, 'gamma': 0.5, 'max_depth': 2,<br>'min_child_weight': 5, 'random_state': 23, 'subsample': 0.6} | 1  | 16 | 13 | 8  | 5  | 11 | 9  | 6  | 15 | 12 | 4 | 3  | 7  | 17 | 10 | 2  |  |
| 24 | XGB,<br>RFE | {'colsample_bytree': 0.6, 'gamma': 0.5, 'max_depth': 2,<br>'min_child_weight': 5, 'random_state': 24, 'subsample': 0.6} | 7  | 15 | 14 | 5  | 8  | 1  | 10 | 11 | 17 | 3  | 2 | 12 | 4  | 13 | 9  | 16 |  |
| 25 | XGB,<br>RFE | {'colsample_bytree': 0.6, 'gamma': 0.5, 'max_depth': 2,<br>'min_child_weight': 5, 'random_state': 25, 'subsample': 0.6} | 1  | 15 | 11 | 10 | 2  | 8  | 12 | 7  | 16 | 6  | 9 | 14 | 5  | 17 | 4  | 3  |  |
| 26 | XGB,<br>RFE | {'colsample_bytree': 0.6, 'gamma': 0.5, 'max_depth': 2,<br>'min_child_weight': 5, 'random_state': 26, 'subsample': 0.6} | 1  | 17 | 9  | 3  | 5  | 10 | 4  | 13 | 15 | 8  | 6 | 14 | 7  | 11 | 12 | 2  |  |
| 27 | XGB,<br>RFE | {'colsample_bytree': 0.6, 'gamma': 0.5, 'max_depth': 2,<br>'min_child_weight': 5, 'random_state': 27, 'subsample': 0.6} | 4  | 12 | 17 | 2  | 15 | 5  | 10 | 9  | 16 | 11 | 6 | 14 | 3  | 13 | 7  | 1  |  |
| 28 | XGB,<br>RFE | {'colsample_bytree': 0.6, 'gamma': 0.5, 'max_depth': 2,<br>'min_child_weight': 5, 'random_state': 28, 'subsample': 0.6} | 3  | 17 | 16 | 2  | 7  | 10 | 4  | 15 | 13 | 1  | 8 | 11 | 6  | 14 | 9  | 5  |  |

|    |             |                                                                                                                         |    |    |    |    |    |    |    |    |    |    |    |    |    |    |    |    |  |
|----|-------------|-------------------------------------------------------------------------------------------------------------------------|----|----|----|----|----|----|----|----|----|----|----|----|----|----|----|----|--|
| 29 | XGB,<br>RFE | {'colsample_bytree': 0.6, 'gamma': 0.5, 'max_depth': 2,<br>'min_child_weight': 5, 'random_state': 29, 'subsample': 0.6} | 1  | 14 | 9  | 2  | 4  | 16 | 6  | 10 | 17 | 8  | 12 | 13 | 5  | 15 | 7  | 3  |  |
| 30 | XGB,<br>RFE | {'colsample_bytree': 0.6, 'gamma': 0.5, 'max_depth': 2,<br>'min_child_weight': 5, 'random_state': 30, 'subsample': 0.6} | 3  | 14 | 12 | 10 | 7  | 9  | 6  | 8  | 11 | 5  | 1  | 2  | 15 | 16 | 4  | 13 |  |
| 31 | XGB,<br>RFE | {'colsample_bytree': 0.6, 'gamma': 0.5, 'max_depth': 2,<br>'min_child_weight': 5, 'random_state': 31, 'subsample': 0.6} | 10 | 15 | 7  | 9  | 8  | 13 | 1  | 3  | 12 | 16 | 4  | 17 | 5  | 11 | 6  | 2  |  |
| 32 | XGB,<br>RFE | {'colsample_bytree': 0.6, 'gamma': 0.5, 'max_depth': 2,<br>'min_child_weight': 5, 'random_state': 32, 'subsample': 0.6} | 3  | 17 | 15 | 5  | 1  | 8  | 10 | 13 | 14 | 9  | 4  | 7  | 6  | 12 | 11 | 2  |  |
| 33 | XGB,<br>RFE | {'colsample_bytree': 0.6, 'gamma': 0.5, 'max_depth': 2,<br>'min_child_weight': 5, 'random_state': 33, 'subsample': 0.6} | 6  | 15 | 13 | 3  | 7  | 12 | 1  | 9  | 10 | 5  | 4  | 11 | 8  | 17 | 14 | 2  |  |
| 34 | XGB,<br>RFE | {'colsample_bytree': 0.6, 'gamma': 0.5, 'max_depth': 2,<br>'min_child_weight': 5, 'random_state': 34, 'subsample': 0.6} | 12 | 14 | 6  | 7  | 2  | 15 | 5  | 13 | 17 | 10 | 1  | 8  | 16 | 11 | 3  | 4  |  |
| 35 | XGB,<br>RFE | {'colsample_bytree': 0.6, 'gamma': 0.5, 'max_depth': 2,<br>'min_child_weight': 5, 'random_state': 35, 'subsample': 0.6} | 11 | 15 | 17 | 4  | 2  | 7  | 6  | 10 | 16 | 9  | 1  | 5  | 13 | 12 | 14 | 3  |  |
| 36 | XGB,<br>RFE | {'colsample_bytree': 0.6, 'gamma': 0.5, 'max_depth': 2,<br>'min_child_weight': 5, 'random_state': 36, 'subsample': 0.6} | 8  | 15 | 13 | 5  | 7  | 10 | 2  | 14 | 17 | 6  | 1  | 16 | 4  | 12 | 3  | 11 |  |
| 37 | XGB,<br>RFE | {'colsample_bytree': 0.6, 'gamma': 0.5, 'max_depth': 2,<br>'min_child_weight': 5, 'random_state': 37, 'subsample': 0.6} | 9  | 16 | 13 | 4  | 10 | 5  | 7  | 3  | 17 | 11 | 1  | 15 | 6  | 14 | 12 | 2  |  |
| 38 | XGB,<br>RFE | {'colsample_bytree': 0.6, 'gamma': 0.5, 'max_depth': 2,<br>'min_child_weight': 5, 'random_state': 38, 'subsample': 0.6} | 2  | 14 | 15 | 5  | 1  | 9  | 6  | 13 | 16 | 4  | 8  | 11 | 3  | 17 | 10 | 12 |  |
| 39 | XGB,<br>RFE | {'colsample_bytree': 0.6, 'gamma': 0.5, 'max_depth': 2,<br>'min_child_weight': 5, 'random_state': 39, 'subsample': 0.6} | 5  | 16 | 12 | 2  | 11 | 7  | 13 | 14 | 15 | 10 | 3  | 9  | 6  | 17 | 4  | 1  |  |
| 40 | XGB,<br>RFE | {'colsample_bytree': 0.6, 'gamma': 0.5, 'max_depth': 2,<br>'min_child_weight': 5, 'random_state': 40, 'subsample': 0.6} | 2  | 16 | 5  | 13 | 3  | 10 | 6  | 14 | 15 | 7  | 1  | 4  | 11 | 17 | 9  | 12 |  |
| 41 | XGB,<br>RFE | {'colsample_bytree': 0.6, 'gamma': 0.5, 'max_depth': 2,<br>'min_child_weight': 5, 'random_state': 41, 'subsample': 0.6} | 3  | 13 | 10 | 7  | 4  | 12 | 2  | 11 | 15 | 6  | 1  | 5  | 14 | 17 | 9  | 16 |  |
| 42 | XGB,<br>RFE | {'colsample_bytree': 0.6, 'gamma': 0.5, 'max_depth': 2,<br>'min_child_weight': 5, 'random_state': 42, 'subsample': 0.6} | 13 | 16 | 15 | 1  | 12 | 5  | 11 | 4  | 14 | 10 | 6  | 3  | 8  | 17 | 7  | 2  |  |
| 43 | XGB,<br>RFE | {'colsample_bytree': 0.6, 'gamma': 0.5, 'max_depth': 2,<br>'min_child_weight': 5, 'random_state': 43, 'subsample': 0.6} | 3  | 17 | 13 | 12 | 5  | 10 | 7  | 9  | 4  | 14 | 1  | 16 | 6  | 15 | 8  | 2  |  |

|    |             |                                                                                                                         |    |    |    |   |    |    |    |    |    |    |    |    |    |    |    |    |  |
|----|-------------|-------------------------------------------------------------------------------------------------------------------------|----|----|----|---|----|----|----|----|----|----|----|----|----|----|----|----|--|
| 44 | XGB,<br>RFE | {'colsample_bytree': 0.6, 'gamma': 0.5, 'max_depth': 2,<br>'min_child_weight': 5, 'random_state': 44, 'subsample': 0.6} | 5  | 17 | 10 | 6 | 1  | 13 | 9  | 3  | 16 | 2  | 7  | 4  | 15 | 12 | 11 | 14 |  |
| 45 | XGB,<br>RFE | {'colsample_bytree': 0.6, 'gamma': 0.5, 'max_depth': 2,<br>'min_child_weight': 5, 'random_state': 45, 'subsample': 0.6} | 4  | 2  | 14 | 5 | 8  | 10 | 7  | 13 | 16 | 15 | 1  | 17 | 6  | 11 | 9  | 12 |  |
| 46 | XGB,<br>RFE | {'colsample_bytree': 0.6, 'gamma': 0.5, 'max_depth': 2,<br>'min_child_weight': 5, 'random_state': 46, 'subsample': 0.6} | 3  | 12 | 17 | 6 | 8  | 5  | 14 | 15 | 16 | 7  | 1  | 9  | 13 | 11 | 4  | 2  |  |
| 47 | XGB,<br>RFE | {'colsample_bytree': 0.6, 'gamma': 0.5, 'max_depth': 2,<br>'min_child_weight': 5, 'random_state': 47, 'subsample': 0.6} | 7  | 16 | 11 | 4 | 5  | 10 | 2  | 13 | 17 | 9  | 6  | 1  | 15 | 14 | 8  | 3  |  |
| 48 | XGB,<br>RFE | {'colsample_bytree': 0.6, 'gamma': 0.5, 'max_depth': 2,<br>'min_child_weight': 5, 'random_state': 48, 'subsample': 0.6} | 2  | 17 | 12 | 3 | 9  | 14 | 13 | 5  | 8  | 10 | 6  | 11 | 15 | 16 | 7  | 4  |  |
| 49 | XGB,<br>RFE | {'colsample_bytree': 0.6, 'gamma': 0.5, 'max_depth': 2,<br>'min_child_weight': 5, 'random_state': 49, 'subsample': 0.6} | 6  | 13 | 16 | 5 | 11 | 7  | 1  | 9  | 14 | 4  | 8  | 12 | 2  | 15 | 10 | 3  |  |
| 50 | XGB,<br>RFE | {'colsample_bytree': 0.6, 'gamma': 0.5, 'max_depth': 2,<br>'min_child_weight': 5, 'random_state': 50, 'subsample': 0.6} | 1  | 11 | 5  | 4 | 7  | 12 | 2  | 6  | 16 | 13 | 9  | 17 | 10 | 14 | 15 | 8  |  |
| 51 | XGB,<br>RFE | {'colsample_bytree': 0.6, 'gamma': 0.5, 'max_depth': 2,<br>'min_child_weight': 5, 'random_state': 51, 'subsample': 0.6} | 2  | 17 | 10 | 3 | 12 | 4  | 14 | 9  | 5  | 13 | 8  | 16 | 6  | 15 | 7  | 1  |  |
| 52 | XGB,<br>RFE | {'colsample_bytree': 0.6, 'gamma': 0.5, 'max_depth': 2,<br>'min_child_weight': 5, 'random_state': 52, 'subsample': 0.6} | 11 | 6  | 13 | 2 | 5  | 8  | 4  | 7  | 12 | 17 | 1  | 14 | 9  | 15 | 10 | 3  |  |
| 53 | XGB,<br>RFE | {'colsample_bytree': 0.6, 'gamma': 0.5, 'max_depth': 2,<br>'min_child_weight': 5, 'random_state': 53, 'subsample': 0.6} | 4  | 17 | 11 | 7 | 3  | 15 | 8  | 10 | 16 | 9  | 2  | 12 | 5  | 13 | 6  | 1  |  |
| 54 | XGB,<br>RFE | {'colsample_bytree': 0.6, 'gamma': 0.5, 'max_depth': 2,<br>'min_child_weight': 5, 'random_state': 54, 'subsample': 0.6} | 10 | 11 | 13 | 6 | 1  | 3  | 15 | 14 | 17 | 2  | 5  | 9  | 8  | 16 | 4  | 12 |  |
| 55 | XGB,<br>RFE | {'colsample_bytree': 0.6, 'gamma': 0.5, 'max_depth': 2,<br>'min_child_weight': 5, 'random_state': 55, 'subsample': 0.6} | 1  | 15 | 10 | 3 | 12 | 9  | 7  | 13 | 14 | 6  | 2  | 8  | 11 | 17 | 5  | 4  |  |
| 56 | XGB,<br>RFE | {'colsample_bytree': 0.6, 'gamma': 0.5, 'max_depth': 2,<br>'min_child_weight': 5, 'random_state': 56, 'subsample': 0.6} | 13 | 14 | 8  | 4 | 7  | 11 | 9  | 5  | 15 | 12 | 1  | 16 | 6  | 17 | 3  | 2  |  |
| 57 | XGB,<br>RFE | {'colsample_bytree': 0.6, 'gamma': 0.5, 'max_depth': 2,<br>'min_child_weight': 5, 'random_state': 57, 'subsample': 0.6} | 14 | 17 | 13 | 4 | 3  | 5  | 2  | 11 | 15 | 7  | 12 | 6  | 1  | 16 | 10 | 9  |  |
| 58 | XGB,<br>RFE | {'colsample_bytree': 0.6, 'gamma': 0.5, 'max_depth': 2,<br>'min_child_weight': 5, 'random_state': 58, 'subsample': 0.6} | 8  | 16 | 13 | 4 | 14 | 3  | 2  | 10 | 12 | 11 | 9  | 6  | 17 | 15 | 7  | 1  |  |

|    |             |                                                                                                                         |    |    |    |    |    |    |    |    |    |    |    |    |    |    |    |    |  |
|----|-------------|-------------------------------------------------------------------------------------------------------------------------|----|----|----|----|----|----|----|----|----|----|----|----|----|----|----|----|--|
| 59 | XGB,<br>RFE | {'colsample_bytree': 0.6, 'gamma': 0.5, 'max_depth': 2,<br>'min_child_weight': 5, 'random_state': 59, 'subsample': 0.6} | 3  | 12 | 11 | 13 | 4  | 6  | 1  | 10 | 14 | 7  | 2  | 9  | 16 | 15 | 8  | 5  |  |
| 60 | XGB,<br>RFE | {'colsample_bytree': 0.6, 'gamma': 0.5, 'max_depth': 2,<br>'min_child_weight': 5, 'random_state': 60, 'subsample': 0.6} | 1  | 14 | 9  | 8  | 12 | 7  | 10 | 13 | 15 | 4  | 5  | 16 | 6  | 17 | 3  | 2  |  |
| 61 | XGB,<br>RFE | {'colsample_bytree': 0.6, 'gamma': 0.5, 'max_depth': 2,<br>'min_child_weight': 5, 'random_state': 61, 'subsample': 0.6} | 15 | 14 | 16 | 8  | 6  | 12 | 7  | 11 | 5  | 1  | 4  | 13 | 10 | 17 | 2  | 3  |  |
| 62 | XGB,<br>RFE | {'colsample_bytree': 0.6, 'gamma': 0.5, 'max_depth': 2,<br>'min_child_weight': 5, 'random_state': 62, 'subsample': 0.6} | 2  | 17 | 12 | 3  | 9  | 10 | 5  | 13 | 15 | 14 | 1  | 16 | 8  | 6  | 7  | 4  |  |
| 63 | XGB,<br>RFE | {'colsample_bytree': 0.6, 'gamma': 0.5, 'max_depth': 2,<br>'min_child_weight': 5, 'random_state': 63, 'subsample': 0.6} | 15 | 16 | 7  | 6  | 12 | 5  | 11 | 8  | 17 | 9  | 4  | 10 | 1  | 14 | 3  | 2  |  |
| 64 | XGB,<br>RFE | {'colsample_bytree': 0.6, 'gamma': 0.5, 'max_depth': 2,<br>'min_child_weight': 5, 'random_state': 64, 'subsample': 0.6} | 1  | 16 | 10 | 14 | 4  | 5  | 7  | 8  | 12 | 6  | 2  | 9  | 17 | 11 | 15 | 3  |  |
| 65 | XGB,<br>RFE | {'colsample_bytree': 0.6, 'gamma': 0.5, 'max_depth': 2,<br>'min_child_weight': 5, 'random_state': 65, 'subsample': 0.6} | 1  | 14 | 10 | 4  | 6  | 7  | 5  | 12 | 15 | 8  | 11 | 9  | 3  | 17 | 16 | 2  |  |
| 66 | XGB,<br>RFE | {'colsample_bytree': 0.6, 'gamma': 0.5, 'max_depth': 2,<br>'min_child_weight': 5, 'random_state': 66, 'subsample': 0.6} | 1  | 17 | 15 | 4  | 7  | 13 | 5  | 9  | 11 | 12 | 2  | 10 | 14 | 16 | 8  | 3  |  |
| 67 | XGB,<br>RFE | {'colsample_bytree': 0.6, 'gamma': 0.5, 'max_depth': 2,<br>'min_child_weight': 5, 'random_state': 67, 'subsample': 0.6} | 1  | 17 | 15 | 7  | 9  | 3  | 13 | 11 | 10 | 14 | 8  | 5  | 6  | 12 | 16 | 4  |  |
| 68 | XGB,<br>RFE | {'colsample_bytree': 0.6, 'gamma': 0.5, 'max_depth': 2,<br>'min_child_weight': 5, 'random_state': 68, 'subsample': 0.6} | 10 | 8  | 11 | 4  | 3  | 14 | 7  | 16 | 17 | 9  | 6  | 5  | 13 | 15 | 2  | 1  |  |
| 69 | XGB,<br>RFE | {'colsample_bytree': 0.6, 'gamma': 0.5, 'max_depth': 2,<br>'min_child_weight': 5, 'random_state': 69, 'subsample': 0.6} | 11 | 16 | 17 | 7  | 5  | 8  | 13 | 9  | 6  | 10 | 4  | 12 | 1  | 14 | 2  | 3  |  |
| 70 | XGB,<br>RFE | {'colsample_bytree': 0.6, 'gamma': 0.5, 'max_depth': 2,<br>'min_child_weight': 5, 'random_state': 70, 'subsample': 0.6} | 6  | 17 | 7  | 4  | 5  | 11 | 9  | 12 | 15 | 3  | 8  | 10 | 13 | 16 | 2  | 1  |  |
| 71 | XGB,<br>RFE | {'colsample_bytree': 0.6, 'gamma': 0.5, 'max_depth': 2,<br>'min_child_weight': 5, 'random_state': 71, 'subsample': 0.6} | 8  | 12 | 9  | 6  | 3  | 15 | 4  | 13 | 14 | 11 | 2  | 7  | 10 | 17 | 5  | 1  |  |
| 72 | XGB,<br>RFE | {'colsample_bytree': 0.6, 'gamma': 0.5, 'max_depth': 2,<br>'min_child_weight': 5, 'random_state': 72, 'subsample': 0.6} | 15 | 11 | 12 | 3  | 7  | 5  | 10 | 4  | 17 | 6  | 2  | 13 | 1  | 14 | 8  | 16 |  |
| 73 | XGB,<br>RFE | {'colsample_bytree': 0.6, 'gamma': 0.5, 'max_depth': 2,<br>'min_child_weight': 5, 'random_state': 73, 'subsample': 0.6} | 12 | 16 | 11 | 2  | 8  | 3  | 14 | 9  | 7  | 5  | 4  | 6  | 15 | 17 | 1  | 13 |  |

|    |             |                                                                                                                         |    |    |    |    |    |    |    |    |    |    |   |    |    |    |    |    |  |
|----|-------------|-------------------------------------------------------------------------------------------------------------------------|----|----|----|----|----|----|----|----|----|----|---|----|----|----|----|----|--|
| 74 | XGB,<br>RFE | {'colsample_bytree': 0.6, 'gamma': 0.5, 'max_depth': 2,<br>'min_child_weight': 5, 'random_state': 74, 'subsample': 0.6} | 5  | 13 | 7  | 3  | 10 | 11 | 2  | 12 | 6  | 9  | 1 | 14 | 4  | 16 | 15 | 17 |  |
| 75 | XGB,<br>RFE | {'colsample_bytree': 0.6, 'gamma': 0.5, 'max_depth': 2,<br>'min_child_weight': 5, 'random_state': 75, 'subsample': 0.6} | 8  | 15 | 13 | 4  | 3  | 9  | 1  | 7  | 17 | 6  | 5 | 16 | 11 | 14 | 10 | 2  |  |
| 76 | XGB,<br>RFE | {'colsample_bytree': 0.6, 'gamma': 0.5, 'max_depth': 2,<br>'min_child_weight': 5, 'random_state': 76, 'subsample': 0.6} | 9  | 14 | 15 | 2  | 12 | 5  | 1  | 11 | 16 | 10 | 3 | 6  | 4  | 17 | 13 | 7  |  |
| 77 | XGB,<br>RFE | {'colsample_bytree': 0.6, 'gamma': 0.5, 'max_depth': 2,<br>'min_child_weight': 5, 'random_state': 77, 'subsample': 0.6} | 4  | 15 | 7  | 3  | 8  | 6  | 2  | 14 | 13 | 10 | 1 | 9  | 11 | 17 | 12 | 16 |  |
| 78 | XGB,<br>RFE | {'colsample_bytree': 0.6, 'gamma': 0.5, 'max_depth': 2,<br>'min_child_weight': 5, 'random_state': 78, 'subsample': 0.6} | 5  | 17 | 12 | 4  | 11 | 13 | 1  | 8  | 16 | 7  | 3 | 10 | 14 | 15 | 6  | 2  |  |
| 79 | XGB,<br>RFE | {'colsample_bytree': 0.6, 'gamma': 0.5, 'max_depth': 2,<br>'min_child_weight': 5, 'random_state': 79, 'subsample': 0.6} | 6  | 17 | 15 | 7  | 9  | 11 | 2  | 10 | 16 | 5  | 1 | 3  | 8  | 14 | 13 | 4  |  |
| 80 | XGB,<br>RFE | {'colsample_bytree': 0.6, 'gamma': 0.5, 'max_depth': 2,<br>'min_child_weight': 5, 'random_state': 80, 'subsample': 0.6} | 7  | 14 | 11 | 5  | 6  | 8  | 9  | 10 | 17 | 13 | 2 | 12 | 4  | 16 | 1  | 3  |  |
| 81 | XGB,<br>RFE | {'colsample_bytree': 0.6, 'gamma': 0.5, 'max_depth': 2,<br>'min_child_weight': 5, 'random_state': 81, 'subsample': 0.6} | 11 | 16 | 7  | 10 | 6  | 4  | 5  | 3  | 15 | 8  | 2 | 13 | 9  | 14 | 17 | 1  |  |
| 82 | XGB,<br>RFE | {'colsample_bytree': 0.6, 'gamma': 0.5, 'max_depth': 2,<br>'min_child_weight': 5, 'random_state': 82, 'subsample': 0.6} | 6  | 16 | 13 | 2  | 10 | 3  | 11 | 5  | 14 | 12 | 8 | 9  | 4  | 17 | 7  | 1  |  |
| 83 | XGB,<br>RFE | {'colsample_bytree': 0.6, 'gamma': 0.5, 'max_depth': 2,<br>'min_child_weight': 5, 'random_state': 83, 'subsample': 0.6} | 11 | 17 | 7  | 6  | 8  | 9  | 10 | 13 | 16 | 2  | 5 | 1  | 12 | 14 | 3  | 15 |  |
| 84 | XGB,<br>RFE | {'colsample_bytree': 0.6, 'gamma': 0.5, 'max_depth': 2,<br>'min_child_weight': 5, 'random_state': 84, 'subsample': 0.6} | 11 | 14 | 8  | 7  | 4  | 2  | 5  | 13 | 16 | 6  | 3 | 9  | 12 | 17 | 10 | 1  |  |
| 85 | XGB,<br>RFE | {'colsample_bytree': 0.6, 'gamma': 0.5, 'max_depth': 2,<br>'min_child_weight': 5, 'random_state': 85, 'subsample': 0.6} | 8  | 12 | 6  | 4  | 10 | 9  | 5  | 13 | 16 | 11 | 2 | 14 | 7  | 15 | 1  | 17 |  |
| 86 | XGB,<br>RFE | {'colsample_bytree': 0.6, 'gamma': 0.5, 'max_depth': 2,<br>'min_child_weight': 5, 'random_state': 86, 'subsample': 0.6} | 4  | 13 | 11 | 8  | 10 | 6  | 17 | 5  | 12 | 16 | 2 | 7  | 9  | 15 | 14 | 3  |  |
| 87 | XGB,<br>RFE | {'colsample_bytree': 0.6, 'gamma': 0.5, 'max_depth': 2,<br>'min_child_weight': 5, 'random_state': 87, 'subsample': 0.6} | 11 | 14 | 12 | 7  | 2  | 3  | 4  | 6  | 17 | 10 | 5 | 15 | 9  | 16 | 8  | 1  |  |
| 88 | XGB,<br>RFE | {'colsample_bytree': 0.6, 'gamma': 0.5, 'max_depth': 2,<br>'min_child_weight': 5, 'random_state': 88, 'subsample': 0.6} | 3  | 12 | 17 | 5  | 7  | 9  | 10 | 15 | 14 | 8  | 2 | 11 | 1  | 13 | 6  | 4  |  |



|    |             |                                                                                                                         |    |    |    |    |    |    |    |    |    |    |    |    |    |    |    |    |  |
|----|-------------|-------------------------------------------------------------------------------------------------------------------------|----|----|----|----|----|----|----|----|----|----|----|----|----|----|----|----|--|
| 89 | XGB,<br>RFE | {'colsample_bytree': 0.6, 'gamma': 0.5, 'max_depth': 2,<br>'min_child_weight': 5, 'random_state': 89, 'subsample': 0.6} | 9  | 17 | 16 | 11 | 1  | 3  | 5  | 15 | 10 | 8  | 4  | 7  | 2  | 14 | 12 | 13 |  |
| 90 | XGB,<br>RFE | {'colsample_bytree': 0.6, 'gamma': 0.5, 'max_depth': 2,<br>'min_child_weight': 5, 'random_state': 90, 'subsample': 0.6} | 11 | 12 | 16 | 7  | 6  | 14 | 2  | 13 | 17 | 3  | 1  | 10 | 9  | 15 | 5  | 8  |  |
| 91 | XGB,<br>RFE | {'colsample_bytree': 0.6, 'gamma': 0.5, 'max_depth': 2,<br>'min_child_weight': 5, 'random_state': 91, 'subsample': 0.6} | 7  | 16 | 9  | 4  | 11 | 10 | 3  | 14 | 13 | 8  | 1  | 15 | 6  | 17 | 5  | 2  |  |
| 92 | XGB,<br>RFE | {'colsample_bytree': 0.6, 'gamma': 0.5, 'max_depth': 2,<br>'min_child_weight': 5, 'random_state': 92, 'subsample': 0.6} | 9  | 10 | 11 | 4  | 12 | 2  | 7  | 5  | 17 | 15 | 1  | 13 | 6  | 14 | 8  | 3  |  |
| 93 | XGB,<br>RFE | {'colsample_bytree': 0.6, 'gamma': 0.5, 'max_depth': 2,<br>'min_child_weight': 5, 'random_state': 93, 'subsample': 0.6} | 13 | 14 | 15 | 5  | 7  | 3  | 10 | 2  | 16 | 9  | 1  | 11 | 4  | 17 | 12 | 6  |  |
| 94 | XGB,<br>RFE | {'colsample_bytree': 0.6, 'gamma': 0.5, 'max_depth': 2,<br>'min_child_weight': 5, 'random_state': 94, 'subsample': 0.6} | 1  | 17 | 4  | 3  | 9  | 8  | 6  | 7  | 16 | 14 | 5  | 13 | 10 | 11 | 12 | 2  |  |
| 95 | XGB,<br>RFE | {'colsample_bytree': 0.6, 'gamma': 0.5, 'max_depth': 2,<br>'min_child_weight': 5, 'random_state': 95, 'subsample': 0.6} | 5  | 14 | 6  | 1  | 4  | 13 | 12 | 3  | 17 | 11 | 9  | 7  | 15 | 16 | 8  | 2  |  |
| 96 | XGB,<br>RFE | {'colsample_bytree': 0.6, 'gamma': 0.5, 'max_depth': 2,<br>'min_child_weight': 5, 'random_state': 96, 'subsample': 0.6} | 4  | 17 | 10 | 2  | 7  | 6  | 11 | 5  | 16 | 3  | 1  | 15 | 9  | 13 | 8  | 12 |  |
| 97 | XGB,<br>RFE | {'colsample_bytree': 0.6, 'gamma': 0.5, 'max_depth': 2,<br>'min_child_weight': 5, 'random_state': 97, 'subsample': 0.6} | 5  | 13 | 6  | 3  | 4  | 12 | 2  | 14 | 15 | 10 | 1  | 16 | 9  | 8  | 7  | 17 |  |
| 98 | XGB,<br>RFE | {'colsample_bytree': 0.6, 'gamma': 0.5, 'max_depth': 2,<br>'min_child_weight': 5, 'random_state': 98, 'subsample': 0.6} | 4  | 10 | 15 | 3  | 6  | 9  | 8  | 11 | 14 | 12 | 16 | 5  | 17 | 13 | 2  | 1  |  |
| 99 | XGB,<br>RFE | {'colsample_bytree': 0.6, 'gamma': 0.5, 'max_depth': 2,<br>'min_child_weight': 5, 'random_state': 99, 'subsample': 0.6} | 2  | 16 | 5  | 3  | 4  | 10 | 7  | 9  | 17 | 6  | 1  | 12 | 8  | 11 | 14 | 15 |  |
| 0  | AVG         |                                                                                                                         | 5  | 15 | 14 | 2  | 6  | 1  | 4  | 8  | 16 | 7  | 0  | 10 | 11 | 12 | 3  | 9  |  |
| 1  | AVG         |                                                                                                                         | 2  | 15 | 14 | 1  | 4  | 5  | 8  | 10 | 16 | 0  | 3  | 11 | 9  | 12 | 6  | 7  |  |
| 2  | AVG         |                                                                                                                         | 9  | 12 | 11 | 2  | 5  | 0  | 6  | 10 | 16 | 7  | 1  | 14 | 8  | 13 | 4  | 3  |  |
| 3  | AVG         |                                                                                                                         | 5  | 16 | 11 | 0  | 7  | 1  | 10 | 3  | 13 | 9  | 2  | 8  | 12 | 14 | 6  | 4  |  |
| 4  | AVG         |                                                                                                                         | 2  | 15 | 12 | 1  | 5  | 0  | 11 | 9  | 16 | 13 | 3  | 8  | 6  | 14 | 7  | 4  |  |
| 5  | AVG         |                                                                                                                         | 4  | 13 | 15 | 2  | 6  | 0  | 8  | 9  | 16 | 5  | 1  | 14 | 3  | 11 | 7  | 10 |  |
| 6  | AVG         |                                                                                                                         | 5  | 15 | 14 | 2  | 4  | 1  | 11 | 9  | 13 | 3  | 0  | 10 | 8  | 12 | 7  | 6  |  |
| 7  | AVG         |                                                                                                                         | 3  | 10 | 12 | 0  | 7  | 1  | 13 | 6  | 16 | 8  | 4  | 15 | 5  | 11 | 9  | 2  |  |
| 8  | AVG         |                                                                                                                         | 4  | 16 | 14 | 1  | 2  | 3  | 9  | 12 | 13 | 8  | 0  | 5  | 6  | 11 | 10 | 7  |  |

|    |     |  |   |    |    |   |   |   |    |    |    |    |   |    |    |    |    |    |  |
|----|-----|--|---|----|----|---|---|---|----|----|----|----|---|----|----|----|----|----|--|
| 9  | AVG |  | 3 | 15 | 12 | 1 | 5 | 4 | 9  | 7  | 14 | 11 | 0 | 8  | 16 | 13 | 2  | 6  |  |
| 10 | AVG |  | 5 | 16 | 13 | 1 | 6 | 2 | 8  | 7  | 15 | 9  | 0 | 14 | 10 | 11 | 3  | 4  |  |
| 11 | AVG |  | 4 | 13 | 14 | 1 | 6 | 2 | 9  | 5  | 15 | 10 | 0 | 11 | 7  | 12 | 8  | 3  |  |
| 12 | AVG |  | 2 | 14 | 12 | 0 | 4 | 1 | 13 | 9  | 16 | 10 | 7 | 3  | 8  | 11 | 5  | 6  |  |
| 13 | AVG |  | 5 | 13 | 14 | 1 | 2 | 3 | 4  | 9  | 16 | 11 | 0 | 7  | 6  | 12 | 8  | 10 |  |
| 14 | AVG |  | 6 | 16 | 13 | 0 | 5 | 2 | 11 | 9  | 15 | 8  | 1 | 14 | 3  | 10 | 7  | 4  |  |
| 15 | AVG |  | 6 | 14 | 13 | 5 | 3 | 1 | 9  | 7  | 16 | 8  | 0 | 15 | 2  | 11 | 4  | 10 |  |
| 16 | AVG |  | 3 | 15 | 10 | 0 | 7 | 4 | 9  | 6  | 16 | 12 | 1 | 5  | 8  | 13 | 11 | 2  |  |
| 17 | AVG |  | 4 | 16 | 12 | 3 | 2 | 0 | 9  | 6  | 15 | 8  | 1 | 11 | 14 | 10 | 5  | 7  |  |
| 18 | AVG |  | 3 | 15 | 10 | 1 | 4 | 0 | 5  | 9  | 16 | 6  | 2 | 11 | 13 | 14 | 8  | 7  |  |
| 19 | AVG |  | 8 | 15 | 13 | 2 | 4 | 1 | 6  | 11 | 14 | 7  | 0 | 10 | 9  | 12 | 5  | 3  |  |
| 20 | AVG |  | 4 | 11 | 8  | 1 | 2 | 3 | 13 | 10 | 16 | 7  | 0 | 14 | 9  | 15 | 6  | 5  |  |
| 21 | AVG |  | 5 | 14 | 13 | 2 | 3 | 1 | 9  | 8  | 16 | 6  | 0 | 11 | 7  | 12 | 10 | 4  |  |
| 22 | AVG |  | 3 | 15 | 14 | 1 | 5 | 2 | 7  | 10 | 16 | 11 | 0 | 9  | 6  | 13 | 8  | 4  |  |
| 23 | AVG |  | 3 | 16 | 11 | 4 | 1 | 2 | 10 | 6  | 15 | 7  | 0 | 12 | 8  | 14 | 9  | 5  |  |
| 24 | AVG |  | 5 | 14 | 13 | 2 | 4 | 0 | 9  | 8  | 16 | 3  | 1 | 15 | 6  | 10 | 7  | 11 |  |
| 25 | AVG |  | 4 | 15 | 14 | 2 | 0 | 1 | 10 | 9  | 13 | 7  | 3 | 11 | 5  | 12 | 8  | 6  |  |
| 26 | AVG |  | 5 | 14 | 12 | 0 | 1 | 3 | 6  | 13 | 15 | 9  | 2 | 10 | 7  | 11 | 8  | 4  |  |
| 27 | AVG |  | 4 | 11 | 14 | 0 | 7 | 1 | 9  | 8  | 16 | 5  | 3 | 12 | 10 | 13 | 6  | 2  |  |
| 28 | AVG |  | 3 | 15 | 16 | 0 | 4 | 8 | 10 | 9  | 14 | 2  | 1 | 11 | 6  | 12 | 7  | 5  |  |
| 29 | AVG |  | 1 | 14 | 11 | 0 | 3 | 5 | 6  | 9  | 16 | 7  | 2 | 15 | 8  | 12 | 4  | 10 |  |
| 30 | AVG |  | 3 | 12 | 14 | 1 | 4 | 2 | 6  | 8  | 15 | 5  | 0 | 10 | 13 | 11 | 7  | 9  |  |
| 31 | AVG |  | 8 | 15 | 9  | 5 | 7 | 1 | 2  | 6  | 16 | 10 | 0 | 14 | 11 | 12 | 4  | 3  |  |
| 32 | AVG |  | 4 | 15 | 13 | 1 | 2 | 3 | 7  | 12 | 14 | 6  | 0 | 8  | 10 | 11 | 9  | 5  |  |
| 33 | AVG |  | 8 | 14 | 12 | 1 | 5 | 3 | 4  | 9  | 15 | 6  | 0 | 11 | 7  | 13 | 10 | 2  |  |
| 34 | AVG |  | 8 | 15 | 10 | 1 | 2 | 3 | 4  | 7  | 16 | 11 | 0 | 14 | 9  | 12 | 5  | 6  |  |
| 35 | AVG |  | 5 | 16 | 14 | 1 | 2 | 3 | 8  | 9  | 15 | 6  | 0 | 11 | 7  | 12 | 10 | 4  |  |
| 36 | AVG |  | 5 | 15 | 14 | 1 | 3 | 2 | 4  | 8  | 16 | 6  | 0 | 11 | 10 | 12 | 7  | 9  |  |
| 37 | AVG |  | 7 | 14 | 13 | 1 | 4 | 2 | 10 | 5  | 16 | 8  | 0 | 15 | 6  | 11 | 9  | 3  |  |
| 38 | AVG |  | 2 | 14 | 12 | 1 | 0 | 7 | 4  | 13 | 16 | 9  | 3 | 10 | 5  | 15 | 8  | 6  |  |
| 39 | AVG |  | 4 | 16 | 11 | 0 | 8 | 6 | 9  | 10 | 15 | 7  | 1 | 14 | 3  | 12 | 2  | 5  |  |

|    |     |  |    |    |    |   |   |   |    |    |    |    |   |    |    |    |    |    |  |
|----|-----|--|----|----|----|---|---|---|----|----|----|----|---|----|----|----|----|----|--|
| 40 | AVG |  | 2  | 16 | 11 | 4 | 1 | 3 | 5  | 13 | 15 | 7  | 0 | 6  | 8  | 14 | 9  | 12 |  |
| 41 | AVG |  | 5  | 14 | 9  | 1 | 7 | 2 | 3  | 10 | 16 | 4  | 0 | 8  | 15 | 12 | 6  | 11 |  |
| 42 | AVG |  | 6  | 15 | 12 | 0 | 8 | 1 | 5  | 9  | 16 | 10 | 2 | 11 | 3  | 13 | 4  | 7  |  |
| 43 | AVG |  | 1  | 16 | 14 | 4 | 2 | 3 | 11 | 8  | 15 | 9  | 0 | 12 | 7  | 13 | 6  | 5  |  |
| 44 | AVG |  | 5  | 16 | 13 | 1 | 3 | 6 | 7  | 4  | 15 | 2  | 0 | 10 | 14 | 8  | 9  | 11 |  |
| 45 | AVG |  | 4  | 9  | 14 | 1 | 3 | 2 | 10 | 12 | 15 | 7  | 0 | 16 | 5  | 11 | 6  | 8  |  |
| 46 | AVG |  | 3  | 13 | 14 | 2 | 6 | 1 | 9  | 15 | 16 | 7  | 0 | 8  | 11 | 10 | 5  | 4  |  |
| 47 | AVG |  | 5  | 15 | 12 | 0 | 2 | 3 | 6  | 11 | 16 | 9  | 1 | 10 | 7  | 14 | 8  | 4  |  |
| 48 | AVG |  | 2  | 16 | 13 | 0 | 8 | 3 | 10 | 6  | 15 | 5  | 1 | 14 | 11 | 12 | 7  | 4  |  |
| 49 | AVG |  | 4  | 12 | 14 | 0 | 6 | 1 | 9  | 7  | 15 | 3  | 2 | 13 | 5  | 11 | 10 | 8  |  |
| 50 | AVG |  | 4  | 14 | 12 | 0 | 8 | 2 | 3  | 6  | 16 | 5  | 1 | 15 | 11 | 13 | 10 | 7  |  |
| 51 | AVG |  | 3  | 16 | 14 | 0 | 7 | 1 | 10 | 5  | 12 | 8  | 6 | 11 | 9  | 15 | 4  | 2  |  |
| 52 | AVG |  | 8  | 12 | 13 | 1 | 3 | 2 | 5  | 6  | 16 | 10 | 0 | 15 | 7  | 11 | 9  | 4  |  |
| 53 | AVG |  | 2  | 15 | 13 | 1 | 3 | 4 | 8  | 9  | 16 | 7  | 0 | 11 | 10 | 12 | 6  | 5  |  |
| 54 | AVG |  | 5  | 15 | 14 | 1 | 3 | 0 | 10 | 8  | 16 | 7  | 2 | 13 | 6  | 11 | 4  | 9  |  |
| 55 | AVG |  | 4  | 15 | 12 | 2 | 3 | 1 | 7  | 9  | 16 | 5  | 0 | 10 | 8  | 14 | 6  | 11 |  |
| 56 | AVG |  | 10 | 15 | 11 | 1 | 4 | 2 | 9  | 7  | 16 | 8  | 0 | 14 | 6  | 12 | 3  | 5  |  |
| 57 | AVG |  | 9  | 15 | 12 | 3 | 2 | 1 | 5  | 10 | 16 | 6  | 4 | 11 | 0  | 14 | 7  | 8  |  |
| 58 | AVG |  | 3  | 15 | 13 | 1 | 8 | 0 | 4  | 7  | 16 | 12 | 2 | 14 | 9  | 11 | 6  | 5  |  |
| 59 | AVG |  | 3  | 14 | 11 | 5 | 2 | 0 | 4  | 6  | 15 | 10 | 1 | 12 | 9  | 13 | 8  | 7  |  |
| 60 | AVG |  | 4  | 13 | 11 | 3 | 5 | 2 | 8  | 9  | 16 | 0  | 1 | 12 | 10 | 15 | 7  | 6  |  |
| 61 | AVG |  | 9  | 15 | 13 | 0 | 6 | 3 | 7  | 10 | 12 | 5  | 1 | 16 | 8  | 11 | 2  | 4  |  |
| 62 | AVG |  | 1  | 16 | 13 | 4 | 2 | 3 | 5  | 12 | 15 | 8  | 0 | 11 | 9  | 10 | 7  | 6  |  |
| 63 | AVG |  | 9  | 14 | 12 | 0 | 7 | 4 | 11 | 3  | 16 | 8  | 1 | 10 | 2  | 13 | 6  | 5  |  |
| 64 | AVG |  | 3  | 15 | 12 | 2 | 6 | 1 | 7  | 8  | 14 | 5  | 0 | 11 | 10 | 13 | 9  | 4  |  |
| 65 | AVG |  | 2  | 13 | 12 | 0 | 3 | 7 | 5  | 9  | 14 | 4  | 1 | 10 | 6  | 15 | 11 | 8  |  |
| 66 | AVG |  | 0  | 15 | 14 | 2 | 1 | 4 | 5  | 6  | 16 | 7  | 3 | 13 | 11 | 12 | 8  | 9  |  |
| 67 | AVG |  | 3  | 16 | 14 | 2 | 5 | 0 | 12 | 9  | 15 | 6  | 4 | 10 | 1  | 13 | 11 | 8  |  |
| 68 | AVG |  | 8  | 10 | 14 | 0 | 2 | 3 | 9  | 11 | 16 | 6  | 1 | 7  | 13 | 12 | 4  | 5  |  |
| 69 | AVG |  | 4  | 15 | 14 | 0 | 3 | 1 | 9  | 6  | 12 | 10 | 2 | 13 | 8  | 11 | 5  | 7  |  |
| 70 | AVG |  | 5  | 16 | 11 | 0 | 7 | 2 | 9  | 10 | 14 | 6  | 1 | 8  | 13 | 12 | 3  | 4  |  |

|    |     |  |   |    |    |   |   |   |    |    |    |    |   |    |    |    |    |    |  |
|----|-----|--|---|----|----|---|---|---|----|----|----|----|---|----|----|----|----|----|--|
| 71 | AVG |  | 5 | 13 | 12 | 4 | 1 | 6 | 2  | 10 | 14 | 11 | 0 | 8  | 9  | 15 | 7  | 3  |  |
| 72 | AVG |  | 7 | 14 | 12 | 2 | 3 | 0 | 8  | 5  | 15 | 6  | 1 | 16 | 4  | 11 | 9  | 10 |  |
| 73 | AVG |  | 6 | 15 | 13 | 1 | 5 | 2 | 10 | 7  | 11 | 3  | 0 | 8  | 9  | 14 | 4  | 16 |  |
| 74 | AVG |  | 6 | 15 | 10 | 1 | 2 | 4 | 5  | 8  | 9  | 7  | 0 | 11 | 3  | 14 | 12 | 16 |  |
| 75 | AVG |  | 7 | 14 | 10 | 1 | 2 | 3 | 6  | 9  | 16 | 4  | 0 | 15 | 12 | 11 | 8  | 5  |  |
| 76 | AVG |  | 4 | 16 | 15 | 0 | 3 | 2 | 7  | 8  | 14 | 6  | 1 | 10 | 5  | 13 | 9  | 12 |  |
| 77 | AVG |  | 4 | 16 | 10 | 0 | 5 | 1 | 3  | 12 | 14 | 7  | 2 | 11 | 13 | 15 | 6  | 8  |  |
| 78 | AVG |  | 6 | 15 | 11 | 1 | 8 | 2 | 7  | 9  | 16 | 3  | 0 | 12 | 14 | 13 | 4  | 5  |  |
| 79 | AVG |  | 3 | 16 | 13 | 2 | 5 | 1 | 8  | 10 | 15 | 4  | 0 | 11 | 7  | 12 | 9  | 6  |  |
| 80 | AVG |  | 4 | 12 | 11 | 1 | 6 | 2 | 9  | 7  | 16 | 8  | 0 | 14 | 10 | 13 | 5  | 3  |  |
| 81 | AVG |  | 7 | 14 | 10 | 1 | 6 | 0 | 8  | 5  | 16 | 3  | 4 | 11 | 9  | 12 | 13 | 2  |  |
| 82 | AVG |  | 5 | 11 | 13 | 1 | 7 | 0 | 12 | 8  | 15 | 10 | 2 | 9  | 3  | 14 | 4  | 6  |  |
| 83 | AVG |  | 6 | 16 | 9  | 0 | 4 | 3 | 10 | 11 | 15 | 1  | 2 | 8  | 7  | 14 | 5  | 13 |  |
| 84 | AVG |  | 8 | 15 | 11 | 2 | 3 | 0 | 5  | 10 | 16 | 4  | 1 | 9  | 12 | 13 | 6  | 7  |  |
| 85 | AVG |  | 5 | 12 | 9  | 1 | 4 | 2 | 7  | 8  | 16 | 6  | 0 | 15 | 10 | 13 | 3  | 11 |  |
| 86 | AVG |  | 4 | 15 | 14 | 1 | 6 | 2 | 13 | 5  | 16 | 7  | 0 | 9  | 11 | 10 | 8  | 3  |  |
| 87 | AVG |  | 7 | 15 | 12 | 4 | 3 | 0 | 6  | 9  | 16 | 5  | 1 | 13 | 10 | 11 | 8  | 2  |  |
| 88 | AVG |  | 5 | 14 | 16 | 1 | 7 | 2 | 9  | 10 | 15 | 6  | 0 | 11 | 4  | 12 | 3  | 8  |  |
| 89 | AVG |  | 6 | 16 | 15 | 3 | 4 | 0 | 5  | 10 | 14 | 7  | 2 | 13 | 1  | 12 | 8  | 9  |  |
| 90 | AVG |  | 8 | 14 | 13 | 1 | 2 | 5 | 3  | 10 | 16 | 6  | 0 | 7  | 11 | 15 | 4  | 9  |  |
| 91 | AVG |  | 4 | 14 | 12 | 1 | 7 | 2 | 3  | 13 | 16 | 8  | 0 | 9  | 10 | 15 | 6  | 5  |  |
| 92 | AVG |  | 3 | 14 | 13 | 2 | 6 | 1 | 4  | 8  | 16 | 9  | 0 | 10 | 11 | 12 | 5  | 7  |  |
| 93 | AVG |  | 8 | 14 | 13 | 1 | 3 | 2 | 7  | 4  | 16 | 6  | 0 | 11 | 10 | 12 | 9  | 5  |  |
| 94 | AVG |  | 1 | 16 | 6  | 0 | 5 | 3 | 7  | 11 | 15 | 12 | 2 | 13 | 10 | 8  | 9  | 4  |  |
| 95 | AVG |  | 4 | 12 | 13 | 0 | 5 | 3 | 8  | 2  | 16 | 9  | 1 | 10 | 11 | 14 | 7  | 6  |  |
| 96 | AVG |  | 2 | 15 | 11 | 5 | 1 | 3 | 7  | 8  | 16 | 4  | 0 | 10 | 13 | 12 | 6  | 9  |  |
| 97 | AVG |  | 4 | 15 | 9  | 2 | 5 | 3 | 1  | 11 | 16 | 10 | 0 | 14 | 7  | 8  | 6  | 13 |  |
| 98 | AVG |  | 4 | 12 | 15 | 0 | 5 | 7 | 6  | 8  | 16 | 9  | 3 | 10 | 13 | 14 | 1  | 2  |  |
| 99 | AVG |  | 2 | 15 | 13 | 1 | 4 | 3 | 9  | 10 | 16 | 6  | 0 | 7  | 5  | 12 | 8  | 11 |  |

ii. 1-year VT recurrence

| Iteration number (random_state) | Model      | Parameters                                                                                                                                       | Age | Atrial fibrillation | NYHA | EF | LVESD | TAPSE | E wave deceleration time (DT) | MR | TR III-IV | ICD shock | HD instability | Incessant_VT | ES or multiple ICD therapies | Inducible VT morphologies | Clinical VT cycle length | Clinical VT eliminated |
|---------------------------------|------------|--------------------------------------------------------------------------------------------------------------------------------------------------|-----|---------------------|------|----|-------|-------|-------------------------------|----|-----------|-----------|----------------|--------------|------------------------------|---------------------------|--------------------------|------------------------|
| 0                               | MLP,<br>PI | {'NN__activation': 'identity', 'NN__alpha': 1, 'NN__hidden_layer_sizes': (5,), 'NN__max_iter': 200, 'NN__random_state': 0, 'NN__solver': 'adam'} | 15  | 7                   | 6    | 11 | 4     | 5     | 10                            | 2  | 13        | 3         | 9              | 1            | 12                           | 0                         | 16                       | 14                     |
| 1                               | MLP,<br>PI | {'NN__activation': 'identity', 'NN__alpha': 1, 'NN__hidden_layer_sizes': (5,), 'NN__max_iter': 200, 'NN__random_state': 1, 'NN__solver': 'adam'} | 14  | 10                  | 8    | 12 | 3     | 7     | 6                             | 5  | 9         | 2         | 4              | 1            | 11                           | 0                         | 16                       | 15                     |
| 2                               | MLP,<br>PI | {'NN__activation': 'identity', 'NN__alpha': 1, 'NN__hidden_layer_sizes': (5,), 'NN__max_iter': 200, 'NN__random_state': 2, 'NN__solver': 'adam'} | 14  | 10                  | 8    | 13 | 2     | 5     | 6                             | 7  | 11        | 3         | 4              | 1            | 9                            | 0                         | 15                       | 16                     |
| 3                               | MLP,<br>PI | {'NN__activation': 'identity', 'NN__alpha': 1, 'NN__hidden_layer_sizes': (5,), 'NN__max_iter': 200, 'NN__random_state': 3, 'NN__solver': 'adam'} | 10  | 9                   | 8    | 12 | 6     | 5     | 16                            | 2  | 11        | 3         | 4              | 1            | 7                            | 0                         | 13                       | 15                     |
| 4                               | MLP,<br>PI | {'NN__activation': 'identity', 'NN__alpha': 1, 'NN__hidden_layer_sizes': (5,), 'NN__max_iter': 200, 'NN__random_state': 4, 'NN__solver': 'adam'} | 12  | 10                  | 7    | 15 | 8     | 5     | 1                             | 3  | 16        | 4         | 2              | 6            | 14                           | 0                         | 13                       | 11                     |

|    |            |                                                                                                                                                        |    |    |    |    |    |   |    |   |    |    |    |    |    |   |    |    |
|----|------------|--------------------------------------------------------------------------------------------------------------------------------------------------------|----|----|----|----|----|---|----|---|----|----|----|----|----|---|----|----|
| 5  | MLP,<br>PI | {'NN__activation': 'identity', 'NN__alpha': 1,<br>'NN__hidden_layer_sizes': (5,),'NN__max_iter': 200,<br>'NN__random_state': 5, 'NN__solver': 'adam'}  | 11 | 14 | 16 | 9  | 4  | 5 | 6  | 2 | 15 | 3  | 1  | 10 | 7  | 0 | 12 | 13 |
| 6  | MLP,<br>PI | {'NN__activation': 'identity', 'NN__alpha': 1,<br>'NN__hidden_layer_sizes': (5,),'NN__max_iter': 200,<br>'NN__random_state': 6, 'NN__solver': 'adam'}  | 14 | 12 | 8  | 13 | 6  | 7 | 4  | 2 | 9  | 1  | 3  | 5  | 16 | 0 | 15 | 11 |
| 7  | MLP,<br>PI | {'NN__activation': 'identity', 'NN__alpha': 1,<br>'NN__hidden_layer_sizes': (5,),'NN__max_iter': 200,<br>'NN__random_state': 7, 'NN__solver': 'adam'}  | 12 | 13 | 9  | 15 | 4  | 5 | 7  | 3 | 8  | 10 | 2  | 11 | 1  | 0 | 14 | 16 |
| 8  | MLP,<br>PI | {'NN__activation': 'identity', 'NN__alpha': 1,<br>'NN__hidden_layer_sizes': (5,),'NN__max_iter': 200,<br>'NN__random_state': 8, 'NN__solver': 'adam'}  | 13 | 8  | 6  | 16 | 3  | 9 | 10 | 7 | 14 | 2  | 4  | 0  | 5  | 1 | 15 | 11 |
| 9  | MLP,<br>PI | {'NN__activation': 'identity', 'NN__alpha': 1,<br>'NN__hidden_layer_sizes': (5,),'NN__max_iter': 200,<br>'NN__random_state': 9, 'NN__solver': 'adam'}  | 14 | 9  | 11 | 8  | 7  | 6 | 3  | 5 | 15 | 16 | 2  | 1  | 4  | 0 | 13 | 12 |
| 10 | MLP,<br>PI | {'NN__activation': 'identity', 'NN__alpha': 1,<br>'NN__hidden_layer_sizes': (5,),'NN__max_iter': 200,<br>'NN__random_state': 10, 'NN__solver': 'adam'} | 16 | 10 | 7  | 13 | 2  | 5 | 6  | 8 | 12 | 4  | 3  | 1  | 9  | 0 | 14 | 15 |
| 11 | MLP,<br>PI | {'NN__activation': 'identity', 'NN__alpha': 1,<br>'NN__hidden_layer_sizes': (5,),'NN__max_iter': 200,<br>'NN__random_state': 11, 'NN__solver': 'adam'} | 15 | 13 | 8  | 11 | 4  | 5 | 7  | 2 | 12 | 6  | 3  | 10 | 1  | 0 | 14 | 16 |
| 12 | MLP,<br>PI | {'NN__activation': 'identity', 'NN__alpha': 1,<br>'NN__hidden_layer_sizes': (5,),'NN__max_iter': 200,<br>'NN__random_state': 12, 'NN__solver': 'adam'} | 5  | 7  | 4  | 16 | 12 | 6 | 15 | 1 | 9  | 2  | 11 | 3  | 8  | 0 | 13 | 14 |
| 13 | MLP,<br>PI | {'NN__activation': 'identity', 'NN__alpha': 1,<br>'NN__hidden_layer_sizes': (5,),'NN__max_iter': 200,<br>'NN__random_state': 13, 'NN__solver': 'adam'} | 10 | 11 | 9  | 13 | 4  | 6 | 5  | 2 | 14 | 12 | 3  | 0  | 7  | 1 | 16 | 15 |
| 14 | MLP,<br>PI | {'NN__activation': 'identity', 'NN__alpha': 1,<br>'NN__hidden_layer_sizes': (5,),'NN__max_iter': 200,<br>'NN__random_state': 14, 'NN__solver': 'adam'} | 16 | 14 | 7  | 8  | 6  | 4 | 5  | 3 | 11 | 2  | 9  | 13 | 1  | 0 | 12 | 10 |

|    |            |                                                                                                                                                        |    |    |    |    |    |    |    |   |    |   |   |   |    |   |    |    |
|----|------------|--------------------------------------------------------------------------------------------------------------------------------------------------------|----|----|----|----|----|----|----|---|----|---|---|---|----|---|----|----|
| 15 | MLP,<br>PI | {'NN__activation': 'identity', 'NN__alpha': 1,<br>'NN__hidden_layer_sizes': (5,),'NN__max_iter': 200,<br>'NN__random_state': 15, 'NN__solver': 'adam'} | 10 | 13 | 7  | 12 | 5  | 6  | 8  | 3 | 11 | 2 | 4 | 9 | 1  | 0 | 16 | 14 |
| 16 | MLP,<br>PI | {'NN__activation': 'identity', 'NN__alpha': 1,<br>'NN__hidden_layer_sizes': (5,),'NN__max_iter': 200,<br>'NN__random_state': 16, 'NN__solver': 'adam'} | 13 | 8  | 7  | 9  | 11 | 10 | 3  | 4 | 15 | 6 | 5 | 0 | 2  | 1 | 16 | 14 |
| 17 | MLP,<br>PI | {'NN__activation': 'identity', 'NN__alpha': 1,<br>'NN__hidden_layer_sizes': (5,),'NN__max_iter': 200,<br>'NN__random_state': 17, 'NN__solver': 'adam'} | 12 | 10 | 5  | 11 | 3  | 7  | 8  | 4 | 14 | 2 | 6 | 1 | 9  | 0 | 15 | 13 |
| 18 | MLP,<br>PI | {'NN__activation': 'identity', 'NN__alpha': 1,<br>'NN__hidden_layer_sizes': (5,),'NN__max_iter': 200,<br>'NN__random_state': 18, 'NN__solver': 'adam'} | 13 | 12 | 7  | 9  | 5  | 10 | 8  | 3 | 15 | 2 | 4 | 1 | 6  | 0 | 16 | 11 |
| 19 | MLP,<br>PI | {'NN__activation': 'identity', 'NN__alpha': 1,<br>'NN__hidden_layer_sizes': (5,),'NN__max_iter': 200,<br>'NN__random_state': 19, 'NN__solver': 'adam'} | 16 | 12 | 5  | 14 | 3  | 7  | 11 | 4 | 9  | 6 | 8 | 0 | 2  | 1 | 15 | 13 |
| 20 | MLP,<br>PI | {'NN__activation': 'identity', 'NN__alpha': 1,<br>'NN__hidden_layer_sizes': (5,),'NN__max_iter': 200,<br>'NN__random_state': 20, 'NN__solver': 'adam'} | 10 | 7  | 9  | 16 | 5  | 4  | 13 | 2 | 11 | 8 | 3 | 1 | 6  | 0 | 14 | 15 |
| 21 | MLP,<br>PI | {'NN__activation': 'identity', 'NN__alpha': 1,<br>'NN__hidden_layer_sizes': (5,),'NN__max_iter': 200,<br>'NN__random_state': 21, 'NN__solver': 'adam'} | 14 | 9  | 8  | 11 | 1  | 5  | 6  | 7 | 12 | 2 | 3 | 4 | 15 | 0 | 16 | 13 |
| 22 | MLP,<br>PI | {'NN__activation': 'identity', 'NN__alpha': 1,<br>'NN__hidden_layer_sizes': (5,),'NN__max_iter': 200,<br>'NN__random_state': 22, 'NN__solver': 'adam'} | 13 | 15 | 7  | 12 | 2  | 8  | 3  | 5 | 16 | 4 | 6 | 1 | 9  | 0 | 14 | 11 |
| 23 | MLP,<br>PI | {'NN__activation': 'identity', 'NN__alpha': 1,<br>'NN__hidden_layer_sizes': (5,),'NN__max_iter': 200,<br>'NN__random_state': 23, 'NN__solver': 'adam'} | 9  | 12 | 16 | 10 | 0  | 4  | 11 | 5 | 14 | 2 | 3 | 8 | 6  | 1 | 15 | 13 |
| 24 | MLP,<br>PI | {'NN__activation': 'identity', 'NN__alpha': 1,<br>'NN__hidden_layer_sizes': (5,),'NN__max_iter': 200,<br>'NN__random_state': 24, 'NN__solver': 'adam'} | 14 | 11 | 8  | 15 | 1  | 7  | 6  | 5 | 9  | 2 | 3 | 4 | 16 | 0 | 13 | 12 |

|    |            |                                                                                                                                                        |    |    |   |    |    |    |    |   |    |    |   |    |    |   |    |    |  |
|----|------------|--------------------------------------------------------------------------------------------------------------------------------------------------------|----|----|---|----|----|----|----|---|----|----|---|----|----|---|----|----|--|
| 25 | MLP,<br>PI | {'NN__activation': 'identity', 'NN__alpha': 1,<br>'NN__hidden_layer_sizes': (5,),'NN__max_iter': 200,<br>'NN__random_state': 25, 'NN__solver': 'adam'} | 16 | 12 | 9 | 13 | 2  | 8  | 7  | 4 | 15 | 10 | 3 | 0  | 6  | 1 | 14 | 11 |  |
| 26 | MLP,<br>PI | {'NN__activation': 'identity', 'NN__alpha': 1,<br>'NN__hidden_layer_sizes': (5,),'NN__max_iter': 200,<br>'NN__random_state': 26, 'NN__solver': 'adam'} | 11 | 8  | 9 | 10 | 1  | 7  | 5  | 4 | 14 | 16 | 0 | 3  | 15 | 2 | 13 | 12 |  |
| 27 | MLP,<br>PI | {'NN__activation': 'identity', 'NN__alpha': 1,<br>'NN__hidden_layer_sizes': (5,),'NN__max_iter': 200,<br>'NN__random_state': 27, 'NN__solver': 'adam'} | 12 | 9  | 8 | 2  | 16 | 11 | 4  | 5 | 15 | 7  | 6 | 0  | 3  | 1 | 14 | 13 |  |
| 28 | MLP,<br>PI | {'NN__activation': 'identity', 'NN__alpha': 1,<br>'NN__hidden_layer_sizes': (5,),'NN__max_iter': 200,<br>'NN__random_state': 28, 'NN__solver': 'adam'} | 10 | 6  | 4 | 7  | 5  | 9  | 15 | 1 | 16 | 2  | 8 | 3  | 13 | 0 | 12 | 14 |  |
| 29 | MLP,<br>PI | {'NN__activation': 'identity', 'NN__alpha': 1,<br>'NN__hidden_layer_sizes': (5,),'NN__max_iter': 200,<br>'NN__random_state': 29, 'NN__solver': 'adam'} | 13 | 9  | 8 | 7  | 10 | 3  | 6  | 1 | 12 | 2  | 5 | 16 | 4  | 0 | 14 | 15 |  |
| 30 | MLP,<br>PI | {'NN__activation': 'identity', 'NN__alpha': 1,<br>'NN__hidden_layer_sizes': (5,),'NN__max_iter': 200,<br>'NN__random_state': 30, 'NN__solver': 'adam'} | 10 | 6  | 9 | 2  | 16 | 8  | 11 | 1 | 12 | 4  | 5 | 3  | 7  | 0 | 15 | 14 |  |
| 31 | MLP,<br>PI | {'NN__activation': 'identity', 'NN__alpha': 1,<br>'NN__hidden_layer_sizes': (5,),'NN__max_iter': 200,<br>'NN__random_state': 31, 'NN__solver': 'adam'} | 13 | 10 | 7 | 14 | 2  | 4  | 8  | 6 | 11 | 3  | 5 | 0  | 9  | 1 | 15 | 16 |  |
| 32 | MLP,<br>PI | {'NN__activation': 'identity', 'NN__alpha': 1,<br>'NN__hidden_layer_sizes': (5,),'NN__max_iter': 200,<br>'NN__random_state': 32, 'NN__solver': 'adam'} | 13 | 12 | 8 | 15 | 7  | 9  | 5  | 3 | 14 | 6  | 4 | 0  | 2  | 1 | 11 | 16 |  |
| 33 | MLP,<br>PI | {'NN__activation': 'identity', 'NN__alpha': 1,<br>'NN__hidden_layer_sizes': (5,),'NN__max_iter': 200,<br>'NN__random_state': 33, 'NN__solver': 'adam'} | 11 | 12 | 7 | 16 | 1  | 8  | 6  | 3 | 10 | 2  | 5 | 4  | 13 | 0 | 14 | 15 |  |
| 34 | MLP,<br>PI | {'NN__activation': 'identity', 'NN__alpha': 1,<br>'NN__hidden_layer_sizes': (5,),'NN__max_iter': 200,<br>'NN__random_state': 34, 'NN__solver': 'adam'} | 10 | 15 | 9 | 13 | 6  | 7  | 5  | 1 | 8  | 2  | 3 | 16 | 4  | 0 | 11 | 14 |  |



|    |            |                                                                                                                                                        |    |    |    |    |    |    |    |    |    |    |   |    |    |   |    |    |
|----|------------|--------------------------------------------------------------------------------------------------------------------------------------------------------|----|----|----|----|----|----|----|----|----|----|---|----|----|---|----|----|
| 35 | MLP,<br>PI | {'NN__activation': 'identity', 'NN__alpha': 1,<br>'NN__hidden_layer_sizes': (5,),'NN__max_iter': 200,<br>'NN__random_state': 35, 'NN__solver': 'adam'} | 11 | 8  | 4  | 16 | 2  | 6  | 5  | 1  | 13 | 3  | 7 | 12 | 10 | 0 | 15 | 14 |
| 36 | MLP,<br>PI | {'NN__activation': 'identity', 'NN__alpha': 1,<br>'NN__hidden_layer_sizes': (5,),'NN__max_iter': 200,<br>'NN__random_state': 36, 'NN__solver': 'adam'} | 11 | 14 | 9  | 13 | 2  | 8  | 7  | 6  | 15 | 3  | 5 | 0  | 4  | 1 | 16 | 12 |
| 37 | MLP,<br>PI | {'NN__activation': 'identity', 'NN__alpha': 1,<br>'NN__hidden_layer_sizes': (5,),'NN__max_iter': 200,<br>'NN__random_state': 37, 'NN__solver': 'adam'} | 15 | 8  | 7  | 10 | 2  | 5  | 13 | 1  | 9  | 3  | 4 | 12 | 6  | 0 | 11 | 14 |
| 38 | MLP,<br>PI | {'NN__activation': 'identity', 'NN__alpha': 1,<br>'NN__hidden_layer_sizes': (5,),'NN__max_iter': 200,<br>'NN__random_state': 38, 'NN__solver': 'adam'} | 10 | 7  | 4  | 9  | 1  | 16 | 2  | 14 | 13 | 15 | 3 | 5  | 8  | 0 | 12 | 11 |
| 39 | MLP,<br>PI | {'NN__activation': 'identity', 'NN__alpha': 1,<br>'NN__hidden_layer_sizes': (5,),'NN__max_iter': 200,<br>'NN__random_state': 39, 'NN__solver': 'adam'} | 14 | 9  | 5  | 2  | 12 | 10 | 3  | 4  | 11 | 1  | 7 | 16 | 6  | 0 | 15 | 13 |
| 40 | MLP,<br>PI | {'NN__activation': 'identity', 'NN__alpha': 1,<br>'NN__hidden_layer_sizes': (5,),'NN__max_iter': 200,<br>'NN__random_state': 40, 'NN__solver': 'adam'} | 16 | 10 | 12 | 15 | 3  | 14 | 4  | 6  | 11 | 0  | 2 | 5  | 13 | 1 | 8  | 7  |
| 41 | MLP,<br>PI | {'NN__activation': 'identity', 'NN__alpha': 1,<br>'NN__hidden_layer_sizes': (5,),'NN__max_iter': 200,<br>'NN__random_state': 41, 'NN__solver': 'adam'} | 15 | 10 | 6  | 16 | 5  | 11 | 7  | 4  | 13 | 3  | 2 | 1  | 12 | 0 | 9  | 8  |
| 42 | MLP,<br>PI | {'NN__activation': 'identity', 'NN__alpha': 1,<br>'NN__hidden_layer_sizes': (5,),'NN__max_iter': 200,<br>'NN__random_state': 42, 'NN__solver': 'adam'} | 8  | 16 | 5  | 6  | 11 | 2  | 3  | 12 | 15 | 9  | 4 | 7  | 1  | 0 | 13 | 14 |
| 43 | MLP,<br>PI | {'NN__activation': 'identity', 'NN__alpha': 1,<br>'NN__hidden_layer_sizes': (5,),'NN__max_iter': 200,<br>'NN__random_state': 43, 'NN__solver': 'adam'} | 13 | 11 | 10 | 12 | 5  | 9  | 7  | 3  | 15 | 6  | 2 | 0  | 4  | 1 | 14 | 16 |
| 44 | MLP,<br>PI | {'NN__activation': 'identity', 'NN__alpha': 1,<br>'NN__hidden_layer_sizes': (5,),'NN__max_iter': 200,<br>'NN__random_state': 44, 'NN__solver': 'adam'} | 10 | 8  | 7  | 15 | 2  | 12 | 6  | 3  | 14 | 1  | 4 | 5  | 16 | 0 | 13 | 11 |

|    |            |                                                                                                                                                        |    |    |   |    |    |   |    |   |    |   |    |    |    |   |    |    |
|----|------------|--------------------------------------------------------------------------------------------------------------------------------------------------------|----|----|---|----|----|---|----|---|----|---|----|----|----|---|----|----|
| 45 | MLP,<br>PI | {'NN__activation': 'identity', 'NN__alpha': 1,<br>'NN__hidden_layer_sizes': (5,),'NN__max_iter': 200,<br>'NN__random_state': 45, 'NN__solver': 'adam'} | 13 | 11 | 8 | 14 | 2  | 7 | 4  | 1 | 10 | 6 | 3  | 5  | 16 | 0 | 15 | 12 |
| 46 | MLP,<br>PI | {'NN__activation': 'identity', 'NN__alpha': 1,<br>'NN__hidden_layer_sizes': (5,),'NN__max_iter': 200,<br>'NN__random_state': 46, 'NN__solver': 'adam'} | 13 | 16 | 8 | 14 | 0  | 6 | 5  | 7 | 10 | 4 | 3  | 2  | 12 | 1 | 15 | 11 |
| 47 | MLP,<br>PI | {'NN__activation': 'identity', 'NN__alpha': 1,<br>'NN__hidden_layer_sizes': (5,),'NN__max_iter': 200,<br>'NN__random_state': 47, 'NN__solver': 'adam'} | 14 | 9  | 6 | 15 | 1  | 8 | 4  | 5 | 16 | 2 | 3  | 7  | 12 | 0 | 13 | 10 |
| 48 | MLP,<br>PI | {'NN__activation': 'identity', 'NN__alpha': 1,<br>'NN__hidden_layer_sizes': (5,),'NN__max_iter': 200,<br>'NN__random_state': 48, 'NN__solver': 'adam'} | 9  | 16 | 3 | 13 | 4  | 8 | 7  | 6 | 12 | 1 | 5  | 2  | 15 | 0 | 14 | 11 |
| 49 | MLP,<br>PI | {'NN__activation': 'identity', 'NN__alpha': 1,<br>'NN__hidden_layer_sizes': (5,),'NN__max_iter': 200,<br>'NN__random_state': 49, 'NN__solver': 'adam'} | 11 | 8  | 7 | 14 | 2  | 5 | 10 | 1 | 9  | 4 | 6  | 16 | 3  | 0 | 13 | 15 |
| 50 | MLP,<br>PI | {'NN__activation': 'identity', 'NN__alpha': 1,<br>'NN__hidden_layer_sizes': (5,),'NN__max_iter': 200,<br>'NN__random_state': 50, 'NN__solver': 'adam'} | 12 | 10 | 8 | 9  | 7  | 5 | 6  | 2 | 15 | 3 | 4  | 1  | 11 | 0 | 14 | 16 |
| 51 | MLP,<br>PI | {'NN__activation': 'identity', 'NN__alpha': 1,<br>'NN__hidden_layer_sizes': (5,),'NN__max_iter': 200,<br>'NN__random_state': 51, 'NN__solver': 'adam'} | 13 | 10 | 7 | 9  | 4  | 5 | 12 | 3 | 8  | 1 | 16 | 2  | 15 | 0 | 6  | 14 |
| 52 | MLP,<br>PI | {'NN__activation': 'identity', 'NN__alpha': 1,<br>'NN__hidden_layer_sizes': (5,),'NN__max_iter': 200,<br>'NN__random_state': 52, 'NN__solver': 'adam'} | 16 | 9  | 5 | 12 | 1  | 6 | 7  | 2 | 14 | 4 | 3  | 10 | 8  | 0 | 13 | 15 |
| 53 | MLP,<br>PI | {'NN__activation': 'identity', 'NN__alpha': 1,<br>'NN__hidden_layer_sizes': (5,),'NN__max_iter': 200,<br>'NN__random_state': 53, 'NN__solver': 'adam'} | 9  | 7  | 6 | 16 | 11 | 2 | 14 | 1 | 12 | 5 | 4  | 3  | 10 | 0 | 15 | 13 |
| 54 | MLP,<br>PI | {'NN__activation': 'identity', 'NN__alpha': 1,<br>'NN__hidden_layer_sizes': (5,),'NN__max_iter': 200,<br>'NN__random_state': 54, 'NN__solver': 'adam'} | 10 | 9  | 7 | 12 | 6  | 3 | 15 | 2 | 8  | 4 | 5  | 16 | 1  | 0 | 14 | 13 |

|    |            |                                                                                                                                                        |    |    |    |    |    |    |    |   |    |    |   |    |    |   |    |    |
|----|------------|--------------------------------------------------------------------------------------------------------------------------------------------------------|----|----|----|----|----|----|----|---|----|----|---|----|----|---|----|----|
| 55 | MLP,<br>PI | {'NN__activation': 'identity', 'NN__alpha': 1,<br>'NN__hidden_layer_sizes': (5,),'NN__max_iter': 200,<br>'NN__random_state': 55, 'NN__solver': 'adam'} | 12 | 13 | 6  | 14 | 1  | 7  | 4  | 5 | 8  | 3  | 2 | 11 | 9  | 0 | 15 | 10 |
| 56 | MLP,<br>PI | {'NN__activation': 'identity', 'NN__alpha': 1,<br>'NN__hidden_layer_sizes': (5,),'NN__max_iter': 200,<br>'NN__random_state': 56, 'NN__solver': 'adam'} | 10 | 9  | 5  | 12 | 3  | 6  | 1  | 4 | 13 | 11 | 2 | 14 | 8  | 0 | 16 | 15 |
| 57 | MLP,<br>PI | {'NN__activation': 'identity', 'NN__alpha': 1,<br>'NN__hidden_layer_sizes': (5,),'NN__max_iter': 200,<br>'NN__random_state': 57, 'NN__solver': 'adam'} | 9  | 15 | 11 | 12 | 1  | 6  | 7  | 5 | 10 | 2  | 3 | 14 | 4  | 0 | 13 | 16 |
| 58 | MLP,<br>PI | {'NN__activation': 'identity', 'NN__alpha': 1,<br>'NN__hidden_layer_sizes': (5,),'NN__max_iter': 200,<br>'NN__random_state': 58, 'NN__solver': 'adam'} | 12 | 13 | 8  | 11 | 7  | 5  | 4  | 1 | 9  | 3  | 2 | 16 | 6  | 0 | 14 | 15 |
| 59 | MLP,<br>PI | {'NN__activation': 'identity', 'NN__alpha': 1,<br>'NN__hidden_layer_sizes': (5,),'NN__max_iter': 200,<br>'NN__random_state': 59, 'NN__solver': 'adam'} | 11 | 10 | 8  | 16 | 2  | 6  | 3  | 4 | 13 | 5  | 1 | 12 | 9  | 0 | 15 | 14 |
| 60 | MLP,<br>PI | {'NN__activation': 'identity', 'NN__alpha': 1,<br>'NN__hidden_layer_sizes': (5,),'NN__max_iter': 200,<br>'NN__random_state': 60, 'NN__solver': 'adam'} | 14 | 15 | 7  | 16 | 3  | 8  | 9  | 4 | 10 | 5  | 2 | 1  | 6  | 0 | 11 | 12 |
| 61 | MLP,<br>PI | {'NN__activation': 'identity', 'NN__alpha': 1,<br>'NN__hidden_layer_sizes': (5,),'NN__max_iter': 200,<br>'NN__random_state': 61, 'NN__solver': 'adam'} | 9  | 16 | 5  | 15 | 7  | 8  | 4  | 3 | 10 | 2  | 6 | 14 | 1  | 0 | 12 | 13 |
| 62 | MLP,<br>PI | {'NN__activation': 'identity', 'NN__alpha': 1,<br>'NN__hidden_layer_sizes': (5,),'NN__max_iter': 200,<br>'NN__random_state': 62, 'NN__solver': 'adam'} | 13 | 12 | 6  | 8  | 0  | 9  | 7  | 5 | 10 | 3  | 4 | 2  | 15 | 1 | 16 | 11 |
| 63 | MLP,<br>PI | {'NN__activation': 'identity', 'NN__alpha': 1,<br>'NN__hidden_layer_sizes': (5,),'NN__max_iter': 200,<br>'NN__random_state': 63, 'NN__solver': 'adam'} | 10 | 7  | 11 | 5  | 3  | 15 | 14 | 2 | 12 | 6  | 4 | 8  | 0  | 1 | 13 | 16 |
| 64 | MLP,<br>PI | {'NN__activation': 'identity', 'NN__alpha': 1,<br>'NN__hidden_layer_sizes': (5,),'NN__max_iter': 200,<br>'NN__random_state': 64, 'NN__solver': 'adam'} | 13 | 10 | 8  | 7  | 12 | 9  | 6  | 2 | 16 | 3  | 4 | 0  | 5  | 1 | 15 | 11 |

|    |            |                                                                                                                                                        |    |    |    |    |    |    |   |   |    |   |    |    |    |   |    |    |
|----|------------|--------------------------------------------------------------------------------------------------------------------------------------------------------|----|----|----|----|----|----|---|---|----|---|----|----|----|---|----|----|
| 65 | MLP,<br>PI | {'NN__activation': 'identity', 'NN__alpha': 1,<br>'NN__hidden_layer_sizes': (5,),'NN__max_iter': 200,<br>'NN__random_state': 65, 'NN__solver': 'adam'} | 14 | 12 | 7  | 13 | 5  | 16 | 6 | 4 | 15 | 3 | 2  | 1  | 8  | 0 | 10 | 11 |
| 66 | MLP,<br>PI | {'NN__activation': 'identity', 'NN__alpha': 1,<br>'NN__hidden_layer_sizes': (5,),'NN__max_iter': 200,<br>'NN__random_state': 66, 'NN__solver': 'adam'} | 9  | 12 | 7  | 10 | 2  | 3  | 6 | 5 | 8  | 1 | 16 | 11 | 4  | 0 | 15 | 13 |
| 67 | MLP,<br>PI | {'NN__activation': 'identity', 'NN__alpha': 1,<br>'NN__hidden_layer_sizes': (5,),'NN__max_iter': 200,<br>'NN__random_state': 67, 'NN__solver': 'adam'} | 13 | 10 | 12 | 5  | 6  | 2  | 9 | 4 | 11 | 3 | 7  | 8  | 1  | 0 | 16 | 14 |
| 68 | MLP,<br>PI | {'NN__activation': 'identity', 'NN__alpha': 1,<br>'NN__hidden_layer_sizes': (5,),'NN__max_iter': 200,<br>'NN__random_state': 68, 'NN__solver': 'adam'} | 16 | 13 | 10 | 11 | 4  | 5  | 6 | 2 | 9  | 3 | 1  | 8  | 12 | 0 | 14 | 15 |
| 69 | MLP,<br>PI | {'NN__activation': 'identity', 'NN__alpha': 1,<br>'NN__hidden_layer_sizes': (5,),'NN__max_iter': 200,<br>'NN__random_state': 69, 'NN__solver': 'adam'} | 15 | 12 | 9  | 13 | 4  | 7  | 6 | 3 | 11 | 2 | 5  | 1  | 8  | 0 | 16 | 14 |
| 70 | MLP,<br>PI | {'NN__activation': 'identity', 'NN__alpha': 1,<br>'NN__hidden_layer_sizes': (5,),'NN__max_iter': 200,<br>'NN__random_state': 70, 'NN__solver': 'adam'} | 10 | 8  | 12 | 11 | 14 | 4  | 7 | 2 | 13 | 3 | 6  | 1  | 5  | 0 | 15 | 16 |
| 71 | MLP,<br>PI | {'NN__activation': 'identity', 'NN__alpha': 1,<br>'NN__hidden_layer_sizes': (5,),'NN__max_iter': 200,<br>'NN__random_state': 71, 'NN__solver': 'adam'} | 15 | 11 | 16 | 6  | 1  | 8  | 9 | 7 | 12 | 5 | 3  | 0  | 4  | 2 | 14 | 13 |
| 72 | MLP,<br>PI | {'NN__activation': 'identity', 'NN__alpha': 1,<br>'NN__hidden_layer_sizes': (5,),'NN__max_iter': 200,<br>'NN__random_state': 72, 'NN__solver': 'adam'} | 13 | 10 | 8  | 16 | 2  | 7  | 5 | 4 | 11 | 1 | 3  | 6  | 9  | 0 | 12 | 15 |
| 73 | MLP,<br>PI | {'NN__activation': 'identity', 'NN__alpha': 1,<br>'NN__hidden_layer_sizes': (5,),'NN__max_iter': 200,<br>'NN__random_state': 73, 'NN__solver': 'adam'} | 14 | 10 | 6  | 8  | 9  | 12 | 7 | 4 | 16 | 2 | 5  | 0  | 3  | 1 | 15 | 11 |
| 74 | MLP,<br>PI | {'NN__activation': 'identity', 'NN__alpha': 1,<br>'NN__hidden_layer_sizes': (5,),'NN__max_iter': 200,<br>'NN__random_state': 74, 'NN__solver': 'adam'} | 15 | 11 | 7  | 16 | 3  | 9  | 6 | 8 | 14 | 4 | 5  | 0  | 2  | 1 | 12 | 10 |

|    |            |                                                                                                                                                        |    |    |    |    |    |   |   |    |    |    |    |    |    |   |    |    |  |
|----|------------|--------------------------------------------------------------------------------------------------------------------------------------------------------|----|----|----|----|----|---|---|----|----|----|----|----|----|---|----|----|--|
| 75 | MLP,<br>PI | {'NN__activation': 'identity', 'NN__alpha': 1,<br>'NN__hidden_layer_sizes': (5,),'NN__max_iter': 200,<br>'NN__random_state': 75, 'NN__solver': 'adam'} | 15 | 10 | 6  | 8  | 1  | 7 | 5 | 16 | 14 | 3  | 4  | 2  | 13 | 0 | 12 | 11 |  |
| 76 | MLP,<br>PI | {'NN__activation': 'identity', 'NN__alpha': 1,<br>'NN__hidden_layer_sizes': (5,),'NN__max_iter': 200,<br>'NN__random_state': 76, 'NN__solver': 'adam'} | 13 | 15 | 9  | 16 | 2  | 7 | 6 | 5  | 14 | 4  | 1  | 3  | 10 | 0 | 12 | 8  |  |
| 77 | MLP,<br>PI | {'NN__activation': 'identity', 'NN__alpha': 1,<br>'NN__hidden_layer_sizes': (5,),'NN__max_iter': 200,<br>'NN__random_state': 77, 'NN__solver': 'adam'} | 13 | 11 | 7  | 14 | 6  | 8 | 2 | 3  | 12 | 4  | 16 | 1  | 10 | 0 | 15 | 9  |  |
| 78 | MLP,<br>PI | {'NN__activation': 'identity', 'NN__alpha': 1,<br>'NN__hidden_layer_sizes': (5,),'NN__max_iter': 200,<br>'NN__random_state': 78, 'NN__solver': 'adam'} | 7  | 11 | 13 | 6  | 9  | 4 | 8 | 3  | 16 | 1  | 5  | 2  | 15 | 0 | 14 | 12 |  |
| 79 | MLP,<br>PI | {'NN__activation': 'identity', 'NN__alpha': 1,<br>'NN__hidden_layer_sizes': (5,),'NN__max_iter': 200,<br>'NN__random_state': 79, 'NN__solver': 'adam'} | 13 | 15 | 8  | 14 | 0  | 4 | 6 | 7  | 12 | 5  | 3  | 16 | 2  | 1 | 10 | 11 |  |
| 80 | MLP,<br>PI | {'NN__activation': 'identity', 'NN__alpha': 1,<br>'NN__hidden_layer_sizes': (5,),'NN__max_iter': 200,<br>'NN__random_state': 80, 'NN__solver': 'adam'} | 6  | 14 | 7  | 11 | 8  | 5 | 4 | 1  | 12 | 3  | 2  | 9  | 16 | 0 | 15 | 13 |  |
| 81 | MLP,<br>PI | {'NN__activation': 'identity', 'NN__alpha': 1,<br>'NN__hidden_layer_sizes': (5,),'NN__max_iter': 200,<br>'NN__random_state': 81, 'NN__solver': 'adam'} | 9  | 6  | 5  | 7  | 11 | 4 | 8 | 2  | 10 | 1  | 12 | 3  | 16 | 0 | 15 | 14 |  |
| 82 | MLP,<br>PI | {'NN__activation': 'identity', 'NN__alpha': 1,<br>'NN__hidden_layer_sizes': (5,),'NN__max_iter': 200,<br>'NN__random_state': 82, 'NN__solver': 'adam'} | 12 | 9  | 5  | 15 | 3  | 8 | 2 | 4  | 11 | 16 | 1  | 7  | 10 | 0 | 13 | 14 |  |
| 83 | MLP,<br>PI | {'NN__activation': 'identity', 'NN__alpha': 1,<br>'NN__hidden_layer_sizes': (5,),'NN__max_iter': 200,<br>'NN__random_state': 83, 'NN__solver': 'adam'} | 8  | 9  | 12 | 2  | 14 | 6 | 5 | 0  | 13 | 1  | 4  | 7  | 15 | 3 | 16 | 11 |  |
| 84 | MLP,<br>PI | {'NN__activation': 'identity', 'NN__alpha': 1,<br>'NN__hidden_layer_sizes': (5,),'NN__max_iter': 200,<br>'NN__random_state': 84, 'NN__solver': 'adam'} | 15 | 11 | 7  | 10 | 9  | 5 | 6 | 4  | 16 | 3  | 2  | 1  | 8  | 0 | 14 | 12 |  |

|    |            |                                                                                                                                                        |    |    |    |    |    |    |   |    |    |   |   |    |    |   |    |    |
|----|------------|--------------------------------------------------------------------------------------------------------------------------------------------------------|----|----|----|----|----|----|---|----|----|---|---|----|----|---|----|----|
| 85 | MLP,<br>PI | {'NN__activation': 'identity', 'NN__alpha': 1,<br>'NN__hidden_layer_sizes': (5,),'NN__max_iter': 200,<br>'NN__random_state': 85, 'NN__solver': 'adam'} | 13 | 11 | 6  | 14 | 2  | 4  | 8 | 1  | 10 | 5 | 3 | 9  | 12 | 0 | 15 | 16 |
| 86 | MLP,<br>PI | {'NN__activation': 'identity', 'NN__alpha': 1,<br>'NN__hidden_layer_sizes': (5,),'NN__max_iter': 200,<br>'NN__random_state': 86, 'NN__solver': 'adam'} | 8  | 10 | 9  | 16 | 4  | 7  | 6 | 2  | 12 | 1 | 3 | 5  | 14 | 0 | 15 | 13 |
| 87 | MLP,<br>PI | {'NN__activation': 'identity', 'NN__alpha': 1,<br>'NN__hidden_layer_sizes': (5,),'NN__max_iter': 200,<br>'NN__random_state': 87, 'NN__solver': 'adam'} | 13 | 12 | 7  | 16 | 2  | 6  | 8 | 5  | 9  | 3 | 4 | 1  | 10 | 0 | 15 | 14 |
| 88 | MLP,<br>PI | {'NN__activation': 'identity', 'NN__alpha': 1,<br>'NN__hidden_layer_sizes': (5,),'NN__max_iter': 200,<br>'NN__random_state': 88, 'NN__solver': 'adam'} | 10 | 14 | 13 | 8  | 7  | 5  | 6 | 1  | 12 | 3 | 2 | 9  | 11 | 0 | 16 | 15 |
| 89 | MLP,<br>PI | {'NN__activation': 'identity', 'NN__alpha': 1,<br>'NN__hidden_layer_sizes': (5,),'NN__max_iter': 200,<br>'NN__random_state': 89, 'NN__solver': 'adam'} | 10 | 9  | 13 | 11 | 3  | 7  | 4 | 5  | 14 | 2 | 6 | 16 | 1  | 0 | 15 | 12 |
| 90 | MLP,<br>PI | {'NN__activation': 'identity', 'NN__alpha': 1,<br>'NN__hidden_layer_sizes': (5,),'NN__max_iter': 200,<br>'NN__random_state': 90, 'NN__solver': 'adam'} | 13 | 14 | 12 | 16 | 3  | 11 | 7 | 4  | 10 | 5 | 1 | 0  | 2  | 6 | 15 | 8  |
| 91 | MLP,<br>PI | {'NN__activation': 'identity', 'NN__alpha': 1,<br>'NN__hidden_layer_sizes': (5,),'NN__max_iter': 200,<br>'NN__random_state': 91, 'NN__solver': 'adam'} | 13 | 12 | 7  | 11 | 3  | 6  | 4 | 16 | 14 | 5 | 2 | 1  | 8  | 0 | 15 | 10 |
| 92 | MLP,<br>PI | {'NN__activation': 'identity', 'NN__alpha': 1,<br>'NN__hidden_layer_sizes': (5,),'NN__max_iter': 200,<br>'NN__random_state': 92, 'NN__solver': 'adam'} | 15 | 10 | 8  | 14 | 4  | 9  | 7 | 6  | 13 | 5 | 2 | 0  | 3  | 1 | 16 | 12 |
| 93 | MLP,<br>PI | {'NN__activation': 'identity', 'NN__alpha': 1,<br>'NN__hidden_layer_sizes': (5,),'NN__max_iter': 200,<br>'NN__random_state': 93, 'NN__solver': 'adam'} | 14 | 9  | 8  | 5  | 13 | 7  | 6 | 3  | 15 | 4 | 2 | 1  | 12 | 0 | 16 | 11 |
| 94 | MLP,<br>PI | {'NN__activation': 'identity', 'NN__alpha': 1,<br>'NN__hidden_layer_sizes': (5,),'NN__max_iter': 200,<br>'NN__random_state': 94, 'NN__solver': 'adam'} | 15 | 7  | 9  | 2  | 4  | 8  | 3 | 10 | 14 | 5 | 6 | 1  | 12 | 0 | 16 | 11 |

|    |            |                                                                                                                                                  |    |    |    |    |   |    |    |   |    |   |   |    |    |   |    |    |
|----|------------|--------------------------------------------------------------------------------------------------------------------------------------------------|----|----|----|----|---|----|----|---|----|---|---|----|----|---|----|----|
| 95 | MLP,<br>PI | {'NN_activation': 'identity', 'NN_alpha': 1,<br>'NN_hidden_layer_sizes': (5,),'NN_max_iter': 200,<br>'NN_random_state': 95, 'NN_solver': 'adam'} | 8  | 11 | 14 | 15 | 7 | 5  | 10 | 1 | 12 | 4 | 9 | 13 | 3  | 0 | 16 | 6  |
| 96 | MLP,<br>PI | {'NN_activation': 'identity', 'NN_alpha': 1,<br>'NN_hidden_layer_sizes': (5,),'NN_max_iter': 200,<br>'NN_random_state': 96, 'NN_solver': 'adam'} | 13 | 11 | 8  | 9  | 0 | 5  | 7  | 6 | 14 | 4 | 3 | 2  | 16 | 1 | 10 | 15 |
| 97 | MLP,<br>PI | {'NN_activation': 'identity', 'NN_alpha': 1,<br>'NN_hidden_layer_sizes': (5,),'NN_max_iter': 200,<br>'NN_random_state': 97, 'NN_solver': 'adam'} | 13 | 9  | 3  | 16 | 4 | 8  | 5  | 1 | 11 | 2 | 6 | 7  | 12 | 0 | 15 | 10 |
| 98 | MLP,<br>PI | {'NN_activation': 'identity', 'NN_alpha': 1,<br>'NN_hidden_layer_sizes': (5,),'NN_max_iter': 200,<br>'NN_random_state': 98, 'NN_solver': 'adam'} | 14 | 7  | 4  | 9  | 6 | 16 | 2  | 1 | 15 | 5 | 3 | 8  | 12 | 0 | 13 | 11 |
| 99 | MLP,<br>PI | {'NN_activation': 'identity', 'NN_alpha': 1,<br>'NN_hidden_layer_sizes': (5,),'NN_max_iter': 200,<br>'NN_random_state': 99, 'NN_solver': 'adam'} | 16 | 10 | 5  | 6  | 9 | 11 | 7  | 8 | 13 | 4 | 2 | 0  | 3  | 1 | 12 | 15 |
| 0  | RF,<br>PI  | {'criterion': 'gini', 'max_depth': 2, 'max_features': 2,<br>'min_samples_leaf': 5, 'n_estimators': 500, 'n_jobs': -1,<br>'random_state': 0}      | 8  | 12 | 10 | 4  | 0 | 9  | 5  | 2 | 13 | 6 | 7 | 11 | 16 | 1 | 3  | 15 |
| 1  | RF,<br>PI  | {'criterion': 'gini', 'max_depth': 2, 'max_features': 2,<br>'min_samples_leaf': 5, 'n_estimators': 500, 'n_jobs': -1,<br>'random_state': 1}      | 4  | 14 | 9  | 8  | 0 | 10 | 7  | 3 | 12 | 2 | 5 | 11 | 15 | 1 | 6  | 16 |
| 2  | RF,<br>PI  | {'criterion': 'gini', 'max_depth': 2, 'max_features': 2,<br>'min_samples_leaf': 5, 'n_estimators': 500, 'n_jobs': -1,<br>'random_state': 2}      | 8  | 14 | 10 | 3  | 0 | 7  | 9  | 6 | 11 | 5 | 2 | 15 | 16 | 1 | 4  | 13 |
| 3  | RF,<br>PI  | {'criterion': 'gini', 'max_depth': 2, 'max_features': 2,<br>'min_samples_leaf': 5, 'n_estimators': 500, 'n_jobs': -1,<br>'random_state': 3}      | 5  | 12 | 10 | 8  | 0 | 9  | 6  | 2 | 13 | 4 | 3 | 14 | 16 | 1 | 7  | 15 |
| 4  | RF,<br>PI  | {'criterion': 'gini', 'max_depth': 2, 'max_features': 2,<br>'min_samples_leaf': 5, 'n_estimators': 500, 'n_jobs': -1,<br>'random_state': 4}      | 7  | 14 | 11 | 9  | 1 | 8  | 3  | 2 | 13 | 5 | 6 | 12 | 16 | 0 | 4  | 15 |

|    |           |                                                                                                                                        |   |    |    |    |   |   |   |   |    |   |   |    |    |   |   |    |
|----|-----------|----------------------------------------------------------------------------------------------------------------------------------------|---|----|----|----|---|---|---|---|----|---|---|----|----|---|---|----|
| 5  | RF,<br>PI | {'criterion': 'gini', 'max_depth': 2, 'max_features': 2, 'min_samples_leaf': 5, 'n_estimators': 500, 'n_jobs': -1, 'random_state': 5}  | 4 | 15 | 10 | 6  | 1 | 9 | 8 | 5 | 11 | 2 | 3 | 14 | 16 | 0 | 7 | 13 |
| 6  | RF,<br>PI | {'criterion': 'gini', 'max_depth': 2, 'max_features': 2, 'min_samples_leaf': 5, 'n_estimators': 500, 'n_jobs': -1, 'random_state': 6}  | 6 | 14 | 11 | 8  | 0 | 9 | 5 | 3 | 13 | 2 | 7 | 10 | 16 | 1 | 4 | 15 |
| 7  | RF,<br>PI | {'criterion': 'gini', 'max_depth': 2, 'max_features': 2, 'min_samples_leaf': 5, 'n_estimators': 500, 'n_jobs': -1, 'random_state': 7}  | 3 | 14 | 10 | 7  | 0 | 9 | 8 | 2 | 13 | 4 | 5 | 11 | 16 | 1 | 6 | 15 |
| 8  | RF,<br>PI | {'criterion': 'gini', 'max_depth': 2, 'max_features': 2, 'min_samples_leaf': 5, 'n_estimators': 500, 'n_jobs': -1, 'random_state': 8}  | 7 | 16 | 10 | 9  | 0 | 8 | 3 | 4 | 14 | 2 | 5 | 11 | 13 | 1 | 6 | 15 |
| 9  | RF,<br>PI | {'criterion': 'gini', 'max_depth': 2, 'max_features': 2, 'min_samples_leaf': 5, 'n_estimators': 500, 'n_jobs': -1, 'random_state': 9}  | 4 | 14 | 11 | 10 | 1 | 7 | 8 | 2 | 12 | 6 | 5 | 15 | 16 | 0 | 3 | 13 |
| 10 | RF,<br>PI | {'criterion': 'gini', 'max_depth': 2, 'max_features': 2, 'min_samples_leaf': 5, 'n_estimators': 500, 'n_jobs': -1, 'random_state': 10} | 9 | 14 | 10 | 8  | 1 | 7 | 5 | 3 | 13 | 4 | 2 | 12 | 16 | 0 | 6 | 15 |
| 11 | RF,<br>PI | {'criterion': 'gini', 'max_depth': 2, 'max_features': 2, 'min_samples_leaf': 5, 'n_estimators': 500, 'n_jobs': -1, 'random_state': 11} | 7 | 14 | 13 | 6  | 0 | 8 | 9 | 2 | 12 | 4 | 3 | 10 | 16 | 1 | 5 | 15 |
| 12 | RF,<br>PI | {'criterion': 'gini', 'max_depth': 2, 'max_features': 2, 'min_samples_leaf': 5, 'n_estimators': 500, 'n_jobs': -1, 'random_state': 12} | 3 | 14 | 10 | 7  | 1 | 9 | 8 | 5 | 15 | 4 | 2 | 12 | 16 | 0 | 6 | 13 |
| 13 | RF,<br>PI | {'criterion': 'gini', 'max_depth': 2, 'max_features': 2, 'min_samples_leaf': 5, 'n_estimators': 500, 'n_jobs': -1, 'random_state': 13} | 6 | 14 | 11 | 4  | 1 | 7 | 8 | 2 | 13 | 5 | 9 | 10 | 16 | 0 | 3 | 15 |
| 14 | RF,<br>PI | {'criterion': 'gini', 'max_depth': 2, 'max_features': 2, 'min_samples_leaf': 5, 'n_estimators': 500, 'n_jobs': -1, 'random_state': 14} | 9 | 15 | 10 | 6  | 1 | 7 | 4 | 2 | 14 | 3 | 5 | 11 | 16 | 0 | 8 | 13 |



|    |           |                                                                                                                                        |   |    |    |   |   |    |   |   |    |   |   |    |    |   |   |    |
|----|-----------|----------------------------------------------------------------------------------------------------------------------------------------|---|----|----|---|---|----|---|---|----|---|---|----|----|---|---|----|
| 15 | RF,<br>PI | {'criterion': 'gini', 'max_depth': 2, 'max_features': 2, 'min_samples_leaf': 5, 'n_estimators': 500, 'n_jobs': -1, 'random_state': 15} | 6 | 15 | 11 | 9 | 1 | 8  | 7 | 3 | 12 | 4 | 2 | 10 | 14 | 0 | 5 | 16 |
| 16 | RF,<br>PI | {'criterion': 'gini', 'max_depth': 2, 'max_features': 2, 'min_samples_leaf': 5, 'n_estimators': 500, 'n_jobs': -1, 'random_state': 16} | 6 | 14 | 10 | 9 | 0 | 8  | 2 | 4 | 11 | 3 | 5 | 15 | 16 | 1 | 7 | 13 |
| 17 | RF,<br>PI | {'criterion': 'gini', 'max_depth': 2, 'max_features': 2, 'min_samples_leaf': 5, 'n_estimators': 500, 'n_jobs': -1, 'random_state': 17} | 7 | 14 | 10 | 5 | 0 | 9  | 8 | 2 | 13 | 4 | 6 | 11 | 16 | 1 | 3 | 15 |
| 18 | RF,<br>PI | {'criterion': 'gini', 'max_depth': 2, 'max_features': 2, 'min_samples_leaf': 5, 'n_estimators': 500, 'n_jobs': -1, 'random_state': 18} | 8 | 15 | 10 | 2 | 1 | 9  | 5 | 3 | 13 | 7 | 4 | 12 | 16 | 0 | 6 | 14 |
| 19 | RF,<br>PI | {'criterion': 'gini', 'max_depth': 2, 'max_features': 2, 'min_samples_leaf': 5, 'n_estimators': 500, 'n_jobs': -1, 'random_state': 19} | 6 | 14 | 10 | 5 | 0 | 8  | 9 | 2 | 13 | 3 | 4 | 11 | 16 | 1 | 7 | 15 |
| 20 | RF,<br>PI | {'criterion': 'gini', 'max_depth': 2, 'max_features': 2, 'min_samples_leaf': 5, 'n_estimators': 500, 'n_jobs': -1, 'random_state': 20} | 4 | 13 | 10 | 6 | 1 | 9  | 8 | 2 | 14 | 3 | 5 | 11 | 16 | 0 | 7 | 15 |
| 21 | RF,<br>PI | {'criterion': 'gini', 'max_depth': 2, 'max_features': 2, 'min_samples_leaf': 5, 'n_estimators': 500, 'n_jobs': -1, 'random_state': 21} | 9 | 13 | 11 | 5 | 1 | 6  | 8 | 7 | 15 | 2 | 3 | 10 | 16 | 0 | 4 | 14 |
| 22 | RF,<br>PI | {'criterion': 'gini', 'max_depth': 2, 'max_features': 2, 'min_samples_leaf': 5, 'n_estimators': 500, 'n_jobs': -1, 'random_state': 22} | 4 | 15 | 10 | 9 | 0 | 6  | 3 | 8 | 13 | 2 | 5 | 11 | 16 | 1 | 7 | 14 |
| 23 | RF,<br>PI | {'criterion': 'gini', 'max_depth': 2, 'max_features': 2, 'min_samples_leaf': 5, 'n_estimators': 500, 'n_jobs': -1, 'random_state': 23} | 5 | 15 | 11 | 7 | 0 | 12 | 6 | 3 | 13 | 4 | 2 | 10 | 16 | 1 | 8 | 14 |
| 24 | RF,<br>PI | {'criterion': 'gini', 'max_depth': 2, 'max_features': 2, 'min_samples_leaf': 5, 'n_estimators': 500, 'n_jobs': -1, 'random_state': 24} | 5 | 14 | 10 | 8 | 1 | 9  | 4 | 3 | 13 | 2 | 6 | 12 | 16 | 0 | 7 | 15 |

|    |           |                                                                                                                                        |   |    |    |   |   |    |   |   |    |   |   |    |    |   |   |    |
|----|-----------|----------------------------------------------------------------------------------------------------------------------------------------|---|----|----|---|---|----|---|---|----|---|---|----|----|---|---|----|
| 25 | RF,<br>PI | {'criterion': 'gini', 'max_depth': 2, 'max_features': 2, 'min_samples_leaf': 5, 'n_estimators': 500, 'n_jobs': -1, 'random_state': 25} | 5 | 14 | 10 | 9 | 0 | 7  | 2 | 3 | 13 | 6 | 8 | 12 | 16 | 1 | 4 | 15 |
| 26 | RF,<br>PI | {'criterion': 'gini', 'max_depth': 2, 'max_features': 2, 'min_samples_leaf': 5, 'n_estimators': 500, 'n_jobs': -1, 'random_state': 26} | 6 | 15 | 11 | 7 | 0 | 10 | 5 | 3 | 13 | 8 | 2 | 9  | 16 | 1 | 4 | 14 |
| 27 | RF,<br>PI | {'criterion': 'gini', 'max_depth': 2, 'max_features': 2, 'min_samples_leaf': 5, 'n_estimators': 500, 'n_jobs': -1, 'random_state': 27} | 4 | 15 | 10 | 9 | 1 | 8  | 6 | 5 | 12 | 2 | 3 | 14 | 16 | 0 | 7 | 13 |
| 28 | RF,<br>PI | {'criterion': 'gini', 'max_depth': 2, 'max_features': 2, 'min_samples_leaf': 5, 'n_estimators': 500, 'n_jobs': -1, 'random_state': 28} | 6 | 15 | 10 | 3 | 1 | 9  | 8 | 2 | 13 | 5 | 4 | 11 | 16 | 0 | 7 | 14 |
| 29 | RF,<br>PI | {'criterion': 'gini', 'max_depth': 2, 'max_features': 2, 'min_samples_leaf': 5, 'n_estimators': 500, 'n_jobs': -1, 'random_state': 29} | 5 | 14 | 12 | 8 | 1 | 6  | 7 | 2 | 13 | 3 | 4 | 10 | 16 | 0 | 9 | 15 |
| 30 | RF,<br>PI | {'criterion': 'gini', 'max_depth': 2, 'max_features': 2, 'min_samples_leaf': 5, 'n_estimators': 500, 'n_jobs': -1, 'random_state': 30} | 7 | 15 | 13 | 4 | 1 | 9  | 8 | 2 | 11 | 3 | 5 | 12 | 16 | 0 | 6 | 14 |
| 31 | RF,<br>PI | {'criterion': 'gini', 'max_depth': 2, 'max_features': 2, 'min_samples_leaf': 5, 'n_estimators': 500, 'n_jobs': -1, 'random_state': 31} | 7 | 14 | 10 | 4 | 0 | 8  | 5 | 6 | 16 | 3 | 2 | 11 | 15 | 1 | 9 | 13 |
| 32 | RF,<br>PI | {'criterion': 'gini', 'max_depth': 2, 'max_features': 2, 'min_samples_leaf': 5, 'n_estimators': 500, 'n_jobs': -1, 'random_state': 32} | 4 | 15 | 10 | 5 | 1 | 9  | 6 | 3 | 13 | 8 | 2 | 11 | 16 | 0 | 7 | 14 |
| 33 | RF,<br>PI | {'criterion': 'gini', 'max_depth': 2, 'max_features': 2, 'min_samples_leaf': 5, 'n_estimators': 500, 'n_jobs': -1, 'random_state': 33} | 6 | 13 | 10 | 3 | 1 | 9  | 8 | 4 | 12 | 2 | 5 | 15 | 16 | 0 | 7 | 14 |
| 34 | RF,<br>PI | {'criterion': 'gini', 'max_depth': 2, 'max_features': 2, 'min_samples_leaf': 5, 'n_estimators': 500, 'n_jobs': -1, 'random_state': 34} | 7 | 14 | 12 | 5 | 0 | 9  | 4 | 3 | 13 | 2 | 6 | 10 | 16 | 1 | 8 | 15 |

|    |           |                                                                                                                                        |   |    |    |    |   |    |   |   |    |   |   |    |    |   |   |    |
|----|-----------|----------------------------------------------------------------------------------------------------------------------------------------|---|----|----|----|---|----|---|---|----|---|---|----|----|---|---|----|
| 35 | RF,<br>PI | {'criterion': 'gini', 'max_depth': 2, 'max_features': 2, 'min_samples_leaf': 5, 'n_estimators': 500, 'n_jobs': -1, 'random_state': 35} | 2 | 13 | 7  | 9  | 0 | 10 | 6 | 3 | 14 | 4 | 8 | 11 | 16 | 1 | 5 | 15 |
| 36 | RF,<br>PI | {'criterion': 'gini', 'max_depth': 2, 'max_features': 2, 'min_samples_leaf': 5, 'n_estimators': 500, 'n_jobs': -1, 'random_state': 36} | 6 | 16 | 11 | 8  | 0 | 9  | 5 | 2 | 13 | 3 | 4 | 10 | 15 | 1 | 7 | 14 |
| 37 | RF,<br>PI | {'criterion': 'gini', 'max_depth': 2, 'max_features': 2, 'min_samples_leaf': 5, 'n_estimators': 500, 'n_jobs': -1, 'random_state': 37} | 2 | 15 | 10 | 7  | 0 | 9  | 6 | 3 | 13 | 4 | 8 | 11 | 16 | 1 | 5 | 14 |
| 38 | RF,<br>PI | {'criterion': 'gini', 'max_depth': 2, 'max_features': 2, 'min_samples_leaf': 5, 'n_estimators': 500, 'n_jobs': -1, 'random_state': 38} | 4 | 14 | 12 | 7  | 0 | 9  | 3 | 2 | 13 | 5 | 6 | 10 | 16 | 1 | 8 | 15 |
| 39 | RF,<br>PI | {'criterion': 'gini', 'max_depth': 2, 'max_features': 2, 'min_samples_leaf': 5, 'n_estimators': 500, 'n_jobs': -1, 'random_state': 39} | 5 | 15 | 8  | 10 | 0 | 9  | 6 | 3 | 13 | 2 | 4 | 11 | 16 | 1 | 7 | 14 |
| 40 | RF,<br>PI | {'criterion': 'gini', 'max_depth': 2, 'max_features': 2, 'min_samples_leaf': 5, 'n_estimators': 500, 'n_jobs': -1, 'random_state': 40} | 5 | 14 | 8  | 10 | 1 | 9  | 4 | 7 | 13 | 2 | 3 | 11 | 15 | 0 | 6 | 16 |
| 41 | RF,<br>PI | {'criterion': 'gini', 'max_depth': 2, 'max_features': 2, 'min_samples_leaf': 5, 'n_estimators': 500, 'n_jobs': -1, 'random_state': 41} | 3 | 14 | 9  | 10 | 0 | 8  | 7 | 2 | 13 | 4 | 6 | 11 | 16 | 1 | 5 | 15 |
| 42 | RF,<br>PI | {'criterion': 'gini', 'max_depth': 2, 'max_features': 2, 'min_samples_leaf': 5, 'n_estimators': 500, 'n_jobs': -1, 'random_state': 42} | 4 | 15 | 10 | 8  | 1 | 7  | 9 | 2 | 12 | 3 | 6 | 14 | 16 | 0 | 5 | 13 |
| 43 | RF,<br>PI | {'criterion': 'gini', 'max_depth': 2, 'max_features': 2, 'min_samples_leaf': 5, 'n_estimators': 500, 'n_jobs': -1, 'random_state': 43} | 7 | 15 | 10 | 8  | 0 | 9  | 5 | 2 | 12 | 4 | 3 | 11 | 16 | 1 | 6 | 14 |
| 44 | RF,<br>PI | {'criterion': 'gini', 'max_depth': 2, 'max_features': 2, 'min_samples_leaf': 5, 'n_estimators': 500, 'n_jobs': -1, 'random_state': 44} | 5 | 14 | 11 | 4  | 1 | 9  | 8 | 2 | 13 | 3 | 6 | 12 | 16 | 0 | 7 | 15 |

|    |           |                                                                                                                                        |   |    |    |   |   |    |   |   |    |   |   |    |    |   |   |    |
|----|-----------|----------------------------------------------------------------------------------------------------------------------------------------|---|----|----|---|---|----|---|---|----|---|---|----|----|---|---|----|
| 45 | RF,<br>PI | {'criterion': 'gini', 'max_depth': 2, 'max_features': 2, 'min_samples_leaf': 5, 'n_estimators': 500, 'n_jobs': -1, 'random_state': 45} | 8 | 15 | 10 | 2 | 1 | 9  | 4 | 3 | 11 | 6 | 5 | 12 | 16 | 0 | 7 | 14 |
| 46 | RF,<br>PI | {'criterion': 'gini', 'max_depth': 2, 'max_features': 2, 'min_samples_leaf': 5, 'n_estimators': 500, 'n_jobs': -1, 'random_state': 46} | 2 | 16 | 9  | 7 | 1 | 11 | 3 | 4 | 13 | 6 | 5 | 10 | 14 | 0 | 8 | 15 |
| 47 | RF,<br>PI | {'criterion': 'gini', 'max_depth': 2, 'max_features': 2, 'min_samples_leaf': 5, 'n_estimators': 500, 'n_jobs': -1, 'random_state': 47} | 5 | 13 | 10 | 8 | 0 | 9  | 3 | 2 | 12 | 7 | 4 | 14 | 16 | 1 | 6 | 15 |
| 48 | RF,<br>PI | {'criterion': 'gini', 'max_depth': 2, 'max_features': 2, 'min_samples_leaf': 5, 'n_estimators': 500, 'n_jobs': -1, 'random_state': 48} | 5 | 16 | 10 | 8 | 1 | 9  | 6 | 3 | 14 | 2 | 7 | 11 | 15 | 0 | 4 | 13 |
| 49 | RF,<br>PI | {'criterion': 'gini', 'max_depth': 2, 'max_features': 2, 'min_samples_leaf': 5, 'n_estimators': 500, 'n_jobs': -1, 'random_state': 49} | 3 | 14 | 9  | 8 | 0 | 11 | 5 | 2 | 13 | 7 | 4 | 10 | 16 | 1 | 6 | 15 |
| 50 | RF,<br>PI | {'criterion': 'gini', 'max_depth': 2, 'max_features': 2, 'min_samples_leaf': 5, 'n_estimators': 500, 'n_jobs': -1, 'random_state': 50} | 7 | 15 | 12 | 2 | 1 | 8  | 5 | 3 | 13 | 6 | 4 | 10 | 16 | 0 | 9 | 14 |
| 51 | RF,<br>PI | {'criterion': 'gini', 'max_depth': 2, 'max_features': 2, 'min_samples_leaf': 5, 'n_estimators': 500, 'n_jobs': -1, 'random_state': 51} | 5 | 15 | 9  | 6 | 1 | 10 | 8 | 2 | 13 | 3 | 4 | 11 | 16 | 0 | 7 | 14 |
| 52 | RF,<br>PI | {'criterion': 'gini', 'max_depth': 2, 'max_features': 2, 'min_samples_leaf': 5, 'n_estimators': 500, 'n_jobs': -1, 'random_state': 52} | 6 | 13 | 9  | 3 | 0 | 10 | 8 | 2 | 14 | 4 | 5 | 12 | 16 | 1 | 7 | 15 |
| 53 | RF,<br>PI | {'criterion': 'gini', 'max_depth': 2, 'max_features': 2, 'min_samples_leaf': 5, 'n_estimators': 500, 'n_jobs': -1, 'random_state': 53} | 4 | 15 | 13 | 9 | 0 | 6  | 8 | 7 | 11 | 2 | 5 | 10 | 16 | 1 | 3 | 14 |
| 54 | RF,<br>PI | {'criterion': 'gini', 'max_depth': 2, 'max_features': 2, 'min_samples_leaf': 5, 'n_estimators': 500, 'n_jobs': -1, 'random_state': 54} | 4 | 15 | 11 | 6 | 0 | 8  | 9 | 5 | 14 | 3 | 2 | 10 | 13 | 1 | 7 | 16 |

|    |           |                                                                                                                                              |   |    |    |    |   |    |    |   |    |   |   |    |    |   |   |    |
|----|-----------|----------------------------------------------------------------------------------------------------------------------------------------------|---|----|----|----|---|----|----|---|----|---|---|----|----|---|---|----|
| 55 | RF,<br>PI | {'criterion': 'gini', 'max_depth': 2, 'max_features': 2,<br>'min_samples_leaf': 5, 'n_estimators': 500, 'n_jobs': -1,<br>'random_state': 55} | 7 | 14 | 11 | 8  | 1 | 9  | 4  | 3 | 13 | 2 | 5 | 12 | 16 | 0 | 6 | 15 |
| 56 | RF,<br>PI | {'criterion': 'gini', 'max_depth': 2, 'max_features': 2,<br>'min_samples_leaf': 5, 'n_estimators': 500, 'n_jobs': -1,<br>'random_state': 56} | 5 | 13 | 10 | 9  | 1 | 8  | 3  | 2 | 14 | 4 | 6 | 12 | 16 | 0 | 7 | 15 |
| 57 | RF,<br>PI | {'criterion': 'gini', 'max_depth': 2, 'max_features': 2,<br>'min_samples_leaf': 5, 'n_estimators': 500, 'n_jobs': -1,<br>'random_state': 57} | 5 | 15 | 11 | 8  | 1 | 9  | 7  | 4 | 14 | 2 | 3 | 10 | 16 | 0 | 6 | 13 |
| 58 | RF,<br>PI | {'criterion': 'gini', 'max_depth': 2, 'max_features': 2,<br>'min_samples_leaf': 5, 'n_estimators': 500, 'n_jobs': -1,<br>'random_state': 58} | 3 | 15 | 9  | 8  | 0 | 6  | 10 | 2 | 12 | 4 | 7 | 11 | 16 | 1 | 5 | 14 |
| 59 | RF,<br>PI | {'criterion': 'gini', 'max_depth': 2, 'max_features': 2,<br>'min_samples_leaf': 5, 'n_estimators': 500, 'n_jobs': -1,<br>'random_state': 59} | 4 | 12 | 10 | 5  | 1 | 9  | 8  | 2 | 13 | 3 | 6 | 15 | 16 | 0 | 7 | 14 |
| 60 | RF,<br>PI | {'criterion': 'gini', 'max_depth': 2, 'max_features': 2,<br>'min_samples_leaf': 5, 'n_estimators': 500, 'n_jobs': -1,<br>'random_state': 60} | 6 | 14 | 10 | 8  | 0 | 9  | 4  | 3 | 11 | 5 | 2 | 13 | 16 | 1 | 7 | 15 |
| 61 | RF,<br>PI | {'criterion': 'gini', 'max_depth': 2, 'max_features': 2,<br>'min_samples_leaf': 5, 'n_estimators': 500, 'n_jobs': -1,<br>'random_state': 61} | 3 | 14 | 8  | 12 | 1 | 10 | 7  | 2 | 13 | 6 | 4 | 11 | 16 | 0 | 5 | 15 |
| 62 | RF,<br>PI | {'criterion': 'gini', 'max_depth': 2, 'max_features': 2,<br>'min_samples_leaf': 5, 'n_estimators': 500, 'n_jobs': -1,<br>'random_state': 62} | 4 | 13 | 9  | 8  | 1 | 10 | 7  | 2 | 14 | 3 | 5 | 12 | 16 | 0 | 6 | 15 |
| 63 | RF,<br>PI | {'criterion': 'gini', 'max_depth': 2, 'max_features': 2,<br>'min_samples_leaf': 5, 'n_estimators': 500, 'n_jobs': -1,<br>'random_state': 63} | 3 | 14 | 11 | 8  | 0 | 7  | 6  | 4 | 13 | 2 | 5 | 10 | 16 | 1 | 9 | 15 |
| 64 | RF,<br>PI | {'criterion': 'gini', 'max_depth': 2, 'max_features': 2,<br>'min_samples_leaf': 5, 'n_estimators': 500, 'n_jobs': -1,<br>'random_state': 64} | 8 | 15 | 9  | 7  | 0 | 10 | 5  | 2 | 14 | 3 | 4 | 11 | 13 | 1 | 6 | 16 |

|    |           |                                                                                                                                              |   |    |    |    |   |    |   |   |    |   |   |    |    |   |   |    |
|----|-----------|----------------------------------------------------------------------------------------------------------------------------------------------|---|----|----|----|---|----|---|---|----|---|---|----|----|---|---|----|
| 65 | RF,<br>PI | {'criterion': 'gini', 'max_depth': 2, 'max_features': 2,<br>'min_samples_leaf': 5, 'n_estimators': 500, 'n_jobs': -1,<br>'random_state': 65} | 4 | 15 | 10 | 8  | 1 | 9  | 7 | 2 | 12 | 5 | 3 | 11 | 16 | 0 | 6 | 14 |
| 66 | RF,<br>PI | {'criterion': 'gini', 'max_depth': 2, 'max_features': 2,<br>'min_samples_leaf': 5, 'n_estimators': 500, 'n_jobs': -1,<br>'random_state': 66} | 4 | 14 | 10 | 3  | 0 | 8  | 9 | 5 | 13 | 2 | 6 | 12 | 16 | 1 | 7 | 15 |
| 67 | RF,<br>PI | {'criterion': 'gini', 'max_depth': 2, 'max_features': 2,<br>'min_samples_leaf': 5, 'n_estimators': 500, 'n_jobs': -1,<br>'random_state': 67} | 4 | 14 | 10 | 5  | 0 | 9  | 6 | 2 | 12 | 3 | 7 | 15 | 16 | 1 | 8 | 13 |
| 68 | RF,<br>PI | {'criterion': 'gini', 'max_depth': 2, 'max_features': 2,<br>'min_samples_leaf': 5, 'n_estimators': 500, 'n_jobs': -1,<br>'random_state': 68} | 6 | 15 | 12 | 8  | 1 | 9  | 4 | 2 | 14 | 3 | 7 | 10 | 16 | 0 | 5 | 13 |
| 69 | RF,<br>PI | {'criterion': 'gini', 'max_depth': 2, 'max_features': 2,<br>'min_samples_leaf': 5, 'n_estimators': 500, 'n_jobs': -1,<br>'random_state': 69} | 6 | 15 | 9  | 4  | 1 | 10 | 8 | 2 | 14 | 3 | 7 | 12 | 16 | 0 | 5 | 13 |
| 70 | RF,<br>PI | {'criterion': 'gini', 'max_depth': 2, 'max_features': 2,<br>'min_samples_leaf': 5, 'n_estimators': 500, 'n_jobs': -1,<br>'random_state': 70} | 5 | 15 | 10 | 8  | 1 | 9  | 2 | 3 | 13 | 4 | 6 | 11 | 16 | 0 | 7 | 14 |
| 71 | RF,<br>PI | {'criterion': 'gini', 'max_depth': 2, 'max_features': 2,<br>'min_samples_leaf': 5, 'n_estimators': 500, 'n_jobs': -1,<br>'random_state': 71} | 4 | 14 | 9  | 12 | 1 | 6  | 8 | 3 | 13 | 7 | 2 | 10 | 16 | 0 | 5 | 15 |
| 72 | RF,<br>PI | {'criterion': 'gini', 'max_depth': 2, 'max_features': 2,<br>'min_samples_leaf': 5, 'n_estimators': 500, 'n_jobs': -1,<br>'random_state': 72} | 9 | 14 | 12 | 8  | 1 | 7  | 5 | 3 | 13 | 4 | 2 | 10 | 16 | 0 | 6 | 15 |
| 73 | RF,<br>PI | {'criterion': 'gini', 'max_depth': 2, 'max_features': 2,<br>'min_samples_leaf': 5, 'n_estimators': 500, 'n_jobs': -1,<br>'random_state': 73} | 6 | 14 | 10 | 5  | 0 | 9  | 8 | 2 | 12 | 3 | 4 | 13 | 16 | 1 | 7 | 15 |
| 74 | RF,<br>PI | {'criterion': 'gini', 'max_depth': 2, 'max_features': 2,<br>'min_samples_leaf': 5, 'n_estimators': 500, 'n_jobs': -1,<br>'random_state': 74} | 4 | 15 | 10 | 2  | 1 | 9  | 7 | 5 | 13 | 3 | 8 | 14 | 16 | 0 | 6 | 12 |

|    |           |                                                                                                                                        |   |    |    |    |   |    |   |   |    |   |   |    |    |   |   |    |
|----|-----------|----------------------------------------------------------------------------------------------------------------------------------------|---|----|----|----|---|----|---|---|----|---|---|----|----|---|---|----|
| 75 | RF,<br>PI | {'criterion': 'gini', 'max_depth': 2, 'max_features': 2, 'min_samples_leaf': 5, 'n_estimators': 500, 'n_jobs': -1, 'random_state': 75} | 7 | 13 | 9  | 2  | 1 | 10 | 6 | 4 | 12 | 3 | 5 | 11 | 16 | 0 | 8 | 15 |
| 76 | RF,<br>PI | {'criterion': 'gini', 'max_depth': 2, 'max_features': 2, 'min_samples_leaf': 5, 'n_estimators': 500, 'n_jobs': -1, 'random_state': 76} | 2 | 13 | 10 | 8  | 1 | 9  | 7 | 3 | 12 | 5 | 4 | 15 | 16 | 0 | 6 | 14 |
| 77 | RF,<br>PI | {'criterion': 'gini', 'max_depth': 2, 'max_features': 2, 'min_samples_leaf': 5, 'n_estimators': 500, 'n_jobs': -1, 'random_state': 77} | 4 | 13 | 12 | 7  | 1 | 9  | 5 | 3 | 14 | 2 | 8 | 10 | 16 | 0 | 6 | 15 |
| 78 | RF,<br>PI | {'criterion': 'gini', 'max_depth': 2, 'max_features': 2, 'min_samples_leaf': 5, 'n_estimators': 500, 'n_jobs': -1, 'random_state': 78} | 5 | 15 | 11 | 4  | 0 | 9  | 6 | 3 | 13 | 2 | 7 | 10 | 16 | 1 | 8 | 14 |
| 79 | RF,<br>PI | {'criterion': 'gini', 'max_depth': 2, 'max_features': 2, 'min_samples_leaf': 5, 'n_estimators': 500, 'n_jobs': -1, 'random_state': 79} | 7 | 16 | 11 | 5  | 0 | 9  | 8 | 2 | 13 | 3 | 6 | 10 | 15 | 1 | 4 | 14 |
| 80 | RF,<br>PI | {'criterion': 'gini', 'max_depth': 2, 'max_features': 2, 'min_samples_leaf': 5, 'n_estimators': 500, 'n_jobs': -1, 'random_state': 80} | 5 | 15 | 12 | 6  | 1 | 9  | 4 | 3 | 11 | 2 | 7 | 14 | 16 | 0 | 8 | 13 |
| 81 | RF,<br>PI | {'criterion': 'gini', 'max_depth': 2, 'max_features': 2, 'min_samples_leaf': 5, 'n_estimators': 500, 'n_jobs': -1, 'random_state': 81} | 4 | 15 | 9  | 3  | 0 | 10 | 8 | 6 | 13 | 7 | 2 | 11 | 16 | 1 | 5 | 14 |
| 82 | RF,<br>PI | {'criterion': 'gini', 'max_depth': 2, 'max_features': 2, 'min_samples_leaf': 5, 'n_estimators': 500, 'n_jobs': -1, 'random_state': 82} | 3 | 14 | 10 | 8  | 1 | 9  | 5 | 2 | 13 | 4 | 7 | 12 | 16 | 0 | 6 | 15 |
| 83 | RF,<br>PI | {'criterion': 'gini', 'max_depth': 2, 'max_features': 2, 'min_samples_leaf': 5, 'n_estimators': 500, 'n_jobs': -1, 'random_state': 83} | 4 | 15 | 11 | 8  | 0 | 9  | 6 | 2 | 13 | 3 | 5 | 10 | 16 | 1 | 7 | 14 |
| 84 | RF,<br>PI | {'criterion': 'gini', 'max_depth': 2, 'max_features': 2, 'min_samples_leaf': 5, 'n_estimators': 500, 'n_jobs': -1, 'random_state': 84} | 6 | 14 | 9  | 10 | 0 | 7  | 8 | 2 | 13 | 5 | 4 | 11 | 16 | 1 | 3 | 15 |

|    |           |                                                                                                                                        |   |    |    |   |   |    |   |   |    |   |   |    |    |   |   |    |
|----|-----------|----------------------------------------------------------------------------------------------------------------------------------------|---|----|----|---|---|----|---|---|----|---|---|----|----|---|---|----|
| 85 | RF,<br>PI | {'criterion': 'gini', 'max_depth': 2, 'max_features': 2, 'min_samples_leaf': 5, 'n_estimators': 500, 'n_jobs': -1, 'random_state': 85} | 4 | 14 | 10 | 9 | 1 | 8  | 7 | 3 | 13 | 5 | 6 | 11 | 16 | 0 | 2 | 15 |
| 86 | RF,<br>PI | {'criterion': 'gini', 'max_depth': 2, 'max_features': 2, 'min_samples_leaf': 5, 'n_estimators': 500, 'n_jobs': -1, 'random_state': 86} | 5 | 14 | 9  | 7 | 1 | 10 | 8 | 2 | 13 | 3 | 6 | 12 | 16 | 0 | 4 | 15 |
| 87 | RF,<br>PI | {'criterion': 'gini', 'max_depth': 2, 'max_features': 2, 'min_samples_leaf': 5, 'n_estimators': 500, 'n_jobs': -1, 'random_state': 87} | 6 | 13 | 9  | 8 | 0 | 10 | 7 | 2 | 14 | 4 | 3 | 12 | 16 | 1 | 5 | 15 |
| 88 | RF,<br>PI | {'criterion': 'gini', 'max_depth': 2, 'max_features': 2, 'min_samples_leaf': 5, 'n_estimators': 500, 'n_jobs': -1, 'random_state': 88} | 7 | 14 | 10 | 4 | 0 | 11 | 6 | 2 | 13 | 3 | 8 | 9  | 16 | 1 | 5 | 15 |
| 89 | RF,<br>PI | {'criterion': 'gini', 'max_depth': 2, 'max_features': 2, 'min_samples_leaf': 5, 'n_estimators': 500, 'n_jobs': -1, 'random_state': 89} | 5 | 16 | 12 | 8 | 0 | 10 | 6 | 3 | 13 | 2 | 4 | 9  | 15 | 1 | 7 | 14 |
| 90 | RF,<br>PI | {'criterion': 'gini', 'max_depth': 2, 'max_features': 2, 'min_samples_leaf': 5, 'n_estimators': 500, 'n_jobs': -1, 'random_state': 90} | 6 | 15 | 12 | 7 | 1 | 10 | 8 | 2 | 14 | 4 | 5 | 9  | 16 | 0 | 3 | 13 |
| 91 | RF,<br>PI | {'criterion': 'gini', 'max_depth': 2, 'max_features': 2, 'min_samples_leaf': 5, 'n_estimators': 500, 'n_jobs': -1, 'random_state': 91} | 4 | 15 | 10 | 8 | 1 | 9  | 6 | 3 | 12 | 2 | 7 | 13 | 16 | 0 | 5 | 14 |
| 92 | RF,<br>PI | {'criterion': 'gini', 'max_depth': 2, 'max_features': 2, 'min_samples_leaf': 5, 'n_estimators': 500, 'n_jobs': -1, 'random_state': 92} | 6 | 13 | 11 | 3 | 0 | 9  | 2 | 4 | 15 | 7 | 5 | 10 | 16 | 1 | 8 | 14 |
| 93 | RF,<br>PI | {'criterion': 'gini', 'max_depth': 2, 'max_features': 2, 'min_samples_leaf': 5, 'n_estimators': 500, 'n_jobs': -1, 'random_state': 93} | 6 | 15 | 10 | 4 | 1 | 7  | 8 | 3 | 13 | 5 | 2 | 11 | 16 | 0 | 9 | 14 |
| 94 | RF,<br>PI | {'criterion': 'gini', 'max_depth': 2, 'max_features': 2, 'min_samples_leaf': 5, 'n_estimators': 500, 'n_jobs': -1, 'random_state': 94} | 4 | 13 | 10 | 2 | 0 | 6  | 7 | 3 | 14 | 8 | 9 | 11 | 16 | 1 | 5 | 15 |



|    |            |                                                                                                                                        |   |    |    |   |   |    |   |   |    |    |    |    |    |   |   |    |
|----|------------|----------------------------------------------------------------------------------------------------------------------------------------|---|----|----|---|---|----|---|---|----|----|----|----|----|---|---|----|
| 95 | RF,<br>PI  | {'criterion': 'gini', 'max_depth': 2, 'max_features': 2, 'min_samples_leaf': 5, 'n_estimators': 500, 'n_jobs': -1, 'random_state': 95} | 6 | 14 | 11 | 8 | 0 | 10 | 7 | 2 | 13 | 3  | 4  | 9  | 16 | 1 | 5 | 15 |
| 96 | RF,<br>PI  | {'criterion': 'gini', 'max_depth': 2, 'max_features': 2, 'min_samples_leaf': 5, 'n_estimators': 500, 'n_jobs': -1, 'random_state': 96} | 7 | 16 | 9  | 4 | 0 | 10 | 5 | 2 | 12 | 3  | 6  | 11 | 14 | 1 | 8 | 15 |
| 97 | RF,<br>PI  | {'criterion': 'gini', 'max_depth': 2, 'max_features': 2, 'min_samples_leaf': 5, 'n_estimators': 500, 'n_jobs': -1, 'random_state': 97} | 4 | 14 | 10 | 5 | 0 | 9  | 8 | 2 | 13 | 3  | 6  | 12 | 16 | 1 | 7 | 15 |
| 98 | RF,<br>PI  | {'criterion': 'gini', 'max_depth': 2, 'max_features': 2, 'min_samples_leaf': 5, 'n_estimators': 500, 'n_jobs': -1, 'random_state': 98} | 8 | 15 | 11 | 4 | 0 | 9  | 5 | 2 | 13 | 7  | 3  | 10 | 16 | 1 | 6 | 14 |
| 99 | RF,<br>PI  | {'criterion': 'gini', 'max_depth': 2, 'max_features': 2, 'min_samples_leaf': 5, 'n_estimators': 500, 'n_jobs': -1, 'random_state': 99} | 9 | 14 | 11 | 3 | 1 | 8  | 6 | 2 | 13 | 5  | 4  | 10 | 16 | 0 | 7 | 15 |
| 0  | XGB,<br>PI | {'colsample_bytree': 0.6, 'gamma': 0.5, 'max_depth': 2, 'min_child_weight': 5, 'random_state': 0, 'subsample': 0.6}                    | 1 | 13 | 10 | 2 | 0 | 5  | 3 | 4 | 12 | 9  | 8  | 11 | 15 | 7 | 6 | 16 |
| 1  | XGB,<br>PI | {'colsample_bytree': 0.6, 'gamma': 0.5, 'max_depth': 2, 'min_child_weight': 5, 'random_state': 1, 'subsample': 0.6}                    | 1 | 16 | 7  | 3 | 0 | 6  | 2 | 4 | 13 | 9  | 10 | 12 | 14 | 5 | 8 | 15 |
| 2  | XGB,<br>PI | {'colsample_bytree': 0.6, 'gamma': 0.5, 'max_depth': 2, 'min_child_weight': 5, 'random_state': 2, 'subsample': 0.6}                    | 1 | 15 | 11 | 2 | 0 | 3  | 4 | 6 | 12 | 7  | 10 | 9  | 14 | 8 | 5 | 16 |
| 3  | XGB,<br>PI | {'colsample_bytree': 0.6, 'gamma': 0.5, 'max_depth': 2, 'min_child_weight': 5, 'random_state': 3, 'subsample': 0.6}                    | 2 | 16 | 7  | 1 | 0 | 6  | 3 | 8 | 12 | 11 | 9  | 10 | 14 | 5 | 4 | 15 |
| 4  | XGB,<br>PI | {'colsample_bytree': 0.6, 'gamma': 0.5, 'max_depth': 2, 'min_child_weight': 5, 'random_state': 4, 'subsample': 0.6}                    | 0 | 13 | 10 | 1 | 3 | 2  | 4 | 5 | 14 | 8  | 12 | 6  | 16 | 9 | 7 | 15 |
| 5  | XGB,<br>PI | {'colsample_bytree': 0.6, 'gamma': 0.5, 'max_depth': 2, 'min_child_weight': 5, 'random_state': 5, 'subsample': 0.6}                    | 2 | 16 | 8  | 1 | 0 | 3  | 4 | 5 | 13 | 10 | 12 | 7  | 11 | 9 | 6 | 15 |
| 6  | XGB,<br>PI | {'colsample_bytree': 0.6, 'gamma': 0.5, 'max_depth': 2, 'min_child_weight': 5, 'random_state': 6, 'subsample': 0.6}                    | 5 | 12 | 10 | 4 | 0 | 2  | 1 | 3 | 16 | 8  | 9  | 11 | 13 | 7 | 6 | 14 |
| 7  | XGB,<br>PI | {'colsample_bytree': 0.6, 'gamma': 0.5, 'max_depth': 2, 'min_child_weight': 5, 'random_state': 7, 'subsample': 0.6}                    | 0 | 15 | 7  | 2 | 1 | 5  | 3 | 4 | 16 | 8  | 10 | 11 | 12 | 9 | 6 | 13 |

|    |            |                                                                                                                      |   |    |    |   |   |    |   |    |    |    |    |    |    |    |   |    |
|----|------------|----------------------------------------------------------------------------------------------------------------------|---|----|----|---|---|----|---|----|----|----|----|----|----|----|---|----|
| 8  | XGB,<br>PI | {'colsample_bytree': 0.6, 'gamma': 0.5, 'max_depth': 2, 'min_child_weight': 5, 'random_state': 8, 'subsample': 0.6}  | 1 | 15 | 9  | 2 | 0 | 4  | 3 | 8  | 12 | 11 | 10 | 7  | 13 | 6  | 5 | 16 |
| 9  | XGB,<br>PI | {'colsample_bytree': 0.6, 'gamma': 0.5, 'max_depth': 2, 'min_child_weight': 5, 'random_state': 9, 'subsample': 0.6}  | 1 | 13 | 6  | 2 | 0 | 3  | 4 | 8  | 10 | 9  | 11 | 15 | 12 | 5  | 7 | 16 |
| 10 | XGB,<br>PI | {'colsample_bytree': 0.6, 'gamma': 0.5, 'max_depth': 2, 'min_child_weight': 5, 'random_state': 10, 'subsample': 0.6} | 1 | 12 | 7  | 2 | 0 | 5  | 3 | 4  | 13 | 10 | 8  | 11 | 16 | 9  | 6 | 14 |
| 11 | XGB,<br>PI | {'colsample_bytree': 0.6, 'gamma': 0.5, 'max_depth': 2, 'min_child_weight': 5, 'random_state': 11, 'subsample': 0.6} | 1 | 15 | 5  | 3 | 0 | 6  | 8 | 4  | 12 | 10 | 9  | 13 | 14 | 7  | 2 | 16 |
| 12 | XGB,<br>PI | {'colsample_bytree': 0.6, 'gamma': 0.5, 'max_depth': 2, 'min_child_weight': 5, 'random_state': 12, 'subsample': 0.6} | 1 | 15 | 6  | 2 | 0 | 4  | 3 | 7  | 12 | 9  | 10 | 13 | 16 | 8  | 5 | 14 |
| 13 | XGB,<br>PI | {'colsample_bytree': 0.6, 'gamma': 0.5, 'max_depth': 2, 'min_child_weight': 5, 'random_state': 13, 'subsample': 0.6} | 1 | 14 | 12 | 2 | 0 | 8  | 3 | 7  | 16 | 6  | 10 | 9  | 13 | 5  | 4 | 15 |
| 14 | XGB,<br>PI | {'colsample_bytree': 0.6, 'gamma': 0.5, 'max_depth': 2, 'min_child_weight': 5, 'random_state': 14, 'subsample': 0.6} | 1 | 16 | 7  | 5 | 0 | 2  | 4 | 3  | 13 | 9  | 10 | 11 | 12 | 8  | 6 | 15 |
| 15 | XGB,<br>PI | {'colsample_bytree': 0.6, 'gamma': 0.5, 'max_depth': 2, 'min_child_weight': 5, 'random_state': 15, 'subsample': 0.6} | 1 | 12 | 11 | 0 | 2 | 7  | 5 | 4  | 14 | 8  | 9  | 10 | 15 | 6  | 3 | 16 |
| 16 | XGB,<br>PI | {'colsample_bytree': 0.6, 'gamma': 0.5, 'max_depth': 2, 'min_child_weight': 5, 'random_state': 16, 'subsample': 0.6} | 3 | 13 | 10 | 1 | 0 | 5  | 2 | 4  | 15 | 11 | 9  | 6  | 12 | 7  | 8 | 14 |
| 17 | XGB,<br>PI | {'colsample_bytree': 0.6, 'gamma': 0.5, 'max_depth': 2, 'min_child_weight': 5, 'random_state': 17, 'subsample': 0.6} | 1 | 12 | 8  | 4 | 0 | 2  | 5 | 6  | 15 | 7  | 9  | 10 | 13 | 11 | 3 | 16 |
| 18 | XGB,<br>PI | {'colsample_bytree': 0.6, 'gamma': 0.5, 'max_depth': 2, 'min_child_weight': 5, 'random_state': 18, 'subsample': 0.6} | 1 | 15 | 10 | 3 | 0 | 4  | 2 | 6  | 12 | 11 | 7  | 8  | 14 | 9  | 5 | 16 |
| 19 | XGB,<br>PI | {'colsample_bytree': 0.6, 'gamma': 0.5, 'max_depth': 2, 'min_child_weight': 5, 'random_state': 19, 'subsample': 0.6} | 2 | 11 | 7  | 0 | 1 | 5  | 4 | 6  | 15 | 9  | 12 | 10 | 14 | 8  | 3 | 16 |
| 20 | XGB,<br>PI | {'colsample_bytree': 0.6, 'gamma': 0.5, 'max_depth': 2, 'min_child_weight': 5, 'random_state': 20, 'subsample': 0.6} | 1 | 15 | 8  | 3 | 0 | 7  | 2 | 10 | 13 | 5  | 9  | 12 | 11 | 6  | 4 | 16 |
| 21 | XGB,<br>PI | {'colsample_bytree': 0.6, 'gamma': 0.5, 'max_depth': 2, 'min_child_weight': 5, 'random_state': 21, 'subsample': 0.6} | 1 | 15 | 8  | 3 | 0 | 10 | 2 | 7  | 12 | 4  | 9  | 11 | 16 | 5  | 6 | 14 |
| 22 | XGB,<br>PI | {'colsample_bytree': 0.6, 'gamma': 0.5, 'max_depth': 2, 'min_child_weight': 5, 'random_state': 22, 'subsample': 0.6} | 1 | 15 | 11 | 4 | 0 | 5  | 3 | 6  | 14 | 9  | 10 | 8  | 12 | 7  | 2 | 16 |

|    |            |                                                                                                                         |   |    |    |   |   |   |   |   |    |    |    |    |    |    |   |    |  |
|----|------------|-------------------------------------------------------------------------------------------------------------------------|---|----|----|---|---|---|---|---|----|----|----|----|----|----|---|----|--|
| 23 | XGB,<br>PI | {'colsample_bytree': 0.6, 'gamma': 0.5, 'max_depth': 2,<br>'min_child_weight': 5, 'random_state': 23, 'subsample': 0.6} | 1 | 14 | 8  | 4 | 0 | 5 | 3 | 7 | 15 | 10 | 9  | 11 | 12 | 2  | 6 | 16 |  |
| 24 | XGB,<br>PI | {'colsample_bytree': 0.6, 'gamma': 0.5, 'max_depth': 2,<br>'min_child_weight': 5, 'random_state': 24, 'subsample': 0.6} | 0 | 14 | 10 | 3 | 1 | 7 | 2 | 5 | 13 | 6  | 9  | 15 | 11 | 8  | 4 | 16 |  |
| 25 | XGB,<br>PI | {'colsample_bytree': 0.6, 'gamma': 0.5, 'max_depth': 2,<br>'min_child_weight': 5, 'random_state': 25, 'subsample': 0.6} | 3 | 14 | 10 | 1 | 0 | 4 | 2 | 7 | 12 | 8  | 9  | 11 | 16 | 6  | 5 | 15 |  |
| 26 | XGB,<br>PI | {'colsample_bytree': 0.6, 'gamma': 0.5, 'max_depth': 2,<br>'min_child_weight': 5, 'random_state': 26, 'subsample': 0.6} | 0 | 12 | 11 | 3 | 1 | 5 | 2 | 4 | 13 | 7  | 10 | 8  | 16 | 9  | 6 | 15 |  |
| 27 | XGB,<br>PI | {'colsample_bytree': 0.6, 'gamma': 0.5, 'max_depth': 2,<br>'min_child_weight': 5, 'random_state': 27, 'subsample': 0.6} | 0 | 15 | 11 | 2 | 1 | 5 | 4 | 8 | 12 | 10 | 9  | 7  | 13 | 3  | 6 | 16 |  |
| 28 | XGB,<br>PI | {'colsample_bytree': 0.6, 'gamma': 0.5, 'max_depth': 2,<br>'min_child_weight': 5, 'random_state': 28, 'subsample': 0.6} | 2 | 16 | 9  | 4 | 0 | 1 | 5 | 6 | 13 | 7  | 11 | 12 | 10 | 8  | 3 | 14 |  |
| 29 | XGB,<br>PI | {'colsample_bytree': 0.6, 'gamma': 0.5, 'max_depth': 2,<br>'min_child_weight': 5, 'random_state': 29, 'subsample': 0.6} | 2 | 16 | 10 | 3 | 0 | 5 | 1 | 9 | 12 | 8  | 11 | 4  | 13 | 6  | 7 | 15 |  |
| 30 | XGB,<br>PI | {'colsample_bytree': 0.6, 'gamma': 0.5, 'max_depth': 2,<br>'min_child_weight': 5, 'random_state': 30, 'subsample': 0.6} | 1 | 15 | 8  | 3 | 2 | 4 | 5 | 7 | 12 | 11 | 10 | 9  | 14 | 6  | 0 | 16 |  |
| 31 | XGB,<br>PI | {'colsample_bytree': 0.6, 'gamma': 0.5, 'max_depth': 2,<br>'min_child_weight': 5, 'random_state': 31, 'subsample': 0.6} | 0 | 14 | 6  | 3 | 1 | 2 | 4 | 5 | 12 | 8  | 10 | 11 | 13 | 9  | 7 | 16 |  |
| 32 | XGB,<br>PI | {'colsample_bytree': 0.6, 'gamma': 0.5, 'max_depth': 2,<br>'min_child_weight': 5, 'random_state': 32, 'subsample': 0.6} | 1 | 14 | 8  | 2 | 0 | 5 | 4 | 6 | 13 | 11 | 9  | 7  | 15 | 10 | 3 | 16 |  |
| 33 | XGB,<br>PI | {'colsample_bytree': 0.6, 'gamma': 0.5, 'max_depth': 2,<br>'min_child_weight': 5, 'random_state': 33, 'subsample': 0.6} | 1 | 15 | 9  | 2 | 0 | 3 | 5 | 4 | 14 | 8  | 10 | 11 | 13 | 7  | 6 | 16 |  |
| 34 | XGB,<br>PI | {'colsample_bytree': 0.6, 'gamma': 0.5, 'max_depth': 2,<br>'min_child_weight': 5, 'random_state': 34, 'subsample': 0.6} | 1 | 13 | 5  | 3 | 0 | 2 | 6 | 7 | 12 | 9  | 11 | 10 | 15 | 8  | 4 | 16 |  |
| 35 | XGB,<br>PI | {'colsample_bytree': 0.6, 'gamma': 0.5, 'max_depth': 2,<br>'min_child_weight': 5, 'random_state': 35, 'subsample': 0.6} | 2 | 15 | 11 | 1 | 0 | 7 | 3 | 4 | 13 | 6  | 10 | 9  | 12 | 8  | 5 | 16 |  |
| 36 | XGB,<br>PI | {'colsample_bytree': 0.6, 'gamma': 0.5, 'max_depth': 2,<br>'min_child_weight': 5, 'random_state': 36, 'subsample': 0.6} | 1 | 13 | 7  | 5 | 0 | 3 | 2 | 6 | 12 | 9  | 10 | 11 | 14 | 8  | 4 | 16 |  |
| 37 | XGB,<br>PI | {'colsample_bytree': 0.6, 'gamma': 0.5, 'max_depth': 2,<br>'min_child_weight': 5, 'random_state': 37, 'subsample': 0.6} | 1 | 14 | 10 | 2 | 0 | 3 | 6 | 5 | 12 | 9  | 8  | 11 | 16 | 7  | 4 | 15 |  |

|    |            |                                                                                                                         |   |    |    |   |   |   |   |   |    |    |    |    |    |    |   |    |  |
|----|------------|-------------------------------------------------------------------------------------------------------------------------|---|----|----|---|---|---|---|---|----|----|----|----|----|----|---|----|--|
| 38 | XGB,<br>PI | {'colsample_bytree': 0.6, 'gamma': 0.5, 'max_depth': 2,<br>'min_child_weight': 5, 'random_state': 38, 'subsample': 0.6} | 1 | 16 | 3  | 7 | 0 | 6 | 2 | 4 | 12 | 9  | 10 | 11 | 14 | 8  | 5 | 15 |  |
| 39 | XGB,<br>PI | {'colsample_bytree': 0.6, 'gamma': 0.5, 'max_depth': 2,<br>'min_child_weight': 5, 'random_state': 39, 'subsample': 0.6} | 2 | 15 | 9  | 3 | 0 | 8 | 7 | 1 | 12 | 6  | 11 | 10 | 13 | 4  | 5 | 16 |  |
| 40 | XGB,<br>PI | {'colsample_bytree': 0.6, 'gamma': 0.5, 'max_depth': 2,<br>'min_child_weight': 5, 'random_state': 40, 'subsample': 0.6} | 5 | 14 | 8  | 2 | 0 | 3 | 4 | 6 | 13 | 10 | 9  | 11 | 12 | 7  | 1 | 16 |  |
| 41 | XGB,<br>PI | {'colsample_bytree': 0.6, 'gamma': 0.5, 'max_depth': 2,<br>'min_child_weight': 5, 'random_state': 41, 'subsample': 0.6} | 1 | 15 | 11 | 2 | 0 | 5 | 6 | 3 | 13 | 9  | 10 | 8  | 14 | 7  | 4 | 16 |  |
| 42 | XGB,<br>PI | {'colsample_bytree': 0.6, 'gamma': 0.5, 'max_depth': 2,<br>'min_child_weight': 5, 'random_state': 42, 'subsample': 0.6} | 3 | 16 | 8  | 1 | 0 | 6 | 4 | 7 | 11 | 10 | 9  | 14 | 13 | 5  | 2 | 15 |  |
| 43 | XGB,<br>PI | {'colsample_bytree': 0.6, 'gamma': 0.5, 'max_depth': 2,<br>'min_child_weight': 5, 'random_state': 43, 'subsample': 0.6} | 1 | 14 | 8  | 2 | 0 | 4 | 3 | 5 | 13 | 9  | 11 | 10 | 16 | 6  | 7 | 12 |  |
| 44 | XGB,<br>PI | {'colsample_bytree': 0.6, 'gamma': 0.5, 'max_depth': 2,<br>'min_child_weight': 5, 'random_state': 44, 'subsample': 0.6} | 1 | 15 | 9  | 3 | 0 | 5 | 2 | 4 | 14 | 7  | 10 | 11 | 12 | 6  | 8 | 16 |  |
| 45 | XGB,<br>PI | {'colsample_bytree': 0.6, 'gamma': 0.5, 'max_depth': 2,<br>'min_child_weight': 5, 'random_state': 45, 'subsample': 0.6} | 2 | 15 | 9  | 1 | 0 | 3 | 5 | 7 | 14 | 8  | 10 | 13 | 11 | 6  | 4 | 16 |  |
| 46 | XGB,<br>PI | {'colsample_bytree': 0.6, 'gamma': 0.5, 'max_depth': 2,<br>'min_child_weight': 5, 'random_state': 46, 'subsample': 0.6} | 0 | 14 | 9  | 3 | 1 | 5 | 2 | 4 | 13 | 6  | 11 | 10 | 12 | 7  | 8 | 16 |  |
| 47 | XGB,<br>PI | {'colsample_bytree': 0.6, 'gamma': 0.5, 'max_depth': 2,<br>'min_child_weight': 5, 'random_state': 47, 'subsample': 0.6} | 2 | 14 | 10 | 4 | 0 | 1 | 3 | 6 | 12 | 7  | 11 | 9  | 16 | 8  | 5 | 15 |  |
| 48 | XGB,<br>PI | {'colsample_bytree': 0.6, 'gamma': 0.5, 'max_depth': 2,<br>'min_child_weight': 5, 'random_state': 48, 'subsample': 0.6} | 0 | 14 | 9  | 3 | 1 | 5 | 7 | 4 | 16 | 10 | 12 | 2  | 11 | 8  | 6 | 15 |  |
| 49 | XGB,<br>PI | {'colsample_bytree': 0.6, 'gamma': 0.5, 'max_depth': 2,<br>'min_child_weight': 5, 'random_state': 49, 'subsample': 0.6} | 0 | 14 | 6  | 3 | 1 | 7 | 2 | 5 | 13 | 9  | 10 | 11 | 15 | 8  | 4 | 16 |  |
| 50 | XGB,<br>PI | {'colsample_bytree': 0.6, 'gamma': 0.5, 'max_depth': 2,<br>'min_child_weight': 5, 'random_state': 50, 'subsample': 0.6} | 0 | 16 | 11 | 3 | 1 | 2 | 6 | 4 | 13 | 7  | 8  | 10 | 12 | 9  | 5 | 15 |  |
| 51 | XGB,<br>PI | {'colsample_bytree': 0.6, 'gamma': 0.5, 'max_depth': 2,<br>'min_child_weight': 5, 'random_state': 51, 'subsample': 0.6} | 1 | 15 | 7  | 3 | 0 | 2 | 5 | 6 | 12 | 9  | 8  | 11 | 13 | 10 | 4 | 16 |  |
| 52 | XGB,<br>PI | {'colsample_bytree': 0.6, 'gamma': 0.5, 'max_depth': 2,<br>'min_child_weight': 5, 'random_state': 52, 'subsample': 0.6} | 1 | 13 | 9  | 3 | 0 | 2 | 4 | 6 | 14 | 8  | 12 | 10 | 11 | 7  | 5 | 16 |  |

|    |            |                                                                                                                         |   |    |    |   |   |   |   |   |    |    |    |    |    |    |   |    |
|----|------------|-------------------------------------------------------------------------------------------------------------------------|---|----|----|---|---|---|---|---|----|----|----|----|----|----|---|----|
| 53 | XGB,<br>PI | {'colsample_bytree': 0.6, 'gamma': 0.5, 'max_depth': 2,<br>'min_child_weight': 5, 'random_state': 53, 'subsample': 0.6} | 1 | 15 | 7  | 2 | 0 | 3 | 6 | 5 | 14 | 9  | 10 | 11 | 12 | 8  | 4 | 16 |
| 54 | XGB,<br>PI | {'colsample_bytree': 0.6, 'gamma': 0.5, 'max_depth': 2,<br>'min_child_weight': 5, 'random_state': 54, 'subsample': 0.6} | 2 | 14 | 10 | 1 | 0 | 8 | 4 | 5 | 12 | 3  | 9  | 11 | 16 | 7  | 6 | 15 |
| 55 | XGB,<br>PI | {'colsample_bytree': 0.6, 'gamma': 0.5, 'max_depth': 2,<br>'min_child_weight': 5, 'random_state': 55, 'subsample': 0.6} | 2 | 14 | 11 | 1 | 0 | 3 | 4 | 6 | 12 | 8  | 10 | 9  | 16 | 7  | 5 | 15 |
| 56 | XGB,<br>PI | {'colsample_bytree': 0.6, 'gamma': 0.5, 'max_depth': 2,<br>'min_child_weight': 5, 'random_state': 56, 'subsample': 0.6} | 1 | 14 | 8  | 2 | 0 | 4 | 3 | 5 | 15 | 9  | 10 | 12 | 13 | 6  | 7 | 16 |
| 57 | XGB,<br>PI | {'colsample_bytree': 0.6, 'gamma': 0.5, 'max_depth': 2,<br>'min_child_weight': 5, 'random_state': 57, 'subsample': 0.6} | 1 | 12 | 10 | 3 | 0 | 4 | 2 | 6 | 11 | 7  | 9  | 13 | 15 | 8  | 5 | 16 |
| 58 | XGB,<br>PI | {'colsample_bytree': 0.6, 'gamma': 0.5, 'max_depth': 2,<br>'min_child_weight': 5, 'random_state': 58, 'subsample': 0.6} | 1 | 14 | 9  | 3 | 0 | 5 | 4 | 6 | 13 | 7  | 8  | 10 | 12 | 11 | 2 | 16 |
| 59 | XGB,<br>PI | {'colsample_bytree': 0.6, 'gamma': 0.5, 'max_depth': 2,<br>'min_child_weight': 5, 'random_state': 59, 'subsample': 0.6} | 2 | 16 | 9  | 1 | 0 | 5 | 3 | 4 | 12 | 10 | 8  | 11 | 15 | 7  | 6 | 14 |
| 60 | XGB,<br>PI | {'colsample_bytree': 0.6, 'gamma': 0.5, 'max_depth': 2,<br>'min_child_weight': 5, 'random_state': 60, 'subsample': 0.6} | 1 | 15 | 8  | 2 | 0 | 6 | 3 | 4 | 12 | 9  | 11 | 10 | 13 | 7  | 5 | 16 |
| 61 | XGB,<br>PI | {'colsample_bytree': 0.6, 'gamma': 0.5, 'max_depth': 2,<br>'min_child_weight': 5, 'random_state': 61, 'subsample': 0.6} | 2 | 12 | 8  | 1 | 0 | 4 | 3 | 6 | 15 | 7  | 10 | 11 | 13 | 9  | 5 | 16 |
| 62 | XGB,<br>PI | {'colsample_bytree': 0.6, 'gamma': 0.5, 'max_depth': 2,<br>'min_child_weight': 5, 'random_state': 62, 'subsample': 0.6} | 1 | 15 | 2  | 4 | 0 | 3 | 5 | 8 | 13 | 11 | 9  | 10 | 16 | 7  | 6 | 14 |
| 63 | XGB,<br>PI | {'colsample_bytree': 0.6, 'gamma': 0.5, 'max_depth': 2,<br>'min_child_weight': 5, 'random_state': 63, 'subsample': 0.6} | 1 | 16 | 6  | 4 | 0 | 2 | 3 | 8 | 13 | 11 | 9  | 10 | 14 | 7  | 5 | 15 |
| 64 | XGB,<br>PI | {'colsample_bytree': 0.6, 'gamma': 0.5, 'max_depth': 2,<br>'min_child_weight': 5, 'random_state': 64, 'subsample': 0.6} | 1 | 13 | 7  | 2 | 0 | 4 | 3 | 6 | 15 | 10 | 11 | 8  | 14 | 9  | 5 | 16 |
| 65 | XGB,<br>PI | {'colsample_bytree': 0.6, 'gamma': 0.5, 'max_depth': 2,<br>'min_child_weight': 5, 'random_state': 65, 'subsample': 0.6} | 0 | 11 | 8  | 2 | 1 | 5 | 3 | 9 | 12 | 6  | 10 | 14 | 16 | 7  | 4 | 15 |
| 66 | XGB,<br>PI | {'colsample_bytree': 0.6, 'gamma': 0.5, 'max_depth': 2,<br>'min_child_weight': 5, 'random_state': 66, 'subsample': 0.6} | 4 | 13 | 8  | 3 | 0 | 2 | 1 | 6 | 12 | 7  | 10 | 11 | 16 | 9  | 5 | 14 |
| 67 | XGB,<br>PI | {'colsample_bytree': 0.6, 'gamma': 0.5, 'max_depth': 2,<br>'min_child_weight': 5, 'random_state': 67, 'subsample': 0.6} | 0 | 13 | 9  | 5 | 1 | 4 | 3 | 6 | 11 | 8  | 7  | 12 | 15 | 10 | 2 | 16 |

|    |            |                                                                                                                         |   |    |    |   |   |   |   |   |    |    |    |    |    |    |   |    |  |
|----|------------|-------------------------------------------------------------------------------------------------------------------------|---|----|----|---|---|---|---|---|----|----|----|----|----|----|---|----|--|
| 68 | XGB,<br>PI | {'colsample_bytree': 0.6, 'gamma': 0.5, 'max_depth': 2,<br>'min_child_weight': 5, 'random_state': 68, 'subsample': 0.6} | 2 | 16 | 6  | 1 | 0 | 5 | 3 | 4 | 14 | 11 | 7  | 9  | 12 | 10 | 8 | 15 |  |
| 69 | XGB,<br>PI | {'colsample_bytree': 0.6, 'gamma': 0.5, 'max_depth': 2,<br>'min_child_weight': 5, 'random_state': 69, 'subsample': 0.6} | 1 | 14 | 7  | 2 | 0 | 4 | 6 | 3 | 15 | 9  | 10 | 13 | 12 | 8  | 5 | 16 |  |
| 70 | XGB,<br>PI | {'colsample_bytree': 0.6, 'gamma': 0.5, 'max_depth': 2,<br>'min_child_weight': 5, 'random_state': 70, 'subsample': 0.6} | 1 | 12 | 5  | 2 | 0 | 6 | 4 | 3 | 15 | 9  | 10 | 11 | 14 | 8  | 7 | 16 |  |
| 71 | XGB,<br>PI | {'colsample_bytree': 0.6, 'gamma': 0.5, 'max_depth': 2,<br>'min_child_weight': 5, 'random_state': 71, 'subsample': 0.6} | 0 | 13 | 4  | 2 | 1 | 6 | 5 | 7 | 14 | 9  | 11 | 10 | 12 | 8  | 3 | 16 |  |
| 72 | XGB,<br>PI | {'colsample_bytree': 0.6, 'gamma': 0.5, 'max_depth': 2,<br>'min_child_weight': 5, 'random_state': 72, 'subsample': 0.6} | 1 | 15 | 7  | 3 | 0 | 4 | 2 | 5 | 11 | 10 | 6  | 12 | 13 | 8  | 9 | 16 |  |
| 73 | XGB,<br>PI | {'colsample_bytree': 0.6, 'gamma': 0.5, 'max_depth': 2,<br>'min_child_weight': 5, 'random_state': 73, 'subsample': 0.6} | 3 | 15 | 9  | 1 | 0 | 2 | 5 | 6 | 12 | 11 | 7  | 8  | 13 | 10 | 4 | 16 |  |
| 74 | XGB,<br>PI | {'colsample_bytree': 0.6, 'gamma': 0.5, 'max_depth': 2,<br>'min_child_weight': 5, 'random_state': 74, 'subsample': 0.6} | 1 | 14 | 7  | 4 | 0 | 6 | 2 | 5 | 12 | 10 | 9  | 11 | 15 | 8  | 3 | 16 |  |
| 75 | XGB,<br>PI | {'colsample_bytree': 0.6, 'gamma': 0.5, 'max_depth': 2,<br>'min_child_weight': 5, 'random_state': 75, 'subsample': 0.6} | 1 | 14 | 7  | 2 | 0 | 4 | 5 | 9 | 13 | 3  | 10 | 11 | 15 | 8  | 6 | 16 |  |
| 76 | XGB,<br>PI | {'colsample_bytree': 0.6, 'gamma': 0.5, 'max_depth': 2,<br>'min_child_weight': 5, 'random_state': 76, 'subsample': 0.6} | 1 | 13 | 8  | 4 | 0 | 2 | 3 | 5 | 12 | 6  | 10 | 11 | 16 | 9  | 7 | 15 |  |
| 77 | XGB,<br>PI | {'colsample_bytree': 0.6, 'gamma': 0.5, 'max_depth': 2,<br>'min_child_weight': 5, 'random_state': 77, 'subsample': 0.6} | 1 | 16 | 9  | 3 | 0 | 2 | 6 | 4 | 12 | 7  | 8  | 11 | 14 | 10 | 5 | 15 |  |
| 78 | XGB,<br>PI | {'colsample_bytree': 0.6, 'gamma': 0.5, 'max_depth': 2,<br>'min_child_weight': 5, 'random_state': 78, 'subsample': 0.6} | 2 | 13 | 9  | 1 | 0 | 5 | 3 | 6 | 12 | 8  | 11 | 10 | 15 | 7  | 4 | 16 |  |
| 79 | XGB,<br>PI | {'colsample_bytree': 0.6, 'gamma': 0.5, 'max_depth': 2,<br>'min_child_weight': 5, 'random_state': 79, 'subsample': 0.6} | 1 | 16 | 9  | 4 | 0 | 6 | 2 | 7 | 13 | 8  | 10 | 11 | 14 | 3  | 5 | 15 |  |
| 80 | XGB,<br>PI | {'colsample_bytree': 0.6, 'gamma': 0.5, 'max_depth': 2,<br>'min_child_weight': 5, 'random_state': 80, 'subsample': 0.6} | 4 | 13 | 10 | 1 | 0 | 5 | 2 | 3 | 12 | 8  | 11 | 7  | 15 | 6  | 9 | 14 |  |
| 81 | XGB,<br>PI | {'colsample_bytree': 0.6, 'gamma': 0.5, 'max_depth': 2,<br>'min_child_weight': 5, 'random_state': 81, 'subsample': 0.6} | 1 | 14 | 10 | 6 | 0 | 2 | 5 | 4 | 11 | 8  | 13 | 7  | 15 | 9  | 3 | 16 |  |
| 82 | XGB,<br>PI | {'colsample_bytree': 0.6, 'gamma': 0.5, 'max_depth': 2,<br>'min_child_weight': 5, 'random_state': 82, 'subsample': 0.6} | 2 | 15 | 9  | 3 | 0 | 4 | 1 | 7 | 13 | 11 | 10 | 6  | 14 | 5  | 8 | 16 |  |

|    |            |                                                                                                                         |   |    |    |   |   |   |   |   |    |    |    |    |    |    |   |    |
|----|------------|-------------------------------------------------------------------------------------------------------------------------|---|----|----|---|---|---|---|---|----|----|----|----|----|----|---|----|
| 83 | XGB,<br>PI | {'colsample_bytree': 0.6, 'gamma': 0.5, 'max_depth': 2,<br>'min_child_weight': 5, 'random_state': 83, 'subsample': 0.6} | 4 | 14 | 9  | 1 | 0 | 3 | 2 | 8 | 13 | 12 | 7  | 6  | 10 | 11 | 5 | 16 |
| 84 | XGB,<br>PI | {'colsample_bytree': 0.6, 'gamma': 0.5, 'max_depth': 2,<br>'min_child_weight': 5, 'random_state': 84, 'subsample': 0.6} | 1 | 13 | 10 | 4 | 0 | 3 | 6 | 2 | 12 | 8  | 11 | 9  | 15 | 7  | 5 | 16 |
| 85 | XGB,<br>PI | {'colsample_bytree': 0.6, 'gamma': 0.5, 'max_depth': 2,<br>'min_child_weight': 5, 'random_state': 85, 'subsample': 0.6} | 2 | 14 | 9  | 3 | 0 | 1 | 4 | 5 | 13 | 8  | 10 | 11 | 15 | 7  | 6 | 16 |
| 86 | XGB,<br>PI | {'colsample_bytree': 0.6, 'gamma': 0.5, 'max_depth': 2,<br>'min_child_weight': 5, 'random_state': 86, 'subsample': 0.6} | 2 | 14 | 7  | 1 | 0 | 5 | 4 | 3 | 11 | 9  | 10 | 12 | 15 | 8  | 6 | 16 |
| 87 | XGB,<br>PI | {'colsample_bytree': 0.6, 'gamma': 0.5, 'max_depth': 2,<br>'min_child_weight': 5, 'random_state': 87, 'subsample': 0.6} | 1 | 15 | 8  | 4 | 0 | 7 | 2 | 5 | 13 | 9  | 10 | 11 | 16 | 6  | 3 | 14 |
| 88 | XGB,<br>PI | {'colsample_bytree': 0.6, 'gamma': 0.5, 'max_depth': 2,<br>'min_child_weight': 5, 'random_state': 88, 'subsample': 0.6} | 1 | 16 | 11 | 2 | 0 | 3 | 4 | 5 | 12 | 9  | 7  | 10 | 14 | 6  | 8 | 15 |
| 89 | XGB,<br>PI | {'colsample_bytree': 0.6, 'gamma': 0.5, 'max_depth': 2,<br>'min_child_weight': 5, 'random_state': 89, 'subsample': 0.6} | 1 | 14 | 11 | 2 | 0 | 4 | 3 | 5 | 13 | 7  | 8  | 9  | 12 | 10 | 6 | 16 |
| 90 | XGB,<br>PI | {'colsample_bytree': 0.6, 'gamma': 0.5, 'max_depth': 2,<br>'min_child_weight': 5, 'random_state': 90, 'subsample': 0.6} | 1 | 14 | 7  | 2 | 0 | 6 | 4 | 5 | 11 | 8  | 10 | 13 | 15 | 9  | 3 | 16 |
| 91 | XGB,<br>PI | {'colsample_bytree': 0.6, 'gamma': 0.5, 'max_depth': 2,<br>'min_child_weight': 5, 'random_state': 91, 'subsample': 0.6} | 0 | 16 | 9  | 3 | 1 | 2 | 4 | 7 | 14 | 8  | 12 | 11 | 13 | 6  | 5 | 15 |
| 92 | XGB,<br>PI | {'colsample_bytree': 0.6, 'gamma': 0.5, 'max_depth': 2,<br>'min_child_weight': 5, 'random_state': 92, 'subsample': 0.6} | 1 | 16 | 12 | 2 | 0 | 7 | 3 | 4 | 14 | 6  | 9  | 10 | 11 | 8  | 5 | 15 |
| 93 | XGB,<br>PI | {'colsample_bytree': 0.6, 'gamma': 0.5, 'max_depth': 2,<br>'min_child_weight': 5, 'random_state': 93, 'subsample': 0.6} | 1 | 13 | 7  | 2 | 0 | 3 | 5 | 4 | 14 | 9  | 10 | 11 | 12 | 8  | 6 | 16 |
| 94 | XGB,<br>PI | {'colsample_bytree': 0.6, 'gamma': 0.5, 'max_depth': 2,<br>'min_child_weight': 5, 'random_state': 94, 'subsample': 0.6} | 1 | 13 | 9  | 2 | 0 | 4 | 3 | 7 | 12 | 10 | 6  | 11 | 14 | 5  | 8 | 16 |
| 95 | XGB,<br>PI | {'colsample_bytree': 0.6, 'gamma': 0.5, 'max_depth': 2,<br>'min_child_weight': 5, 'random_state': 95, 'subsample': 0.6} | 1 | 11 | 9  | 6 | 0 | 2 | 5 | 4 | 10 | 7  | 12 | 16 | 15 | 8  | 3 | 14 |
| 96 | XGB,<br>PI | {'colsample_bytree': 0.6, 'gamma': 0.5, 'max_depth': 2,<br>'min_child_weight': 5, 'random_state': 96, 'subsample': 0.6} | 4 | 13 | 7  | 1 | 0 | 3 | 5 | 9 | 11 | 12 | 10 | 8  | 14 | 6  | 2 | 16 |
| 97 | XGB,<br>PI | {'colsample_bytree': 0.6, 'gamma': 0.5, 'max_depth': 2,<br>'min_child_weight': 5, 'random_state': 97, 'subsample': 0.6} | 2 | 15 | 7  | 1 | 0 | 6 | 5 | 3 | 13 | 8  | 9  | 14 | 11 | 10 | 4 | 16 |

|    |             |                                                                                                                         |    |    |    |    |   |    |    |    |    |    |    |    |    |    |    |    |  |
|----|-------------|-------------------------------------------------------------------------------------------------------------------------|----|----|----|----|---|----|----|----|----|----|----|----|----|----|----|----|--|
| 98 | XGB,<br>PI  | {'colsample_bytree': 0.6, 'gamma': 0.5, 'max_depth': 2,<br>'min_child_weight': 5, 'random_state': 98, 'subsample': 0.6} | 2  | 15 | 9  | 1  | 0 | 4  | 6  | 5  | 13 | 8  | 11 | 10 | 16 | 7  | 3  | 14 |  |
| 99 | XGB,<br>PI  | {'colsample_bytree': 0.6, 'gamma': 0.5, 'max_depth': 2,<br>'min_child_weight': 5, 'random_state': 99, 'subsample': 0.6} | 1  | 12 | 4  | 2  | 0 | 7  | 5  | 3  | 15 | 10 | 9  | 11 | 14 | 8  | 6  | 16 |  |
| 0  | XGB,<br>RFE | {'colsample_bytree': 0.6, 'gamma': 0.5, 'max_depth': 2,<br>'min_child_weight': 5, 'random_state': 0, 'subsample': 0.6}  | 8  | 16 | 9  | 7  | 6 | 4  | 2  | 3  | 14 | 12 | 5  | 10 | 13 | 1  | 11 | 15 |  |
| 1  | XGB,<br>RFE | {'colsample_bytree': 0.6, 'gamma': 0.5, 'max_depth': 2,<br>'min_child_weight': 5, 'random_state': 1, 'subsample': 0.6}  | 11 | 14 | 7  | 2  | 6 | 12 | 3  | 9  | 5  | 13 | 1  | 15 | 8  | 4  | 10 | 17 |  |
| 2  | XGB,<br>RFE | {'colsample_bytree': 0.6, 'gamma': 0.5, 'max_depth': 2,<br>'min_child_weight': 5, 'random_state': 2, 'subsample': 0.6}  | 7  | 14 | 13 | 8  | 1 | 10 | 4  | 3  | 12 | 11 | 6  | 5  | 15 | 2  | 9  | 17 |  |
| 3  | XGB,<br>RFE | {'colsample_bytree': 0.6, 'gamma': 0.5, 'max_depth': 2,<br>'min_child_weight': 5, 'random_state': 3, 'subsample': 0.6}  | 10 | 7  | 13 | 8  | 5 | 14 | 1  | 2  | 17 | 6  | 3  | 12 | 9  | 4  | 11 | 15 |  |
| 4  | XGB,<br>RFE | {'colsample_bytree': 0.6, 'gamma': 0.5, 'max_depth': 2,<br>'min_child_weight': 5, 'random_state': 4, 'subsample': 0.6}  | 8  | 13 | 16 | 1  | 3 | 4  | 6  | 2  | 15 | 9  | 11 | 14 | 5  | 7  | 10 | 17 |  |
| 5  | XGB,<br>RFE | {'colsample_bytree': 0.6, 'gamma': 0.5, 'max_depth': 2,<br>'min_child_weight': 5, 'random_state': 5, 'subsample': 0.6}  | 2  | 16 | 6  | 1  | 9 | 4  | 8  | 7  | 13 | 15 | 14 | 12 | 10 | 3  | 5  | 17 |  |
| 6  | XGB,<br>RFE | {'colsample_bytree': 0.6, 'gamma': 0.5, 'max_depth': 2,<br>'min_child_weight': 5, 'random_state': 6, 'subsample': 0.6}  | 7  | 12 | 11 | 2  | 1 | 4  | 10 | 6  | 15 | 13 | 8  | 14 | 9  | 3  | 5  | 16 |  |
| 7  | XGB,<br>RFE | {'colsample_bytree': 0.6, 'gamma': 0.5, 'max_depth': 2,<br>'min_child_weight': 5, 'random_state': 7, 'subsample': 0.6}  | 9  | 14 | 4  | 12 | 1 | 6  | 10 | 2  | 13 | 5  | 7  | 8  | 15 | 3  | 17 | 16 |  |
| 8  | XGB,<br>RFE | {'colsample_bytree': 0.6, 'gamma': 0.5, 'max_depth': 2,<br>'min_child_weight': 5, 'random_state': 8, 'subsample': 0.6}  | 2  | 13 | 6  | 9  | 5 | 7  | 1  | 8  | 12 | 11 | 4  | 16 | 14 | 3  | 10 | 17 |  |
| 9  | XGB,<br>RFE | {'colsample_bytree': 0.6, 'gamma': 0.5, 'max_depth': 2,<br>'min_child_weight': 5, 'random_state': 9, 'subsample': 0.6}  | 7  | 14 | 12 | 2  | 1 | 15 | 8  | 3  | 10 | 4  | 5  | 11 | 9  | 6  | 13 | 17 |  |
| 10 | XGB,<br>RFE | {'colsample_bytree': 0.6, 'gamma': 0.5, 'max_depth': 2,<br>'min_child_weight': 5, 'random_state': 10, 'subsample': 0.6} | 5  | 11 | 10 | 15 | 4 | 12 | 7  | 3  | 13 | 6  | 14 | 9  | 17 | 2  | 1  | 16 |  |
| 11 | XGB,<br>RFE | {'colsample_bytree': 0.6, 'gamma': 0.5, 'max_depth': 2,<br>'min_child_weight': 5, 'random_state': 11, 'subsample': 0.6} | 1  | 14 | 6  | 8  | 3 | 12 | 11 | 9  | 17 | 7  | 5  | 4  | 13 | 10 | 2  | 16 |  |
| 12 | XGB,<br>RFE | {'colsample_bytree': 0.6, 'gamma': 0.5, 'max_depth': 2,<br>'min_child_weight': 5, 'random_state': 12, 'subsample': 0.6} | 7  | 17 | 12 | 4  | 1 | 15 | 3  | 14 | 13 | 8  | 5  | 11 | 10 | 2  | 6  | 16 |  |



|    |             |                                                                                                                         |    |    |    |    |   |    |    |    |    |    |    |    |    |   |    |    |  |
|----|-------------|-------------------------------------------------------------------------------------------------------------------------|----|----|----|----|---|----|----|----|----|----|----|----|----|---|----|----|--|
| 13 | XGB,<br>RFE | {'colsample_bytree': 0.6, 'gamma': 0.5, 'max_depth': 2,<br>'min_child_weight': 5, 'random_state': 13, 'subsample': 0.6} | 1  | 16 | 13 | 5  | 9 | 7  | 3  | 4  | 11 | 8  | 6  | 10 | 17 | 2 | 12 | 15 |  |
| 14 | XGB,<br>RFE | {'colsample_bytree': 0.6, 'gamma': 0.5, 'max_depth': 2,<br>'min_child_weight': 5, 'random_state': 14, 'subsample': 0.6} | 3  | 14 | 9  | 4  | 1 | 8  | 10 | 16 | 15 | 13 | 2  | 6  | 11 | 5 | 7  | 17 |  |
| 15 | XGB,<br>RFE | {'colsample_bytree': 0.6, 'gamma': 0.5, 'max_depth': 2,<br>'min_child_weight': 5, 'random_state': 15, 'subsample': 0.6} | 1  | 8  | 11 | 2  | 4 | 10 | 7  | 3  | 15 | 12 | 9  | 14 | 16 | 5 | 6  | 17 |  |
| 16 | XGB,<br>RFE | {'colsample_bytree': 0.6, 'gamma': 0.5, 'max_depth': 2,<br>'min_child_weight': 5, 'random_state': 16, 'subsample': 0.6} | 15 | 17 | 11 | 2  | 1 | 6  | 10 | 9  | 12 | 13 | 7  | 16 | 8  | 3 | 5  | 14 |  |
| 17 | XGB,<br>RFE | {'colsample_bytree': 0.6, 'gamma': 0.5, 'max_depth': 2,<br>'min_child_weight': 5, 'random_state': 17, 'subsample': 0.6} | 2  | 11 | 13 | 3  | 9 | 12 | 4  | 8  | 16 | 7  | 14 | 6  | 10 | 1 | 5  | 17 |  |
| 18 | XGB,<br>RFE | {'colsample_bytree': 0.6, 'gamma': 0.5, 'max_depth': 2,<br>'min_child_weight': 5, 'random_state': 18, 'subsample': 0.6} | 9  | 17 | 15 | 1  | 4 | 11 | 5  | 8  | 12 | 6  | 7  | 3  | 13 | 2 | 10 | 16 |  |
| 19 | XGB,<br>RFE | {'colsample_bytree': 0.6, 'gamma': 0.5, 'max_depth': 2,<br>'min_child_weight': 5, 'random_state': 19, 'subsample': 0.6} | 5  | 15 | 12 | 4  | 1 | 10 | 8  | 7  | 16 | 13 | 6  | 2  | 11 | 3 | 9  | 17 |  |
| 20 | XGB,<br>RFE | {'colsample_bytree': 0.6, 'gamma': 0.5, 'max_depth': 2,<br>'min_child_weight': 5, 'random_state': 20, 'subsample': 0.6} | 1  | 15 | 5  | 9  | 2 | 7  | 14 | 8  | 11 | 6  | 12 | 4  | 13 | 3 | 10 | 17 |  |
| 21 | XGB,<br>RFE | {'colsample_bytree': 0.6, 'gamma': 0.5, 'max_depth': 2,<br>'min_child_weight': 5, 'random_state': 21, 'subsample': 0.6} | 5  | 17 | 6  | 4  | 3 | 10 | 13 | 7  | 12 | 8  | 11 | 2  | 16 | 1 | 9  | 15 |  |
| 22 | XGB,<br>RFE | {'colsample_bytree': 0.6, 'gamma': 0.5, 'max_depth': 2,<br>'min_child_weight': 5, 'random_state': 22, 'subsample': 0.6} | 10 | 12 | 15 | 5  | 2 | 9  | 1  | 7  | 13 | 11 | 6  | 4  | 14 | 3 | 8  | 17 |  |
| 23 | XGB,<br>RFE | {'colsample_bytree': 0.6, 'gamma': 0.5, 'max_depth': 2,<br>'min_child_weight': 5, 'random_state': 23, 'subsample': 0.6} | 1  | 15 | 12 | 6  | 2 | 7  | 5  | 4  | 16 | 9  | 11 | 10 | 14 | 3 | 13 | 17 |  |
| 24 | XGB,<br>RFE | {'colsample_bytree': 0.6, 'gamma': 0.5, 'max_depth': 2,<br>'min_child_weight': 5, 'random_state': 24, 'subsample': 0.6} | 1  | 14 | 12 | 2  | 4 | 8  | 7  | 5  | 10 | 6  | 13 | 15 | 11 | 3 | 9  | 17 |  |
| 25 | XGB,<br>RFE | {'colsample_bytree': 0.6, 'gamma': 0.5, 'max_depth': 2,<br>'min_child_weight': 5, 'random_state': 25, 'subsample': 0.6} | 6  | 15 | 5  | 2  | 1 | 13 | 12 | 9  | 16 | 4  | 11 | 10 | 17 | 3 | 7  | 14 |  |
| 26 | XGB,<br>RFE | {'colsample_bytree': 0.6, 'gamma': 0.5, 'max_depth': 2,<br>'min_child_weight': 5, 'random_state': 26, 'subsample': 0.6} | 1  | 16 | 11 | 8  | 7 | 9  | 2  | 6  | 14 | 4  | 10 | 5  | 17 | 3 | 13 | 15 |  |
| 27 | XGB,<br>RFE | {'colsample_bytree': 0.6, 'gamma': 0.5, 'max_depth': 2,<br>'min_child_weight': 5, 'random_state': 27, 'subsample': 0.6} | 1  | 16 | 15 | 11 | 5 | 4  | 10 | 2  | 12 | 9  | 6  | 8  | 14 | 3 | 7  | 17 |  |

|    |             |                                                                                                                         |    |    |    |    |    |    |    |    |    |    |    |    |    |   |    |    |  |
|----|-------------|-------------------------------------------------------------------------------------------------------------------------|----|----|----|----|----|----|----|----|----|----|----|----|----|---|----|----|--|
| 28 | XGB,<br>RFE | {'colsample_bytree': 0.6, 'gamma': 0.5, 'max_depth': 2,<br>'min_child_weight': 5, 'random_state': 28, 'subsample': 0.6} | 1  | 16 | 5  | 10 | 2  | 12 | 9  | 6  | 13 | 3  | 8  | 7  | 15 | 4 | 11 | 17 |  |
| 29 | XGB,<br>RFE | {'colsample_bytree': 0.6, 'gamma': 0.5, 'max_depth': 2,<br>'min_child_weight': 5, 'random_state': 29, 'subsample': 0.6} | 10 | 12 | 9  | 8  | 2  | 3  | 5  | 11 | 13 | 7  | 4  | 15 | 17 | 1 | 6  | 16 |  |
| 30 | XGB,<br>RFE | {'colsample_bytree': 0.6, 'gamma': 0.5, 'max_depth': 2,<br>'min_child_weight': 5, 'random_state': 30, 'subsample': 0.6} | 9  | 14 | 13 | 6  | 2  | 3  | 1  | 7  | 15 | 5  | 12 | 10 | 11 | 4 | 8  | 17 |  |
| 31 | XGB,<br>RFE | {'colsample_bytree': 0.6, 'gamma': 0.5, 'max_depth': 2,<br>'min_child_weight': 5, 'random_state': 31, 'subsample': 0.6} | 1  | 15 | 14 | 6  | 5  | 9  | 8  | 2  | 11 | 7  | 12 | 16 | 10 | 3 | 13 | 17 |  |
| 32 | XGB,<br>RFE | {'colsample_bytree': 0.6, 'gamma': 0.5, 'max_depth': 2,<br>'min_child_weight': 5, 'random_state': 32, 'subsample': 0.6} | 9  | 14 | 5  | 1  | 2  | 15 | 10 | 3  | 12 | 4  | 6  | 7  | 16 | 8 | 11 | 17 |  |
| 33 | XGB,<br>RFE | {'colsample_bytree': 0.6, 'gamma': 0.5, 'max_depth': 2,<br>'min_child_weight': 5, 'random_state': 33, 'subsample': 0.6} | 5  | 16 | 14 | 3  | 1  | 10 | 9  | 2  | 12 | 11 | 4  | 15 | 13 | 7 | 6  | 17 |  |
| 34 | XGB,<br>RFE | {'colsample_bytree': 0.6, 'gamma': 0.5, 'max_depth': 2,<br>'min_child_weight': 5, 'random_state': 34, 'subsample': 0.6} | 2  | 14 | 12 | 3  | 4  | 8  | 7  | 10 | 16 | 11 | 5  | 9  | 15 | 1 | 13 | 17 |  |
| 35 | XGB,<br>RFE | {'colsample_bytree': 0.6, 'gamma': 0.5, 'max_depth': 2,<br>'min_child_weight': 5, 'random_state': 35, 'subsample': 0.6} | 12 | 15 | 14 | 5  | 2  | 11 | 6  | 3  | 8  | 10 | 4  | 9  | 16 | 1 | 7  | 17 |  |
| 36 | XGB,<br>RFE | {'colsample_bytree': 0.6, 'gamma': 0.5, 'max_depth': 2,<br>'min_child_weight': 5, 'random_state': 36, 'subsample': 0.6} | 2  | 17 | 13 | 8  | 1  | 10 | 7  | 5  | 4  | 6  | 9  | 11 | 15 | 3 | 12 | 16 |  |
| 37 | XGB,<br>RFE | {'colsample_bytree': 0.6, 'gamma': 0.5, 'max_depth': 2,<br>'min_child_weight': 5, 'random_state': 37, 'subsample': 0.6} | 4  | 17 | 8  | 1  | 12 | 3  | 5  | 9  | 11 | 6  | 7  | 15 | 14 | 2 | 10 | 16 |  |
| 38 | XGB,<br>RFE | {'colsample_bytree': 0.6, 'gamma': 0.5, 'max_depth': 2,<br>'min_child_weight': 5, 'random_state': 38, 'subsample': 0.6} | 1  | 16 | 3  | 8  | 7  | 10 | 5  | 6  | 9  | 13 | 14 | 4  | 15 | 2 | 11 | 17 |  |
| 39 | XGB,<br>RFE | {'colsample_bytree': 0.6, 'gamma': 0.5, 'max_depth': 2,<br>'min_child_weight': 5, 'random_state': 39, 'subsample': 0.6} | 9  | 13 | 10 | 2  | 1  | 14 | 8  | 3  | 12 | 7  | 15 | 4  | 16 | 5 | 6  | 17 |  |
| 40 | XGB,<br>RFE | {'colsample_bytree': 0.6, 'gamma': 0.5, 'max_depth': 2,<br>'min_child_weight': 5, 'random_state': 40, 'subsample': 0.6} | 8  | 16 | 13 | 2  | 3  | 4  | 11 | 6  | 9  | 12 | 1  | 5  | 15 | 7 | 10 | 17 |  |
| 41 | XGB,<br>RFE | {'colsample_bytree': 0.6, 'gamma': 0.5, 'max_depth': 2,<br>'min_child_weight': 5, 'random_state': 41, 'subsample': 0.6} | 12 | 17 | 3  | 9  | 1  | 10 | 7  | 6  | 16 | 8  | 4  | 11 | 14 | 2 | 5  | 13 |  |
| 42 | XGB,<br>RFE | {'colsample_bytree': 0.6, 'gamma': 0.5, 'max_depth': 2,<br>'min_child_weight': 5, 'random_state': 42, 'subsample': 0.6} | 9  | 13 | 16 | 1  | 3  | 11 | 8  | 7  | 15 | 4  | 6  | 5  | 14 | 2 | 10 | 17 |  |

|    |             |                                                                                                                         |    |    |    |    |    |    |    |   |    |    |    |    |    |   |    |    |
|----|-------------|-------------------------------------------------------------------------------------------------------------------------|----|----|----|----|----|----|----|---|----|----|----|----|----|---|----|----|
| 43 | XGB,<br>RFE | {'colsample_bytree': 0.6, 'gamma': 0.5, 'max_depth': 2,<br>'min_child_weight': 5, 'random_state': 43, 'subsample': 0.6} | 7  | 15 | 11 | 9  | 3  | 12 | 1  | 5 | 13 | 8  | 10 | 4  | 14 | 2 | 6  | 16 |
| 44 | XGB,<br>RFE | {'colsample_bytree': 0.6, 'gamma': 0.5, 'max_depth': 2,<br>'min_child_weight': 5, 'random_state': 44, 'subsample': 0.6} | 5  | 16 | 10 | 3  | 2  | 6  | 9  | 4 | 14 | 7  | 12 | 8  | 11 | 1 | 15 | 17 |
| 45 | XGB,<br>RFE | {'colsample_bytree': 0.6, 'gamma': 0.5, 'max_depth': 2,<br>'min_child_weight': 5, 'random_state': 45, 'subsample': 0.6} | 7  | 16 | 3  | 6  | 2  | 5  | 8  | 4 | 15 | 11 | 9  | 17 | 14 | 1 | 13 | 10 |
| 46 | XGB,<br>RFE | {'colsample_bytree': 0.6, 'gamma': 0.5, 'max_depth': 2,<br>'min_child_weight': 5, 'random_state': 46, 'subsample': 0.6} | 4  | 16 | 15 | 1  | 8  | 12 | 10 | 3 | 7  | 6  | 14 | 5  | 11 | 2 | 13 | 17 |
| 47 | XGB,<br>RFE | {'colsample_bytree': 0.6, 'gamma': 0.5, 'max_depth': 2,<br>'min_child_weight': 5, 'random_state': 47, 'subsample': 0.6} | 1  | 17 | 14 | 5  | 10 | 8  | 4  | 7 | 12 | 11 | 6  | 2  | 13 | 3 | 9  | 16 |
| 48 | XGB,<br>RFE | {'colsample_bytree': 0.6, 'gamma': 0.5, 'max_depth': 2,<br>'min_child_weight': 5, 'random_state': 48, 'subsample': 0.6} | 6  | 14 | 12 | 8  | 2  | 3  | 9  | 5 | 16 | 7  | 10 | 4  | 13 | 1 | 11 | 15 |
| 49 | XGB,<br>RFE | {'colsample_bytree': 0.6, 'gamma': 0.5, 'max_depth': 2,<br>'min_child_weight': 5, 'random_state': 49, 'subsample': 0.6} | 4  | 16 | 6  | 9  | 7  | 12 | 1  | 3 | 10 | 13 | 8  | 5  | 14 | 2 | 11 | 17 |
| 50 | XGB,<br>RFE | {'colsample_bytree': 0.6, 'gamma': 0.5, 'max_depth': 2,<br>'min_child_weight': 5, 'random_state': 50, 'subsample': 0.6} | 10 | 17 | 8  | 4  | 1  | 3  | 5  | 7 | 15 | 6  | 12 | 9  | 11 | 2 | 13 | 14 |
| 51 | XGB,<br>RFE | {'colsample_bytree': 0.6, 'gamma': 0.5, 'max_depth': 2,<br>'min_child_weight': 5, 'random_state': 51, 'subsample': 0.6} | 1  | 16 | 10 | 3  | 2  | 8  | 7  | 5 | 11 | 9  | 4  | 14 | 13 | 6 | 12 | 17 |
| 52 | XGB,<br>RFE | {'colsample_bytree': 0.6, 'gamma': 0.5, 'max_depth': 2,<br>'min_child_weight': 5, 'random_state': 52, 'subsample': 0.6} | 10 | 12 | 7  | 8  | 2  | 9  | 1  | 3 | 15 | 6  | 11 | 4  | 14 | 5 | 13 | 17 |
| 53 | XGB,<br>RFE | {'colsample_bytree': 0.6, 'gamma': 0.5, 'max_depth': 2,<br>'min_child_weight': 5, 'random_state': 53, 'subsample': 0.6} | 5  | 17 | 3  | 11 | 2  | 14 | 10 | 7 | 12 | 6  | 8  | 4  | 13 | 1 | 9  | 16 |
| 54 | XGB,<br>RFE | {'colsample_bytree': 0.6, 'gamma': 0.5, 'max_depth': 2,<br>'min_child_weight': 5, 'random_state': 54, 'subsample': 0.6} | 1  | 14 | 12 | 9  | 2  | 8  | 11 | 6 | 3  | 7  | 15 | 5  | 16 | 4 | 10 | 17 |
| 55 | XGB,<br>RFE | {'colsample_bytree': 0.6, 'gamma': 0.5, 'max_depth': 2,<br>'min_child_weight': 5, 'random_state': 55, 'subsample': 0.6} | 1  | 16 | 9  | 2  | 5  | 10 | 8  | 7 | 12 | 4  | 14 | 6  | 15 | 3 | 11 | 17 |
| 56 | XGB,<br>RFE | {'colsample_bytree': 0.6, 'gamma': 0.5, 'max_depth': 2,<br>'min_child_weight': 5, 'random_state': 56, 'subsample': 0.6} | 2  | 15 | 11 | 8  | 1  | 5  | 7  | 9 | 14 | 10 | 4  | 13 | 16 | 3 | 6  | 17 |
| 57 | XGB,<br>RFE | {'colsample_bytree': 0.6, 'gamma': 0.5, 'max_depth': 2,<br>'min_child_weight': 5, 'random_state': 57, 'subsample': 0.6} | 1  | 10 | 11 | 9  | 2  | 6  | 5  | 7 | 16 | 13 | 3  | 8  | 15 | 4 | 14 | 17 |

|    |             |                                                                                                                         |    |    |    |   |   |    |    |    |    |    |    |    |    |    |    |    |
|----|-------------|-------------------------------------------------------------------------------------------------------------------------|----|----|----|---|---|----|----|----|----|----|----|----|----|----|----|----|
| 58 | XGB,<br>RFE | {'colsample_bytree': 0.6, 'gamma': 0.5, 'max_depth': 2,<br>'min_child_weight': 5, 'random_state': 58, 'subsample': 0.6} | 10 | 16 | 13 | 5 | 1 | 7  | 2  | 12 | 15 | 9  | 4  | 6  | 14 | 3  | 11 | 17 |
| 59 | XGB,<br>RFE | {'colsample_bytree': 0.6, 'gamma': 0.5, 'max_depth': 2,<br>'min_child_weight': 5, 'random_state': 59, 'subsample': 0.6} | 5  | 17 | 10 | 4 | 1 | 12 | 9  | 3  | 13 | 7  | 8  | 11 | 14 | 2  | 6  | 16 |
| 60 | XGB,<br>RFE | {'colsample_bytree': 0.6, 'gamma': 0.5, 'max_depth': 2,<br>'min_child_weight': 5, 'random_state': 60, 'subsample': 0.6} | 5  | 9  | 11 | 4 | 1 | 12 | 8  | 3  | 14 | 15 | 2  | 7  | 16 | 6  | 13 | 17 |
| 61 | XGB,<br>RFE | {'colsample_bytree': 0.6, 'gamma': 0.5, 'max_depth': 2,<br>'min_child_weight': 5, 'random_state': 61, 'subsample': 0.6} | 8  | 14 | 15 | 1 | 2 | 6  | 4  | 5  | 12 | 7  | 11 | 9  | 13 | 3  | 10 | 17 |
| 62 | XGB,<br>RFE | {'colsample_bytree': 0.6, 'gamma': 0.5, 'max_depth': 2,<br>'min_child_weight': 5, 'random_state': 62, 'subsample': 0.6} | 13 | 17 | 10 | 1 | 4 | 8  | 3  | 6  | 14 | 5  | 12 | 9  | 15 | 2  | 7  | 16 |
| 63 | XGB,<br>RFE | {'colsample_bytree': 0.6, 'gamma': 0.5, 'max_depth': 2,<br>'min_child_weight': 5, 'random_state': 63, 'subsample': 0.6} | 1  | 17 | 10 | 9 | 3 | 6  | 7  | 11 | 8  | 12 | 4  | 14 | 13 | 2  | 5  | 16 |
| 64 | XGB,<br>RFE | {'colsample_bytree': 0.6, 'gamma': 0.5, 'max_depth': 2,<br>'min_child_weight': 5, 'random_state': 64, 'subsample': 0.6} | 12 | 16 | 11 | 1 | 3 | 13 | 2  | 5  | 14 | 7  | 8  | 6  | 15 | 4  | 10 | 17 |
| 65 | XGB,<br>RFE | {'colsample_bytree': 0.6, 'gamma': 0.5, 'max_depth': 2,<br>'min_child_weight': 5, 'random_state': 65, 'subsample': 0.6} | 3  | 13 | 16 | 5 | 4 | 10 | 1  | 7  | 15 | 8  | 6  | 14 | 11 | 2  | 12 | 17 |
| 66 | XGB,<br>RFE | {'colsample_bytree': 0.6, 'gamma': 0.5, 'max_depth': 2,<br>'min_child_weight': 5, 'random_state': 66, 'subsample': 0.6} | 5  | 15 | 12 | 1 | 4 | 9  | 13 | 3  | 7  | 6  | 8  | 11 | 17 | 2  | 10 | 16 |
| 67 | XGB,<br>RFE | {'colsample_bytree': 0.6, 'gamma': 0.5, 'max_depth': 2,<br>'min_child_weight': 5, 'random_state': 67, 'subsample': 0.6} | 1  | 13 | 5  | 9 | 2 | 12 | 3  | 11 | 14 | 6  | 8  | 7  | 17 | 10 | 4  | 16 |
| 68 | XGB,<br>RFE | {'colsample_bytree': 0.6, 'gamma': 0.5, 'max_depth': 2,<br>'min_child_weight': 5, 'random_state': 68, 'subsample': 0.6} | 10 | 17 | 11 | 1 | 7 | 2  | 4  | 5  | 12 | 6  | 13 | 14 | 15 | 3  | 9  | 16 |
| 69 | XGB,<br>RFE | {'colsample_bytree': 0.6, 'gamma': 0.5, 'max_depth': 2,<br>'min_child_weight': 5, 'random_state': 69, 'subsample': 0.6} | 7  | 15 | 13 | 5 | 1 | 2  | 6  | 4  | 14 | 11 | 8  | 12 | 17 | 3  | 9  | 16 |
| 70 | XGB,<br>RFE | {'colsample_bytree': 0.6, 'gamma': 0.5, 'max_depth': 2,<br>'min_child_weight': 5, 'random_state': 70, 'subsample': 0.6} | 1  | 14 | 6  | 4 | 7 | 9  | 12 | 2  | 17 | 11 | 5  | 8  | 13 | 3  | 10 | 16 |
| 71 | XGB,<br>RFE | {'colsample_bytree': 0.6, 'gamma': 0.5, 'max_depth': 2,<br>'min_child_weight': 5, 'random_state': 71, 'subsample': 0.6} | 13 | 11 | 3  | 4 | 1 | 7  | 10 | 12 | 14 | 8  | 5  | 9  | 16 | 2  | 6  | 17 |
| 72 | XGB,<br>RFE | {'colsample_bytree': 0.6, 'gamma': 0.5, 'max_depth': 2,<br>'min_child_weight': 5, 'random_state': 72, 'subsample': 0.6} | 11 | 14 | 10 | 9 | 4 | 7  | 1  | 3  | 12 | 6  | 2  | 13 | 16 | 5  | 8  | 17 |

|    |             |                                                                                                                         |   |    |    |    |    |    |    |    |    |    |    |    |    |   |    |    |
|----|-------------|-------------------------------------------------------------------------------------------------------------------------|---|----|----|----|----|----|----|----|----|----|----|----|----|---|----|----|
| 73 | XGB,<br>RFE | {'colsample_bytree': 0.6, 'gamma': 0.5, 'max_depth': 2,<br>'min_child_weight': 5, 'random_state': 73, 'subsample': 0.6} | 2 | 13 | 14 | 5  | 7  | 10 | 8  | 6  | 11 | 3  | 12 | 1  | 15 | 4 | 9  | 17 |
| 74 | XGB,<br>RFE | {'colsample_bytree': 0.6, 'gamma': 0.5, 'max_depth': 2,<br>'min_child_weight': 5, 'random_state': 74, 'subsample': 0.6} | 7 | 15 | 10 | 3  | 5  | 8  | 11 | 4  | 13 | 12 | 16 | 1  | 14 | 2 | 9  | 17 |
| 75 | XGB,<br>RFE | {'colsample_bytree': 0.6, 'gamma': 0.5, 'max_depth': 2,<br>'min_child_weight': 5, 'random_state': 75, 'subsample': 0.6} | 8 | 16 | 14 | 10 | 1  | 4  | 5  | 3  | 15 | 12 | 6  | 9  | 13 | 2 | 7  | 17 |
| 76 | XGB,<br>RFE | {'colsample_bytree': 0.6, 'gamma': 0.5, 'max_depth': 2,<br>'min_child_weight': 5, 'random_state': 76, 'subsample': 0.6} | 2 | 15 | 3  | 7  | 10 | 11 | 9  | 4  | 13 | 6  | 5  | 1  | 17 | 8 | 12 | 16 |
| 77 | XGB,<br>RFE | {'colsample_bytree': 0.6, 'gamma': 0.5, 'max_depth': 2,<br>'min_child_weight': 5, 'random_state': 77, 'subsample': 0.6} | 8 | 16 | 11 | 6  | 1  | 7  | 15 | 4  | 13 | 5  | 3  | 12 | 14 | 2 | 9  | 17 |
| 78 | XGB,<br>RFE | {'colsample_bytree': 0.6, 'gamma': 0.5, 'max_depth': 2,<br>'min_child_weight': 5, 'random_state': 78, 'subsample': 0.6} | 1 | 14 | 13 | 3  | 2  | 9  | 10 | 7  | 16 | 5  | 12 | 6  | 15 | 4 | 11 | 17 |
| 79 | XGB,<br>RFE | {'colsample_bytree': 0.6, 'gamma': 0.5, 'max_depth': 2,<br>'min_child_weight': 5, 'random_state': 79, 'subsample': 0.6} | 1 | 17 | 12 | 13 | 4  | 5  | 11 | 10 | 9  | 8  | 3  | 7  | 15 | 2 | 6  | 16 |
| 80 | XGB,<br>RFE | {'colsample_bytree': 0.6, 'gamma': 0.5, 'max_depth': 2,<br>'min_child_weight': 5, 'random_state': 80, 'subsample': 0.6} | 1 | 16 | 10 | 7  | 6  | 9  | 8  | 5  | 17 | 2  | 15 | 4  | 13 | 3 | 14 | 12 |
| 81 | XGB,<br>RFE | {'colsample_bytree': 0.6, 'gamma': 0.5, 'max_depth': 2,<br>'min_child_weight': 5, 'random_state': 81, 'subsample': 0.6} | 7 | 12 | 11 | 9  | 2  | 8  | 3  | 4  | 16 | 6  | 14 | 13 | 17 | 1 | 5  | 10 |
| 82 | XGB,<br>RFE | {'colsample_bytree': 0.6, 'gamma': 0.5, 'max_depth': 2,<br>'min_child_weight': 5, 'random_state': 82, 'subsample': 0.6} | 6 | 15 | 13 | 11 | 2  | 7  | 5  | 10 | 12 | 8  | 9  | 1  | 16 | 4 | 3  | 17 |
| 83 | XGB,<br>RFE | {'colsample_bytree': 0.6, 'gamma': 0.5, 'max_depth': 2,<br>'min_child_weight': 5, 'random_state': 83, 'subsample': 0.6} | 1 | 16 | 7  | 11 | 3  | 9  | 10 | 5  | 12 | 14 | 4  | 6  | 13 | 2 | 8  | 17 |
| 84 | XGB,<br>RFE | {'colsample_bytree': 0.6, 'gamma': 0.5, 'max_depth': 2,<br>'min_child_weight': 5, 'random_state': 84, 'subsample': 0.6} | 9 | 14 | 11 | 1  | 10 | 3  | 6  | 5  | 13 | 8  | 12 | 4  | 15 | 2 | 7  | 17 |
| 85 | XGB,<br>RFE | {'colsample_bytree': 0.6, 'gamma': 0.5, 'max_depth': 2,<br>'min_child_weight': 5, 'random_state': 85, 'subsample': 0.6} | 2 | 14 | 15 | 10 | 1  | 9  | 11 | 4  | 7  | 6  | 13 | 16 | 8  | 3 | 5  | 17 |
| 86 | XGB,<br>RFE | {'colsample_bytree': 0.6, 'gamma': 0.5, 'max_depth': 2,<br>'min_child_weight': 5, 'random_state': 86, 'subsample': 0.6} | 1 | 15 | 6  | 9  | 2  | 13 | 4  | 7  | 14 | 5  | 10 | 12 | 16 | 3 | 8  | 17 |
| 87 | XGB,<br>RFE | {'colsample_bytree': 0.6, 'gamma': 0.5, 'max_depth': 2,<br>'min_child_weight': 5, 'random_state': 87, 'subsample': 0.6} | 8 | 14 | 9  | 10 | 1  | 4  | 13 | 6  | 15 | 5  | 12 | 7  | 17 | 2 | 3  | 16 |

|    |             |                                                                                                                         |    |    |    |    |   |    |    |    |    |    |    |    |    |   |    |    |  |
|----|-------------|-------------------------------------------------------------------------------------------------------------------------|----|----|----|----|---|----|----|----|----|----|----|----|----|---|----|----|--|
| 88 | XGB,<br>RFE | {'colsample_bytree': 0.6, 'gamma': 0.5, 'max_depth': 2,<br>'min_child_weight': 5, 'random_state': 88, 'subsample': 0.6} | 6  | 16 | 8  | 9  | 4 | 5  | 7  | 3  | 12 | 14 | 11 | 1  | 15 | 2 | 10 | 17 |  |
| 89 | XGB,<br>RFE | {'colsample_bytree': 0.6, 'gamma': 0.5, 'max_depth': 2,<br>'min_child_weight': 5, 'random_state': 89, 'subsample': 0.6} | 1  | 15 | 11 | 5  | 2 | 12 | 13 | 7  | 16 | 4  | 9  | 6  | 8  | 3 | 10 | 17 |  |
| 90 | XGB,<br>RFE | {'colsample_bytree': 0.6, 'gamma': 0.5, 'max_depth': 2,<br>'min_child_weight': 5, 'random_state': 90, 'subsample': 0.6} | 5  | 12 | 13 | 1  | 3 | 7  | 8  | 4  | 6  | 9  | 16 | 11 | 15 | 2 | 10 | 17 |  |
| 91 | XGB,<br>RFE | {'colsample_bytree': 0.6, 'gamma': 0.5, 'max_depth': 2,<br>'min_child_weight': 5, 'random_state': 91, 'subsample': 0.6} | 1  | 17 | 12 | 2  | 7 | 4  | 10 | 13 | 16 | 9  | 15 | 5  | 14 | 3 | 6  | 11 |  |
| 92 | XGB,<br>RFE | {'colsample_bytree': 0.6, 'gamma': 0.5, 'max_depth': 2,<br>'min_child_weight': 5, 'random_state': 92, 'subsample': 0.6} | 3  | 16 | 8  | 6  | 2 | 9  | 11 | 5  | 10 | 12 | 13 | 1  | 15 | 4 | 7  | 17 |  |
| 93 | XGB,<br>RFE | {'colsample_bytree': 0.6, 'gamma': 0.5, 'max_depth': 2,<br>'min_child_weight': 5, 'random_state': 93, 'subsample': 0.6} | 1  | 14 | 12 | 8  | 9 | 2  | 10 | 3  | 5  | 4  | 15 | 13 | 11 | 6 | 7  | 17 |  |
| 94 | XGB,<br>RFE | {'colsample_bytree': 0.6, 'gamma': 0.5, 'max_depth': 2,<br>'min_child_weight': 5, 'random_state': 94, 'subsample': 0.6} | 10 | 16 | 11 | 4  | 3 | 9  | 1  | 8  | 15 | 6  | 5  | 7  | 14 | 2 | 13 | 17 |  |
| 95 | XGB,<br>RFE | {'colsample_bytree': 0.6, 'gamma': 0.5, 'max_depth': 2,<br>'min_child_weight': 5, 'random_state': 95, 'subsample': 0.6} | 8  | 14 | 13 | 2  | 5 | 6  | 10 | 3  | 12 | 4  | 9  | 11 | 15 | 1 | 7  | 17 |  |
| 96 | XGB,<br>RFE | {'colsample_bytree': 0.6, 'gamma': 0.5, 'max_depth': 2,<br>'min_child_weight': 5, 'random_state': 96, 'subsample': 0.6} | 9  | 16 | 12 | 6  | 2 | 8  | 1  | 4  | 11 | 10 | 5  | 7  | 15 | 3 | 13 | 17 |  |
| 97 | XGB,<br>RFE | {'colsample_bytree': 0.6, 'gamma': 0.5, 'max_depth': 2,<br>'min_child_weight': 5, 'random_state': 97, 'subsample': 0.6} | 5  | 12 | 7  | 4  | 1 | 9  | 8  | 3  | 14 | 13 | 6  | 15 | 11 | 2 | 10 | 17 |  |
| 98 | XGB,<br>RFE | {'colsample_bytree': 0.6, 'gamma': 0.5, 'max_depth': 2,<br>'min_child_weight': 5, 'random_state': 98, 'subsample': 0.6} | 10 | 17 | 9  | 2  | 1 | 5  | 12 | 3  | 15 | 4  | 8  | 7  | 13 | 6 | 11 | 16 |  |
| 99 | XGB,<br>RFE | {'colsample_bytree': 0.6, 'gamma': 0.5, 'max_depth': 2,<br>'min_child_weight': 5, 'random_state': 99, 'subsample': 0.6} | 1  | 11 | 4  | 13 | 2 | 12 | 7  | 5  | 14 | 8  | 6  | 10 | 16 | 3 | 9  | 17 |  |
| 0  | AVG         |                                                                                                                         | 8  | 12 | 10 | 5  | 1 | 4  | 3  | 2  | 13 | 7  | 6  | 9  | 15 | 0 | 11 | 16 |  |
| 1  | AVG         |                                                                                                                         | 7  | 15 | 8  | 5  | 0 | 9  | 2  | 4  | 11 | 6  | 3  | 10 | 13 | 1 | 12 | 16 |  |
| 2  | AVG         |                                                                                                                         | 8  | 13 | 11 | 6  | 0 | 5  | 4  | 2  | 12 | 7  | 3  | 9  | 15 | 1 | 10 | 16 |  |
| 3  | AVG         |                                                                                                                         | 6  | 12 | 11 | 7  | 1 | 8  | 5  | 2  | 14 | 4  | 3  | 10 | 13 | 0 | 9  | 16 |  |
| 4  | AVG         |                                                                                                                         | 7  | 13 | 12 | 5  | 2 | 4  | 1  | 0  | 16 | 6  | 8  | 10 | 14 | 3 | 9  | 15 |  |
| 5  | AVG         |                                                                                                                         | 3  | 16 | 10 | 2  | 1 | 5  | 6  | 4  | 14 | 8  | 9  | 11 | 12 | 0 | 7  | 15 |  |
| 6  | AVG         |                                                                                                                         | 9  | 12 | 10 | 6  | 0 | 4  | 3  | 2  | 13 | 5  | 7  | 11 | 14 | 1 | 8  | 16 |  |

|    |     |  |   |    |    |    |   |    |    |   |    |   |    |    |    |   |    |    |  |
|----|-----|--|---|----|----|----|---|----|----|---|----|---|----|----|----|---|----|----|--|
| 7  | AVG |  | 3 | 15 | 8  | 9  | 0 | 5  | 7  | 1 | 14 | 6 | 4  | 10 | 13 | 2 | 11 | 16 |  |
| 8  | AVG |  | 3 | 14 | 8  | 11 | 0 | 7  | 2  | 6 | 13 | 5 | 4  | 9  | 12 | 1 | 10 | 16 |  |
| 9  | AVG |  | 6 | 15 | 10 | 3  | 0 | 7  | 4  | 2 | 13 | 8 | 5  | 12 | 11 | 1 | 9  | 16 |  |
| 10 | AVG |  | 8 | 13 | 10 | 11 | 0 | 7  | 3  | 2 | 14 | 4 | 6  | 9  | 15 | 1 | 5  | 16 |  |
| 11 | AVG |  | 5 | 15 | 9  | 7  | 0 | 8  | 10 | 1 | 14 | 6 | 3  | 11 | 12 | 2 | 4  | 16 |  |
| 12 | AVG |  | 2 | 15 | 9  | 6  | 1 | 10 | 7  | 4 | 13 | 3 | 5  | 11 | 14 | 0 | 8  | 16 |  |
| 13 | AVG |  | 3 | 15 | 12 | 5  | 1 | 6  | 4  | 2 | 14 | 9 | 7  | 8  | 13 | 0 | 10 | 16 |  |
| 14 | AVG |  | 8 | 16 | 10 | 3  | 0 | 2  | 4  | 5 | 13 | 7 | 6  | 12 | 11 | 1 | 9  | 15 |  |
| 15 | AVG |  | 3 | 13 | 10 | 4  | 1 | 9  | 7  | 2 | 14 | 6 | 5  | 11 | 12 | 0 | 8  | 16 |  |
| 16 | AVG |  | 9 | 14 | 11 | 3  | 0 | 6  | 2  | 4 | 15 | 7 | 5  | 10 | 12 | 1 | 8  | 16 |  |
| 17 | AVG |  | 4 | 12 | 11 | 5  | 0 | 9  | 6  | 2 | 15 | 3 | 10 | 8  | 13 | 1 | 7  | 16 |  |
| 18 | AVG |  | 8 | 16 | 11 | 2  | 0 | 9  | 3  | 4 | 13 | 7 | 5  | 6  | 12 | 1 | 10 | 15 |  |
| 19 | AVG |  | 5 | 14 | 11 | 3  | 0 | 6  | 9  | 2 | 15 | 8 | 7  | 4  | 12 | 1 | 10 | 16 |  |
| 20 | AVG |  | 2 | 14 | 8  | 9  | 0 | 5  | 11 | 3 | 13 | 4 | 7  | 6  | 12 | 1 | 10 | 16 |  |
| 21 | AVG |  | 7 | 14 | 10 | 3  | 0 | 9  | 8  | 6 | 13 | 2 | 4  | 5  | 16 | 1 | 11 | 15 |  |
| 22 | AVG |  | 7 | 15 | 11 | 9  | 0 | 8  | 1  | 4 | 14 | 5 | 6  | 3  | 13 | 2 | 10 | 16 |  |
| 23 | AVG |  | 2 | 14 | 12 | 7  | 0 | 8  | 5  | 3 | 15 | 6 | 4  | 10 | 13 | 1 | 11 | 16 |  |
| 24 | AVG |  | 5 | 14 | 10 | 6  | 0 | 7  | 4  | 3 | 11 | 2 | 8  | 12 | 15 | 1 | 9  | 16 |  |
| 25 | AVG |  | 6 | 14 | 11 | 4  | 0 | 9  | 2  | 3 | 16 | 5 | 8  | 10 | 15 | 1 | 7  | 13 |  |
| 26 | AVG |  | 4 | 13 | 11 | 7  | 0 | 8  | 1  | 3 | 14 | 9 | 5  | 6  | 16 | 2 | 10 | 15 |  |
| 27 | AVG |  | 1 | 15 | 11 | 4  | 3 | 7  | 5  | 2 | 14 | 8 | 6  | 9  | 12 | 0 | 10 | 16 |  |
| 28 | AVG |  | 4 | 13 | 6  | 5  | 0 | 7  | 11 | 2 | 15 | 3 | 8  | 10 | 14 | 1 | 9  | 16 |  |
| 29 | AVG |  | 8 | 15 | 10 | 7  | 1 | 2  | 3  | 5 | 12 | 4 | 6  | 11 | 13 | 0 | 9  | 16 |  |
| 30 | AVG |  | 7 | 14 | 11 | 1  | 3 | 5  | 6  | 2 | 13 | 4 | 9  | 10 | 12 | 0 | 8  | 16 |  |
| 31 | AVG |  | 3 | 15 | 9  | 7  | 0 | 5  | 6  | 2 | 14 | 4 | 8  | 10 | 13 | 1 | 12 | 16 |  |
| 32 | AVG |  | 7 | 15 | 9  | 4  | 0 | 11 | 5  | 1 | 14 | 8 | 3  | 6  | 13 | 2 | 10 | 16 |  |
| 33 | AVG |  | 3 | 15 | 11 | 5  | 0 | 8  | 7  | 1 | 13 | 4 | 6  | 12 | 14 | 2 | 9  | 16 |  |
| 34 | AVG |  | 2 | 15 | 10 | 5  | 0 | 8  | 4  | 3 | 13 | 6 | 7  | 12 | 14 | 1 | 9  | 16 |  |
| 35 | AVG |  | 5 | 14 | 10 | 7  | 0 | 9  | 3  | 2 | 12 | 4 | 6  | 11 | 15 | 1 | 8  | 16 |  |
| 36 | AVG |  | 3 | 16 | 11 | 9  | 0 | 7  | 4  | 2 | 12 | 5 | 6  | 8  | 13 | 1 | 10 | 15 |  |
| 37 | AVG |  | 5 | 14 | 10 | 3  | 1 | 4  | 9  | 2 | 11 | 6 | 7  | 12 | 13 | 0 | 8  | 16 |  |

|    |     |  |    |    |    |    |   |    |    |   |    |    |    |    |    |   |    |    |  |
|----|-----|--|----|----|----|----|---|----|----|---|----|----|----|----|----|---|----|----|--|
| 38 | AVG |  | 3  | 15 | 4  | 7  | 0 | 10 | 2  | 5 | 13 | 12 | 8  | 6  | 14 | 1 | 9  | 16 |  |
| 39 | AVG |  | 6  | 15 | 7  | 4  | 2 | 10 | 5  | 1 | 13 | 3  | 9  | 11 | 14 | 0 | 8  | 16 |  |
| 40 | AVG |  | 10 | 14 | 11 | 7  | 0 | 8  | 3  | 6 | 12 | 4  | 2  | 9  | 15 | 1 | 5  | 16 |  |
| 41 | AVG |  | 8  | 15 | 7  | 11 | 0 | 10 | 6  | 2 | 14 | 5  | 3  | 9  | 16 | 1 | 4  | 12 |  |
| 42 | AVG |  | 3  | 16 | 10 | 2  | 1 | 6  | 4  | 8 | 14 | 7  | 5  | 11 | 12 | 0 | 9  | 15 |  |
| 43 | AVG |  | 7  | 15 | 11 | 8  | 0 | 10 | 3  | 2 | 13 | 6  | 5  | 4  | 12 | 1 | 9  | 16 |  |
| 44 | AVG |  | 4  | 13 | 10 | 5  | 0 | 7  | 6  | 2 | 15 | 3  | 8  | 9  | 14 | 1 | 11 | 16 |  |
| 45 | AVG |  | 7  | 16 | 8  | 4  | 0 | 5  | 3  | 2 | 13 | 9  | 6  | 12 | 15 | 1 | 10 | 14 |  |
| 46 | AVG |  | 3  | 16 | 10 | 6  | 1 | 9  | 4  | 2 | 11 | 5  | 8  | 7  | 14 | 0 | 12 | 15 |  |
| 47 | AVG |  | 4  | 14 | 11 | 8  | 0 | 6  | 2  | 3 | 13 | 7  | 5  | 9  | 16 | 1 | 10 | 15 |  |
| 48 | AVG |  | 4  | 16 | 9  | 8  | 0 | 6  | 7  | 2 | 15 | 5  | 10 | 3  | 14 | 1 | 11 | 13 |  |
| 49 | AVG |  | 3  | 15 | 5  | 9  | 0 | 10 | 4  | 1 | 12 | 7  | 6  | 11 | 13 | 2 | 8  | 16 |  |
| 50 | AVG |  | 8  | 15 | 10 | 3  | 0 | 4  | 5  | 2 | 14 | 6  | 7  | 9  | 12 | 1 | 11 | 16 |  |
| 51 | AVG |  | 3  | 14 | 10 | 4  | 0 | 6  | 8  | 1 | 12 | 5  | 9  | 11 | 15 | 2 | 7  | 16 |  |
| 52 | AVG |  | 9  | 12 | 7  | 5  | 0 | 6  | 3  | 1 | 15 | 4  | 8  | 10 | 13 | 2 | 11 | 16 |  |
| 53 | AVG |  | 2  | 15 | 8  | 10 | 1 | 5  | 11 | 3 | 13 | 4  | 6  | 7  | 14 | 0 | 9  | 16 |  |
| 54 | AVG |  | 2  | 15 | 11 | 6  | 0 | 5  | 10 | 4 | 9  | 3  | 7  | 12 | 13 | 1 | 8  | 16 |  |
| 55 | AVG |  | 5  | 16 | 10 | 6  | 0 | 7  | 3  | 4 | 12 | 2  | 8  | 11 | 14 | 1 | 9  | 15 |  |
| 56 | AVG |  | 3  | 12 | 8  | 7  | 0 | 6  | 2  | 4 | 15 | 9  | 5  | 13 | 14 | 1 | 10 | 16 |  |
| 57 | AVG |  | 2  | 15 | 10 | 8  | 0 | 7  | 4  | 5 | 14 | 6  | 3  | 11 | 13 | 1 | 9  | 16 |  |
| 58 | AVG |  | 7  | 15 | 10 | 8  | 0 | 5  | 2  | 3 | 14 | 6  | 4  | 11 | 13 | 1 | 9  | 16 |  |
| 59 | AVG |  | 3  | 15 | 10 | 7  | 0 | 8  | 4  | 2 | 13 | 6  | 5  | 12 | 14 | 1 | 9  | 16 |  |
| 60 | AVG |  | 5  | 15 | 11 | 6  | 0 | 9  | 4  | 1 | 12 | 8  | 3  | 7  | 14 | 2 | 10 | 16 |  |
| 61 | AVG |  | 4  | 15 | 10 | 7  | 0 | 6  | 3  | 2 | 13 | 5  | 8  | 12 | 11 | 1 | 9  | 16 |  |
| 62 | AVG |  | 9  | 15 | 6  | 2  | 0 | 7  | 4  | 3 | 13 | 5  | 8  | 10 | 16 | 1 | 11 | 14 |  |
| 63 | AVG |  | 2  | 15 | 10 | 5  | 0 | 6  | 7  | 4 | 13 | 8  | 3  | 11 | 12 | 1 | 9  | 16 |  |
| 64 | AVG |  | 8  | 14 | 9  | 4  | 0 | 11 | 3  | 1 | 15 | 5  | 7  | 6  | 13 | 2 | 10 | 16 |  |
| 65 | AVG |  | 3  | 13 | 11 | 7  | 1 | 9  | 2  | 5 | 15 | 6  | 4  | 10 | 14 | 0 | 8  | 16 |  |
| 66 | AVG |  | 5  | 14 | 9  | 3  | 0 | 6  | 7  | 4 | 10 | 2  | 11 | 12 | 13 | 1 | 8  | 16 |  |
| 67 | AVG |  | 1  | 14 | 10 | 6  | 0 | 7  | 3  | 5 | 12 | 2  | 8  | 11 | 13 | 4 | 9  | 16 |  |
| 68 | AVG |  | 8  | 16 | 11 | 4  | 0 | 5  | 3  | 2 | 13 | 6  | 7  | 12 | 14 | 1 | 9  | 15 |  |



|    |     |  |    |    |    |    |   |    |    |    |    |    |    |    |    |   |    |    |  |
|----|-----|--|----|----|----|----|---|----|----|----|----|----|----|----|----|---|----|----|--|
| 69 | AVG |  | 7  | 15 | 10 | 4  | 0 | 3  | 6  | 2  | 14 | 5  | 8  | 11 | 13 | 1 | 9  | 16 |  |
| 70 | AVG |  | 2  | 14 | 10 | 4  | 3 | 8  | 5  | 0  | 15 | 6  | 7  | 9  | 12 | 1 | 11 | 16 |  |
| 71 | AVG |  | 9  | 13 | 10 | 3  | 0 | 4  | 11 | 6  | 15 | 7  | 2  | 8  | 12 | 1 | 5  | 16 |  |
| 72 | AVG |  | 7  | 13 | 10 | 9  | 0 | 6  | 1  | 4  | 12 | 5  | 3  | 11 | 14 | 2 | 8  | 16 |  |
| 73 | AVG |  | 6  | 14 | 11 | 3  | 0 | 9  | 7  | 2  | 13 | 4  | 8  | 5  | 12 | 1 | 10 | 16 |  |
| 74 | AVG |  | 6  | 16 | 10 | 3  | 0 | 9  | 4  | 2  | 14 | 7  | 11 | 5  | 13 | 1 | 8  | 15 |  |
| 75 | AVG |  | 7  | 13 | 11 | 4  | 0 | 5  | 2  | 8  | 14 | 3  | 6  | 10 | 15 | 1 | 9  | 16 |  |
| 76 | AVG |  | 3  | 15 | 8  | 10 | 0 | 7  | 6  | 1  | 13 | 5  | 4  | 9  | 16 | 2 | 11 | 14 |  |
| 77 | AVG |  | 4  | 15 | 12 | 7  | 0 | 5  | 6  | 2  | 13 | 3  | 10 | 8  | 14 | 1 | 9  | 16 |  |
| 78 | AVG |  | 3  | 13 | 12 | 2  | 0 | 6  | 7  | 5  | 14 | 4  | 9  | 8  | 16 | 1 | 10 | 15 |  |
| 79 | AVG |  | 2  | 16 | 10 | 9  | 0 | 4  | 8  | 7  | 13 | 5  | 3  | 11 | 12 | 1 | 6  | 15 |  |
| 80 | AVG |  | 4  | 15 | 10 | 6  | 2 | 7  | 5  | 1  | 14 | 3  | 9  | 8  | 16 | 0 | 11 | 13 |  |
| 81 | AVG |  | 3  | 12 | 10 | 7  | 1 | 5  | 6  | 2  | 13 | 4  | 11 | 9  | 16 | 0 | 8  | 15 |  |
| 82 | AVG |  | 3  | 14 | 9  | 10 | 0 | 7  | 2  | 4  | 13 | 11 | 6  | 5  | 15 | 1 | 8  | 16 |  |
| 83 | AVG |  | 1  | 14 | 11 | 5  | 2 | 7  | 6  | 0  | 12 | 9  | 4  | 8  | 15 | 3 | 10 | 16 |  |
| 84 | AVG |  | 10 | 12 | 11 | 5  | 3 | 2  | 7  | 1  | 13 | 4  | 9  | 6  | 14 | 0 | 8  | 16 |  |
| 85 | AVG |  | 3  | 15 | 10 | 9  | 0 | 4  | 7  | 2  | 11 | 5  | 8  | 13 | 14 | 1 | 6  | 16 |  |
| 86 | AVG |  | 3  | 14 | 7  | 9  | 0 | 10 | 5  | 2  | 13 | 4  | 6  | 11 | 16 | 1 | 8  | 15 |  |
| 87 | AVG |  | 6  | 14 | 10 | 11 | 0 | 5  | 8  | 2  | 13 | 3  | 7  | 9  | 16 | 1 | 4  | 15 |  |
| 88 | AVG |  | 5  | 15 | 12 | 3  | 1 | 6  | 4  | 2  | 13 | 9  | 7  | 8  | 14 | 0 | 10 | 16 |  |
| 89 | AVG |  | 3  | 14 | 12 | 5  | 0 | 8  | 6  | 4  | 15 | 2  | 7  | 11 | 9  | 1 | 10 | 16 |  |
| 90 | AVG |  | 3  | 16 | 12 | 4  | 0 | 10 | 6  | 1  | 11 | 5  | 8  | 9  | 14 | 2 | 7  | 15 |  |
| 91 | AVG |  | 2  | 16 | 11 | 4  | 1 | 3  | 5  | 12 | 15 | 6  | 9  | 7  | 14 | 0 | 8  | 13 |  |
| 92 | AVG |  | 5  | 15 | 11 | 6  | 0 | 9  | 4  | 2  | 14 | 8  | 7  | 3  | 12 | 1 | 10 | 16 |  |
| 93 | AVG |  | 4  | 13 | 10 | 2  | 6 | 3  | 7  | 0  | 12 | 5  | 8  | 9  | 14 | 1 | 11 | 16 |  |
| 94 | AVG |  | 8  | 12 | 10 | 2  | 0 | 5  | 3  | 6  | 14 | 7  | 4  | 9  | 15 | 1 | 11 | 16 |  |
| 95 | AVG |  | 4  | 15 | 11 | 7  | 2 | 5  | 8  | 1  | 12 | 3  | 9  | 13 | 14 | 0 | 6  | 16 |  |
| 96 | AVG |  | 9  | 14 | 11 | 3  | 0 | 6  | 2  | 4  | 12 | 8  | 5  | 7  | 15 | 1 | 10 | 16 |  |
| 97 | AVG |  | 3  | 12 | 7  | 4  | 0 | 9  | 5  | 1  | 14 | 6  | 8  | 11 | 13 | 2 | 10 | 16 |  |
| 98 | AVG |  | 9  | 13 | 8  | 3  | 0 | 10 | 5  | 1  | 15 | 4  | 6  | 11 | 16 | 2 | 7  | 14 |  |
| 99 | AVG |  | 7  | 12 | 4  | 5  | 0 | 11 | 6  | 2  | 15 | 8  | 3  | 9  | 13 | 1 | 10 | 16 |  |



f. **Supplementary Table S2c:** : Feature group ranking results: top ranking feature groups.

“Selected features” shows the features in the group, “Feature selection method” shows the ranking method from which the feature group was derived. “AUC score” represents the assessment metric for group ranking, and is equal to the average AUC of the top performing 10% of the models (search grid presented in point 3.a) trained on the group.

E.g. the top row in the “One-month VT recurrence” table represents the feature group with the highest AUC score, derived from the top 6 features of the feature ranking determined using permutation importance and a multilayer perceptron model.

i. One-month VT recurrence endpoint

| Selected features                                                                            | Feature selection method | Number of features | AUC score |
|----------------------------------------------------------------------------------------------|--------------------------|--------------------|-----------|
| EF, TAPSE, ICD shock, HD instability, Incessant VT, Clinical VT eliminated                   | MLP, PI                  | 6                  | 0.707     |
| EF, TAPSE, ICD shock, HD instability, Clinical VT eliminated                                 | MLP, PI                  | 5                  | 0.704     |
| EF, TAPSE, ICD shock, HD instability, Incessant VT, Electrical storm, Clinical VT eliminated | MLP, PI                  | 7                  | 0.702     |
| EF, LVESD, TAPSE, HD instability                                                             | RF, PI                   | 4                  | 0.698     |
| EF, LVESD, TAPSE, HD instability                                                             | SUM                      | 4                  | 0.698     |
| TAPSE, ICD shock, HD instability, Clinical VT eliminated                                     | MLP, PI                  | 4                  | 0.691     |
| Age, EF, LVESD, TAPSE, HD instability, Clinical VT eliminated                                | RF, PI                   | 6                  | 0.682     |
| Age, EF, LVESD, TAPSE, HD instability, Clinical VT eliminated                                | SUM                      | 6                  | 0.682     |
| Age, EF, LVESD, TAPSE, HD instability                                                        | SUM                      | 5                  | 0.680     |
| Age, EF, LVESD, TAPSE, HD instability                                                        | RF, PI                   | 5                  | 0.680     |
| Age, EF, LVESD, TAPSE, HD instability, Clinical VT cycle length, Clinical VT eliminated      | SUM                      | 7                  | 0.670     |
| Age, EF, LVESD, TAPSE, HD instability, Clinical VT cycle length, Clinical VT eliminated      | RF, PI                   | 7                  | 0.670     |
| Age, EF, LVESD, HD instability, Clinical VT eliminated                                       | XGB, RFE                 | 5                  | 0.661     |
| Age, EF, HD instability, Clinical VT eliminated                                              | XGB, RFE                 | 4                  | 0.659     |

|                                                                                                                 |          |   |       |
|-----------------------------------------------------------------------------------------------------------------|----------|---|-------|
| Age, EF, LVESD, TAPSE, E wave deceleration time (DT), HD instability, Clinical VT cycle length                  | XGB, PI  | 7 | 0.649 |
| Age, EF, LVESD, E wave deceleration time (DT), HD instability, Clinical VT eliminated                           | XGB, RFE | 6 | 0.648 |
| Age, EF, LVESD, E wave deceleration time (DT), HD instability, Clinical VT cycle length, Clinical VT eliminated | XGB, RFE | 7 | 0.633 |
| Age, EF, TAPSE, E wave deceleration time (DT), Clinical VT cycle length                                         | XGB, PI  | 5 | 0.598 |
| Age, EF, LVESD, TAPSE, E wave deceleration time (DT), Clinical VT cycle length                                  | XGB, PI  | 6 | 0.597 |
| Age, EF, E wave deceleration time (DT), Clinical VT cycle length                                                | XGB, PI  | 4 | 0.568 |

ii. 1-year VT recurrence endpoint

| <b>Selected features</b>                                                                                     | <b>Feature selection method</b> | <b>Number of features</b> | <b>AUC score</b> |
|--------------------------------------------------------------------------------------------------------------|---------------------------------|---------------------------|------------------|
| LVESD, MR, ICD shock, HD instability, Inducible VT morphologies                                              | RF, PI                          | 5                         | 0.677            |
| LVESD, MR, ICD shock, HD instability, Inducible VT morphologies                                              | MLP, PI                         | 5                         | 0.677            |
| LVESD, E wave deceleration time (DT), MR, ICD shock, HD instability, Incessant_VT, Inducible VT morphologies | MLP, PI                         | 7                         | 0.675            |
| Age, LVESD, MR, ICD shock, HD instability, Inducible VT morphologies, Clinical VT cycle length               | RF, PI                          | 7                         | 0.675            |
| LVESD, MR, ICD shock, HD instability, Incessant_VT, Inducible VT morphologies                                | MLP, PI                         | 6                         | 0.675            |
| Age, LVESD, MR, ICD shock, HD instability, Inducible VT morphologies                                         | RF, PI                          | 6                         | 0.669            |
| Age, EF, LVESD, E wave deceleration time (DT), MR, ICD shock, Inducible VT morphologies                      | SUM                             | 7                         | 0.664            |

|                                                                                            |          |   |       |
|--------------------------------------------------------------------------------------------|----------|---|-------|
| Age, EF, LVESD, E wave deceleration time (DT), MR, ICD shock,<br>Inducible VT morphologies | XGB, RFE | 7 | 0.664 |
| LVESD, E wave deceleration time (DT), MR, Inducible VT<br>morphologies                     | SUM      | 4 | 0.662 |
| LVESD, MR, ICD shock, Inducible VT morphologies                                            | RF, PI   | 4 | 0.659 |
| Age, LVESD, E wave deceleration time (DT), MR, ICD shock,<br>Inducible VT morphologies     | SUM      | 6 | 0.655 |
| MR, ICD shock, HD instability, Inducible VT morphologies                                   | MLP, PI  | 4 | 0.655 |
| Age, EF, LVESD, E wave deceleration time (DT), MR, Inducible VT<br>morphologies            | XGB, RFE | 6 | 0.644 |
| Age, EF, LVESD, MR, Inducible VT morphologies                                              | XGB, RFE | 5 | 0.639 |
| Age, LVESD, E wave deceleration time (DT), MR, Inducible VT<br>morphologies                | SUM      | 5 | 0.635 |
| Age, EF, LVESD, Inducible VT morphologies                                                  | XGB, RFE | 4 | 0.631 |
| Age, EF, LVESD, TAPSE, E wave deceleration time (DT), MR, Clinical<br>VT cycle length      | XGB, PI  | 7 | 0.622 |
| Age, EF, LVESD, TAPSE, E wave deceleration time (DT)                                       | XGB, PI  | 5 | 0.617 |
| Age, EF, LVESD, TAPSE, E wave deceleration time (DT), Clinical VT<br>cycle length          | XGB, PI  | 6 | 0.615 |
| Age, EF, LVESD, E wave deceleration time (DT)                                              | XGB, PI  | 4 | 0.612 |

g. **Supplementary Table S2d:** Final model selection results. Top 30 models of each grid search (each combination of model type, pre-processing and oversampling), as ranked by AUC, are presented for each endpoint. Rows are ordered so that the table starts with the model with the highest mean AUC on the test populations. “Model” shows the type of model, “Preprocessing” shows the pre-processing method used, “Parameters” shows the hyperparameters of the model during the iteration. “Mean AUC (test)” represents the average of AUCs as assessed in 10 cross-validations. “Mean AUC (train)” shows the same for the train populations.

i. 1-month VT recurrence

| Model | Preprocessing | Oversampling | Parameters                                                                                                                                                                  | Mean AUC (test) | Mean AUC (train) |
|-------|---------------|--------------|-----------------------------------------------------------------------------------------------------------------------------------------------------------------------------|-----------------|------------------|
| RF    | Not used      | Not used     | RF__class_weight : None; RF__criterion : log_loss;<br>RF__max_depth : 1; RF__max_features : 1;<br>RF__min_samples_leaf : 2; RF__n_estimators : 300;<br>RF__random_state : 0 | 0.730           | 0.758            |
| NN    | SS            | SMOTE        | NN__activation : logistic; NN__alpha :<br>0.002245921354228774; NN__hidden_layer_sizes : 3;<br>NN__max_iter : 161; NN__random_state : 0;<br>NN__solver : adam               | 0.729           | 0.727            |
| NN    | SS            | SMOTE        | NN__activation : logistic; NN__alpha :<br>0.002853339802465133; NN__hidden_layer_sizes : 3;<br>NN__max_iter : 158; NN__random_state : 0;<br>NN__solver : adam               | 0.729           | 0.727            |
| NN    | SS            | SMOTE        | NN__activation : logistic; NN__alpha : 0.0001;<br>NN__hidden_layer_sizes : 3; NN__max_iter : 148;<br>NN__random_state : 0; NN__solver : adam                                | 0.728           | 0.726            |
| RF    | SS            | SMOTE        | RF__class_weight : None; RF__criterion : log_loss;<br>RF__max_depth : 1; RF__max_features : 1;                                                                              | 0.728           | 0.738            |

|    |          |          |                                                                                                                                                                                  |       |       |
|----|----------|----------|----------------------------------------------------------------------------------------------------------------------------------------------------------------------------------|-------|-------|
|    |          |          | RF__min_samples_leaf : 20; RF__n_estimators : 419;<br>RF__random_state : 0                                                                                                       |       |       |
| RF | Not used | Not used | RF__class_weight : None; RF__criterion : log_loss;<br>RF__max_depth : 1; RF__max_features : 1;<br>RF__min_samples_leaf : 1; RF__n_estimators : 392;<br>RF__random_state : 0      | 0.727 | 0.756 |
| NN | SS       | SMOTE    | NN__activation : logistic; NN__alpha : 0.0001;<br>NN__hidden_layer_sizes : 3; NN__max_iter : 174;<br>NN__random_state : 0; NN__solver : adam                                     | 0.727 | 0.729 |
| RF | SS       | SMOTE    | RF__class_weight : None; RF__criterion : log_loss;<br>RF__max_depth : 1; RF__max_features : 1;<br>RF__min_samples_leaf : 20; RF__n_estimators : 300;<br>RF__random_state : 0     | 0.727 | 0.737 |
| RF | SS       | SMOTE    | RF__class_weight : balanced; RF__criterion : log_loss;<br>RF__max_depth : 1; RF__max_features : 1;<br>RF__min_samples_leaf : 20; RF__n_estimators : 421;<br>RF__random_state : 0 | 0.726 | 0.738 |
| RF | SS       | SMOTE    | RF__class_weight : None; RF__criterion : log_loss;<br>RF__max_depth : 1; RF__max_features : 1;<br>RF__min_samples_leaf : 20; RF__n_estimators : 447;<br>RF__random_state : 0     | 0.726 | 0.739 |
| NN | SS       | ROS      | NN__activation : logistic; NN__alpha : 10.0;<br>NN__hidden_layer_sizes : 3; NN__max_iter : 406;<br>NN__random_state : 0; NN__solver : adam                                       | 0.726 | 0.728 |
| RF | SS       | SMOTE    | RF__class_weight : balanced; RF__criterion : log_loss;<br>RF__max_depth : 1; RF__max_features : 1;<br>RF__min_samples_leaf : 20; RF__n_estimators : 323;<br>RF__random_state : 0 | 0.725 | 0.738 |
| RF | SS       | SMOTE    | RF__class_weight : balanced_subsample;<br>RF__criterion : log_loss; RF__max_depth : 1;                                                                                           | 0.725 | 0.737 |

|    |          |          |                                                                                                                                                                                            |       |       |
|----|----------|----------|--------------------------------------------------------------------------------------------------------------------------------------------------------------------------------------------|-------|-------|
|    |          |          | RF__max_features : 1; RF__min_samples_leaf : 20;<br>RF__n_estimators : 364; RF__random_state : 0                                                                                           |       |       |
| RF | SS       | SMOTE    | RF__class_weight : None; RF__criterion : log_loss;<br>RF__max_depth : 1; RF__max_features : 1;<br>RF__min_samples_leaf : 6; RF__n_estimators : 300;<br>RF__random_state : 0                | 0.725 | 0.738 |
| RF | SS       | SMOTE    | RF__class_weight : balanced; RF__criterion : log_loss;<br>RF__max_depth : 1; RF__max_features : 1;<br>RF__min_samples_leaf : 6; RF__n_estimators : 431;<br>RF__random_state : 0            | 0.724 | 0.739 |
| NN | SS       | SMOTE    | NN__activation : logistic; NN__alpha :<br>0.005073082593486951; NN__hidden_layer_sizes : 3;<br>NN__max_iter : 201; NN__random_state : 0;<br>NN__solver : adam                              | 0.724 | 0.731 |
| RF | Not used | Not used | RF__class_weight : balanced_subsample;<br>RF__criterion : log_loss; RF__max_depth : 1;<br>RF__max_features : 1; RF__min_samples_leaf : 2;<br>RF__n_estimators : 655; RF__random_state : 43 | 0.723 | 0.754 |
| RF | Not used | Not used | RF__class_weight : None; RF__criterion : log_loss;<br>RF__max_depth : 1; RF__max_features : 1;<br>RF__min_samples_leaf : 1; RF__n_estimators : 300;<br>RF__random_state : 30               | 0.722 | 0.758 |
| RF | Not used | Not used | RF__class_weight : None; RF__criterion : log_loss;<br>RF__max_depth : 1; RF__max_features : 1;<br>RF__min_samples_leaf : 7; RF__n_estimators : 1000;<br>RF__random_state : 0               | 0.721 | 0.757 |
| RF | Not used | Not used | RF__class_weight : None; RF__criterion : log_loss;<br>RF__max_depth : 1; RF__max_features : 1;<br>RF__min_samples_leaf : 1; RF__n_estimators : 1000;<br>RF__random_state : 0               | 0.721 | 0.758 |



|    |          |          |                                                                                                                                                                                  |       |       |
|----|----------|----------|----------------------------------------------------------------------------------------------------------------------------------------------------------------------------------|-------|-------|
| RF | Not used | Not used | RF__class_weight : balanced; RF__criterion : log_loss;<br>RF__max_depth : 1; RF__max_features : 1;<br>RF__min_samples_leaf : 8; RF__n_estimators : 564;<br>RF__random_state : 0  | 0.720 | 0.754 |
| NN | MM       | ROS      | NN__activation : identity; NN__alpha :<br>0.001254961325650091; NN__hidden_layer_sizes : 6;<br>NN__max_iter : 500; NN__random_state : 0;<br>NN__solver : adam                    | 0.720 | 0.731 |
| RF | Not used | Not used | RF__class_weight : balanced; RF__criterion : log_loss;<br>RF__max_depth : 1; RF__max_features : 1;<br>RF__min_samples_leaf : 1; RF__n_estimators : 300;<br>RF__random_state : 35 | 0.720 | 0.756 |
| RF | Not used | Not used | RF__class_weight : balanced; RF__criterion : log_loss;<br>RF__max_depth : 1; RF__max_features : 1;<br>RF__min_samples_leaf : 7; RF__n_estimators : 300;<br>RF__random_state : 0  | 0.719 | 0.754 |
| RF | Not used | Not used | RF__class_weight : None; RF__criterion : log_loss;<br>RF__max_depth : 1; RF__max_features : 1;<br>RF__min_samples_leaf : 12; RF__n_estimators : 300;<br>RF__random_state : 0     | 0.719 | 0.749 |
| RF | SS       | ADASYN   | RF__class_weight : balanced; RF__criterion : log_loss;<br>RF__max_depth : 1; RF__max_features : 1;<br>RF__min_samples_leaf : 2; RF__n_estimators : 1000;<br>RF__random_state : 0 | 0.719 | 0.736 |
| RF | SS       | ADASYN   | RF__class_weight : None; RF__criterion : log_loss;<br>RF__max_depth : 1; RF__max_features : 1;<br>RF__min_samples_leaf : 3; RF__n_estimators : 1000;<br>RF__random_state : 0     | 0.719 | 0.736 |
| RF | Not used | Not used | RF__class_weight : None; RF__criterion : log_loss;<br>RF__max_depth : 1; RF__max_features : 1;                                                                                   | 0.718 | 0.759 |

|    |          |          |                                                                                                                                                                                 |       |       |
|----|----------|----------|---------------------------------------------------------------------------------------------------------------------------------------------------------------------------------|-------|-------|
|    |          |          | RF__min_samples_leaf : 4; RF__n_estimators : 1000;<br>RF__random_state : 0                                                                                                      |       |       |
| NN | SS       | ROS      | NN__activation : identity; NN__alpha : 10.0;<br>NN__hidden_layer_sizes : 3; NN__max_iter : 207;<br>NN__random_state : 0; NN__solver : adam                                      | 0.718 | 0.732 |
| NN | SS       | ROS      | NN__activation : identity; NN__alpha : 10.0;<br>NN__hidden_layer_sizes : 3; NN__max_iter : 197;<br>NN__random_state : 0; NN__solver : adam                                      | 0.718 | 0.732 |
| RF | SS       | ADASYN   | RF__class_weight : balanced; RF__criterion : log_loss;<br>RF__max_depth : 1; RF__max_features : 1;<br>RF__min_samples_leaf : 1; RF__n_estimators : 300;<br>RF__random_state : 0 | 0.718 | 0.735 |
| RF | MM       | ROS      | RF__class_weight : None; RF__criterion : log_loss;<br>RF__max_depth : 1; RF__max_features : 1;<br>RF__min_samples_leaf : 20; RF__n_estimators : 548;<br>RF__random_state : 0    | 0.718 | 0.752 |
| NN | SS       | ROS      | NN__activation : identity; NN__alpha : 10.0;<br>NN__hidden_layer_sizes : 3; NN__max_iter : 206;<br>NN__random_state : 0; NN__solver : adam                                      | 0.718 | 0.732 |
| NN | SS       | ROS      | NN__activation : identity; NN__alpha : 10.0;<br>NN__hidden_layer_sizes : 3; NN__max_iter : 205;<br>NN__random_state : 0; NN__solver : adam                                      | 0.717 | 0.732 |
| NN | SS       | ROS      | NN__activation : identity; NN__alpha : 10.0;<br>NN__hidden_layer_sizes : 3; NN__max_iter : 189;<br>NN__random_state : 0; NN__solver : adam                                      | 0.717 | 0.731 |
| NN | SS       | SMOTE    | NN__activation : logistic; NN__alpha : 0.0001;<br>NN__hidden_layer_sizes : 3; NN__max_iter : 245;<br>NN__random_state : 0; NN__solver : adam                                    | 0.717 | 0.733 |
| RF | Not used | Not used | RF__class_weight : balanced; RF__criterion : log_loss;<br>RF__max_depth : 1; RF__max_features : 1;                                                                              | 0.717 | 0.756 |

|    |    |        |                                                                                                                                                                                             |       |       |
|----|----|--------|---------------------------------------------------------------------------------------------------------------------------------------------------------------------------------------------|-------|-------|
|    |    |        | RF__min_samples_leaf : 6; RF__n_estimators : 1000;<br>RF__random_state : 0                                                                                                                  |       |       |
| NN | MM | ROS    | NN__activation : logistic; NN__alpha :<br>0.006324534487428441; NN__hidden_layer_sizes : 6;<br>NN__max_iter : 410; NN__random_state : 0;<br>NN__solver : adam                               | 0.717 | 0.726 |
| RF | MM | ROS    | RF__class_weight : balanced; RF__criterion : log_loss;<br>RF__max_depth : 1; RF__max_features : 1;<br>RF__min_samples_leaf : 20; RF__n_estimators : 1000;<br>RF__random_state : 0           | 0.716 | 0.753 |
| RF | SS | ROS    | RF__class_weight : None; RF__criterion : log_loss;<br>RF__max_depth : 1; RF__max_features : 1;<br>RF__min_samples_leaf : 20; RF__n_estimators : 1000;<br>RF__random_state : 0               | 0.716 | 0.753 |
| NN | SS | ADASYN | NN__activation : logistic; NN__alpha : 0.0001;<br>NN__hidden_layer_sizes : 50; NN__max_iter : 50;<br>NN__random_state : 0; NN__solver : adam                                                | 0.716 | 0.732 |
| NN | MM | ROS    | NN__activation : logistic; NN__alpha :<br>0.001413672972795645; NN__hidden_layer_sizes : 4;<br>NN__max_iter : 500; NN__random_state : 0;<br>NN__solver : adam                               | 0.716 | 0.725 |
| NN | SS | SMOTE  | NN__activation : logistic; NN__alpha : 10.0;<br>NN__hidden_layer_sizes : 3; NN__max_iter : 182;<br>NN__random_state : 0; NN__solver : adam                                                  | 0.716 | 0.726 |
| RF | MM | ROS    | RF__class_weight : balanced_subsample;<br>RF__criterion : log_loss; RF__max_depth : 1;<br>RF__max_features : 1; RF__min_samples_leaf : 20;<br>RF__n_estimators : 674; RF__random_state : 50 | 0.716 | 0.753 |
| RF | SS | ADASYN | RF__class_weight : balanced; RF__criterion : log_loss;<br>RF__max_depth : 1; RF__max_features : 1;                                                                                          | 0.715 | 0.740 |

|    |          |          |                                                                                                                                                                               |       |       |
|----|----------|----------|-------------------------------------------------------------------------------------------------------------------------------------------------------------------------------|-------|-------|
|    |          |          | RF__min_samples_leaf : 1; RF__n_estimators : 505;<br>RF__random_state : 19                                                                                                    |       |       |
| RF | SS       | SMOTE    | RF__class_weight : None; RF__criterion : log_loss;<br>RF__max_depth : 1; RF__max_features : 1;<br>RF__min_samples_leaf : 20; RF__n_estimators : 1000;<br>RF__random_state : 0 | 0.715 | 0.739 |
| NN | MM       | ROS      | NN__activation : logistic; NN__alpha : 0.0001;<br>NN__hidden_layer_sizes : 10; NN__max_iter : 500;<br>NN__random_state : 0; NN__solver : adam                                 | 0.715 | 0.726 |
| NN | MM       | ROS      | NN__activation : identity; NN__alpha :<br>0.00014302786666323548; NN__hidden_layer_sizes :<br>35; NN__max_iter : 50; NN__random_state : 0;<br>NN__solver : adam               | 0.715 | 0.728 |
| RF | MM       | ROS      | RF__class_weight : None; RF__criterion : log_loss;<br>RF__max_depth : 1; RF__max_features : 1;<br>RF__min_samples_leaf : 20; RF__n_estimators : 300;<br>RF__random_state : 0  | 0.715 | 0.754 |
| RF | SS       | ROS      | RF__class_weight : None; RF__criterion : log_loss;<br>RF__max_depth : 1; RF__max_features : 1;<br>RF__min_samples_leaf : 20; RF__n_estimators : 300;<br>RF__random_state : 0  | 0.715 | 0.754 |
| NN | SS       | ROS      | NN__activation : logistic; NN__alpha :<br>0.0009395218022160033; NN__hidden_layer_sizes : 3;<br>NN__max_iter : 462; NN__random_state : 0;<br>NN__solver : adam                | 0.714 | 0.736 |
| NN | MM       | ROS      | NN__activation : tanh; NN__alpha :<br>0.004469278831114033; NN__hidden_layer_sizes : 8;<br>NN__max_iter : 445; NN__random_state : 0;<br>NN__solver : adam                     | 0.714 | 0.732 |
| RF | Not used | Not used | RF__class_weight : balanced_subsample;<br>RF__criterion : log_loss; RF__max_depth : 1;                                                                                        | 0.714 | 0.757 |

|    |          |          |                                                                                                                                                                                  |       |       |
|----|----------|----------|----------------------------------------------------------------------------------------------------------------------------------------------------------------------------------|-------|-------|
|    |          |          | RF__max_features : 1; RF__min_samples_leaf : 6;<br>RF__n_estimators : 889; RF__random_state : 99                                                                                 |       |       |
| RF | SS       | SMOTE    | RF__class_weight : None; RF__criterion : log_loss;<br>RF__max_depth : 1; RF__max_features : 1;<br>RF__min_samples_leaf : 1; RF__n_estimators : 1000;<br>RF__random_state : 83    | 0.714 | 0.741 |
| NN | MM       | ROS      | NN__activation : logistic; NN__alpha :<br>0.0001000006070296437; NN__hidden_layer_sizes : 40;<br>NN__max_iter : 68; NN__random_state : 0;<br>NN__solver : adam                   | 0.714 | 0.722 |
| RF | MM       | SMOTE    | RF__class_weight : None; RF__criterion : log_loss;<br>RF__max_depth : 1; RF__max_features : 1;<br>RF__min_samples_leaf : 20; RF__n_estimators : 357;<br>RF__random_state : 0     | 0.714 | 0.739 |
| RF | Not used | Not used | RF__class_weight : None; RF__criterion : gini;<br>RF__max_depth : 1; RF__max_features : 1;<br>RF__min_samples_leaf : 8; RF__n_estimators : 1000;<br>RF__random_state : 0         | 0.714 | 0.755 |
| NN | SS       | ROS      | NN__activation : relu; NN__alpha : 10.0;<br>NN__hidden_layer_sizes : 3; NN__max_iter : 202;<br>NN__random_state : 0; NN__solver : adam                                           | 0.713 | 0.729 |
| RF | SS       | SMOTE    | RF__class_weight : balanced; RF__criterion : log_loss;<br>RF__max_depth : 1; RF__max_features : 1;<br>RF__min_samples_leaf : 1; RF__n_estimators : 1000;<br>RF__random_state : 0 | 0.713 | 0.739 |
| RF | MM       | SMOTE    | RF__class_weight : balanced; RF__criterion : log_loss;<br>RF__max_depth : 1; RF__max_features : 1;<br>RF__min_samples_leaf : 1; RF__n_estimators : 350;<br>RF__random_state : 0  | 0.713 | 0.739 |
| RF | MM       | ROS      | RF__class_weight : None; RF__criterion : log_loss;<br>RF__max_depth : 1; RF__max_features : 1;                                                                                   | 0.713 | 0.751 |

|    |          |          |                                                                                                                                                                                  |       |       |
|----|----------|----------|----------------------------------------------------------------------------------------------------------------------------------------------------------------------------------|-------|-------|
|    |          |          | RF__min_samples_leaf : 1; RF__n_estimators : 594;<br>RF__random_state : 0                                                                                                        |       |       |
| RF | MM       | ROS      | RF__class_weight : balanced; RF__criterion : log_loss;<br>RF__max_depth : 1; RF__max_features : 1;<br>RF__min_samples_leaf : 1; RF__n_estimators : 1000;<br>RF__random_state : 0 | 0.713 | 0.751 |
| RF | MM       | SMOTE    | RF__class_weight : None; RF__criterion : log_loss;<br>RF__max_depth : 1; RF__max_features : 1;<br>RF__min_samples_leaf : 20; RF__n_estimators : 359;<br>RF__random_state : 0     | 0.712 | 0.738 |
| NN | Not used | Not used | NN__activation : tanh; NN__alpha :<br>0.27998320381921143; NN__hidden_layer_sizes : 9;<br>NN__max_iter : 400; NN__random_state : 0;<br>NN__solver : adam                         | 0.712 | 0.755 |
| RF | MM       | SMOTE    | RF__class_weight : balanced; RF__criterion : log_loss;<br>RF__max_depth : 1; RF__max_features : 1;<br>RF__min_samples_leaf : 1; RF__n_estimators : 354;<br>RF__random_state : 0  | 0.712 | 0.739 |
| RF | MM       | SMOTE    | RF__class_weight : balanced; RF__criterion : log_loss;<br>RF__max_depth : 1; RF__max_features : 1;<br>RF__min_samples_leaf : 1; RF__n_estimators : 348;<br>RF__random_state : 0  | 0.712 | 0.739 |
| RF | SS       | ROS      | RF__class_weight : None; RF__criterion : log_loss;<br>RF__max_depth : 1; RF__max_features : 1;<br>RF__min_samples_leaf : 5; RF__n_estimators : 1000;<br>RF__random_state : 0     | 0.712 | 0.751 |
| NN | SS       | ROS      | NN__activation : logistic; NN__alpha :<br>0.46415318133211225; NN__hidden_layer_sizes : 3;<br>NN__max_iter : 500; NN__random_state : 0;<br>NN__solver : adam                     | 0.712 | 0.735 |

|    |          |          |                                                                                                                                                                                   |       |       |
|----|----------|----------|-----------------------------------------------------------------------------------------------------------------------------------------------------------------------------------|-------|-------|
| RF | Not used | Not used | RF__class_weight : None; RF__criterion : gini;<br>RF__max_depth : 1; RF__max_features : 1;<br>RF__min_samples_leaf : 20; RF__n_estimators : 300;<br>RF__random_state : 0          | 0.712 | 0.747 |
| RF | MM       | SMOTE    | RF__class_weight : None; RF__criterion : log_loss;<br>RF__max_depth : 1; RF__max_features : 1;<br>RF__min_samples_leaf : 20; RF__n_estimators : 363;<br>RF__random_state : 0      | 0.712 | 0.738 |
| RF | MM       | SMOTE    | RF__class_weight : balanced; RF__criterion : log_loss;<br>RF__max_depth : 1; RF__max_features : 1;<br>RF__min_samples_leaf : 1; RF__n_estimators : 355;<br>RF__random_state : 0   | 0.712 | 0.739 |
| RF | Not used | Not used | RF__class_weight : balanced; RF__criterion : gini;<br>RF__max_depth : 1; RF__max_features : 1;<br>RF__min_samples_leaf : 9; RF__n_estimators : 387;<br>RF__random_state : 0       | 0.712 | 0.755 |
| NN | MM       | ROS      | NN__activation : logistic; NN__alpha :<br>0.00018986178592672774; NN__hidden_layer_sizes :<br>40; NN__max_iter : 192; NN__random_state : 0;<br>NN__solver : adam                  | 0.712 | 0.726 |
| RF | SS       | ADASYN   | RF__class_weight : balanced; RF__criterion : log_loss;<br>RF__max_depth : 1; RF__max_features : 1;<br>RF__min_samples_leaf : 20; RF__n_estimators : 1000;<br>RF__random_state : 0 | 0.712 | 0.735 |
| RF | MM       | SMOTE    | RF__class_weight : balanced; RF__criterion : log_loss;<br>RF__max_depth : 1; RF__max_features : 1;<br>RF__min_samples_leaf : 1; RF__n_estimators : 344;<br>RF__random_state : 0   | 0.711 | 0.739 |
| RF | MM       | ROS      | RF__class_weight : balanced; RF__criterion : log_loss;<br>RF__max_depth : 1; RF__max_features : 1;                                                                                | 0.711 | 0.753 |

|    |          |          |                                                                                                                                                                                  |       |       |
|----|----------|----------|----------------------------------------------------------------------------------------------------------------------------------------------------------------------------------|-------|-------|
|    |          |          | RF__min_samples_leaf : 1; RF__n_estimators : 1000;<br>RF__random_state : 63                                                                                                      |       |       |
| RF | MM       | SMOTE    | RF__class_weight : balanced; RF__criterion : log_loss;<br>RF__max_depth : 1; RF__max_features : 1;<br>RF__min_samples_leaf : 20; RF__n_estimators : 358;<br>RF__random_state : 0 | 0.711 | 0.739 |
| RF | MM       | SMOTE    | RF__class_weight : None; RF__criterion : log_loss;<br>RF__max_depth : 1; RF__max_features : 1;<br>RF__min_samples_leaf : 20; RF__n_estimators : 365;<br>RF__random_state : 0     | 0.711 | 0.738 |
| RF | SS       | SMOTE    | RF__class_weight : None; RF__criterion : gini;<br>RF__max_depth : 1; RF__max_features : 1;<br>RF__min_samples_leaf : 20; RF__n_estimators : 300;<br>RF__random_state : 0         | 0.711 | 0.735 |
| RF | MM       | SMOTE    | RF__class_weight : balanced; RF__criterion : log_loss;<br>RF__max_depth : 1; RF__max_features : 1;<br>RF__min_samples_leaf : 1; RF__n_estimators : 360;<br>RF__random_state : 0  | 0.711 | 0.739 |
| NN | MM       | ADASYN   | NN__activation : logistic; NN__alpha :<br>0.029741017653186517; NN__hidden_layer_sizes : 50;<br>NN__max_iter : 50; NN__random_state : 0;<br>NN__solver : adam                    | 0.711 | 0.720 |
| NN | MM       | SMOTE    | NN__activation : identity; NN__alpha :<br>0.5732787316498061; NN__hidden_layer_sizes : 30;<br>NN__max_iter : 50; NN__random_state : 0;<br>NN__solver : adam                      | 0.711 | 0.725 |
| NN | Not used | Not used | NN__activation : identity; NN__alpha :<br>0.00012096723075925161; NN__hidden_layer_sizes :<br>50; NN__max_iter : 51; NN__random_state : 0;<br>NN__solver : lbfgs                 | 0.711 | 0.735 |



|    |          |          |                                                                                                                                                                                              |       |       |
|----|----------|----------|----------------------------------------------------------------------------------------------------------------------------------------------------------------------------------------------|-------|-------|
| RF | MM       | ROS      | RF__class_weight : balanced_subsample;<br>RF__criterion : log_loss; RF__max_depth : 1;<br>RF__max_features : 1; RF__min_samples_leaf : 10;<br>RF__n_estimators : 1000; RF__random_state : 30 | 0.711 | 0.755 |
| RF | MM       | SMOTE    | RF__class_weight : None; RF__criterion : log_loss;<br>RF__max_depth : 1; RF__max_features : 1;<br>RF__min_samples_leaf : 20; RF__n_estimators : 300;<br>RF__random_state : 0                 | 0.711 | 0.738 |
| RF | MM       | SMOTE    | RF__class_weight : None; RF__criterion : log_loss;<br>RF__max_depth : 1; RF__max_features : 1;<br>RF__min_samples_leaf : 20; RF__n_estimators : 368;<br>RF__random_state : 0                 | 0.711 | 0.738 |
| RF | MM       | SMOTE    | RF__class_weight : balanced; RF__criterion : log_loss;<br>RF__max_depth : 1; RF__max_features : 1;<br>RF__min_samples_leaf : 1; RF__n_estimators : 356;<br>RF__random_state : 0              | 0.711 | 0.739 |
| NN | MM       | ROS      | NN__activation : tanh; NN__alpha :<br>0.005403123829374884; NN__hidden_layer_sizes : 8;<br>NN__max_iter : 202; NN__random_state : 0;<br>NN__solver : adam                                    | 0.711 | 0.723 |
| NN | Not used | Not used | NN__activation : tanh; NN__alpha : 0.0001;<br>NN__hidden_layer_sizes : 30; NN__max_iter : 291;<br>NN__random_state : 0; NN__solver : adam                                                    | 0.711 | 0.758 |
| RF | Not used | Not used | RF__class_weight : balanced_subsample;<br>RF__criterion : log_loss; RF__max_depth : 1;<br>RF__max_features : 1; RF__min_samples_leaf : 4;<br>RF__n_estimators : 300; RF__random_state : 1    | 0.711 | 0.755 |
| RF | MM       | ROS      | RF__class_weight : balanced; RF__criterion : log_loss;<br>RF__max_depth : 1; RF__max_features : 1;<br>RF__min_samples_leaf : 1; RF__n_estimators : 300;<br>RF__random_state : 0              | 0.710 | 0.752 |

|    |          |          |                                                                                                                                                                                             |       |       |
|----|----------|----------|---------------------------------------------------------------------------------------------------------------------------------------------------------------------------------------------|-------|-------|
| RF | MM       | ROS      | RF__class_weight : balanced_subsample;<br>RF__criterion : log_loss; RF__max_depth : 1;<br>RF__max_features : 1; RF__min_samples_leaf : 2;<br>RF__n_estimators : 1000; RF__random_state : 32 | 0.710 | 0.754 |
| NN | Not used | Not used | NN__activation : identity; NN__alpha :<br>0.02322431597682465; NN__hidden_layer_sizes : 9;<br>NN__max_iter : 148; NN__random_state : 0;<br>NN__solver : lbfgs                               | 0.710 | 0.735 |
| NN | MM       | ROS      | NN__activation : tanh; NN__alpha : 0.0001;<br>NN__hidden_layer_sizes : 30; NN__max_iter : 50;<br>NN__random_state : 0; NN__solver : adam                                                    | 0.710 | 0.722 |
| NN | SS       | ROS      | NN__activation : identity; NN__alpha : 10.0;<br>NN__hidden_layer_sizes : 15; NN__max_iter : 202;<br>NN__random_state : 0; NN__solver : adam                                                 | 0.710 | 0.733 |
| NN | Not used | Not used | NN__activation : tanh; NN__alpha : 0.0001;<br>NN__hidden_layer_sizes : 30; NN__max_iter : 500;<br>NN__random_state : 0; NN__solver : adam                                                   | 0.710 | 0.769 |
| RF | MM       | ROS      | RF__class_weight : balanced; RF__criterion : log_loss;<br>RF__max_depth : 1; RF__max_features : 1;<br>RF__min_samples_leaf : 8; RF__n_estimators : 601;<br>RF__random_state : 59            | 0.710 | 0.754 |
| NN | MM       | ROS      | NN__activation : logistic; NN__alpha :<br>0.007090111341938081; NN__hidden_layer_sizes : 15;<br>NN__max_iter : 500; NN__random_state : 0;<br>NN__solver : adam                              | 0.710 | 0.723 |
| NN | Not used | Not used | NN__activation : identity; NN__alpha : 0.0001;<br>NN__hidden_layer_sizes : 24; NN__max_iter : 68;<br>NN__random_state : 0; NN__solver : lbfgs                                               | 0.710 | 0.735 |
| RF | Not used | Not used | RF__class_weight : None; RF__criterion : log_loss;<br>RF__max_depth : 2; RF__max_features : 1;                                                                                              | 0.710 | 0.774 |

|    |    |       |                                                                                                                                                                                             |       |       |
|----|----|-------|---------------------------------------------------------------------------------------------------------------------------------------------------------------------------------------------|-------|-------|
|    |    |       | RF__min_samples_leaf : 2; RF__n_estimators : 573;<br>RF__random_state : 3                                                                                                                   |       |       |
| RF | MM | ROS   | RF__class_weight : balanced; RF__criterion : log_loss;<br>RF__max_depth : 2; RF__max_features : 1;<br>RF__min_samples_leaf : 3; RF__n_estimators : 300;<br>RF__random_state : 0             | 0.710 | 0.769 |
| NN | MM | ROS   | NN__activation : logistic; NN__alpha : 0.0001;<br>NN__hidden_layer_sizes : 30; NN__max_iter : 500;<br>NN__random_state : 0; NN__solver : adam                                               | 0.710 | 0.728 |
| RF | SS | SMOTE | RF__class_weight : balanced_subsample;<br>RF__criterion : log_loss; RF__max_depth : 1;<br>RF__max_features : 1; RF__min_samples_leaf : 20;<br>RF__n_estimators : 953; RF__random_state : 65 | 0.710 | 0.738 |
| NN | SS | ROS   | NN__activation : identity; NN__alpha :<br>2.248094973114098; NN__hidden_layer_sizes : 3;<br>NN__max_iter : 196; NN__random_state : 0;<br>NN__solver : adam                                  | 0.710 | 0.732 |
| RF | MM | SMOTE | RF__class_weight : balanced; RF__criterion : log_loss;<br>RF__max_depth : 1; RF__max_features : 1;<br>RF__min_samples_leaf : 1; RF__n_estimators : 300;<br>RF__random_state : 0             | 0.710 | 0.739 |
| NN | SS | SMOTE | NN__activation : identity; NN__alpha :<br>0.0011726495223515266; NN__hidden_layer_sizes : 3;<br>NN__max_iter : 141; NN__random_state : 0;<br>NN__solver : adam                              | 0.710 | 0.724 |
| RF | SS | ROS   | RF__class_weight : balanced; RF__criterion : log_loss;<br>RF__max_depth : 1; RF__max_features : 1;<br>RF__min_samples_leaf : 1; RF__n_estimators : 612;<br>RF__random_state : 2             | 0.710 | 0.755 |

|    |          |          |                                                                                                                                                                                              |       |       |
|----|----------|----------|----------------------------------------------------------------------------------------------------------------------------------------------------------------------------------------------|-------|-------|
| NN | SS       | ROS      | NN__activation : identity; NN__alpha : 10.0;<br>NN__hidden_layer_sizes : 3; NN__max_iter : 279;<br>NN__random_state : 0; NN__solver : adam                                                   | 0.710 | 0.733 |
| NN | Not used | Not used | NN__activation : identity; NN__alpha : 0.0001;<br>NN__hidden_layer_sizes : 40; NN__max_iter : 270;<br>NN__random_state : 0; NN__solver : lbfgs                                               | 0.710 | 0.735 |
| NN | Not used | Not used | NN__activation : identity; NN__alpha :<br>0.04103700584134806; NN__hidden_layer_sizes : 4;<br>NN__max_iter : 500; NN__random_state : 0;<br>NN__solver : lbfgs                                | 0.710 | 0.735 |
| NN | SS       | SMOTE    | NN__activation : identity; NN__alpha : 10.0;<br>NN__hidden_layer_sizes : 3; NN__max_iter : 232;<br>NN__random_state : 0; NN__solver : adam                                                   | 0.710 | 0.732 |
| RF | MM       | ROS      | RF__class_weight : balanced; RF__criterion : log_loss;<br>RF__max_depth : 2; RF__max_features : 1;<br>RF__min_samples_leaf : 1; RF__n_estimators : 888;<br>RF__random_state : 43             | 0.710 | 0.770 |
| RF | SS       | SMOTE    | RF__class_weight : balanced_subsample;<br>RF__criterion : log_loss; RF__max_depth : 1;<br>RF__max_features : 1; RF__min_samples_leaf : 20;<br>RF__n_estimators : 1000; RF__random_state : 75 | 0.710 | 0.739 |
| RF | MM       | SMOTE    | RF__class_weight : balanced; RF__criterion : log_loss;<br>RF__max_depth : 1; RF__max_features : 1;<br>RF__min_samples_leaf : 20; RF__n_estimators : 364;<br>RF__random_state : 0             | 0.709 | 0.738 |
| NN | Not used | Not used | NN__activation : tanh; NN__alpha :<br>0.25314925275071964; NN__hidden_layer_sizes : 9;<br>NN__max_iter : 374; NN__random_state : 0;<br>NN__solver : adam                                     | 0.709 | 0.754 |
| NN | MM       | SMOTE    | NN__activation : identity; NN__alpha :<br>0.2698616513598057; NN__hidden_layer_sizes : 30;                                                                                                   | 0.709 | 0.725 |

|    |          |          |                                                                                                                                                                  |       |       |
|----|----------|----------|------------------------------------------------------------------------------------------------------------------------------------------------------------------|-------|-------|
|    |          |          | NN__max_iter : 50; NN__random_state : 0;<br>NN__solver : adam                                                                                                    |       |       |
| NN | Not used | Not used | NN__activation : identity; NN__alpha :<br>0.0005010365707035275; NN__hidden_layer_sizes : 35;<br>NN__max_iter : 124; NN__random_state : 0;<br>NN__solver : lbfgs | 0.709 | 0.735 |
| NN | Not used | Not used | NN__activation : identity; NN__alpha :<br>0.0003253151456288895; NN__hidden_layer_sizes : 10;<br>NN__max_iter : 53; NN__random_state : 0;<br>NN__solver : lbfgs  | 0.709 | 0.734 |
| NN | MM       | ROS      | NN__activation : logistic; NN__alpha :<br>0.43513970791520495; NN__hidden_layer_sizes : 40;<br>NN__max_iter : 192; NN__random_state : 0;<br>NN__solver : adam    | 0.709 | 0.723 |
| NN | MM       | ROS      | NN__activation : identity; NN__alpha :<br>1.2278635248432284; NN__hidden_layer_sizes : 27;<br>NN__max_iter : 165; NN__random_state : 0;<br>NN__solver : adam     | 0.709 | 0.729 |
| NN | SS       | SMOTE    | NN__activation : identity; NN__alpha :<br>0.00043653486872989914; NN__hidden_layer_sizes : 3;<br>NN__max_iter : 140; NN__random_state : 0;<br>NN__solver : adam  | 0.709 | 0.724 |
| NN | Not used | Not used | NN__activation : identity; NN__alpha : 0.0001;<br>NN__hidden_layer_sizes : 8; NN__max_iter : 500;<br>NN__random_state : 0; NN__solver : lbfgs                    | 0.709 | 0.735 |
| NN | SS       | ROS      | NN__activation : identity; NN__alpha : 10.0;<br>NN__hidden_layer_sizes : 3; NN__max_iter : 435;<br>NN__random_state : 0; NN__solver : adam                       | 0.709 | 0.733 |
| NN | MM       | SMOTE    | NN__activation : logistic; NN__alpha :<br>0.7392993308744839; NN__hidden_layer_sizes : 50;                                                                       | 0.709 | 0.717 |

|    |          |          |                                                                                                                                                                              |       |       |
|----|----------|----------|------------------------------------------------------------------------------------------------------------------------------------------------------------------------------|-------|-------|
|    |          |          | NN__max_iter : 50; NN__random_state : 0;<br>NN__solver : adam                                                                                                                |       |       |
| NN | MM       | ROS      | NN__activation : tanh; NN__alpha :<br>2.6096146808538574; NN__hidden_layer_sizes : 8;<br>NN__max_iter : 478; NN__random_state : 0;<br>NN__solver : adam                      | 0.709 | 0.727 |
| NN | Not used | Not used | NN__activation : identity; NN__alpha : 0.0001;<br>NN__hidden_layer_sizes : 40; NN__max_iter : 50;<br>NN__random_state : 0; NN__solver : lbfgs                                | 0.709 | 0.735 |
| NN | Not used | Not used | NN__activation : identity; NN__alpha :<br>0.00011286464023056555; NN__hidden_layer_sizes :<br>50; NN__max_iter : 500; NN__random_state : 0;<br>NN__solver : lbfgs            | 0.709 | 0.735 |
| RF | SS       | ROS      | RF__class_weight : balanced; RF__criterion : gini;<br>RF__max_depth : 1; RF__max_features : 1;<br>RF__min_samples_leaf : 20; RF__n_estimators : 300;<br>RF__random_state : 0 | 0.708 | 0.754 |
| NN | SS       | ROS      | NN__activation : relu; NN__alpha : 10.0;<br>NN__hidden_layer_sizes : 3; NN__max_iter : 467;<br>NN__random_state : 0; NN__solver : adam                                       | 0.708 | 0.732 |
| NN | Not used | Not used | NN__activation : identity; NN__alpha :<br>0.01953721425874314; NN__hidden_layer_sizes : 4;<br>NN__max_iter : 465; NN__random_state : 0;<br>NN__solver : lbfgs                | 0.708 | 0.735 |
| NN | MM       | ROS      | NN__activation : logistic; NN__alpha :<br>0.0746220651193357; NN__hidden_layer_sizes : 20;<br>NN__max_iter : 183; NN__random_state : 0;<br>NN__solver : adam                 | 0.708 | 0.720 |
| NN | MM       | SMOTE    | NN__activation : tanh; NN__alpha :<br>6.603270381036594; NN__hidden_layer_sizes : 3;                                                                                         | 0.708 | 0.718 |

|     |          |          |                                                                                                                                                                                                                                    |       |       |
|-----|----------|----------|------------------------------------------------------------------------------------------------------------------------------------------------------------------------------------------------------------------------------------|-------|-------|
|     |          |          | NN__max_iter : 489; NN__random_state : 0;<br>NN__solver : adam                                                                                                                                                                     |       |       |
| NN  | Not used | Not used | NN__activation : tanh; NN__alpha :<br>0.014240291413468184; NN__hidden_layer_sizes : 9;<br>NN__max_iter : 447; NN__random_state : 0;<br>NN__solver : adam                                                                          | 0.708 | 0.756 |
| XGB | Not used | Not used | XGB__alpha : 7.9949791346095544;<br>XGB__colsample_bytree : 1.0; XGB__gamma : 0.1;<br>XGB__max_depth : 3; XGB__min_child_weight : 0.0;<br>XGB__random_state : 0; XGB__scale_pos_weight : 2.0;<br>XGB__subsample : 0.5              | 0.708 | 0.816 |
| NN  | MM       | ROS      | NN__activation : identity; NN__alpha : 0.0001;<br>NN__hidden_layer_sizes : 8; NN__max_iter : 500;<br>NN__random_state : 0; NN__solver : adam                                                                                       | 0.708 | 0.728 |
| XGB | Not used | Not used | XGB__alpha : 7.216063149618247;<br>XGB__colsample_bytree : 1.0; XGB__gamma : 0.1;<br>XGB__max_depth : 3; XGB__min_child_weight : 0.0;<br>XGB__random_state : 0; XGB__scale_pos_weight :<br>1.531918949951429; XGB__subsample : 0.5 | 0.708 | 0.802 |
| NN  | MM       | SMOTE    | NN__activation : identity; NN__alpha :<br>0.8460012669587524; NN__hidden_layer_sizes : 35;<br>NN__max_iter : 50; NN__random_state : 0;<br>NN__solver : adam                                                                        | 0.708 | 0.724 |
| NN  | Not used | Not used | NN__activation : tanh; NN__alpha :<br>4.1023173071789145; NN__hidden_layer_sizes : 3;<br>NN__max_iter : 325; NN__random_state : 0;<br>NN__solver : adam                                                                            | 0.708 | 0.731 |
| NN  | MM       | ROS      | NN__activation : identity; NN__alpha : 10.0;<br>NN__hidden_layer_sizes : 8; NN__max_iter : 500;<br>NN__random_state : 0; NN__solver : adam                                                                                         | 0.708 | 0.716 |

|    |          |          |                                                                                                                                                                      |       |       |
|----|----------|----------|----------------------------------------------------------------------------------------------------------------------------------------------------------------------|-------|-------|
| NN | MM       | ADASYN   | NN__activation : identity; NN__alpha : 0.8903812307853785; NN__hidden_layer_sizes : 7; NN__max_iter : 500; NN__random_state : 0; NN__solver : adam                   | 0.708 | 0.730 |
| RF | MM       | ROS      | RF__class_weight : None; RF__criterion : log_loss; RF__max_depth : 1; RF__max_features : 1; RF__min_samples_leaf : 20; RF__n_estimators : 419; RF__random_state : 34 | 0.708 | 0.754 |
| NN | SS       | SMOTE    | NN__activation : identity; NN__alpha : 0.0017196598039130406; NN__hidden_layer_sizes : 3; NN__max_iter : 139; NN__random_state : 0; NN__solver : adam                | 0.708 | 0.724 |
| NN | MM       | SMOTE    | NN__activation : relu; NN__alpha : 10.0; NN__hidden_layer_sizes : 50; NN__max_iter : 302; NN__random_state : 0; NN__solver : adam                                    | 0.708 | 0.716 |
| NN | SS       | SMOTE    | NN__activation : identity; NN__alpha : 0.0001; NN__hidden_layer_sizes : 3; NN__max_iter : 135; NN__random_state : 0; NN__solver : adam                               | 0.708 | 0.723 |
| NN | MM       | SMOTE    | NN__activation : tanh; NN__alpha : 10.0; NN__hidden_layer_sizes : 50; NN__max_iter : 124; NN__random_state : 0; NN__solver : adam                                    | 0.708 | 0.718 |
| NN | Not used | Not used | NN__activation : identity; NN__alpha : 0.03792262732844632; NN__hidden_layer_sizes : 4; NN__max_iter : 443; NN__random_state : 0; NN__solver : lbfgs                 | 0.708 | 0.735 |
| NN | SS       | ROS      | NN__activation : identity; NN__alpha : 0.0001; NN__hidden_layer_sizes : 3; NN__max_iter : 437; NN__random_state : 0; NN__solver : adam                               | 0.708 | 0.733 |
| NN | SS       | SMOTE    | NN__activation : identity; NN__alpha : 10.0; NN__hidden_layer_sizes : 3; NN__max_iter : 242; NN__random_state : 0; NN__solver : adam                                 | 0.708 | 0.732 |



|    |          |          |                                                                                                                                                                         |       |       |
|----|----------|----------|-------------------------------------------------------------------------------------------------------------------------------------------------------------------------|-------|-------|
| NN | MM       | SMOTE    | NN__activation : identity; NN__alpha : 4.446755998289332; NN__hidden_layer_sizes : 50; NN__max_iter : 50; NN__random_state : 0; NN__solver : adam                       | 0.708 | 0.715 |
| NN | SS       | ROS      | NN__activation : identity; NN__alpha : 10.0; NN__hidden_layer_sizes : 4; NN__max_iter : 500; NN__random_state : 0; NN__solver : adam                                    | 0.708 | 0.733 |
| NN | MM       | ADASYN   | NN__activation : tanh; NN__alpha : 2.6096146808538574; NN__hidden_layer_sizes : 8; NN__max_iter : 478; NN__random_state : 0; NN__solver : adam                          | 0.708 | 0.728 |
| RF | Not used | Not used | RF__class_weight : balanced; RF__criterion : log_loss; RF__max_depth : 2; RF__max_features : 1; RF__min_samples_leaf : 10; RF__n_estimators : 300; RF__random_state : 0 | 0.707 | 0.766 |
| NN | SS       | SMOTE    | NN__activation : identity; NN__alpha : 0.00022236231662955448; NN__hidden_layer_sizes : 3; NN__max_iter : 138; NN__random_state : 0; NN__solver : adam                  | 0.707 | 0.723 |
| NN | SS       | ROS      | NN__activation : identity; NN__alpha : 0.2915359171992179; NN__hidden_layer_sizes : 3; NN__max_iter : 203; NN__random_state : 0; NN__solver : adam                      | 0.707 | 0.733 |
| NN | SS       | SMOTE    | NN__activation : identity; NN__alpha : 0.0001; NN__hidden_layer_sizes : 3; NN__max_iter : 134; NN__random_state : 0; NN__solver : adam                                  | 0.707 | 0.723 |
| NN | MM       | ROS      | NN__activation : tanh; NN__alpha : 0.0001; NN__hidden_layer_sizes : 50; NN__max_iter : 50; NN__random_state : 0; NN__solver : adam                                      | 0.707 | 0.722 |
| NN | Not used | Not used | NN__activation : identity; NN__alpha : 0.4938436618748837; NN__hidden_layer_sizes : 3;                                                                                  | 0.707 | 0.735 |

|    |          |          |                                                                                                                                                                               |       |       |
|----|----------|----------|-------------------------------------------------------------------------------------------------------------------------------------------------------------------------------|-------|-------|
|    |          |          | NN__max_iter : 414; NN__random_state : 0;<br>NN__solver : lbfgs                                                                                                               |       |       |
| NN | Not used | Not used | NN__activation : identity; NN__alpha :<br>0.32676223258968823; NN__hidden_layer_sizes : 3;<br>NN__max_iter : 184; NN__random_state : 0;<br>NN__solver : lbfgs                 | 0.707 | 0.735 |
| NN | SS       | ROS      | NN__activation : identity; NN__alpha :<br>0.6175001932496609; NN__hidden_layer_sizes : 3;<br>NN__max_iter : 500; NN__random_state : 0;<br>NN__solver : adam                   | 0.707 | 0.733 |
| NN | MM       | ROS      | NN__activation : identity; NN__alpha :<br>0.2644589949352923; NN__hidden_layer_sizes : 50;<br>NN__max_iter : 50; NN__random_state : 0;<br>NN__solver : adam                   | 0.707 | 0.722 |
| NN | MM       | SMOTE    | NN__activation : tanh; NN__alpha :<br>2.6096146808538574; NN__hidden_layer_sizes : 8;<br>NN__max_iter : 478; NN__random_state : 0;<br>NN__solver : adam                       | 0.707 | 0.727 |
| RF | SS       | SMOTE    | RF__class_weight : None; RF__criterion : gini;<br>RF__max_depth : 1; RF__max_features : 1;<br>RF__min_samples_leaf : 1; RF__n_estimators : 526;<br>RF__random_state : 81      | 0.707 | 0.737 |
| NN | MM       | ROS      | NN__activation : identity; NN__alpha :<br>0.008603525977298382; NN__hidden_layer_sizes : 7;<br>NN__max_iter : 500; NN__random_state : 0;<br>NN__solver : adam                 | 0.707 | 0.730 |
| RF | Not used | Not used | RF__class_weight : None; RF__criterion : log_loss;<br>RF__max_depth : 1; RF__max_features : 1;<br>RF__min_samples_leaf : 20; RF__n_estimators : 1000;<br>RF__random_state : 0 | 0.707 | 0.749 |

|    |          |          |                                                                                                                                                                                    |       |       |
|----|----------|----------|------------------------------------------------------------------------------------------------------------------------------------------------------------------------------------|-------|-------|
| RF | Not used | Not used | RF__class_weight : None; RF__criterion : gini;<br>RF__max_depth : 1; RF__max_features : 1;<br>RF__min_samples_leaf : 2; RF__n_estimators : 1000;<br>RF__random_state : 0           | 0.707 | 0.754 |
| RF | SS       | ADASYN   | RF__class_weight : balanced; RF__criterion : log_loss;<br>RF__max_depth : 1; RF__max_features : 1;<br>RF__min_samples_leaf : 17; RF__n_estimators : 602;<br>RF__random_state : 31  | 0.707 | 0.737 |
| RF | SS       | ROS      | RF__class_weight : balanced; RF__criterion : log_loss;<br>RF__max_depth : 1; RF__max_features : 1;<br>RF__min_samples_leaf : 20; RF__n_estimators : 1000;<br>RF__random_state : 29 | 0.707 | 0.754 |
| RF | SS       | SMOTE    | RF__class_weight : None; RF__criterion : log_loss;<br>RF__max_depth : 1; RF__max_features : 1;<br>RF__min_samples_leaf : 12; RF__n_estimators : 997;<br>RF__random_state : 47      | 0.707 | 0.740 |
| NN | MM       | ADASYN   | NN__activation : tanh; NN__alpha :<br>0.0023278258548970043; NN__hidden_layer_sizes : 50;<br>NN__max_iter : 50; NN__random_state : 0;<br>NN__solver : adam                         | 0.707 | 0.722 |
| NN | MM       | SMOTE    | NN__activation : relu; NN__alpha : 10.0;<br>NN__hidden_layer_sizes : 50; NN__max_iter : 144;<br>NN__random_state : 0; NN__solver : adam                                            | 0.707 | 0.717 |
| NN | Not used | Not used | NN__activation : identity; NN__alpha :<br>1.0433147962664788; NN__hidden_layer_sizes : 35;<br>NN__max_iter : 478; NN__random_state : 0;<br>NN__solver : lbfgs                      | 0.707 | 0.735 |
| NN | SS       | SMOTE    | NN__activation : identity; NN__alpha : 0.0001;<br>NN__hidden_layer_sizes : 3; NN__max_iter : 157;<br>NN__random_state : 0; NN__solver : adam                                       | 0.707 | 0.728 |

|     |          |          |                                                                                                                                                                                             |       |       |
|-----|----------|----------|---------------------------------------------------------------------------------------------------------------------------------------------------------------------------------------------|-------|-------|
| RF  | MM       | ROS      | RF__class_weight : None; RF__criterion : gini;<br>RF__max_depth : 1; RF__max_features : 1;<br>RF__min_samples_leaf : 2; RF__n_estimators : 300;<br>RF__random_state : 0                     | 0.707 | 0.755 |
| RF  | SS       | ROS      | RF__class_weight : balanced; RF__criterion : gini;<br>RF__max_depth : 1; RF__max_features : 1;<br>RF__min_samples_leaf : 9; RF__n_estimators : 300;<br>RF__random_state : 0                 | 0.707 | 0.755 |
| NN  | MM       | SMOTE    | NN__activation : tanh; NN__alpha : 10.0;<br>NN__hidden_layer_sizes : 3; NN__max_iter : 500;<br>NN__random_state : 0; NN__solver : adam                                                      | 0.707 | 0.713 |
| RF  | SS       | SMOTE    | RF__class_weight : balanced; RF__criterion : gini;<br>RF__max_depth : 1; RF__max_features : 1;<br>RF__min_samples_leaf : 20; RF__n_estimators : 300;<br>RF__random_state : 63               | 0.707 | 0.735 |
| RF  | MM       | SMOTE    | RF__class_weight : balanced_subsample;<br>RF__criterion : log_loss; RF__max_depth : 1;<br>RF__max_features : 1; RF__min_samples_leaf : 20;<br>RF__n_estimators : 347; RF__random_state : 86 | 0.707 | 0.740 |
| NN  | MM       | ADASYN   | NN__activation : tanh; NN__alpha : 10.0;<br>NN__hidden_layer_sizes : 8; NN__max_iter : 392;<br>NN__random_state : 0; NN__solver : adam                                                      | 0.706 | 0.715 |
| NN  | Not used | Not used | NN__activation : identity; NN__alpha : 0.0001;<br>NN__hidden_layer_sizes : 27; NN__max_iter : 50;<br>NN__random_state : 0; NN__solver : lbfgs                                               | 0.706 | 0.735 |
| NN  | MM       | ROS      | NN__activation : identity; NN__alpha :<br>0.0011418420214747349; NN__hidden_layer_sizes : 50;<br>NN__max_iter : 147; NN__random_state : 0;<br>NN__solver : adam                             | 0.706 | 0.732 |
| XGB | Not used | Not used | XGB__alpha : 7.166397157050396;<br>XGB__colsample_bytree : 1.0; XGB__gamma : 0.1;                                                                                                           | 0.706 | 0.809 |

|     |          |          |                                                                                                                                                                                                                                     |       |       |
|-----|----------|----------|-------------------------------------------------------------------------------------------------------------------------------------------------------------------------------------------------------------------------------------|-------|-------|
|     |          |          | XGB__max_depth : 3; XGB__min_child_weight : 0.0;<br>XGB__random_state : 0; XGB__scale_pos_weight :<br>1.6024735100883754; XGB__subsample :<br>0.5121135299157635                                                                    |       |       |
| RF  | MM       | ROS      | RF__class_weight : balanced_subsample;<br>RF__criterion : log_loss; RF__max_depth : 1;<br>RF__max_features : 1; RF__min_samples_leaf : 3;<br>RF__n_estimators : 974; RF__random_state : 95                                          | 0.706 | 0.757 |
| NN  | MM       | ADASYN   | NN__activation : identity; NN__alpha : 0.0001;<br>NN__hidden_layer_sizes : 50; NN__max_iter : 50;<br>NN__random_state : 0; NN__solver : adam                                                                                        | 0.706 | 0.721 |
| XGB | Not used | Not used | XGB__alpha : 9.371570362967208;<br>XGB__colsample_bytree : 1.0; XGB__gamma : 0.1;<br>XGB__max_depth : 3; XGB__min_child_weight : 0.0;<br>XGB__random_state : 0; XGB__scale_pos_weight : 2.0;<br>XGB__subsample : 0.6396824807776188 | 0.706 | 0.800 |
| NN  | MM       | SMOTE    | NN__activation : tanh; NN__alpha : 10.0;<br>NN__hidden_layer_sizes : 50; NN__max_iter : 359;<br>NN__random_state : 0; NN__solver : adam                                                                                             | 0.706 | 0.716 |
| RF  | SS       | SMOTE    | RF__class_weight : None; RF__criterion : gini;<br>RF__max_depth : 1; RF__max_features : 1;<br>RF__min_samples_leaf : 20; RF__n_estimators : 637;<br>RF__random_state : 64                                                           | 0.706 | 0.736 |
| NN  | Not used | Not used | NN__activation : identity; NN__alpha :<br>0.7973871592855735; NN__hidden_layer_sizes : 35;<br>NN__max_iter : 270; NN__random_state : 0;<br>NN__solver : lbfgs                                                                       | 0.706 | 0.735 |
| NN  | SS       | SMOTE    | NN__activation : identity; NN__alpha : 10.0;<br>NN__hidden_layer_sizes : 3; NN__max_iter : 258;<br>NN__random_state : 0; NN__solver : adam                                                                                          | 0.706 | 0.732 |

|    |    |        |                                                                                                                                                                                   |       |       |
|----|----|--------|-----------------------------------------------------------------------------------------------------------------------------------------------------------------------------------|-------|-------|
| NN | MM | SMOTE  | NN__activation : identity; NN__alpha : 0.6841591798153179; NN__hidden_layer_sizes : 3; NN__max_iter : 500; NN__random_state : 0; NN__solver : adam                                | 0.706 | 0.723 |
| NN | MM | SMOTE  | NN__activation : identity; NN__alpha : 0.1883823891017267; NN__hidden_layer_sizes : 35; NN__max_iter : 50; NN__random_state : 0; NN__solver : adam                                | 0.706 | 0.725 |
| NN | MM | ROS    | NN__activation : identity; NN__alpha : 0.0001; NN__hidden_layer_sizes : 35; NN__max_iter : 500; NN__random_state : 0; NN__solver : adam                                           | 0.706 | 0.733 |
| NN | SS | ROS    | NN__activation : logistic; NN__alpha : 1.6800063358888258; NN__hidden_layer_sizes : 50; NN__max_iter : 500; NN__random_state : 0; NN__solver : adam                               | 0.706 | 0.734 |
| RF | SS | ROS    | RF__class_weight : balanced_subsample; RF__criterion : log_loss; RF__max_depth : 2; RF__max_features : 1; RF__min_samples_leaf : 1; RF__n_estimators : 390; RF__random_state : 96 | 0.706 | 0.771 |
| RF | MM | SMOTE  | RF__class_weight : None; RF__criterion : log_loss; RF__max_depth : 1; RF__max_features : 1; RF__min_samples_leaf : 20; RF__n_estimators : 626; RF__random_state : 0               | 0.706 | 0.738 |
| NN | SS | ROS    | NN__activation : identity; NN__alpha : 10.0; NN__hidden_layer_sizes : 50; NN__max_iter : 236; NN__random_state : 0; NN__solver : lbfgs                                            | 0.706 | 0.734 |
| RF | MM | ADASYN | RF__class_weight : None; RF__criterion : log_loss; RF__max_depth : 1; RF__max_features : 1; RF__min_samples_leaf : 1; RF__n_estimators : 412; RF__random_state : 0                | 0.706 | 0.735 |

|    |    |       |                                                                                                                                                                                           |       |       |
|----|----|-------|-------------------------------------------------------------------------------------------------------------------------------------------------------------------------------------------|-------|-------|
| NN | MM | ROS   | NN__activation : tanh; NN__alpha :<br>0.20237980080690054; NN__hidden_layer_sizes : 24;<br>NN__max_iter : 53; NN__random_state : 0;<br>NN__solver : adam                                  | 0.706 | 0.718 |
| NN | SS | ROS   | NN__activation : logistic; NN__alpha :<br>0.43513970791520495; NN__hidden_layer_sizes : 40;<br>NN__max_iter : 192; NN__random_state : 0;<br>NN__solver : adam                             | 0.706 | 0.734 |
| RF | SS | ROS   | RF__class_weight : balanced_subsample;<br>RF__criterion : log_loss; RF__max_depth : 2;<br>RF__max_features : 1; RF__min_samples_leaf : 1;<br>RF__n_estimators : 744; RF__random_state : 2 | 0.706 | 0.770 |
| NN | MM | SMOTE | NN__activation : logistic; NN__alpha :<br>0.43513970791520495; NN__hidden_layer_sizes : 40;<br>NN__max_iter : 192; NN__random_state : 0;<br>NN__solver : adam                             | 0.706 | 0.721 |
| NN | SS | SMOTE | NN__activation : identity; NN__alpha :<br>0.0026839782809033263; NN__hidden_layer_sizes : 3;<br>NN__max_iter : 173; NN__random_state : 0;<br>NN__solver : adam                            | 0.705 | 0.730 |
| NN | MM | SMOTE | NN__activation : identity; NN__alpha : 10.0;<br>NN__hidden_layer_sizes : 50; NN__max_iter : 149;<br>NN__random_state : 0; NN__solver : adam                                               | 0.705 | 0.718 |
| NN | SS | ROS   | NN__activation : identity; NN__alpha : 10.0;<br>NN__hidden_layer_sizes : 3; NN__max_iter : 123;<br>NN__random_state : 0; NN__solver : lbfgs                                               | 0.705 | 0.734 |
| NN | MM | ROS   | NN__activation : identity; NN__alpha :<br>0.016538821315471873; NN__hidden_layer_sizes : 50;<br>NN__max_iter : 50; NN__random_state : 0;<br>NN__solver : adam                             | 0.705 | 0.722 |

|    |    |        |                                                                                                                                                                                            |       |       |
|----|----|--------|--------------------------------------------------------------------------------------------------------------------------------------------------------------------------------------------|-------|-------|
| RF | MM | ADASYN | RF__class_weight : None; RF__criterion : log_loss;<br>RF__max_depth : 1; RF__max_features : 1;<br>RF__min_samples_leaf : 1; RF__n_estimators : 401;<br>RF__random_state : 0                | 0.705 | 0.735 |
| NN | MM | ADASYN | NN__activation : identity; NN__alpha : 0.0001;<br>NN__hidden_layer_sizes : 40; NN__max_iter : 50;<br>NN__random_state : 0; NN__solver : adam                                               | 0.705 | 0.723 |
| NN | MM | ROS    | NN__activation : identity; NN__alpha : 0.0001;<br>NN__hidden_layer_sizes : 27; NN__max_iter : 268;<br>NN__random_state : 0; NN__solver : adam                                              | 0.705 | 0.732 |
| RF | MM | ROS    | RF__class_weight : None; RF__criterion : log_loss;<br>RF__max_depth : 2; RF__max_features : 1;<br>RF__min_samples_leaf : 20; RF__n_estimators : 300;<br>RF__random_state : 0               | 0.705 | 0.767 |
| RF | SS | ROS    | RF__class_weight : None; RF__criterion : log_loss;<br>RF__max_depth : 2; RF__max_features : 1;<br>RF__min_samples_leaf : 20; RF__n_estimators : 300;<br>RF__random_state : 0               | 0.705 | 0.767 |
| NN | MM | SMOTE  | NN__activation : tanh; NN__alpha :<br>0.0011892310453067918; NN__hidden_layer_sizes : 50;<br>NN__max_iter : 50; NN__random_state : 0;<br>NN__solver : adam                                 | 0.705 | 0.721 |
| RF | MM | ROS    | RF__class_weight : balanced_subsample;<br>RF__criterion : log_loss; RF__max_depth : 2;<br>RF__max_features : 1; RF__min_samples_leaf : 7;<br>RF__n_estimators : 890; RF__random_state : 16 | 0.705 | 0.771 |
| RF | MM | ROS    | RF__class_weight : balanced; RF__criterion : gini;<br>RF__max_depth : 1; RF__max_features : 1;<br>RF__min_samples_leaf : 6; RF__n_estimators : 1000;<br>RF__random_state : 0               | 0.705 | 0.754 |



|    |          |          |                                                                                                                                                                                   |       |       |
|----|----------|----------|-----------------------------------------------------------------------------------------------------------------------------------------------------------------------------------|-------|-------|
| RF | Not used | Not used | RF__class_weight : None; RF__criterion : log_loss;<br>RF__max_depth : 1; RF__max_features : 1;<br>RF__min_samples_leaf : 2; RF__n_estimators : 1000;<br>RF__random_state : 100    | 0.705 | 0.757 |
| RF | SS       | ROS      | RF__class_weight : balanced; RF__criterion : log_loss;<br>RF__max_depth : 2; RF__max_features : 1;<br>RF__min_samples_leaf : 17; RF__n_estimators : 380;<br>RF__random_state : 53 | 0.705 | 0.766 |
| NN | MM       | SMOTE    | NN__activation : tanh; NN__alpha : 0.0001;<br>NN__hidden_layer_sizes : 50; NN__max_iter : 50;<br>NN__random_state : 0; NN__solver : adam                                          | 0.705 | 0.721 |
| NN | MM       | SMOTE    | NN__activation : identity; NN__alpha :<br>0.021376539749443257; NN__hidden_layer_sizes : 50;<br>NN__max_iter : 50; NN__random_state : 0;<br>NN__solver : adam                     | 0.705 | 0.720 |
| NN | SS       | SMOTE    | NN__activation : identity; NN__alpha : 0.0001;<br>NN__hidden_layer_sizes : 3; NN__max_iter : 132;<br>NN__random_state : 0; NN__solver : adam                                      | 0.705 | 0.722 |
| NN | SS       | ROS      | NN__activation : identity; NN__alpha :<br>0.3848820267958592; NN__hidden_layer_sizes : 3;<br>NN__max_iter : 149; NN__random_state : 0;<br>NN__solver : lbfgs                      | 0.705 | 0.733 |
| NN | SS       | ROS      | NN__activation : logistic; NN__alpha :<br>3.9229485139656597; NN__hidden_layer_sizes : 5;<br>NN__max_iter : 245; NN__random_state : 0;<br>NN__solver : adam                       | 0.705 | 0.724 |
| NN | MM       | ROS      | NN__activation : tanh; NN__alpha :<br>2.688786902631166; NN__hidden_layer_sizes : 30;<br>NN__max_iter : 500; NN__random_state : 0;<br>NN__solver : adam                           | 0.705 | 0.727 |

|    |    |        |                                                                                                                                                                                            |       |       |
|----|----|--------|--------------------------------------------------------------------------------------------------------------------------------------------------------------------------------------------|-------|-------|
| NN | MM | ADASYN | NN__activation : identity; NN__alpha : 10.0;<br>NN__hidden_layer_sizes : 9; NN__max_iter : 500;<br>NN__random_state : 0; NN__solver : lbfgs                                                | 0.705 | 0.729 |
| NN | MM | SMOTE  | NN__activation : identity; NN__alpha :<br>0.3653960181115047; NN__hidden_layer_sizes : 50;<br>NN__max_iter : 50; NN__random_state : 0;<br>NN__solver : adam                                | 0.705 | 0.720 |
| RF | SS | ROS    | RF__class_weight : balanced_subsample;<br>RF__criterion : log_loss; RF__max_depth : 1;<br>RF__max_features : 1; RF__min_samples_leaf : 1;<br>RF__n_estimators : 712; RF__random_state : 98 | 0.705 | 0.751 |
| RF | MM | ADASYN | RF__class_weight : balanced; RF__criterion : log_loss;<br>RF__max_depth : 1; RF__max_features : 1;<br>RF__min_samples_leaf : 5; RF__n_estimators : 418;<br>RF__random_state : 0            | 0.705 | 0.736 |
| NN | MM | ROS    | NN__activation : identity; NN__alpha :<br>1.1355598656299941; NN__hidden_layer_sizes : 50;<br>NN__max_iter : 500; NN__random_state : 0;<br>NN__solver : adam                               | 0.704 | 0.732 |
| NN | MM | ROS    | NN__activation : tanh; NN__alpha : 10.0;<br>NN__hidden_layer_sizes : 22; NN__max_iter : 50;<br>NN__random_state : 0; NN__solver : lbfgs                                                    | 0.704 | 0.727 |
| NN | MM | ROS    | NN__activation : identity; NN__alpha : 0.0001;<br>NN__hidden_layer_sizes : 50; NN__max_iter : 500;<br>NN__random_state : 0; NN__solver : adam                                              | 0.704 | 0.732 |
| NN | MM | ADASYN | NN__activation : identity; NN__alpha :<br>0.4224729525506053; NN__hidden_layer_sizes : 50;<br>NN__max_iter : 50; NN__random_state : 0;<br>NN__solver : adam                                | 0.704 | 0.721 |

|    |    |        |                                                                                                                                                                                              |       |       |
|----|----|--------|----------------------------------------------------------------------------------------------------------------------------------------------------------------------------------------------|-------|-------|
| NN | MM | ADASYN | NN__activation : identity; NN__alpha : 10.0;<br>NN__hidden_layer_sizes : 6; NN__max_iter : 50;<br>NN__random_state : 0; NN__solver : lbfgs                                                   | 0.704 | 0.729 |
| NN | SS | SMOTE  | NN__activation : identity; NN__alpha : 10.0;<br>NN__hidden_layer_sizes : 3; NN__max_iter : 301;<br>NN__random_state : 0; NN__solver : adam                                                   | 0.704 | 0.733 |
| RF | SS | ROS    | RF__class_weight : None; RF__criterion : log_loss;<br>RF__max_depth : 1; RF__max_features : 1;<br>RF__min_samples_leaf : 3; RF__n_estimators : 300;<br>RF__random_state : 29                 | 0.704 | 0.753 |
| RF | MM | ADASYN | RF__class_weight : None; RF__criterion : log_loss;<br>RF__max_depth : 1; RF__max_features : 1;<br>RF__min_samples_leaf : 5; RF__n_estimators : 370;<br>RF__random_state : 0                  | 0.704 | 0.735 |
| NN | SS | ROS    | NN__activation : identity; NN__alpha :<br>0.2516451633834142; NN__hidden_layer_sizes : 3;<br>NN__max_iter : 50; NN__random_state : 0;<br>NN__solver : lbfgs                                  | 0.704 | 0.733 |
| RF | SS | SMOTE  | RF__class_weight : None; RF__criterion : log_loss;<br>RF__max_depth : 1; RF__max_features : 1;<br>RF__min_samples_leaf : 14; RF__n_estimators : 821;<br>RF__random_state : 4                 | 0.704 | 0.739 |
| RF | MM | ROS    | RF__class_weight : balanced_subsample;<br>RF__criterion : log_loss; RF__max_depth : 1;<br>RF__max_features : 1; RF__min_samples_leaf : 20;<br>RF__n_estimators : 1000; RF__random_state : 23 | 0.704 | 0.753 |
| RF | MM | ADASYN | RF__class_weight : None; RF__criterion : log_loss;<br>RF__max_depth : 1; RF__max_features : 1;<br>RF__min_samples_leaf : 1; RF__n_estimators : 402;<br>RF__random_state : 0                  | 0.704 | 0.736 |

|    |          |          |                                                                                                                                                                                    |       |       |
|----|----------|----------|------------------------------------------------------------------------------------------------------------------------------------------------------------------------------------|-------|-------|
| RF | SS       | SMOTE    | RF__class_weight : balanced; RF__criterion : log_loss;<br>RF__max_depth : 1; RF__max_features : 1;<br>RF__min_samples_leaf : 1; RF__n_estimators : 861;<br>RF__random_state : 1    | 0.704 | 0.740 |
| RF | MM       | ROS      | RF__class_weight : None; RF__criterion : log_loss;<br>RF__max_depth : 1; RF__max_features : 1;<br>RF__min_samples_leaf : 1; RF__n_estimators : 505;<br>RF__random_state : 36       | 0.704 | 0.755 |
| NN | SS       | ROS      | NN__activation : identity; NN__alpha :<br>0.0117356998807354; NN__hidden_layer_sizes : 50;<br>NN__max_iter : 205; NN__random_state : 0;<br>NN__solver : lbfgs                      | 0.704 | 0.733 |
| RF | Not used | Not used | RF__class_weight : balanced; RF__criterion : log_loss;<br>RF__max_depth : 1; RF__max_features : 1;<br>RF__min_samples_leaf : 10; RF__n_estimators : 307;<br>RF__random_state : 100 | 0.704 | 0.752 |
| RF | SS       | ADASYN   | RF__class_weight : balanced; RF__criterion : log_loss;<br>RF__max_depth : 1; RF__max_features : 1;<br>RF__min_samples_leaf : 1; RF__n_estimators : 1000;<br>RF__random_state : 100 | 0.704 | 0.738 |
| NN | MM       | ADASYN   | NN__activation : identity; NN__alpha : 10.0;<br>NN__hidden_layer_sizes : 22; NN__max_iter : 183;<br>NN__random_state : 0; NN__solver : lbfgs                                       | 0.704 | 0.729 |
| NN | MM       | SMOTE    | NN__activation : identity; NN__alpha :<br>1.2278635248432284; NN__hidden_layer_sizes : 27;<br>NN__max_iter : 165; NN__random_state : 0;<br>NN__solver : adam                       | 0.704 | 0.729 |
| RF | MM       | ROS      | RF__class_weight : balanced; RF__criterion : log_loss;<br>RF__max_depth : 1; RF__max_features : 1;<br>RF__min_samples_leaf : 20; RF__n_estimators : 1000;<br>RF__random_state : 47 | 0.704 | 0.756 |

|    |    |        |                                                                                                                                                                                 |       |       |
|----|----|--------|---------------------------------------------------------------------------------------------------------------------------------------------------------------------------------|-------|-------|
| NN | MM | SMOTE  | NN__activation : logistic; NN__alpha : 10.0;<br>NN__hidden_layer_sizes : 50; NN__max_iter : 343;<br>NN__random_state : 0; NN__solver : adam                                     | 0.704 | 0.711 |
| NN | MM | SMOTE  | NN__activation : identity; NN__alpha : 10.0;<br>NN__hidden_layer_sizes : 3; NN__max_iter : 500;<br>NN__random_state : 0; NN__solver : adam                                      | 0.704 | 0.710 |
| NN | SS | SMOTE  | NN__activation : relu; NN__alpha : 10.0;<br>NN__hidden_layer_sizes : 3; NN__max_iter : 311;<br>NN__random_state : 0; NN__solver : adam                                          | 0.704 | 0.733 |
| NN | MM | SMOTE  | NN__activation : tanh; NN__alpha :<br>2.0451523048003124; NN__hidden_layer_sizes : 3;<br>NN__max_iter : 500; NN__random_state : 0;<br>NN__solver : adam                         | 0.704 | 0.726 |
| NN | MM | ADASYN | NN__activation : identity; NN__alpha : 10.0;<br>NN__hidden_layer_sizes : 30; NN__max_iter : 500;<br>NN__random_state : 0; NN__solver : lbfgs                                    | 0.703 | 0.729 |
| NN | SS | ROS    | NN__activation : identity; NN__alpha :<br>1.3069165088825327; NN__hidden_layer_sizes : 50;<br>NN__max_iter : 500; NN__random_state : 0;<br>NN__solver : adam                    | 0.703 | 0.733 |
| NN | SS | ROS    | NN__activation : identity; NN__alpha :<br>1.2278635248432284; NN__hidden_layer_sizes : 27;<br>NN__max_iter : 165; NN__random_state : 0;<br>NN__solver : adam                    | 0.703 | 0.733 |
| NN | MM | ADASYN | NN__activation : identity; NN__alpha : 10.0;<br>NN__hidden_layer_sizes : 50; NN__max_iter : 50;<br>NN__random_state : 0; NN__solver : adam                                      | 0.703 | 0.713 |
| RF | MM | ROS    | RF__class_weight : balanced; RF__criterion : log_loss;<br>RF__max_depth : 2; RF__max_features : 1;<br>RF__min_samples_leaf : 1; RF__n_estimators : 878;<br>RF__random_state : 0 | 0.703 | 0.771 |

|    |    |        |                                                                                                                                                                                    |       |       |
|----|----|--------|------------------------------------------------------------------------------------------------------------------------------------------------------------------------------------|-------|-------|
| RF | SS | SMOTE  | RF__class_weight : balanced; RF__criterion : log_loss;<br>RF__max_depth : 1; RF__max_features : 1;<br>RF__min_samples_leaf : 20; RF__n_estimators : 386;<br>RF__random_state : 98  | 0.703 | 0.737 |
| NN | MM | SMOTE  | NN__activation : tanh; NN__alpha : 10.0;<br>NN__hidden_layer_sizes : 50; NN__max_iter : 500;<br>NN__random_state : 0; NN__solver : lbfgs                                           | 0.703 | 0.726 |
| RF | MM | ROS    | RF__class_weight : balanced; RF__criterion : log_loss;<br>RF__max_depth : 1; RF__max_features : 1;<br>RF__min_samples_leaf : 20; RF__n_estimators : 1000;<br>RF__random_state : 71 | 0.703 | 0.754 |
| NN | MM | ADASYN | NN__activation : tanh; NN__alpha : 10.0;<br>NN__hidden_layer_sizes : 22; NN__max_iter : 50;<br>NN__random_state : 0; NN__solver : lbfgs                                            | 0.703 | 0.729 |
| NN | MM | SMOTE  | NN__activation : identity; NN__alpha :<br>8.954426783777631; NN__hidden_layer_sizes : 25;<br>NN__max_iter : 429; NN__random_state : 0;<br>NN__solver : lbfgs                       | 0.703 | 0.727 |
| NN | SS | SMOTE  | NN__activation : identity; NN__alpha : 10.0;<br>NN__hidden_layer_sizes : 3; NN__max_iter : 373;<br>NN__random_state : 0; NN__solver : adam                                         | 0.703 | 0.733 |
| NN | MM | ADASYN | NN__activation : tanh; NN__alpha :<br>1.0479599859326938; NN__hidden_layer_sizes : 7;<br>NN__max_iter : 406; NN__random_state : 0;<br>NN__solver : adam                            | 0.703 | 0.731 |
| NN | MM | SMOTE  | NN__activation : identity; NN__alpha : 10.0;<br>NN__hidden_layer_sizes : 27; NN__max_iter : 334;<br>NN__random_state : 0; NN__solver : adam                                        | 0.703 | 0.715 |
| NN | MM | ADASYN | NN__activation : tanh; NN__alpha :<br>0.0014153375045616748; NN__hidden_layer_sizes : 30;                                                                                          | 0.703 | 0.725 |

|     |          |          |                                                                                                                                                                                                                                    |       |       |
|-----|----------|----------|------------------------------------------------------------------------------------------------------------------------------------------------------------------------------------------------------------------------------------|-------|-------|
|     |          |          | NN__max_iter : 50; NN__random_state : 0;<br>NN__solver : adam                                                                                                                                                                      |       |       |
| NN  | Not used | Not used | NN__activation : identity; NN__alpha :<br>1.4346575857584027; NN__hidden_layer_sizes : 35;<br>NN__max_iter : 404; NN__random_state : 0;<br>NN__solver : lbfgs                                                                      | 0.703 | 0.735 |
| NN  | SS       | SMOTE    | NN__activation : identity; NN__alpha : 0.0001;<br>NN__hidden_layer_sizes : 3; NN__max_iter : 131;<br>NN__random_state : 0; NN__solver : adam                                                                                       | 0.703 | 0.721 |
| NN  | MM       | ADASYN   | NN__activation : tanh; NN__alpha : 10.0;<br>NN__hidden_layer_sizes : 50; NN__max_iter : 61;<br>NN__random_state : 0; NN__solver : adam                                                                                             | 0.703 | 0.716 |
| NN  | MM       | ADASYN   | NN__activation : logistic; NN__alpha : 10.0;<br>NN__hidden_layer_sizes : 50; NN__max_iter : 281;<br>NN__random_state : 0; NN__solver : adam                                                                                        | 0.703 | 0.712 |
| XGB | Not used | Not used | XGB__alpha : 6.92724037969123;<br>XGB__colsample_bytree : 1.0; XGB__gamma : 0.1;<br>XGB__max_depth : 3; XGB__min_child_weight : 0.0;<br>XGB__random_state : 0; XGB__scale_pos_weight :<br>1.5185948753904954; XGB__subsample : 0.5 | 0.703 | 0.809 |
| NN  | MM       | ADASYN   | NN__activation : identity; NN__alpha : 0.0001;<br>NN__hidden_layer_sizes : 3; NN__max_iter : 500;<br>NN__random_state : 0; NN__solver : adam                                                                                       | 0.703 | 0.728 |
| XGB | Not used | Not used | XGB__alpha : 8.171350453632432;<br>XGB__colsample_bytree : 1.0; XGB__gamma : 0.1;<br>XGB__max_depth : 3; XGB__min_child_weight : 0.0;<br>XGB__random_state : 0; XGB__scale_pos_weight : 2.0;<br>XGB__subsample : 0.5               | 0.703 | 0.812 |
| RF  | MM       | ADASYN   | RF__class_weight : None; RF__criterion : log_loss;<br>RF__max_depth : 1; RF__max_features : 1;                                                                                                                                     | 0.703 | 0.736 |

|    |    |        |                                                                                                                                                                             |       |       |
|----|----|--------|-----------------------------------------------------------------------------------------------------------------------------------------------------------------------------|-------|-------|
|    |    |        | RF__min_samples_leaf : 1; RF__n_estimators : 542;<br>RF__random_state : 0                                                                                                   |       |       |
| NN | MM | SMOTE  | NN__activation : identity; NN__alpha :<br>1.6098539665726266; NN__hidden_layer_sizes : 9;<br>NN__max_iter : 500; NN__random_state : 0;<br>NN__solver : adam                 | 0.703 | 0.730 |
| NN | MM | SMOTE  | NN__activation : relu; NN__alpha :<br>3.9814946105106603; NN__hidden_layer_sizes : 15;<br>NN__max_iter : 427; NN__random_state : 0;<br>NN__solver : adam                    | 0.703 | 0.723 |
| NN | MM | ADASYN | NN__activation : identity; NN__alpha : 10.0;<br>NN__hidden_layer_sizes : 40; NN__max_iter : 500;<br>NN__random_state : 0; NN__solver : lbfgs                                | 0.703 | 0.729 |
| NN | MM | SMOTE  | NN__activation : identity; NN__alpha : 10.0;<br>NN__hidden_layer_sizes : 27; NN__max_iter : 197;<br>NN__random_state : 0; NN__solver : adam                                 | 0.703 | 0.715 |
| NN | SS | SMOTE  | NN__activation : identity; NN__alpha : 0.0001;<br>NN__hidden_layer_sizes : 3; NN__max_iter : 196;<br>NN__random_state : 0; NN__solver : adam                                | 0.702 | 0.732 |
| NN | MM | ADASYN | NN__activation : relu; NN__alpha : 10.0;<br>NN__hidden_layer_sizes : 50; NN__max_iter : 163;<br>NN__random_state : 0; NN__solver : adam                                     | 0.702 | 0.718 |
| NN | SS | SMOTE  | NN__activation : logistic; NN__alpha :<br>3.9229485139656597; NN__hidden_layer_sizes : 5;<br>NN__max_iter : 245; NN__random_state : 0;<br>NN__solver : adam                 | 0.702 | 0.717 |
| RF | MM | ADASYN | RF__class_weight : None; RF__criterion : log_loss;<br>RF__max_depth : 1; RF__max_features : 1;<br>RF__min_samples_leaf : 1; RF__n_estimators : 527;<br>RF__random_state : 0 | 0.702 | 0.736 |



|     |          |          |                                                                                                                                                                                            |       |       |
|-----|----------|----------|--------------------------------------------------------------------------------------------------------------------------------------------------------------------------------------------|-------|-------|
| RF  | MM       | ADASYN   | RF__class_weight : balanced; RF__criterion : log_loss;<br>RF__max_depth : 1; RF__max_features : 1;<br>RF__min_samples_leaf : 20; RF__n_estimators : 473;<br>RF__random_state : 0           | 0.702 | 0.735 |
| RF  | MM       | ADASYN   | RF__class_weight : None; RF__criterion : log_loss;<br>RF__max_depth : 1; RF__max_features : 1;<br>RF__min_samples_leaf : 20; RF__n_estimators : 407;<br>RF__random_state : 0               | 0.702 | 0.733 |
| RF  | MM       | ROS      | RF__class_weight : balanced; RF__criterion : log_loss;<br>RF__max_depth : 2; RF__max_features : 1;<br>RF__min_samples_leaf : 20; RF__n_estimators : 1000;<br>RF__random_state : 0          | 0.702 | 0.768 |
| RF  | MM       | ROS      | RF__class_weight : balanced_subsample;<br>RF__criterion : log_loss; RF__max_depth : 2;<br>RF__max_features : 1; RF__min_samples_leaf : 2;<br>RF__n_estimators : 956; RF__random_state : 99 | 0.702 | 0.770 |
| NN  | MM       | ADASYN   | NN__activation : tanh; NN__alpha : 10.0;<br>NN__hidden_layer_sizes : 8; NN__max_iter : 211;<br>NN__random_state : 0; NN__solver : lbfgs                                                    | 0.702 | 0.729 |
| NN  | SS       | SMOTE    | NN__activation : identity; NN__alpha :<br>0.22138143217297065; NN__hidden_layer_sizes : 3;<br>NN__max_iter : 247; NN__random_state : 0;<br>NN__solver : adam                               | 0.702 | 0.732 |
| NN  | MM       | ADASYN   | NN__activation : identity; NN__alpha :<br>0.5298558379337189; NN__hidden_layer_sizes : 40;<br>NN__max_iter : 50; NN__random_state : 0;<br>NN__solver : adam                                | 0.702 | 0.722 |
| XGB | Not used | Not used | XGB__alpha : 5.0; XGB__colsample_bytree :<br>0.8376896768834488; XGB__gamma : 0.1;<br>XGB__max_depth : 1; XGB__min_child_weight : 0.0;                                                     | 0.702 | 0.762 |

|    |    |        |                                                                                                                                                                                   |       |       |
|----|----|--------|-----------------------------------------------------------------------------------------------------------------------------------------------------------------------------------|-------|-------|
|    |    |        | XGB__random_state : 0; XGB__scale_pos_weight : 1.298280204682432; XGB__subsample : 0.5                                                                                            |       |       |
| NN | SS | SMOTE  | NN__activation : tanh; NN__alpha : 10.0;<br>NN__hidden_layer_sizes : 3; NN__max_iter : 335;<br>NN__random_state : 0; NN__solver : adam                                            | 0.702 | 0.734 |
| NN | SS | ROS    | NN__activation : relu; NN__alpha : 10.0;<br>NN__hidden_layer_sizes : 3; NN__max_iter : 136;<br>NN__random_state : 0; NN__solver : lbfgs                                           | 0.701 | 0.748 |
| NN | SS | SMOTE  | NN__activation : identity; NN__alpha : 0.03399605266487899; NN__hidden_layer_sizes : 3;<br>NN__max_iter : 500; NN__random_state : 0;<br>NN__solver : adam                         | 0.701 | 0.731 |
| NN | MM | ADASYN | NN__activation : relu; NN__alpha : 3.9814946105106603; NN__hidden_layer_sizes : 15;<br>NN__max_iter : 427; NN__random_state : 0;<br>NN__solver : adam                             | 0.701 | 0.724 |
| NN | MM | ADASYN | NN__activation : logistic; NN__alpha : 10.0;<br>NN__hidden_layer_sizes : 27; NN__max_iter : 50;<br>NN__random_state : 0; NN__solver : lbfgs                                       | 0.701 | 0.714 |
| RF | SS | ADASYN | RF__class_weight : balanced; RF__criterion : gini;<br>RF__max_depth : 1; RF__max_features : 1;<br>RF__min_samples_leaf : 1; RF__n_estimators : 300;<br>RF__random_state : 0       | 0.701 | 0.733 |
| NN | MM | ADASYN | NN__activation : logistic; NN__alpha : 0.43513970791520495; NN__hidden_layer_sizes : 40;<br>NN__max_iter : 192; NN__random_state : 0;<br>NN__solver : adam                        | 0.701 | 0.722 |
| RF | MM | ROS    | RF__class_weight : balanced; RF__criterion : log_loss;<br>RF__max_depth : 1; RF__max_features : 1;<br>RF__min_samples_leaf : 20; RF__n_estimators : 300;<br>RF__random_state : 76 | 0.701 | 0.753 |

|     |          |          |                                                                                                                                                                                                                                     |       |       |
|-----|----------|----------|-------------------------------------------------------------------------------------------------------------------------------------------------------------------------------------------------------------------------------------|-------|-------|
| NN  | SS       | ROS      | NN__activation : identity; NN__alpha : 0.0001;<br>NN__hidden_layer_sizes : 50; NN__max_iter : 221;<br>NN__random_state : 0; NN__solver : adam                                                                                       | 0.701 | 0.733 |
| NN  | MM       | ADASYN   | NN__activation : tanh; NN__alpha : 10.0;<br>NN__hidden_layer_sizes : 6; NN__max_iter : 395;<br>NN__random_state : 0; NN__solver : lbfgs                                                                                             | 0.701 | 0.729 |
| XGB | Not used | Not used | XGB__alpha : 9.05087965932921;<br>XGB__colsample_bytree : 1.0; XGB__gamma : 0.1;<br>XGB__max_depth : 3; XGB__min_child_weight : 0.0;<br>XGB__random_state : 0; XGB__scale_pos_weight : 2.0;<br>XGB__subsample : 0.5199689455342374  | 0.701 | 0.798 |
| XGB | Not used | Not used | XGB__alpha : 8.196217519929151;<br>XGB__colsample_bytree : 1.0; XGB__gamma : 0.1;<br>XGB__max_depth : 3; XGB__min_child_weight : 0.0;<br>XGB__random_state : 0; XGB__scale_pos_weight : 2.0;<br>XGB__subsample : 0.5208769421800412 | 0.701 | 0.810 |
| NN  | MM       | ADASYN   | NN__activation : logistic; NN__alpha : 10.0;<br>NN__hidden_layer_sizes : 15; NN__max_iter : 50;<br>NN__random_state : 0; NN__solver : lbfgs                                                                                         | 0.701 | 0.714 |
| RF  | MM       | ADASYN   | RF__class_weight : None; RF__criterion : log_loss;<br>RF__max_depth : 1; RF__max_features : 1;<br>RF__min_samples_leaf : 1; RF__n_estimators : 515;<br>RF__random_state : 0                                                         | 0.700 | 0.736 |
| RF  | MM       | ADASYN   | RF__class_weight : None; RF__criterion : log_loss;<br>RF__max_depth : 1; RF__max_features : 1;<br>RF__min_samples_leaf : 1; RF__n_estimators : 502;<br>RF__random_state : 0                                                         | 0.700 | 0.736 |
| NN  | Not used | Not used | NN__activation : tanh; NN__alpha : 0.0001;<br>NN__hidden_layer_sizes : 20; NN__max_iter : 500;<br>NN__random_state : 0; NN__solver : adam                                                                                           | 0.700 | 0.725 |

|     |          |          |                                                                                                                                                                                                                                                        |       |       |
|-----|----------|----------|--------------------------------------------------------------------------------------------------------------------------------------------------------------------------------------------------------------------------------------------------------|-------|-------|
| NN  | MM       | ADASYN   | NN__activation : relu; NN__alpha : 10.0;<br>NN__hidden_layer_sizes : 3; NN__max_iter : 500;<br>NN__random_state : 0; NN__solver : adam                                                                                                                 | 0.700 | 0.712 |
| RF  | Not used | Not used | RF__class_weight : balanced; RF__criterion : log_loss;<br>RF__max_depth : 2; RF__max_features : 1;<br>RF__min_samples_leaf : 1; RF__n_estimators : 1000;<br>RF__random_state : 100                                                                     | 0.700 | 0.771 |
| XGB | Not used | Not used | XGB__alpha : 7.1892679279518354;<br>XGB__colsample_bytree : 1.0; XGB__gamma : 0.1;<br>XGB__max_depth : 3; XGB__min_child_weight : 0.0;<br>XGB__random_state : 0; XGB__scale_pos_weight :<br>1.5839827095911299; XGB__subsample :<br>0.6736377307490001 | 0.700 | 0.815 |
| RF  | MM       | ROS      | RF__class_weight : balanced_subsample;<br>RF__criterion : log_loss; RF__max_depth : 2;<br>RF__max_features : 1; RF__min_samples_leaf : 1;<br>RF__n_estimators : 333; RF__random_state : 58                                                             | 0.700 | 0.770 |
| RF  | MM       | ADASYN   | RF__class_weight : None; RF__criterion : log_loss;<br>RF__max_depth : 1; RF__max_features : 1;<br>RF__min_samples_leaf : 1; RF__n_estimators : 514;<br>RF__random_state : 0                                                                            | 0.700 | 0.736 |
| RF  | MM       | ADASYN   | RF__class_weight : None; RF__criterion : log_loss;<br>RF__max_depth : 1; RF__max_features : 1;<br>RF__min_samples_leaf : 1; RF__n_estimators : 468;<br>RF__random_state : 0                                                                            | 0.700 | 0.737 |
| NN  | SS       | SMOTE    | NN__activation : logistic; NN__alpha : 10.0;<br>NN__hidden_layer_sizes : 9; NN__max_iter : 117;<br>NN__random_state : 0; NN__solver : lbfgs                                                                                                            | 0.700 | 0.734 |
| NN  | SS       | ADASYN   | NN__activation : tanh; NN__alpha : 10.0;<br>NN__hidden_layer_sizes : 50; NN__max_iter : 500;<br>NN__random_state : 0; NN__solver : adam                                                                                                                | 0.700 | 0.733 |

|     |          |          |                                                                                                                                                                                                                      |       |       |
|-----|----------|----------|----------------------------------------------------------------------------------------------------------------------------------------------------------------------------------------------------------------------|-------|-------|
| XGB | Not used | Not used | XGB__alpha : 9.526170761453628;<br>XGB__colsample_bytree : 1.0; XGB__gamma : 0.1;<br>XGB__max_depth : 3; XGB__min_child_weight : 0.0;<br>XGB__random_state : 0; XGB__scale_pos_weight : 2.0;<br>XGB__subsample : 0.7 | 0.700 | 0.800 |
| NN  | MM       | ADASYN   | NN__activation : tanh; NN__alpha : 10.0;<br>NN__hidden_layer_sizes : 7; NN__max_iter : 500;<br>NN__random_state : 0; NN__solver : adam                                                                               | 0.700 | 0.719 |
| NN  | SS       | ADASYN   | NN__activation : identity; NN__alpha : 10.0;<br>NN__hidden_layer_sizes : 50; NN__max_iter : 500;<br>NN__random_state : 0; NN__solver : adam                                                                          | 0.699 | 0.733 |
| RF  | Not used | Not used | RF__class_weight : None; RF__criterion : gini;<br>RF__max_depth : 2; RF__max_features : 1;<br>RF__min_samples_leaf : 1; RF__n_estimators : 300;<br>RF__random_state : 0                                              | 0.699 | 0.770 |
| RF  | SS       | ADASYN   | RF__class_weight : balanced_subsample;<br>RF__criterion : gini; RF__max_depth : 1;<br>RF__max_features : 1; RF__min_samples_leaf : 1;<br>RF__n_estimators : 484; RF__random_state : 85                               | 0.699 | 0.734 |
| RF  | MM       | ROS      | RF__class_weight : balanced; RF__criterion : log_loss;<br>RF__max_depth : 2; RF__max_features : 1;<br>RF__min_samples_leaf : 20; RF__n_estimators : 300;<br>RF__random_state : 100                                   | 0.699 | 0.764 |
| RF  | SS       | ROS      | RF__class_weight : balanced; RF__criterion : log_loss;<br>RF__max_depth : 2; RF__max_features : 1;<br>RF__min_samples_leaf : 20; RF__n_estimators : 300;<br>RF__random_state : 100                                   | 0.699 | 0.764 |
| RF  | SS       | ROS      | RF__class_weight : None; RF__criterion : gini;<br>RF__max_depth : 2; RF__max_features : 1;<br>RF__min_samples_leaf : 1; RF__n_estimators : 504;<br>RF__random_state : 14                                             | 0.699 | 0.772 |

|    |    |        |                                                                                                                                                                                             |       |       |
|----|----|--------|---------------------------------------------------------------------------------------------------------------------------------------------------------------------------------------------|-------|-------|
| NN | SS | SMOTE  | NN__activation : identity; NN__alpha : 10.0;<br>NN__hidden_layer_sizes : 10; NN__max_iter : 447;<br>NN__random_state : 0; NN__solver : adam                                                 | 0.699 | 0.734 |
| RF | MM | ROS    | RF__class_weight : balanced; RF__criterion : log_loss;<br>RF__max_depth : 3; RF__max_features : 1;<br>RF__min_samples_leaf : 2; RF__n_estimators : 300;<br>RF__random_state : 72            | 0.699 | 0.790 |
| RF | MM | ADASYN | RF__class_weight : balanced_subsample;<br>RF__criterion : log_loss; RF__max_depth : 1;<br>RF__max_features : 1; RF__min_samples_leaf : 1;<br>RF__n_estimators : 535; RF__random_state : 0   | 0.699 | 0.736 |
| RF | MM | ADASYN | RF__class_weight : None; RF__criterion : log_loss;<br>RF__max_depth : 1; RF__max_features : 1;<br>RF__min_samples_leaf : 5; RF__n_estimators : 450;<br>RF__random_state : 0                 | 0.699 | 0.737 |
| RF | MM | SMOTE  | RF__class_weight : balanced_subsample;<br>RF__criterion : log_loss; RF__max_depth : 1;<br>RF__max_features : 1; RF__min_samples_leaf : 20;<br>RF__n_estimators : 1000; RF__random_state : 0 | 0.698 | 0.738 |
| RF | SS | SMOTE  | RF__class_weight : None; RF__criterion : gini;<br>RF__max_depth : 1; RF__max_features : 1;<br>RF__min_samples_leaf : 9; RF__n_estimators : 999;<br>RF__random_state : 4                     | 0.698 | 0.735 |
| RF | MM | ADASYN | RF__class_weight : None; RF__criterion : log_loss;<br>RF__max_depth : 1; RF__max_features : 1;<br>RF__min_samples_leaf : 20; RF__n_estimators : 533;<br>RF__random_state : 0                | 0.698 | 0.734 |
| RF | SS | ROS    | RF__class_weight : balanced_subsample;<br>RF__criterion : gini; RF__max_depth : 1;<br>RF__max_features : 1; RF__min_samples_leaf : 20;<br>RF__n_estimators : 300; RF__random_state : 26     | 0.698 | 0.754 |

|     |          |          |                                                                                                                                                                                                                          |       |       |
|-----|----------|----------|--------------------------------------------------------------------------------------------------------------------------------------------------------------------------------------------------------------------------|-------|-------|
| NN  | Not used | Not used | NN__activation : tanh; NN__alpha : 0.18681865077814802; NN__hidden_layer_sizes : 27; NN__max_iter : 349; NN__random_state : 0; NN__solver : adam                                                                         | 0.698 | 0.756 |
| RF  | SS       | SMOTE    | RF__class_weight : None; RF__criterion : gini; RF__max_depth : 1; RF__max_features : 1; RF__min_samples_leaf : 15; RF__n_estimators : 775; RF__random_state : 9                                                          | 0.698 | 0.735 |
| XGB | MM       | ROS      | XGB__alpha : 5.0; XGB__colsample_bytree : 1.0; XGB__gamma : 0.1; XGB__max_depth : 1; XGB__min_child_weight : 2.796923680739347; XGB__random_state : 0; XGB__scale_pos_weight : 1.8812267303489647; XGB__subsample : 0.7  | 0.698 | 0.801 |
| XGB | Not used | Not used | XGB__alpha : 6.4802030805053175; XGB__colsample_bytree : 1.0; XGB__gamma : 0.1; XGB__max_depth : 3; XGB__min_child_weight : 0.0; XGB__random_state : 0; XGB__scale_pos_weight : 1.5154649125645612; XGB__subsample : 0.5 | 0.698 | 0.817 |
| RF  | Not used | Not used | RF__class_weight : balanced; RF__criterion : gini; RF__max_depth : 1; RF__max_features : 1; RF__min_samples_leaf : 1; RF__n_estimators : 1000; RF__random_state : 100                                                    | 0.698 | 0.756 |
| RF  | MM       | ADASYN   | RF__class_weight : None; RF__criterion : log_loss; RF__max_depth : 1; RF__max_features : 1; RF__min_samples_leaf : 20; RF__n_estimators : 519; RF__random_state : 0                                                      | 0.697 | 0.734 |
| RF  | MM       | ADASYN   | RF__class_weight : None; RF__criterion : log_loss; RF__max_depth : 1; RF__max_features : 1; RF__min_samples_leaf : 1; RF__n_estimators : 300; RF__random_state : 0                                                       | 0.697 | 0.734 |

|     |          |          |                                                                                                                                                                                                                      |       |       |
|-----|----------|----------|----------------------------------------------------------------------------------------------------------------------------------------------------------------------------------------------------------------------|-------|-------|
| RF  | SS       | ADASYN   | RF__class_weight : None; RF__criterion : gini;<br>RF__max_depth : 1; RF__max_features : 1;<br>RF__min_samples_leaf : 20; RF__n_estimators : 650;<br>RF__random_state : 0                                             | 0.697 | 0.730 |
| NN  | SS       | ADASYN   | NN__activation : logistic; NN__alpha :<br>0.43513970791520495; NN__hidden_layer_sizes : 40;<br>NN__max_iter : 192; NN__random_state : 0;<br>NN__solver : adam                                                        | 0.697 | 0.732 |
| NN  | Not used | Not used | NN__activation : identity; NN__alpha :<br>3.97855097535385; NN__hidden_layer_sizes : 4;<br>NN__max_iter : 62; NN__random_state : 0;<br>NN__solver : lbfgs                                                            | 0.697 | 0.731 |
| XGB | MM       | ROS      | XGB__alpha : 5.0; XGB__colsample_bytree : 1.0;<br>XGB__gamma : 0.1; XGB__max_depth : 1;<br>XGB__min_child_weight : 0.0; XGB__random_state :<br>0; XGB__scale_pos_weight : 2.0; XGB__subsample :<br>0.7               | 0.697 | 0.801 |
| XGB | Not used | Not used | XGB__alpha : 8.443102490629965;<br>XGB__colsample_bytree : 1.0; XGB__gamma : 0.1;<br>XGB__max_depth : 3; XGB__min_child_weight : 0.0;<br>XGB__random_state : 0; XGB__scale_pos_weight : 2.0;<br>XGB__subsample : 0.5 | 0.697 | 0.808 |
| RF  | MM       | ADASYN   | RF__class_weight : balanced_subsample;<br>RF__criterion : log_loss; RF__max_depth : 1;<br>RF__max_features : 1; RF__min_samples_leaf : 15;<br>RF__n_estimators : 552; RF__random_state : 0                           | 0.697 | 0.736 |
| RF  | SS       | ROS      | RF__class_weight : None; RF__criterion : log_loss;<br>RF__max_depth : 1; RF__max_features : 1;<br>RF__min_samples_leaf : 1; RF__n_estimators : 302;<br>RF__random_state : 53                                         | 0.697 | 0.756 |



|     |          |          |                                                                                                                                                                                                                                      |       |       |
|-----|----------|----------|--------------------------------------------------------------------------------------------------------------------------------------------------------------------------------------------------------------------------------------|-------|-------|
| XGB | Not used | Not used | XGB__alpha : 5.0; XGB__colsample_bytree : 1.0;<br>XGB__gamma : 0.1; XGB__max_depth : 3;<br>XGB__min_child_weight : 0.0; XGB__random_state :<br>0; XGB__scale_pos_weight : 1.4571087307953596;<br>XGB__subsample : 0.5274138585267871 | 0.697 | 0.850 |
| RF  | MM       | ADASYN   | RF__class_weight : None; RF__criterion : log_loss;<br>RF__max_depth : 1; RF__max_features : 1;<br>RF__min_samples_leaf : 1; RF__n_estimators : 1000;<br>RF__random_state : 0                                                         | 0.697 | 0.734 |
| RF  | SS       | SMOTE    | RF__class_weight : None; RF__criterion : gini;<br>RF__max_depth : 1; RF__max_features : 1;<br>RF__min_samples_leaf : 1; RF__n_estimators : 378;<br>RF__random_state : 35                                                             | 0.697 | 0.733 |
| RF  | SS       | SMOTE    | RF__class_weight : balanced_subsample;<br>RF__criterion : log_loss; RF__max_depth : 1;<br>RF__max_features : 1; RF__min_samples_leaf : 1;<br>RF__n_estimators : 1000; RF__random_state : 100                                         | 0.697 | 0.739 |
| NN  | Not used | Not used | NN__activation : tanh; NN__alpha :<br>0.13140976907192184; NN__hidden_layer_sizes : 30;<br>NN__max_iter : 500; NN__random_state : 0;<br>NN__solver : adam                                                                            | 0.697 | 0.761 |
| RF  | MM       | ADASYN   | RF__class_weight : balanced; RF__criterion : log_loss;<br>RF__max_depth : 1; RF__max_features : 1;<br>RF__min_samples_leaf : 3; RF__n_estimators : 364;<br>RF__random_state : 0                                                      | 0.697 | 0.735 |
| NN  | Not used | Not used | NN__activation : relu; NN__alpha :<br>0.003366028940110959; NN__hidden_layer_sizes : 50;<br>NN__max_iter : 50; NN__random_state : 0;<br>NN__solver : lbfgs                                                                           | 0.697 | 0.743 |
| RF  | SS       | ADASYN   | RF__class_weight : balanced; RF__criterion : log_loss;<br>RF__max_depth : 2; RF__max_features : 1;                                                                                                                                   | 0.696 | 0.749 |

|     |          |          |                                                                                                                                                                                                                                     |       |       |
|-----|----------|----------|-------------------------------------------------------------------------------------------------------------------------------------------------------------------------------------------------------------------------------------|-------|-------|
|     |          |          | RF__min_samples_leaf : 3; RF__n_estimators : 880;<br>RF__random_state : 95                                                                                                                                                          |       |       |
| XGB | Not used | Not used | XGB__alpha : 8.280818556474479;<br>XGB__colsample_bytree : 1.0; XGB__gamma : 0.1;<br>XGB__max_depth : 2; XGB__min_child_weight : 0.0;<br>XGB__random_state : 0; XGB__scale_pos_weight :<br>1.3954288288051107; XGB__subsample : 0.5 | 0.696 | 0.764 |
| NN  | Not used | Not used | NN__activation : tanh; NN__alpha :<br>0.3184983766348907; NN__hidden_layer_sizes : 35;<br>NN__max_iter : 237; NN__random_state : 0;<br>NN__solver : adam                                                                            | 0.696 | 0.753 |
| RF  | SS       | SMOTE    | RF__class_weight : None; RF__criterion : gini;<br>RF__max_depth : 1; RF__max_features : 1;<br>RF__min_samples_leaf : 1; RF__n_estimators : 833;<br>RF__random_state : 35                                                            | 0.696 | 0.735 |
| RF  | Not used | Not used | RF__class_weight : balanced; RF__criterion : gini;<br>RF__max_depth : 1; RF__max_features : 1;<br>RF__min_samples_leaf : 20; RF__n_estimators : 1000;<br>RF__random_state : 100                                                     | 0.696 | 0.752 |
| RF  | MM       | SMOTE    | RF__class_weight : None; RF__criterion : gini;<br>RF__max_depth : 1; RF__max_features : 1;<br>RF__min_samples_leaf : 20; RF__n_estimators : 1000;<br>RF__random_state : 85                                                          | 0.696 | 0.736 |
| RF  | MM       | ADASYN   | RF__class_weight : None; RF__criterion : log_loss;<br>RF__max_depth : 1; RF__max_features : 1;<br>RF__min_samples_leaf : 1; RF__n_estimators : 693;<br>RF__random_state : 0                                                         | 0.696 | 0.734 |
| XGB | Not used | Not used | XGB__alpha : 11.655829440952115;<br>XGB__colsample_bytree : 0.9744062933741346;<br>XGB__gamma : 0.1; XGB__max_depth : 3;<br>XGB__min_child_weight : 0.0; XGB__random_state :                                                        | 0.696 | 0.776 |

|     |          |          |                                                                                                                                                                                                                                  |       |       |
|-----|----------|----------|----------------------------------------------------------------------------------------------------------------------------------------------------------------------------------------------------------------------------------|-------|-------|
|     |          |          | 0; XGB__scale_pos_weight : 2.0; XGB__subsample : 0.7                                                                                                                                                                             |       |       |
| RF  | SS       | SMOTE    | RF__class_weight : balanced; RF__criterion : log_loss;<br>RF__max_depth : 1; RF__max_features : 1;<br>RF__min_samples_leaf : 20; RF__n_estimators : 300;<br>RF__random_state : 32                                                | 0.696 | 0.736 |
| NN  | SS       | ADASYN   | NN__activation : identity; NN__alpha : 10.0;<br>NN__hidden_layer_sizes : 8; NN__max_iter : 427;<br>NN__random_state : 0; NN__solver : adam                                                                                       | 0.695 | 0.732 |
| RF  | SS       | ROS      | RF__class_weight : None; RF__criterion : gini;<br>RF__max_depth : 1; RF__max_features : 1;<br>RF__min_samples_leaf : 13; RF__n_estimators : 996;<br>RF__random_state : 95                                                        | 0.695 | 0.757 |
| RF  | MM       | SMOTE    | RF__class_weight : None; RF__criterion : log_loss;<br>RF__max_depth : 1; RF__max_features : 1;<br>RF__min_samples_leaf : 1; RF__n_estimators : 1000;<br>RF__random_state : 0                                                     | 0.695 | 0.739 |
| XGB | Not used | Not used | XGB__alpha : 7.243938265936928;<br>XGB__colsample_bytree : 1.0; XGB__gamma : 0.1;<br>XGB__max_depth : 3; XGB__min_child_weight : 0.0;<br>XGB__random_state : 0; XGB__scale_pos_weight : 1.5328972807761156; XGB__subsample : 0.7 | 0.695 | 0.809 |
| XGB | Not used | Not used | XGB__alpha : 5.0; XGB__colsample_bytree : 1.0;<br>XGB__gamma : 0.1; XGB__max_depth : 3;<br>XGB__min_child_weight : 0.0; XGB__random_state : 0;<br>XGB__scale_pos_weight : 1.4000978172593856;<br>XGB__subsample : 0.5            | 0.695 | 0.847 |
| XGB | Not used | Not used | XGB__alpha : 9.099041682064584;<br>XGB__colsample_bytree : 1.0; XGB__gamma : 0.1;<br>XGB__max_depth : 3; XGB__min_child_weight : 0.0;                                                                                            | 0.695 | 0.797 |

|     |          |          |                                                                                                                                                                                                                                                       |       |       |
|-----|----------|----------|-------------------------------------------------------------------------------------------------------------------------------------------------------------------------------------------------------------------------------------------------------|-------|-------|
|     |          |          | XGB__random_state : 0; XGB__scale_pos_weight : 2.0;<br>XGB__subsample : 0.5                                                                                                                                                                           |       |       |
| RF  | SS       | SMOTE    | RF__class_weight : None; RF__criterion : log_loss;<br>RF__max_depth : 1; RF__max_features : 1;<br>RF__min_samples_leaf : 1; RF__n_estimators : 300;<br>RF__random_state : 100                                                                         | 0.695 | 0.738 |
| RF  | SS       | SMOTE    | RF__class_weight : balanced_subsample;<br>RF__criterion : log_loss; RF__max_depth : 1;<br>RF__max_features : 1; RF__min_samples_leaf : 1;<br>RF__n_estimators : 639; RF__random_state : 76                                                            | 0.695 | 0.739 |
| XGB | Not used | Not used | XGB__alpha : 5.0; XGB__colsample_bytree :<br>0.9151521394428219; XGB__gamma :<br>0.9460595040693235; XGB__max_depth : 1;<br>XGB__min_child_weight : 0.0; XGB__random_state :<br>0; XGB__scale_pos_weight : 2.0; XGB__subsample :<br>0.637481203375762 | 0.695 | 0.763 |
| RF  | MM       | ADASYN   | RF__class_weight : balanced; RF__criterion : log_loss;<br>RF__max_depth : 1; RF__max_features : 1;<br>RF__min_samples_leaf : 1; RF__n_estimators : 1000;<br>RF__random_state : 0                                                                      | 0.695 | 0.735 |
| XGB | Not used | Not used | XGB__alpha : 8.957078766175758;<br>XGB__colsample_bytree : 1.0; XGB__gamma : 0.1;<br>XGB__max_depth : 3; XGB__min_child_weight : 0.0;<br>XGB__random_state : 0; XGB__scale_pos_weight : 2.0;<br>XGB__subsample : 0.5179020598467076                   | 0.695 | 0.801 |
| XGB | Not used | Not used | XGB__alpha : 5.0; XGB__colsample_bytree : 1.0;<br>XGB__gamma : 0.1; XGB__max_depth : 1;<br>XGB__min_child_weight : 0.0; XGB__random_state :<br>0; XGB__scale_pos_weight : 1.2784614768851763;<br>XGB__subsample : 0.5                                 | 0.695 | 0.763 |

|     |          |          |                                                                                                                                                                                                                                     |       |       |
|-----|----------|----------|-------------------------------------------------------------------------------------------------------------------------------------------------------------------------------------------------------------------------------------|-------|-------|
| XGB | Not used | Not used | XGB__alpha : 9.010919349065759;<br>XGB__colsample_bytree : 1.0; XGB__gamma : 0.1;<br>XGB__max_depth : 2; XGB__min_child_weight : 0.0;<br>XGB__random_state : 0; XGB__scale_pos_weight : 2.0;<br>XGB__subsample : 0.5                | 0.694 | 0.783 |
| RF  | MM       | ADASYN   | RF__class_weight : balanced; RF__criterion : log_loss;<br>RF__max_depth : 1; RF__max_features : 1;<br>RF__min_samples_leaf : 1; RF__n_estimators : 300;<br>RF__random_state : 0                                                     | 0.694 | 0.734 |
| XGB | Not used | Not used | XGB__alpha : 8.092701485401358;<br>XGB__colsample_bytree : 1.0; XGB__gamma : 0.1;<br>XGB__max_depth : 2; XGB__min_child_weight : 0.0;<br>XGB__random_state : 0; XGB__scale_pos_weight : 2.0;<br>XGB__subsample : 0.6844148110857339 | 0.694 | 0.800 |
| NN  | SS       | ADASYN   | NN__activation : identity; NN__alpha : 10.0;<br>NN__hidden_layer_sizes : 50; NN__max_iter : 50;<br>NN__random_state : 0; NN__solver : adam                                                                                          | 0.694 | 0.731 |
| RF  | Not used | Not used | RF__class_weight : balanced; RF__criterion : gini;<br>RF__max_depth : 2; RF__max_features : 1;<br>RF__min_samples_leaf : 6; RF__n_estimators : 1000;<br>RF__random_state : 100                                                      | 0.694 | 0.771 |
| XGB | MM       | ROS      | XGB__alpha : 5.0; XGB__colsample_bytree : 0.5;<br>XGB__gamma : 0.1; XGB__max_depth : 1;<br>XGB__min_child_weight : 4.880214389032;<br>XGB__random_state : 0; XGB__scale_pos_weight :<br>1.586542707126661; XGB__subsample : 0.7     | 0.694 | 0.788 |
| RF  | SS       | ROS      | RF__class_weight : None; RF__criterion : gini;<br>RF__max_depth : 2; RF__max_features : 1;<br>RF__min_samples_leaf : 7; RF__n_estimators : 1000;<br>RF__random_state : 100                                                          | 0.694 | 0.771 |

|     |          |          |                                                                                                                                                                                                                                    |       |       |
|-----|----------|----------|------------------------------------------------------------------------------------------------------------------------------------------------------------------------------------------------------------------------------------|-------|-------|
| XGB | Not used | Not used | XGB__alpha : 6.912497227354138;<br>XGB__colsample_bytree : 1.0; XGB__gamma : 0.1;<br>XGB__max_depth : 1; XGB__min_child_weight : 0.0;<br>XGB__random_state : 0; XGB__scale_pos_weight :<br>1.402302773432067; XGB__subsample : 0.5 | 0.694 | 0.750 |
| RF  | SS       | SMOTE    | RF__class_weight : balanced_subsample;<br>RF__criterion : log_loss; RF__max_depth : 2;<br>RF__max_features : 1; RF__min_samples_leaf : 1;<br>RF__n_estimators : 1000; RF__random_state : 65                                        | 0.694 | 0.755 |
| RF  | MM       | ADASYN   | RF__class_weight : balanced; RF__criterion : log_loss;<br>RF__max_depth : 1; RF__max_features : 1;<br>RF__min_samples_leaf : 1; RF__n_estimators : 665;<br>RF__random_state : 0                                                    | 0.694 | 0.734 |
| XGB | Not used | Not used | XGB__alpha : 8.679351706688038;<br>XGB__colsample_bytree : 1.0; XGB__gamma : 0.1;<br>XGB__max_depth : 3; XGB__min_child_weight : 0.0;<br>XGB__random_state : 0; XGB__scale_pos_weight : 2.0;<br>XGB__subsample : 0.7               | 0.694 | 0.811 |
| RF  | MM       | ADASYN   | RF__class_weight : None; RF__criterion : log_loss;<br>RF__max_depth : 1; RF__max_features : 1;<br>RF__min_samples_leaf : 20; RF__n_estimators : 300;<br>RF__random_state : 0                                                       | 0.694 | 0.733 |
| XGB | MM       | ROS      | XGB__alpha : 5.0; XGB__colsample_bytree : 0.5;<br>XGB__gamma : 0.1; XGB__max_depth : 1;<br>XGB__min_child_weight : 0.0; XGB__random_state :<br>0; XGB__scale_pos_weight : 2.0; XGB__subsample :<br>0.7                             | 0.694 | 0.793 |
| XGB | SS       | ROS      | XGB__alpha : 5.0; XGB__colsample_bytree : 0.5;<br>XGB__gamma : 0.1; XGB__max_depth : 1;<br>XGB__min_child_weight : 0.0; XGB__random_state :                                                                                        | 0.694 | 0.793 |

|     |          |          |                                                                                                                                                                                                                                     |       |       |
|-----|----------|----------|-------------------------------------------------------------------------------------------------------------------------------------------------------------------------------------------------------------------------------------|-------|-------|
|     |          |          | 0; XGB__scale_pos_weight : 2.0; XGB__subsample : 0.7                                                                                                                                                                                |       |       |
| NN  | SS       | ADASYN   | NN__activation : logistic; NN__alpha : 0.0001;<br>NN__hidden_layer_sizes : 50; NN__max_iter : 500;<br>NN__random_state : 0; NN__solver : adam                                                                                       | 0.694 | 0.731 |
| RF  | MM       | SMOTE    | RF__class_weight : None; RF__criterion : gini;<br>RF__max_depth : 1; RF__max_features : 1;<br>RF__min_samples_leaf : 1; RF__n_estimators : 300;<br>RF__random_state : 0                                                             | 0.694 | 0.736 |
| XGB | Not used | Not used | XGB__alpha : 8.495224571374575;<br>XGB__colsample_bytree : 1.0; XGB__gamma : 0.1;<br>XGB__max_depth : 3; XGB__min_child_weight : 0.0;<br>XGB__random_state : 0; XGB__scale_pos_weight : 2.0;<br>XGB__subsample : 0.6255803647450987 | 0.693 | 0.812 |
| NN  | SS       | ADASYN   | NN__activation : logistic; NN__alpha : 3.9229485139656597; NN__hidden_layer_sizes : 5;<br>NN__max_iter : 245; NN__random_state : 0;<br>NN__solver : adam                                                                            | 0.693 | 0.711 |
| RF  | MM       | ADASYN   | RF__class_weight : balanced; RF__criterion : log_loss;<br>RF__max_depth : 1; RF__max_features : 1;<br>RF__min_samples_leaf : 1; RF__n_estimators : 507;<br>RF__random_state : 16                                                    | 0.693 | 0.736 |
| XGB | Not used | Not used | XGB__alpha : 7.272337795761228;<br>XGB__colsample_bytree : 1.0; XGB__gamma : 0.1;<br>XGB__max_depth : 3; XGB__min_child_weight : 0.0;<br>XGB__random_state : 0; XGB__scale_pos_weight : 1.6314346406422557; XGB__subsample : 0.7    | 0.693 | 0.816 |
| XGB | Not used | Not used | XGB__alpha : 5.0; XGB__colsample_bytree : 0.9916484327040396; XGB__gamma : 0.1;<br>XGB__max_depth : 1; XGB__min_child_weight : 0.0;                                                                                                 | 0.693 | 0.760 |

|     |          |          |                                                                                                                                                                                                                                   |       |       |
|-----|----------|----------|-----------------------------------------------------------------------------------------------------------------------------------------------------------------------------------------------------------------------------------|-------|-------|
|     |          |          | XGB__random_state : 0; XGB__scale_pos_weight : 1.1125583133014976; XGB__subsample : 0.7                                                                                                                                           |       |       |
| XGB | Not used | Not used | XGB__alpha : 7.207669982860329;<br>XGB__colsample_bytree : 1.0; XGB__gamma : 0.1;<br>XGB__max_depth : 3; XGB__min_child_weight : 0.0;<br>XGB__random_state : 0; XGB__scale_pos_weight : 0.9427346130779876; XGB__subsample : 0.5  | 0.693 | 0.751 |
| XGB | MM       | ROS      | XGB__alpha : 5.0; XGB__colsample_bytree : 0.8235208189215857; XGB__gamma : 0.1;<br>XGB__max_depth : 1; XGB__min_child_weight : 0.0;<br>XGB__random_state : 0; XGB__scale_pos_weight : 2.0;<br>XGB__subsample : 0.5475153456705577 | 0.692 | 0.793 |
| XGB | SS       | ROS      | XGB__alpha : 5.0; XGB__colsample_bytree : 0.8235208189215857; XGB__gamma : 0.1;<br>XGB__max_depth : 1; XGB__min_child_weight : 0.0;<br>XGB__random_state : 0; XGB__scale_pos_weight : 2.0;<br>XGB__subsample : 0.5475153456705577 | 0.692 | 0.793 |
| RF  | SS       | ROS      | RF__class_weight : balanced; RF__criterion : log_loss;<br>RF__max_depth : 3; RF__max_features : 1;<br>RF__min_samples_leaf : 11; RF__n_estimators : 526;<br>RF__random_state : 96                                                 | 0.692 | 0.790 |
| NN  | SS       | ADASYN   | NN__activation : logistic; NN__alpha : 0.8035852444950408; NN__hidden_layer_sizes : 50;<br>NN__max_iter : 500; NN__random_state : 0;<br>NN__solver : adam                                                                         | 0.692 | 0.732 |
| XGB | MM       | ROS      | XGB__alpha : 5.0; XGB__colsample_bytree : 1.0;<br>XGB__gamma : 0.1; XGB__max_depth : 1;<br>XGB__min_child_weight : 0.0; XGB__random_state : 0;<br>XGB__scale_pos_weight : 1.625882542094309;<br>XGB__subsample : 0.5              | 0.692 | 0.794 |



|     |    |        |                                                                                                                                                                                            |       |       |
|-----|----|--------|--------------------------------------------------------------------------------------------------------------------------------------------------------------------------------------------|-------|-------|
| RF  | SS | ROS    | RF__class_weight : balanced_subsample;<br>RF__criterion : log_loss; RF__max_depth : 3;<br>RF__max_features : 1; RF__min_samples_leaf : 1;<br>RF__n_estimators : 444; RF__random_state : 49 | 0.692 | 0.798 |
| NN  | SS | ADASYN | NN__activation : tanh; NN__alpha :<br>2.6096146808538574; NN__hidden_layer_sizes : 8;<br>NN__max_iter : 478; NN__random_state : 0;<br>NN__solver : adam                                    | 0.691 | 0.741 |
| RF  | MM | ADASYN | RF__class_weight : balanced; RF__criterion : log_loss;<br>RF__max_depth : 1; RF__max_features : 1;<br>RF__min_samples_leaf : 20; RF__n_estimators : 1000;<br>RF__random_state : 0          | 0.691 | 0.733 |
| RF  | MM | ADASYN | RF__class_weight : balanced; RF__criterion : log_loss;<br>RF__max_depth : 1; RF__max_features : 1;<br>RF__min_samples_leaf : 20; RF__n_estimators : 1000;<br>RF__random_state : 66         | 0.691 | 0.734 |
| RF  | SS | ADASYN | RF__class_weight : None; RF__criterion : log_loss;<br>RF__max_depth : 2; RF__max_features : 1;<br>RF__min_samples_leaf : 1; RF__n_estimators : 948;<br>RF__random_state : 19               | 0.691 | 0.751 |
| RF  | SS | ADASYN | RF__class_weight : balanced; RF__criterion : log_loss;<br>RF__max_depth : 2; RF__max_features : 1;<br>RF__min_samples_leaf : 1; RF__n_estimators : 318;<br>RF__random_state : 4            | 0.691 | 0.749 |
| RF  | MM | ADASYN | RF__class_weight : None; RF__criterion : log_loss;<br>RF__max_depth : 1; RF__max_features : 1;<br>RF__min_samples_leaf : 20; RF__n_estimators : 1000;<br>RF__random_state : 0              | 0.691 | 0.733 |
| XGB | MM | ROS    | XGB__alpha : 6.736731598955543;<br>XGB__colsample_bytree : 1.0; XGB__gamma : 0.1;<br>XGB__max_depth : 1; XGB__min_child_weight : 0.0;                                                      | 0.690 | 0.784 |

|     |          |          |                                                                                                                                                                                                                                                        |       |       |
|-----|----------|----------|--------------------------------------------------------------------------------------------------------------------------------------------------------------------------------------------------------------------------------------------------------|-------|-------|
|     |          |          | XGB__random_state : 0; XGB__scale_pos_weight : 2.0;<br>XGB__subsample : 0.5683523934852948                                                                                                                                                             |       |       |
| RF  | MM       | SMOTE    | RF__class_weight : balanced; RF__criterion : log_loss;<br>RF__max_depth : 2; RF__max_features : 1;<br>RF__min_samples_leaf : 20; RF__n_estimators : 300;<br>RF__random_state : 0                                                                       | 0.690 | 0.747 |
| XGB | MM       | ROS      | XGB__alpha : 5.0; XGB__colsample_bytree : 1.0;<br>XGB__gamma : 0.1; XGB__max_depth : 1;<br>XGB__min_child_weight : 0.0; XGB__random_state :<br>0; XGB__scale_pos_weight : 1.2466252209930042;<br>XGB__subsample : 0.6572627607827732                   | 0.689 | 0.793 |
| RF  | SS       | ADASYN   | RF__class_weight : balanced; RF__criterion : log_loss;<br>RF__max_depth : 2; RF__max_features : 1;<br>RF__min_samples_leaf : 20; RF__n_estimators : 786;<br>RF__random_state : 96                                                                      | 0.688 | 0.745 |
| RF  | Not used | Not used | RF__class_weight : balanced; RF__criterion : log_loss;<br>RF__max_depth : 5;<br>RF__max_features : 1; RF__min_samples_leaf : 19;<br>RF__n_estimators : 989; RF__random_state : 51                                                                      | 0.688 | 0.778 |
| XGB | SS       | ROS      | XGB__alpha : 5.0; XGB__colsample_bytree : 1.0;<br>XGB__gamma : 0.1; XGB__max_depth : 1;<br>XGB__min_child_weight : 2.6508430705940436;<br>XGB__random_state : 0; XGB__scale_pos_weight :<br>1.7600297028732244; XGB__subsample :<br>0.6639870852284843 | 0.688 | 0.801 |
| XGB | SS       | ROS      | XGB__alpha : 5.0; XGB__colsample_bytree : 1.0;<br>XGB__gamma : 1.7708138324740335;<br>XGB__max_depth : 1; XGB__min_child_weight :<br>6.129595945684825; XGB__random_state : 0;<br>XGB__scale_pos_weight : 2.0; XGB__subsample :<br>0.6861739509061591  | 0.688 | 0.782 |

|     |          |          |                                                                                                                                                                                                                                                                     |       |       |
|-----|----------|----------|---------------------------------------------------------------------------------------------------------------------------------------------------------------------------------------------------------------------------------------------------------------------|-------|-------|
| NN  | SS       | ADASYN   | NN__activation : relu; NN__alpha : 3.9814946105106603; NN__hidden_layer_sizes : 15; NN__max_iter : 427; NN__random_state : 0; NN__solver : adam                                                                                                                     | 0.687 | 0.759 |
| RF  | Not used | Not used | RF__class_weight : None; RF__criterion : log_loss; RF__max_depth : 3; RF__max_features : 1; RF__min_samples_leaf : 20; RF__n_estimators : 498; RF__random_state : 59                                                                                                | 0.687 | 0.768 |
| NN  | SS       | ADASYN   | NN__activation : identity; NN__alpha : 10.0; NN__hidden_layer_sizes : 50; NN__max_iter : 500; NN__random_state : 0; NN__solver : lbfgs                                                                                                                              | 0.687 | 0.731 |
| NN  | SS       | ADASYN   | NN__activation : tanh; NN__alpha : 10.0; NN__hidden_layer_sizes : 3; NN__max_iter : 500; NN__random_state : 0; NN__solver : lbfgs                                                                                                                                   | 0.687 | 0.750 |
| NN  | SS       | ADASYN   | NN__activation : identity; NN__alpha : 10.0; NN__hidden_layer_sizes : 3; NN__max_iter : 50; NN__random_state : 0; NN__solver : lbfgs                                                                                                                                | 0.687 | 0.731 |
| XGB | MM       | ROS      | XGB__alpha : 10.196467921170566; XGB__colsample_bytree : 0.9886694173809806; XGB__gamma : 0.1; XGB__max_depth : 1; XGB__min_child_weight : 2.1234978311208788; XGB__random_state : 0; XGB__scale_pos_weight : 1.51260621923905; XGB__subsample : 0.5764970291109225 | 0.686 | 0.752 |
| XGB | SS       | ROS      | XGB__alpha : 10.196467921170566; XGB__colsample_bytree : 0.9886694173809806; XGB__gamma : 0.1; XGB__max_depth : 1; XGB__min_child_weight : 2.1234978311208788; XGB__random_state : 0; XGB__scale_pos_weight : 1.51260621923905; XGB__subsample : 0.5764970291109225 | 0.686 | 0.752 |

|     |    |        |                                                                                                                                                                                                                                                                     |       |       |
|-----|----|--------|---------------------------------------------------------------------------------------------------------------------------------------------------------------------------------------------------------------------------------------------------------------------|-------|-------|
| XGB | SS | ROS    | XGB__alpha : 5.0; XGB__colsample_bytree : 0.5;<br>XGB__gamma : 1.8126757958675883;<br>XGB__max_depth : 3; XGB__min_child_weight :<br>33.456795387334914; XGB__random_state : 0;<br>XGB__scale_pos_weight : 2.0; XGB__subsample : 0.7                                | 0.686 | 0.735 |
| XGB | SS | ROS    | XGB__alpha : 5.0; XGB__colsample_bytree : 0.5;<br>XGB__gamma : 0.1; XGB__max_depth : 1;<br>XGB__min_child_weight : 0.0; XGB__random_state :<br>0; XGB__scale_pos_weight : 1.357126240220297;<br>XGB__subsample : 0.5                                                | 0.685 | 0.779 |
| RF  | SS | ROS    | RF__class_weight : None; RF__criterion : gini;<br>RF__max_depth : 3; RF__max_features : 1;<br>RF__min_samples_leaf : 15; RF__n_estimators : 884;<br>RF__random_state : 3                                                                                            | 0.685 | 0.788 |
| XGB | SS | ROS    | XGB__alpha : 5.0; XGB__colsample_bytree : 1.0;<br>XGB__gamma : 2.172424617631541;<br>XGB__max_depth : 1; XGB__min_child_weight : 0.0;<br>XGB__random_state : 0; XGB__scale_pos_weight : 2.0;<br>XGB__subsample : 0.5                                                | 0.684 | 0.775 |
| XGB | MM | ROS    | XGB__alpha : 5.0; XGB__colsample_bytree :<br>0.506144547889209; XGB__gamma : 0.1;<br>XGB__max_depth : 1; XGB__min_child_weight :<br>5.489585305776787; XGB__random_state : 0;<br>XGB__scale_pos_weight : 0.9252207496952428;<br>XGB__subsample : 0.6790194588564726 | 0.684 | 0.773 |
| NN  | SS | ADASYN | NN__activation : identity; NN__alpha :<br>0.007217166401724121; NN__hidden_layer_sizes : 50;<br>NN__max_iter : 500; NN__random_state : 0;<br>NN__solver : adam                                                                                                      | 0.683 | 0.729 |
| XGB | MM | ROS    | XGB__alpha : 5.0; XGB__colsample_bytree : 1.0;<br>XGB__gamma : 0.1; XGB__max_depth : 2;                                                                                                                                                                             | 0.683 | 0.811 |

|     |    |        |                                                                                                                                                                                                                                                        |       |       |
|-----|----|--------|--------------------------------------------------------------------------------------------------------------------------------------------------------------------------------------------------------------------------------------------------------|-------|-------|
|     |    |        | XGB__min_child_weight : 0.0; XGB__random_state : 0; XGB__scale_pos_weight : 0.5; XGB__subsample : 0.5                                                                                                                                                  |       |       |
| NN  | SS | ADASYN | NN__activation : identity; NN__alpha : 0.0001; NN__hidden_layer_sizes : 50; NN__max_iter : 500; NN__random_state : 0; NN__solver : adam                                                                                                                | 0.683 | 0.729 |
| XGB | MM | ROS    | XGB__alpha : 5.0; XGB__colsample_bytree : 0.6137575243734916; XGB__gamma : 1.0480605164386632; XGB__max_depth : 1; XGB__min_child_weight : 0.0; XGB__random_state : 0; XGB__scale_pos_weight : 1.8795444638284153; XGB__subsample : 0.6574296775410922 | 0.682 | 0.782 |
| XGB | SS | ROS    | XGB__alpha : 5.0; XGB__colsample_bytree : 0.6137575243734916; XGB__gamma : 1.0480605164386632; XGB__max_depth : 1; XGB__min_child_weight : 0.0; XGB__random_state : 0; XGB__scale_pos_weight : 1.8795444638284153; XGB__subsample : 0.6574296775410922 | 0.682 | 0.782 |
| NN  | SS | ADASYN | NN__activation : identity; NN__alpha : 1.2278635248432284; NN__hidden_layer_sizes : 27; NN__max_iter : 165; NN__random_state : 0; NN__solver : adam                                                                                                    | 0.682 | 0.730 |
| XGB | SS | ROS    | XGB__alpha : 5.0; XGB__colsample_bytree : 0.5264851861390412; XGB__gamma : 0.1; XGB__max_depth : 3; XGB__min_child_weight : 0.0; XGB__random_state : 0; XGB__scale_pos_weight : 2.0; XGB__subsample : 0.548684309541424                                | 0.682 | 0.883 |
| NN  | SS | ADASYN | NN__activation : identity; NN__alpha : 0.018123696732686986; NN__hidden_layer_sizes : 50; NN__max_iter : 500; NN__random_state : 0; NN__solver : lbfgs                                                                                                 | 0.682 | 0.730 |

|     |    |     |                                                                                                                                                                                                                                                      |       |       |
|-----|----|-----|------------------------------------------------------------------------------------------------------------------------------------------------------------------------------------------------------------------------------------------------------|-------|-------|
| XGB | MM | ROS | XGB__alpha : 5.0; XGB__colsample_bytree : 0.5;<br>XGB__gamma : 0.1; XGB__max_depth : 1;<br>XGB__min_child_weight : 19.290799090180425;<br>XGB__random_state : 0; XGB__scale_pos_weight : 2.0;<br>XGB__subsample : 0.7                                | 0.681 | 0.766 |
| XGB | MM | ROS | XGB__alpha : 5.0; XGB__colsample_bytree : 1.0;<br>XGB__gamma : 0.1; XGB__max_depth : 1;<br>XGB__min_child_weight : 0.0; XGB__random_state :<br>0; XGB__scale_pos_weight : 0.5; XGB__subsample :<br>0.5                                               | 0.681 | 0.757 |
| XGB | SS | ROS | XGB__alpha : 5.0; XGB__colsample_bytree : 1.0;<br>XGB__gamma : 0.1; XGB__max_depth : 1;<br>XGB__min_child_weight : 0.0; XGB__random_state :<br>0; XGB__scale_pos_weight : 0.5; XGB__subsample :<br>0.5                                               | 0.681 | 0.757 |
| XGB | MM | ROS | XGB__alpha : 5.0; XGB__colsample_bytree : 1.0;<br>XGB__gamma : 1.8175464993510824;<br>XGB__max_depth : 1; XGB__min_child_weight :<br>6.730562755006236; XGB__random_state : 0;<br>XGB__scale_pos_weight : 2.0; XGB__subsample :<br>0.685323541161032 | 0.681 | 0.779 |
| XGB | MM | ROS | XGB__alpha : 5.0; XGB__colsample_bytree : 1.0;<br>XGB__gamma : 0.1; XGB__max_depth : 1;<br>XGB__min_child_weight : 16.959304006574122;<br>XGB__random_state : 0; XGB__scale_pos_weight :<br>1.3722225232484302; XGB__subsample : 0.5                 | 0.681 | 0.757 |
| RF  | SS | ROS | RF__class_weight : balanced_subsample;<br>RF__criterion : log_loss; RF__max_depth : 5;<br>RF__max_features : 1; RF__min_samples_leaf : 13;<br>RF__n_estimators : 816; RF__random_state : 0                                                           | 0.681 | 0.821 |

|     |    |     |                                                                                                                                                                                                                                                       |       |       |
|-----|----|-----|-------------------------------------------------------------------------------------------------------------------------------------------------------------------------------------------------------------------------------------------------------|-------|-------|
| XGB | MM | ROS | XGB__alpha : 5.0; XGB__colsample_bytree : 1.0;<br>XGB__gamma : 0.1; XGB__max_depth : 1;<br>XGB__min_child_weight : 12.346475001805546;<br>XGB__random_state : 0; XGB__scale_pos_weight : 0.5;<br>XGB__subsample : 0.5                                 | 0.681 | 0.736 |
| RF  | SS | ROS | RF__class_weight : None; RF__criterion : log_loss;<br>RF__max_depth : 3; RF__max_features : 2;<br>RF__min_samples_leaf : 18; RF__n_estimators : 301;<br>RF__random_state : 8                                                                          | 0.680 | 0.792 |
| XGB | SS | ROS | XGB__alpha : 5.0; XGB__colsample_bytree : 0.5;<br>XGB__gamma : 1.0666493712918015;<br>XGB__max_depth : 3; XGB__min_child_weight :<br>31.63515870320992; XGB__random_state : 0;<br>XGB__scale_pos_weight : 2.0; XGB__subsample :<br>0.6598505460869761 | 0.680 | 0.737 |
| XGB | MM | ROS | XGB__alpha : 5.0; XGB__colsample_bytree :<br>0.5264851861390412; XGB__gamma : 0.1;<br>XGB__max_depth : 3; XGB__min_child_weight : 0.0;<br>XGB__random_state : 0; XGB__scale_pos_weight : 2.0;<br>XGB__subsample : 0.548684309541424                   | 0.680 | 0.883 |
| XGB | MM | ROS | XGB__alpha : 5.0; XGB__colsample_bytree : 0.5;<br>XGB__gamma : 0.1; XGB__max_depth : 2;<br>XGB__min_child_weight : 0.0; XGB__random_state :<br>0; XGB__scale_pos_weight : 0.5; XGB__subsample :<br>0.7                                                | 0.680 | 0.802 |
| XGB | SS | ROS | XGB__alpha : 5.0; XGB__colsample_bytree : 0.5;<br>XGB__gamma : 0.1; XGB__max_depth : 2;<br>XGB__min_child_weight : 0.0; XGB__random_state :<br>0; XGB__scale_pos_weight : 0.5; XGB__subsample :<br>0.7                                                | 0.680 | 0.802 |

|     |    |        |                                                                                                                                                                                                                                    |       |       |
|-----|----|--------|------------------------------------------------------------------------------------------------------------------------------------------------------------------------------------------------------------------------------------|-------|-------|
| XGB | SS | ROS    | XGB__alpha : 7.49790102877007;<br>XGB__colsample_bytree : 0.5; XGB__gamma : 0.1;<br>XGB__max_depth : 3; XGB__min_child_weight :<br>34.148554160929955; XGB__random_state : 0;<br>XGB__scale_pos_weight : 2.0; XGB__subsample : 0.7 | 0.680 | 0.737 |
| RF  | SS | ROS    | RF__class_weight : balanced_subsample;<br>RF__criterion : gini; RF__max_depth : 5;<br>RF__max_features : 1; RF__min_samples_leaf : 14;<br>RF__n_estimators : 631; RF__random_state : 35                                            | 0.678 | 0.818 |
| NN  | SS | ADASYN | NN__activation : relu; NN__alpha :<br>4.975636992427353; NN__hidden_layer_sizes : 6;<br>NN__max_iter : 135; NN__random_state : 0;<br>NN__solver : adam                                                                             | 0.678 | 0.721 |
| RF  | SS | ADASYN | RF__class_weight : None; RF__criterion : gini;<br>RF__max_depth : 2; RF__max_features : 1;<br>RF__min_samples_leaf : 1; RF__n_estimators : 556;<br>RF__random_state : 91                                                           | 0.678 | 0.748 |
| RF  | SS | ROS    | RF__class_weight : balanced_subsample;<br>RF__criterion : log_loss; RF__max_depth : 1;<br>RF__max_features : 2; RF__min_samples_leaf : 16;<br>RF__n_estimators : 388; RF__random_state : 0                                         | 0.677 | 0.751 |
| XGB | SS | ROS    | XGB__alpha : 5.0; XGB__colsample_bytree : 0.5;<br>XGB__gamma : 0.1; XGB__max_depth : 2;<br>XGB__min_child_weight : 31.393426240369433;<br>XGB__random_state : 0; XGB__scale_pos_weight : 2.0;<br>XGB__subsample : 0.7              | 0.677 | 0.752 |
| XGB | SS | ROS    | XGB__alpha : 5.0; XGB__colsample_bytree :<br>0.5761956329403548; XGB__gamma :<br>2.5886922507410484; XGB__max_depth : 1;<br>XGB__min_child_weight : 4.903091367772631;                                                             | 0.676 | 0.767 |



|     |    |     |                                                                                                                                                                                                                                                        |       |       |
|-----|----|-----|--------------------------------------------------------------------------------------------------------------------------------------------------------------------------------------------------------------------------------------------------------|-------|-------|
|     |    |     | XGB__random_state : 0; XGB__scale_pos_weight : 2.0;<br>XGB__subsample : 0.7                                                                                                                                                                            |       |       |
| RF  | SS | ROS | RF__class_weight : None; RF__criterion : log_loss;<br>RF__max_depth : 3; RF__max_features : 2;<br>RF__min_samples_leaf : 19; RF__n_estimators : 316;<br>RF__random_state : 99                                                                          | 0.676 | 0.793 |
| XGB | MM | ROS | XGB__alpha : 5.0; XGB__colsample_bytree : 1.0;<br>XGB__gamma : 0.1; XGB__max_depth : 3;<br>XGB__min_child_weight : 0.0; XGB__random_state :<br>0; XGB__scale_pos_weight : 0.5; XGB__subsample :<br>0.7                                                 | 0.675 | 0.854 |
| XGB | SS | ROS | XGB__alpha : 5.0; XGB__colsample_bytree : 0.5;<br>XGB__gamma : 2.141520841440125;<br>XGB__max_depth : 3; XGB__min_child_weight :<br>28.081509474612222; XGB__random_state : 0;<br>XGB__scale_pos_weight : 1.439334349509644;<br>XGB__subsample : 0.7   | 0.674 | 0.736 |
| RF  | SS | ROS | RF__class_weight : balanced_subsample;<br>RF__criterion : log_loss; RF__max_depth : 3;<br>RF__max_features : 8; RF__min_samples_leaf : 3;<br>RF__n_estimators : 319; RF__random_state : 57                                                             | 0.673 | 0.803 |
| XGB | SS | ROS | XGB__alpha : 5.0; XGB__colsample_bytree : 0.5;<br>XGB__gamma : 1.7921422540006477;<br>XGB__max_depth : 1; XGB__min_child_weight :<br>24.999870613602848; XGB__random_state : 0;<br>XGB__scale_pos_weight : 1.3750951624475025;<br>XGB__subsample : 0.7 | 0.673 | 0.736 |
| XGB | MM | ROS | XGB__alpha : 5.0; XGB__colsample_bytree : 0.5;<br>XGB__gamma : 0.1; XGB__max_depth : 1;<br>XGB__min_child_weight : 11.636445258318036;                                                                                                                 | 0.673 | 0.743 |

|     |    |        |                                                                                                                                                                                                                                                       |       |       |
|-----|----|--------|-------------------------------------------------------------------------------------------------------------------------------------------------------------------------------------------------------------------------------------------------------|-------|-------|
|     |    |        | XGB__random_state : 0; XGB__scale_pos_weight :<br>0.7371732942300812; XGB__subsample : 0.5                                                                                                                                                            |       |       |
| RF  | SS | ADASYN | RF__class_weight : balanced; RF__criterion : log_loss;<br>RF__max_depth : 3; RF__max_features : 1;<br>RF__min_samples_leaf : 20; RF__n_estimators : 785;<br>RF__random_state : 3                                                                      | 0.672 | 0.756 |
| RF  | SS | ROS    | RF__class_weight : balanced_subsample;<br>RF__criterion : log_loss; RF__max_depth : 5;<br>RF__max_features : 1; RF__min_samples_leaf : 10;<br>RF__n_estimators : 419; RF__random_state : 95                                                           | 0.672 | 0.834 |
| XGB | SS | ROS    | XGB__alpha : 5.0; XGB__colsample_bytree : 1.0;<br>XGB__gamma : 0.1; XGB__max_depth : 1;<br>XGB__min_child_weight : 6.017884701612123;<br>XGB__random_state : 0; XGB__scale_pos_weight :<br>0.8526671439629193; XGB__subsample :<br>0.6652042584846335 | 0.672 | 0.774 |
| XGB | MM | ROS    | XGB__alpha : 5.0; XGB__colsample_bytree : 1.0;<br>XGB__gamma : 0.1; XGB__max_depth : 2;<br>XGB__min_child_weight : 14.511089713118544;<br>XGB__random_state : 0; XGB__scale_pos_weight : 0.5;<br>XGB__subsample : 0.5                                 | 0.672 | 0.729 |
| XGB | MM | ROS    | XGB__alpha : 5.0; XGB__colsample_bytree : 1.0;<br>XGB__gamma : 0.1; XGB__max_depth : 1;<br>XGB__min_child_weight : 22.67687517959803;<br>XGB__random_state : 0; XGB__scale_pos_weight :<br>1.898323576719728; XGB__subsample :<br>0.6050331960216304  | 0.670 | 0.764 |
| XGB | MM | ROS    | XGB__alpha : 12.332686906518637;<br>XGB__colsample_bytree : 1.0; XGB__gamma : 0.1;<br>XGB__max_depth : 1; XGB__min_child_weight : 0.0;                                                                                                                | 0.670 | 0.751 |

|     |    |     |                                                                                                                                                                                                                                                                       |       |       |
|-----|----|-----|-----------------------------------------------------------------------------------------------------------------------------------------------------------------------------------------------------------------------------------------------------------------------|-------|-------|
|     |    |     | XGB__random_state : 0; XGB__scale_pos_weight : 2.0;<br>XGB__subsample : 0.7                                                                                                                                                                                           |       |       |
| XGB | MM | ROS | XGB__alpha : 5.0; XGB__colsample_bytree :<br>0.6538029761263292; XGB__gamma :<br>2.8505742334704736; XGB__max_depth : 2;<br>XGB__min_child_weight : 1.2646515564067446;<br>XGB__random_state : 0; XGB__scale_pos_weight : 2.0;<br>XGB__subsample : 0.5678974858815471 | 0.670 | 0.803 |
| XGB | SS | ROS | XGB__alpha : 5.0; XGB__colsample_bytree :<br>0.6538029761263292; XGB__gamma :<br>2.8505742334704736; XGB__max_depth : 2;<br>XGB__min_child_weight : 1.2646515564067446;<br>XGB__random_state : 0; XGB__scale_pos_weight : 2.0;<br>XGB__subsample : 0.5678974858815471 | 0.670 | 0.803 |
| XGB | MM | ROS | XGB__alpha : 5.0; XGB__colsample_bytree : 0.5;<br>XGB__gamma : 0.1; XGB__max_depth : 1;<br>XGB__min_child_weight : 23.0607397237513;<br>XGB__random_state : 0; XGB__scale_pos_weight :<br>1.5561233626845743; XGB__subsample : 0.7                                    | 0.670 | 0.755 |
| RF  | SS | ROS | RF__class_weight : balanced; RF__criterion : log_loss;<br>RF__max_depth : 1; RF__max_features : 2;<br>RF__min_samples_leaf : 3; RF__n_estimators : 967;<br>RF__random_state : 100                                                                                     | 0.670 | 0.750 |
| XGB | MM | ROS | XGB__alpha : 5.0; XGB__colsample_bytree :<br>0.9119313619721247; XGB__gamma : 5.0;<br>XGB__max_depth : 1; XGB__min_child_weight : 0.0;<br>XGB__random_state : 0; XGB__scale_pos_weight :<br>1.5857510275143625; XGB__subsample :<br>0.524570237808505                 | 0.670 | 0.745 |
| XGB | SS | ROS | XGB__alpha : 5.0; XGB__colsample_bytree :<br>0.9119313619721247; XGB__gamma : 5.0;                                                                                                                                                                                    | 0.670 | 0.745 |

|     |    |       |                                                                                                                                                                                                                                                       |       |       |
|-----|----|-------|-------------------------------------------------------------------------------------------------------------------------------------------------------------------------------------------------------------------------------------------------------|-------|-------|
|     |    |       | XGB__max_depth : 1; XGB__min_child_weight : 0.0;<br>XGB__random_state : 0; XGB__scale_pos_weight :<br>1.5857510275143625; XGB__subsample :<br>0.524570237808505                                                                                       |       |       |
| XGB | MM | ROS   | XGB__alpha : 5.0; XGB__colsample_bytree : 1.0;<br>XGB__gamma : 0.4369554525516144;<br>XGB__max_depth : 1; XGB__min_child_weight :<br>7.926369719218964; XGB__random_state : 0;<br>XGB__scale_pos_weight : 2.0; XGB__subsample :<br>0.5639962547360536 | 0.670 | 0.784 |
| XGB | SS | ROS   | XGB__alpha : 5.0; XGB__colsample_bytree : 1.0;<br>XGB__gamma : 0.4369554525516144;<br>XGB__max_depth : 1; XGB__min_child_weight :<br>7.926369719218964; XGB__random_state : 0;<br>XGB__scale_pos_weight : 2.0; XGB__subsample :<br>0.5639962547360536 | 0.670 | 0.784 |
| RF  | MM | SMOTE | RF__class_weight : balanced_subsample;<br>RF__criterion : log_loss; RF__max_depth : 3;<br>RF__max_features : 1; RF__min_samples_leaf : 3;<br>RF__n_estimators : 996; RF__random_state : 70                                                            | 0.670 | 0.773 |
| XGB | SS | ROS   | XGB__alpha : 5.0; XGB__colsample_bytree : 0.5;<br>XGB__gamma : 1.226685331044141;<br>XGB__max_depth : 3; XGB__min_child_weight :<br>22.058917704386314; XGB__random_state : 0;<br>XGB__scale_pos_weight : 0.911982562205536;<br>XGB__subsample : 0.7  | 0.669 | 0.734 |
| XGB | SS | ROS   | XGB__alpha : 5.0; XGB__colsample_bytree : 1.0;<br>XGB__gamma : 3.92704707848348; XGB__max_depth :<br>1; XGB__min_child_weight : 0.0;<br>XGB__random_state : 0; XGB__scale_pos_weight : 2.0;<br>XGB__subsample : 0.602559348046943                     | 0.669 | 0.758 |

|     |    |     |                                                                                                                                                                                                                                                                       |       |       |
|-----|----|-----|-----------------------------------------------------------------------------------------------------------------------------------------------------------------------------------------------------------------------------------------------------------------------|-------|-------|
| XGB | MM | ROS | XGB__alpha : 5.0; XGB__colsample_bytree : 1.0;<br>XGB__gamma : 1.1973981523302588;<br>XGB__max_depth : 1; XGB__min_child_weight :<br>9.694469483369145; XGB__random_state : 0;<br>XGB__scale_pos_weight : 1.1589710443262158;<br>XGB__subsample : 0.658457542891933   | 0.669 | 0.759 |
| XGB | SS | ROS | XGB__alpha : 5.0; XGB__colsample_bytree : 0.5;<br>XGB__gamma : 0.1; XGB__max_depth : 3;<br>XGB__min_child_weight : 11.923206352594525;<br>XGB__random_state : 0; XGB__scale_pos_weight : 0.5;<br>XGB__subsample : 0.5                                                 | 0.669 | 0.736 |
| XGB | SS | ROS | XGB__alpha : 5.0; XGB__colsample_bytree : 1.0;<br>XGB__gamma : 1.2188283259997827;<br>XGB__max_depth : 1; XGB__min_child_weight : 0.0;<br>XGB__random_state : 0; XGB__scale_pos_weight :<br>0.6629510777554158; XGB__subsample :<br>0.691576002874868                 | 0.668 | 0.752 |
| XGB | MM | ROS | XGB__alpha : 5.0; XGB__colsample_bytree : 0.5;<br>XGB__gamma : 0.1; XGB__max_depth : 3;<br>XGB__min_child_weight : 20.278432134750943;<br>XGB__random_state : 0; XGB__scale_pos_weight :<br>1.3289463000278767; XGB__subsample :<br>0.6968010272900145                | 0.668 | 0.779 |
| XGB | SS | ROS | XGB__alpha : 13.346965365279308;<br>XGB__colsample_bytree : 0.6968270208547013;<br>XGB__gamma : 0.1; XGB__max_depth : 2;<br>XGB__min_child_weight : 1.7044619025655332;<br>XGB__random_state : 0; XGB__scale_pos_weight :<br>1.4121959210449408; XGB__subsample : 0.7 | 0.667 | 0.776 |
| XGB | SS | ROS | XGB__alpha : 9.647185441645753;<br>XGB__colsample_bytree : 0.7465821334427631;                                                                                                                                                                                        | 0.667 | 0.798 |

|     |    |        |                                                                                                                                                                                                                                                                       |       |       |
|-----|----|--------|-----------------------------------------------------------------------------------------------------------------------------------------------------------------------------------------------------------------------------------------------------------------------|-------|-------|
|     |    |        | XGB__gamma : 0.4601545702046056;<br>XGB__max_depth : 2; XGB__min_child_weight : 0.0;<br>XGB__random_state : 0; XGB__scale_pos_weight :<br>1.6683458493066796; XGB__subsample :<br>0.5570264201746168                                                                  |       |       |
| XGB | SS | ROS    | XGB__alpha : 5.0; XGB__colsample_bytree : 0.5;<br>XGB__gamma : 1.509591831962534;<br>XGB__max_depth : 1; XGB__min_child_weight :<br>23.544745552216703; XGB__random_state : 0;<br>XGB__scale_pos_weight : 2.0; XGB__subsample :<br>0.6730909602391604                 | 0.667 | 0.749 |
| XGB | SS | ROS    | XGB__alpha : 10.452985867505967;<br>XGB__colsample_bytree : 0.8855336186336551;<br>XGB__gamma : 0.1; XGB__max_depth : 1;<br>XGB__min_child_weight : 11.750196922419978;<br>XGB__random_state : 0; XGB__scale_pos_weight :<br>1.8323867141985335; XGB__subsample : 0.7 | 0.667 | 0.748 |
| RF  | SS | ADASYN | RF__class_weight : balanced_subsample;<br>RF__criterion : log_loss; RF__max_depth : 3;<br>RF__max_features : 1; RF__min_samples_leaf : 1;<br>RF__n_estimators : 940; RF__random_state : 100                                                                           | 0.667 | 0.773 |
| RF  | MM | SMOTE  | RF__class_weight : balanced_subsample;<br>RF__criterion : gini; RF__max_depth : 2;<br>RF__max_features : 1; RF__min_samples_leaf : 16;<br>RF__n_estimators : 301; RF__random_state : 64                                                                               | 0.664 | 0.747 |
| XGB | SS | SMOTE  | XGB__alpha : 5.0; XGB__colsample_bytree : 0.5;<br>XGB__gamma : 0.1; XGB__max_depth : 3;<br>XGB__min_child_weight : 35.003002308269586;<br>XGB__random_state : 0; XGB__scale_pos_weight :<br>1.8013071864082288; XGB__subsample : 0.5                                  | 0.661 | 0.700 |

|     |    |        |                                                                                                                                                                                                                                        |       |       |
|-----|----|--------|----------------------------------------------------------------------------------------------------------------------------------------------------------------------------------------------------------------------------------------|-------|-------|
| XGB | MM | ADASYN | XGB__alpha : 5.0; XGB__colsample_bytree : 0.5104339708965451; XGB__gamma : 0.1; XGB__max_depth : 1; XGB__min_child_weight : 27.817712445384885; XGB__random_state : 0; XGB__scale_pos_weight : 1.504939050328973; XGB__subsample : 0.5 | 0.661 | 0.712 |
| RF  | MM | SMOTE  | RF__class_weight : balanced_subsample; RF__criterion : log_loss; RF__max_depth : 1; RF__max_features : 2; RF__min_samples_leaf : 18; RF__n_estimators : 1000; RF__random_state : 9                                                     | 0.660 | 0.727 |
| XGB | MM | SMOTE  | XGB__alpha : 5.0; XGB__colsample_bytree : 0.6762765744583707; XGB__gamma : 0.1; XGB__max_depth : 1; XGB__min_child_weight : 44.87118231447129; XGB__random_state : 0; XGB__scale_pos_weight : 2.0; XGB__subsample : 0.5                | 0.659 | 0.668 |
| XGB | SS | ADASYN | XGB__alpha : 5.0; XGB__colsample_bytree : 0.5649231703666495; XGB__gamma : 0.1; XGB__max_depth : 1; XGB__min_child_weight : 44.073078378318876; XGB__random_state : 0; XGB__scale_pos_weight : 2.0; XGB__subsample : 0.5               | 0.659 | 0.676 |
| RF  | SS | ADASYN | RF__class_weight : balanced_subsample; RF__criterion : log_loss; RF__max_depth : 2; RF__max_features : 3; RF__min_samples_leaf : 11; RF__n_estimators : 470; RF__random_state : 46                                                     | 0.659 | 0.731 |
| XGB | SS | SMOTE  | XGB__alpha : 5.0; XGB__colsample_bytree : 0.9789335516015518; XGB__gamma : 0.1; XGB__max_depth : 3; XGB__min_child_weight : 39.859630761960524; XGB__random_state : 0; XGB__scale_pos_weight : 2.0; XGB__subsample : 0.545659146018476 | 0.658 | 0.701 |

|     |    |        |                                                                                                                                                                                                                                                        |       |       |
|-----|----|--------|--------------------------------------------------------------------------------------------------------------------------------------------------------------------------------------------------------------------------------------------------------|-------|-------|
| XGB | MM | ADASYN | XGB__alpha : 5.0; XGB__colsample_bytree : 0.9734046446248774; XGB__gamma : 0.1; XGB__max_depth : 3; XGB__min_child_weight : 23.547388620693035; XGB__random_state : 0; XGB__scale_pos_weight : 1.085450149082817; XGB__subsample : 0.5                 | 0.657 | 0.713 |
| XGB | SS | SMOTE  | XGB__alpha : 5.0; XGB__colsample_bytree : 0.9341088008697684; XGB__gamma : 0.1; XGB__max_depth : 3; XGB__min_child_weight : 36.152884553633484; XGB__random_state : 0; XGB__scale_pos_weight : 1.6713008400273912; XGB__subsample : 0.5668252749427178 | 0.657 | 0.708 |
| XGB | SS | SMOTE  | XGB__alpha : 5.0; XGB__colsample_bytree : 1.0; XGB__gamma : 0.1; XGB__max_depth : 3; XGB__min_child_weight : 32.21546743766196; XGB__random_state : 0; XGB__scale_pos_weight : 2.0; XGB__subsample : 0.5                                               | 0.657 | 0.714 |
| XGB | MM | ADASYN | XGB__alpha : 5.0; XGB__colsample_bytree : 0.9990891826903692; XGB__gamma : 0.1; XGB__max_depth : 1; XGB__min_child_weight : 28.246617231301364; XGB__random_state : 0; XGB__scale_pos_weight : 1.500494338720833; XGB__subsample : 0.5                 | 0.657 | 0.712 |
| XGB | SS | ADASYN | XGB__alpha : 5.0; XGB__colsample_bytree : 0.5; XGB__gamma : 0.1; XGB__max_depth : 3; XGB__min_child_weight : 42.128635004400024; XGB__random_state : 0; XGB__scale_pos_weight : 2.0; XGB__subsample : 0.5503763311789271                               | 0.656 | 0.692 |
| XGB | MM | SMOTE  | XGB__alpha : 5.0; XGB__colsample_bytree : 0.6601994598267135; XGB__gamma : 0.1; XGB__max_depth : 2; XGB__min_child_weight :                                                                                                                            | 0.656 | 0.721 |



|     |    |        |                                                                                                                                                                                                                                                       |       |       |
|-----|----|--------|-------------------------------------------------------------------------------------------------------------------------------------------------------------------------------------------------------------------------------------------------------|-------|-------|
|     |    |        | 35.92187611818295; XGB__random_state : 0;<br>XGB__scale_pos_weight : 2.0; XGB__subsample :<br>0.646670269530334                                                                                                                                       |       |       |
| XGB | SS | ADASYN | XGB__alpha : 5.0; XGB__colsample_bytree : 0.5;<br>XGB__gamma : 3.8043174298483264;<br>XGB__max_depth : 2; XGB__min_child_weight :<br>42.07988040296253; XGB__random_state : 0;<br>XGB__scale_pos_weight : 2.0; XGB__subsample :<br>0.5590780031877133 | 0.656 | 0.693 |
| XGB | SS | SMOTE  | XGB__alpha : 10.256439322046969;<br>XGB__colsample_bytree : 0.6222933045266974;<br>XGB__gamma : 0.1; XGB__max_depth : 3;<br>XGB__min_child_weight : 34.64134775717527;<br>XGB__random_state : 0; XGB__scale_pos_weight : 2.0;<br>XGB__subsample : 0.7 | 0.656 | 0.723 |
| XGB | SS | SMOTE  | XGB__alpha : 5.0; XGB__colsample_bytree :<br>0.5341509310357867; XGB__gamma : 0.1;<br>XGB__max_depth : 2; XGB__min_child_weight :<br>35.85043621647163; XGB__random_state : 0;<br>XGB__scale_pos_weight : 1.7891482660132831;<br>XGB__subsample : 0.5 | 0.656 | 0.696 |
| XGB | SS | SMOTE  | XGB__alpha : 5.0; XGB__colsample_bytree :<br>0.8146986602557749; XGB__gamma : 0.1;<br>XGB__max_depth : 2; XGB__min_child_weight :<br>34.78255126582806; XGB__random_state : 0;<br>XGB__scale_pos_weight : 1.6000016569355706;<br>XGB__subsample : 0.5 | 0.655 | 0.692 |
| XGB | MM | ADASYN | XGB__alpha : 5.0; XGB__colsample_bytree :<br>0.947204554519848; XGB__gamma : 0.1;<br>XGB__max_depth : 2; XGB__min_child_weight :<br>32.51610515339778; XGB__random_state : 0;                                                                         | 0.655 | 0.712 |

|     |    |        |                                                                                                                                                                                                                                      |       |       |
|-----|----|--------|--------------------------------------------------------------------------------------------------------------------------------------------------------------------------------------------------------------------------------------|-------|-------|
|     |    |        | XGB__scale_pos_weight : 1.8711145177438429;<br>XGB__subsample : 0.5202948901555388                                                                                                                                                   |       |       |
| XGB | MM | SMOTE  | XGB__alpha : 5.0; XGB__colsample_bytree : 1.0;<br>XGB__gamma : 0.1; XGB__max_depth : 3;<br>XGB__min_child_weight : 28.108455796840826;<br>XGB__random_state : 0; XGB__scale_pos_weight : 2.0;<br>XGB__subsample : 0.6385273222839287 | 0.654 | 0.738 |
| XGB | SS | SMOTE  | XGB__alpha : 5.0; XGB__colsample_bytree : 1.0;<br>XGB__gamma : 0.1; XGB__max_depth : 2;<br>XGB__min_child_weight : 34.87601703810017;<br>XGB__random_state : 0; XGB__scale_pos_weight : 2.0;<br>XGB__subsample : 0.5                 | 0.654 | 0.708 |
| XGB | SS | ADASYN | XGB__alpha : 5.0; XGB__colsample_bytree : 0.5;<br>XGB__gamma : 0.1; XGB__max_depth : 1;<br>XGB__min_child_weight : 42.07697318443594;<br>XGB__random_state : 0; XGB__scale_pos_weight : 2.0;<br>XGB__subsample : 0.5185451502535441  | 0.654 | 0.690 |
| RF  | MM | SMOTE  | RF__class_weight : None; RF__criterion : log_loss;<br>RF__max_depth : 5; RF__max_features : 1;<br>RF__min_samples_leaf : 20; RF__n_estimators : 709;<br>RF__random_state : 33                                                        | 0.654 | 0.775 |
| XGB | SS | ADASYN | XGB__alpha : 5.0; XGB__colsample_bytree : 0.5;<br>XGB__gamma : 5.0; XGB__max_depth : 3;<br>XGB__min_child_weight : 36.53564295051981;<br>XGB__random_state : 0; XGB__scale_pos_weight : 2.0;<br>XGB__subsample : 0.5                 | 0.653 | 0.697 |
| XGB | MM | SMOTE  | XGB__alpha : 5.0; XGB__colsample_bytree :<br>0.839380365173769; XGB__gamma : 0.1;<br>XGB__max_depth : 3; XGB__min_child_weight :<br>38.58841595099147; XGB__random_state : 0;                                                        | 0.653 | 0.719 |

|     |    |        |                                                                                                                                                                                                                                                  |       |       |
|-----|----|--------|--------------------------------------------------------------------------------------------------------------------------------------------------------------------------------------------------------------------------------------------------|-------|-------|
|     |    |        | XGB__scale_pos_weight : 2.0; XGB__subsample : 0.6460343647575388                                                                                                                                                                                 |       |       |
| XGB | MM | ADASYN | XGB__alpha : 5.0; XGB__colsample_bytree : 0.5;<br>XGB__gamma : 2.270655376949256;<br>XGB__max_depth : 1; XGB__min_child_weight : 32.08731823757594; XGB__random_state : 0;<br>XGB__scale_pos_weight : 1.542050586715464;<br>XGB__subsample : 0.5 | 0.653 | 0.695 |
| XGB | SS | ADASYN | XGB__alpha : 5.0; XGB__colsample_bytree : 0.5;<br>XGB__gamma : 0.1; XGB__max_depth : 2;<br>XGB__min_child_weight : 50.0; XGB__random_state : 0; XGB__scale_pos_weight : 1.674723178234668;<br>XGB__subsample : 0.7                               | 0.652 | 0.691 |
| XGB | MM | SMOTE  | XGB__alpha : 5.0; XGB__colsample_bytree : 0.5;<br>XGB__gamma : 0.1; XGB__max_depth : 3;<br>XGB__min_child_weight : 36.63597927402169;<br>XGB__random_state : 0; XGB__scale_pos_weight : 2.0;<br>XGB__subsample : 0.6353302095361173              | 0.652 | 0.717 |
| XGB | SS | SMOTE  | XGB__alpha : 5.0; XGB__colsample_bytree : 0.5;<br>XGB__gamma : 5.0; XGB__max_depth : 3;<br>XGB__min_child_weight : 33.288951101423834;<br>XGB__random_state : 0; XGB__scale_pos_weight : 2.0;<br>XGB__subsample : 0.5                            | 0.652 | 0.704 |
| XGB | MM | SMOTE  | XGB__alpha : 5.0; XGB__colsample_bytree : 1.0;<br>XGB__gamma : 0.1; XGB__max_depth : 1;<br>XGB__min_child_weight : 36.6278511511537;<br>XGB__random_state : 0; XGB__scale_pos_weight : 2.0;<br>XGB__subsample : 0.6562608319892366               | 0.652 | 0.723 |
| RF  | MM | SMOTE  | RF__class_weight : balanced; RF__criterion : gini;<br>RF__max_depth : 5; RF__max_features : 1;                                                                                                                                                   | 0.652 | 0.773 |

|     |    |        |                                                                                                                                                                                                                                                                    |       |       |
|-----|----|--------|--------------------------------------------------------------------------------------------------------------------------------------------------------------------------------------------------------------------------------------------------------------------|-------|-------|
|     |    |        | RF__min_samples_leaf : 20; RF__n_estimators : 1000;<br>RF__random_state : 0                                                                                                                                                                                        |       |       |
| RF  | SS | ADASYN | RF__class_weight : balanced; RF__criterion : log_loss;<br>RF__max_depth : 5; RF__max_features : 1;<br>RF__min_samples_leaf : 17; RF__n_estimators : 746;<br>RF__random_state : 1                                                                                   | 0.652 | 0.779 |
| XGB | SS | SMOTE  | XGB__alpha : 5.0; XGB__colsample_bytree : 0.5;<br>XGB__gamma : 0.1; XGB__max_depth : 3;<br>XGB__min_child_weight : 36.20978223446801;<br>XGB__random_state : 0; XGB__scale_pos_weight : 2.0;<br>XGB__subsample : 0.5252290291005896                                | 0.652 | 0.707 |
| XGB | MM | ADASYN | XGB__alpha : 5.0; XGB__colsample_bytree : 1.0;<br>XGB__gamma : 0.1; XGB__max_depth : 1;<br>XGB__min_child_weight : 30.723529105039383;<br>XGB__random_state : 0; XGB__scale_pos_weight :<br>1.3588467096218786; XGB__subsample : 0.5                               | 0.652 | 0.702 |
| XGB | MM | SMOTE  | XGB__alpha : 8.535645016770244;<br>XGB__colsample_bytree : 0.564658961611182;<br>XGB__gamma : 0.1; XGB__max_depth : 3;<br>XGB__min_child_weight : 49.27294225655442;<br>XGB__random_state : 0; XGB__scale_pos_weight : 2.0;<br>XGB__subsample : 0.6120357168191886 | 0.651 | 0.686 |
| XGB | MM | SMOTE  | XGB__alpha : 5.0; XGB__colsample_bytree : 0.5;<br>XGB__gamma : 0.1; XGB__max_depth : 3;<br>XGB__min_child_weight : 38.31684706500907;<br>XGB__random_state : 0; XGB__scale_pos_weight : 2.0;<br>XGB__subsample : 0.66195014280539                                  | 0.651 | 0.717 |
| XGB | SS | SMOTE  | XGB__alpha : 5.0; XGB__colsample_bytree : 1.0;<br>XGB__gamma : 0.1; XGB__max_depth : 2;<br>XGB__min_child_weight : 35.66649193306906;                                                                                                                              | 0.651 | 0.714 |

|     |    |        |                                                                                                                                                                                                                                                                      |       |       |
|-----|----|--------|----------------------------------------------------------------------------------------------------------------------------------------------------------------------------------------------------------------------------------------------------------------------|-------|-------|
|     |    |        | XGB__random_state : 0; XGB__scale_pos_weight : 2.0;<br>XGB__subsample : 0.5644738656710776                                                                                                                                                                           |       |       |
| XGB | SS | SMOTE  | XGB__alpha : 5.0; XGB__colsample_bytree :<br>0.92301881636697; XGB__gamma : 0.1;<br>XGB__max_depth : 2; XGB__min_child_weight :<br>31.461190726467965; XGB__random_state : 0;<br>XGB__scale_pos_weight : 1.798097337999943;<br>XGB__subsample : 0.5724442082071851   | 0.651 | 0.718 |
| XGB | SS | SMOTE  | XGB__alpha : 9.947967265873556;<br>XGB__colsample_bytree : 0.5; XGB__gamma : 0.1;<br>XGB__max_depth : 1; XGB__min_child_weight :<br>32.005004962451814; XGB__random_state : 0;<br>XGB__scale_pos_weight : 1.6051579466102508;<br>XGB__subsample : 0.7                | 0.651 | 0.720 |
| XGB | SS | ADASYN | XGB__alpha : 5.0; XGB__colsample_bytree : 0.5;<br>XGB__gamma : 0.1; XGB__max_depth : 1;<br>XGB__min_child_weight : 25.489236973082285;<br>XGB__random_state : 0; XGB__scale_pos_weight :<br>1.1558347277987266; XGB__subsample : 0.5                                 | 0.650 | 0.712 |
| XGB | SS | SMOTE  | XGB__alpha : 5.0; XGB__colsample_bytree : 0.5;<br>XGB__gamma : 0.1; XGB__max_depth : 3;<br>XGB__min_child_weight : 33.955566325242835;<br>XGB__random_state : 0; XGB__scale_pos_weight : 2.0;<br>XGB__subsample : 0.7                                                | 0.650 | 0.730 |
| XGB | MM | ADASYN | XGB__alpha : 5.0; XGB__colsample_bytree :<br>0.8111507512716805; XGB__gamma : 0.1;<br>XGB__max_depth : 1; XGB__min_child_weight :<br>33.55974256592578; XGB__random_state : 0;<br>XGB__scale_pos_weight : 1.4106261852786681;<br>XGB__subsample : 0.6136452727589473 | 0.650 | 0.713 |

|     |    |        |                                                                                                                                                                                                                                                                                      |       |       |
|-----|----|--------|--------------------------------------------------------------------------------------------------------------------------------------------------------------------------------------------------------------------------------------------------------------------------------------|-------|-------|
| XGB | SS | SMOTE  | XGB__alpha : 17.535957647485876;<br>XGB__colsample_bytree : 0.805407502146489;<br>XGB__gamma : 5.0; XGB__max_depth : 1;<br>XGB__min_child_weight : 0.0; XGB__random_state :<br>0; XGB__scale_pos_weight : 2.0; XGB__subsample :<br>0.5303018670951418                                | 0.650 | 0.703 |
| XGB | MM | SMOTE  | XGB__alpha : 8.856391040374422;<br>XGB__colsample_bytree : 0.9483816792602746;<br>XGB__gamma : 0.1; XGB__max_depth : 2;<br>XGB__min_child_weight : 38.47234786836239;<br>XGB__random_state : 0; XGB__scale_pos_weight : 2.0;<br>XGB__subsample : 0.7                                 | 0.650 | 0.715 |
| XGB | MM | SMOTE  | XGB__alpha : 5.0; XGB__colsample_bytree : 0.5;<br>XGB__gamma : 0.1; XGB__max_depth : 3;<br>XGB__min_child_weight : 36.3648510105573;<br>XGB__random_state : 0; XGB__scale_pos_weight : 2.0;<br>XGB__subsample : 0.7                                                                  | 0.650 | 0.723 |
| XGB | MM | ADASYN | XGB__alpha : 5.0; XGB__colsample_bytree :<br>0.5760919210120137; XGB__gamma : 0.1;<br>XGB__max_depth : 3; XGB__min_child_weight :<br>32.41209755099559; XGB__random_state : 0;<br>XGB__scale_pos_weight : 1.4474858421928154;<br>XGB__subsample : 0.5815396095303651                 | 0.650 | 0.712 |
| XGB | MM | SMOTE  | XGB__alpha : 5.0847870719083;<br>XGB__colsample_bytree : 0.8560730276902576;<br>XGB__gamma : 0.1; XGB__max_depth : 2;<br>XGB__min_child_weight : 34.054533340356926;<br>XGB__random_state : 0; XGB__scale_pos_weight :<br>1.9940777058431203; XGB__subsample :<br>0.6894420372017718 | 0.650 | 0.727 |

|     |    |        |                                                                                                                                                                                                                                                                                    |       |       |
|-----|----|--------|------------------------------------------------------------------------------------------------------------------------------------------------------------------------------------------------------------------------------------------------------------------------------------|-------|-------|
| XGB | SS | ADASYN | XGB__alpha : 5.0; XGB__colsample_bytree : 0.5;<br>XGB__gamma : 3.4470211671040367;<br>XGB__max_depth : 1; XGB__min_child_weight :<br>27.79290671493711; XGB__random_state : 0;<br>XGB__scale_pos_weight : 1.6634364151573753;<br>XGB__subsample : 0.5                              | 0.650 | 0.711 |
| XGB | SS | SMOTE  | XGB__alpha : 14.129280314425921;<br>XGB__colsample_bytree : 0.5; XGB__gamma : 0.1;<br>XGB__max_depth : 1; XGB__min_child_weight :<br>11.0257950614135; XGB__random_state : 0;<br>XGB__scale_pos_weight : 2.0; XGB__subsample :<br>0.6962739793443856                               | 0.649 | 0.723 |
| XGB | MM | ADASYN | XGB__alpha : 6.505364620795106;<br>XGB__colsample_bytree : 0.5475735878288952;<br>XGB__gamma : 0.1; XGB__max_depth : 1;<br>XGB__min_child_weight : 30.09956364610306;<br>XGB__random_state : 0; XGB__scale_pos_weight :<br>1.93596789582916; XGB__subsample :<br>0.524927908391981 | 0.649 | 0.714 |
| XGB | SS | ADASYN | XGB__alpha : 11.57333581097403;<br>XGB__colsample_bytree : 0.5; XGB__gamma : 0.1;<br>XGB__max_depth : 1; XGB__min_child_weight :<br>21.601295021607672; XGB__random_state : 0;<br>XGB__scale_pos_weight : 1.8126354812894725;<br>XGB__subsample : 0.5                              | 0.649 | 0.719 |
| XGB | SS | ADASYN | XGB__alpha : 5.0; XGB__colsample_bytree : 0.5;<br>XGB__gamma : 5.0; XGB__max_depth : 1;<br>XGB__min_child_weight : 50.0; XGB__random_state :<br>0; XGB__scale_pos_weight : 1.9238957247966377;<br>XGB__subsample : 0.7                                                             | 0.649 | 0.697 |

|     |    |        |                                                                                                                                                                                                                                                                                                      |       |       |
|-----|----|--------|------------------------------------------------------------------------------------------------------------------------------------------------------------------------------------------------------------------------------------------------------------------------------------------------------|-------|-------|
| XGB | SS | SMOTE  | XGB__alpha : 11.045265475242694;<br>XGB__colsample_bytree : 1.0; XGB__gamma : 0.1;<br>XGB__max_depth : 3; XGB__min_child_weight :<br>27.96743388776755; XGB__random_state : 0;<br>XGB__scale_pos_weight : 2.0; XGB__subsample : 0.5                                                                  | 0.649 | 0.712 |
| XGB | SS | ADASYN | XGB__alpha : 15.223943442166723;<br>XGB__colsample_bytree : 0.5; XGB__gamma :<br>2.924043937926691; XGB__max_depth : 1;<br>XGB__min_child_weight : 50.0; XGB__random_state :<br>0; XGB__scale_pos_weight : 1.8042221840506216;<br>XGB__subsample : 0.7                                               | 0.648 | 0.692 |
| XGB | SS | SMOTE  | XGB__alpha : 5.0; XGB__colsample_bytree :<br>0.6212652676144056; XGB__gamma : 0.1;<br>XGB__max_depth : 1; XGB__min_child_weight : 0.0;<br>XGB__random_state : 0; XGB__scale_pos_weight :<br>0.7295402541781564; XGB__subsample :<br>0.6531270273933774                                               | 0.648 | 0.739 |
| XGB | MM | SMOTE  | XGB__alpha : 5.0; XGB__colsample_bytree :<br>0.8813803688090882; XGB__gamma :<br>3.5611985886706155; XGB__max_depth : 1;<br>XGB__min_child_weight : 23.46878992849821;<br>XGB__random_state : 0; XGB__scale_pos_weight :<br>1.189168496118092; XGB__subsample :<br>0.5685061370387613                | 0.648 | 0.711 |
| XGB | SS | ADASYN | XGB__alpha : 6.389490064848099;<br>XGB__colsample_bytree : 0.802981376600967;<br>XGB__gamma : 0.3766716068908169;<br>XGB__max_depth : 1; XGB__min_child_weight :<br>39.933748974672426; XGB__random_state : 0;<br>XGB__scale_pos_weight : 1.4926037913994126;<br>XGB__subsample : 0.6666624265289163 | 0.648 | 0.705 |



|     |    |        |                                                                                                                                                                                                                                                                      |       |       |
|-----|----|--------|----------------------------------------------------------------------------------------------------------------------------------------------------------------------------------------------------------------------------------------------------------------------|-------|-------|
| XGB | SS | ADASYN | XGB__alpha : 5.0; XGB__colsample_bytree : 0.5;<br>XGB__gamma : 0.1; XGB__max_depth : 2;<br>XGB__min_child_weight : 35.39911968331004;<br>XGB__random_state : 0; XGB__scale_pos_weight :<br>1.4037005558005748; XGB__subsample : 0.7                                  | 0.648 | 0.719 |
| XGB | SS | SMOTE  | XGB__alpha : 8.704207077809748;<br>XGB__colsample_bytree : 0.7818468782095859;<br>XGB__gamma : 0.1; XGB__max_depth : 1;<br>XGB__min_child_weight : 0.0; XGB__random_state :<br>0; XGB__scale_pos_weight : 1.9253213856810714;<br>XGB__subsample : 0.6992016675833875 | 0.647 | 0.735 |
| XGB | MM | ADASYN | XGB__alpha : 5.0; XGB__colsample_bytree :<br>0.9230566291195174; XGB__gamma :<br>2.806356147424415; XGB__max_depth : 2;<br>XGB__min_child_weight : 24.916203072630342;<br>XGB__random_state : 0; XGB__scale_pos_weight : 2.0;<br>XGB__subsample : 0.5                | 0.647 | 0.713 |
| XGB | SS | ADASYN | XGB__alpha : 14.654664456390485;<br>XGB__colsample_bytree : 0.5; XGB__gamma : 0.1;<br>XGB__max_depth : 1; XGB__min_child_weight :<br>29.57314269098548; XGB__random_state : 0;<br>XGB__scale_pos_weight : 2.0; XGB__subsample : 0.5                                  | 0.647 | 0.705 |
| XGB | MM | SMOTE  | XGB__alpha : 5.0; XGB__colsample_bytree :<br>0.8092164695967409; XGB__gamma : 0.1;<br>XGB__max_depth : 3; XGB__min_child_weight :<br>32.587360267774585; XGB__random_state : 0;<br>XGB__scale_pos_weight : 2.0; XGB__subsample :<br>0.6239175328569142               | 0.647 | 0.725 |
| XGB | SS | ADASYN | XGB__alpha : 5.0; XGB__colsample_bytree : 0.5;<br>XGB__gamma : 0.1; XGB__max_depth : 1;<br>XGB__min_child_weight : 34.332309181152986;                                                                                                                               | 0.647 | 0.706 |

|     |    |        |                                                                                                                                                                                                                                                                    |       |       |
|-----|----|--------|--------------------------------------------------------------------------------------------------------------------------------------------------------------------------------------------------------------------------------------------------------------------|-------|-------|
|     |    |        | XGB__random_state : 0; XGB__scale_pos_weight : 2.0;<br>XGB__subsample : 0.5                                                                                                                                                                                        |       |       |
| XGB | MM | SMOTE  | XGB__alpha : 5.0; XGB__colsample_bytree : 0.5;<br>XGB__gamma : 0.1; XGB__max_depth : 3;<br>XGB__min_child_weight : 29.901913023975606;<br>XGB__random_state : 0; XGB__scale_pos_weight : 2.0;<br>XGB__subsample : 0.6378923259219701                               | 0.647 | 0.731 |
| XGB | MM | SMOTE  | XGB__alpha : 5.0; XGB__colsample_bytree :<br>0.9892466705096656; XGB__gamma : 0.1;<br>XGB__max_depth : 2; XGB__min_child_weight : 50.0;<br>XGB__random_state : 0; XGB__scale_pos_weight : 2.0;<br>XGB__subsample : 0.7                                             | 0.647 | 0.701 |
| XGB | SS | ADASYN | XGB__alpha : 5.0; XGB__colsample_bytree :<br>0.654429478054703; XGB__gamma :<br>3.464379574024734; XGB__max_depth : 3;<br>XGB__min_child_weight : 44.97059425227498;<br>XGB__random_state : 0; XGB__scale_pos_weight : 2.0;<br>XGB__subsample : 0.5943308183959563 | 0.647 | 0.693 |
| XGB | SS | SMOTE  | XGB__alpha : 5.0; XGB__colsample_bytree :<br>0.7863163139160485; XGB__gamma : 5.0;<br>XGB__max_depth : 2; XGB__min_child_weight :<br>24.910126845176602; XGB__random_state : 0;<br>XGB__scale_pos_weight : 1.2113785147779215;<br>XGB__subsample : 0.7             | 0.647 | 0.721 |
| XGB | SS | ADASYN | XGB__alpha : 15.868096749009974;<br>XGB__colsample_bytree : 0.5; XGB__gamma : 0.1;<br>XGB__max_depth : 2; XGB__min_child_weight : 50.0;<br>XGB__random_state : 0; XGB__scale_pos_weight : 2.0;<br>XGB__subsample : 0.7                                             | 0.647 | 0.699 |
| RF  | SS | ADASYN | RF__class_weight : balanced_subsample;<br>RF__criterion : log_loss; RF__max_depth : 2;                                                                                                                                                                             | 0.647 | 0.718 |

|     |    |        |                                                                                                                                                                                                                                                                                  |       |       |
|-----|----|--------|----------------------------------------------------------------------------------------------------------------------------------------------------------------------------------------------------------------------------------------------------------------------------------|-------|-------|
|     |    |        | RF__max_features : 8; RF__min_samples_leaf : 6;<br>RF__n_estimators : 614; RF__random_state : 65                                                                                                                                                                                 |       |       |
| NN  | SS | ADASYN | NN__activation : tanh; NN__alpha :<br>0.3184983766348907; NN__hidden_layer_sizes : 35;<br>NN__max_iter : 237; NN__random_state : 0;<br>NN__solver : adam                                                                                                                         | 0.647 | 0.769 |
| XGB | SS | SMOTE  | XGB__alpha : 5.0; XGB__colsample_bytree : 1.0;<br>XGB__gamma : 5.0; XGB__max_depth : 3;<br>XGB__min_child_weight : 37.92246615752253;<br>XGB__random_state : 0; XGB__scale_pos_weight : 2.0;<br>XGB__subsample : 0.5379780671937486                                              | 0.646 | 0.702 |
| XGB | SS | SMOTE  | XGB__alpha : 5.0; XGB__colsample_bytree : 0.5;<br>XGB__gamma : 2.4106379477706272;<br>XGB__max_depth : 1; XGB__min_child_weight :<br>31.647899528708272; XGB__random_state : 0;<br>XGB__scale_pos_weight : 1.990591567894769;<br>XGB__subsample : 0.5                            | 0.646 | 0.706 |
| XGB | SS | ADASYN | XGB__alpha : 5.0; XGB__colsample_bytree : 0.5;<br>XGB__gamma : 2.6242282899365024;<br>XGB__max_depth : 1; XGB__min_child_weight :<br>17.076385017139156; XGB__random_state : 0;<br>XGB__scale_pos_weight : 2.0; XGB__subsample : 0.5                                             | 0.646 | 0.722 |
| XGB | MM | SMOTE  | XGB__alpha : 5.555014824989462;<br>XGB__colsample_bytree : 0.8136608731786787;<br>XGB__gamma : 3.87949850561411; XGB__max_depth :<br>3; XGB__min_child_weight : 46.02881863076087;<br>XGB__random_state : 0; XGB__scale_pos_weight : 2.0;<br>XGB__subsample : 0.6665827585293885 | 0.646 | 0.700 |
| XGB | SS | SMOTE  | XGB__alpha : 16.349830223666636;<br>XGB__colsample_bytree : 1.0; XGB__gamma : 0.1;<br>XGB__max_depth : 1; XGB__min_child_weight : 0.0;                                                                                                                                           | 0.646 | 0.721 |

|     |    |        |                                                                                                                                                                                                                                                                                       |       |       |
|-----|----|--------|---------------------------------------------------------------------------------------------------------------------------------------------------------------------------------------------------------------------------------------------------------------------------------------|-------|-------|
|     |    |        | XGB__random_state : 0; XGB__scale_pos_weight : 2.0;<br>XGB__subsample : 0.7                                                                                                                                                                                                           |       |       |
| XGB | SS | ADASYN | XGB__alpha : 5.0; XGB__colsample_bytree : 1.0;<br>XGB__gamma : 0.1; XGB__max_depth : 1;<br>XGB__min_child_weight : 0.0; XGB__random_state :<br>0; XGB__scale_pos_weight : 0.5; XGB__subsample :<br>0.5                                                                                | 0.646 | 0.733 |
| XGB | SS | SMOTE  | XGB__alpha : 12.94016724446356;<br>XGB__colsample_bytree : 0.7555692587730702;<br>XGB__gamma : 0.1; XGB__max_depth : 1;<br>XGB__min_child_weight : 4.604059493461397;<br>XGB__random_state : 0; XGB__scale_pos_weight :<br>1.2113843128301593; XGB__subsample :<br>0.6817208353559527 | 0.646 | 0.722 |
| XGB | SS | SMOTE  | XGB__alpha : 5.0; XGB__colsample_bytree : 0.5;<br>XGB__gamma : 5.0; XGB__max_depth : 3;<br>XGB__min_child_weight : 33.61525605779739;<br>XGB__random_state : 0; XGB__scale_pos_weight :<br>1.5943270502761795; XGB__subsample : 0.5                                                   | 0.646 | 0.695 |
| XGB | SS | ADASYN | XGB__alpha : 12.690541405047558;<br>XGB__colsample_bytree : 0.5; XGB__gamma : 0.1;<br>XGB__max_depth : 1; XGB__min_child_weight :<br>44.80020323319016; XGB__random_state : 0;<br>XGB__scale_pos_weight : 1.79223470045007;<br>XGB__subsample : 0.7                                   | 0.646 | 0.702 |
| XGB | SS | ADASYN | XGB__alpha : 5.090757681368581;<br>XGB__colsample_bytree : 0.9089150098318758;<br>XGB__gamma : 3.7322854474033345;<br>XGB__max_depth : 2; XGB__min_child_weight :<br>28.933216811419243; XGB__random_state : 0;                                                                       | 0.646 | 0.690 |

|     |    |        |                                                                                                                                                                                                                                                                      |       |       |
|-----|----|--------|----------------------------------------------------------------------------------------------------------------------------------------------------------------------------------------------------------------------------------------------------------------------|-------|-------|
|     |    |        | XGB__scale_pos_weight : 0.9692589593519422;<br>XGB__subsample : 0.5305189173676889                                                                                                                                                                                   |       |       |
| XGB | SS | SMOTE  | XGB__alpha : 5.0; XGB__colsample_bytree : 1.0;<br>XGB__gamma : 0.1; XGB__max_depth : 3;<br>XGB__min_child_weight : 35.76861192557142;<br>XGB__random_state : 0; XGB__scale_pos_weight :<br>1.790707162660277; XGB__subsample : 0.5                                   | 0.646 | 0.699 |
| XGB | MM | ADASYN | XGB__alpha : 6.828335713782861;<br>XGB__colsample_bytree : 0.9589504168060757;<br>XGB__gamma : 0.1; XGB__max_depth : 2;<br>XGB__min_child_weight : 23.574481243074658;<br>XGB__random_state : 0; XGB__scale_pos_weight :<br>0.8636797845630078; XGB__subsample : 0.5 | 0.646 | 0.699 |
| XGB | MM | ADASYN | XGB__alpha : 5.0; XGB__colsample_bytree :<br>0.5500971989007697; XGB__gamma : 0.1;<br>XGB__max_depth : 1; XGB__min_child_weight :<br>15.98180567778082; XGB__random_state : 0;<br>XGB__scale_pos_weight : 0.9838311167256905;<br>XGB__subsample : 0.5                | 0.646 | 0.724 |
| XGB | SS | ADASYN | XGB__alpha : 5.0; XGB__colsample_bytree : 1.0;<br>XGB__gamma : 0.1; XGB__max_depth : 1;<br>XGB__min_child_weight : 35.29496259915357;<br>XGB__random_state : 0; XGB__scale_pos_weight :<br>1.2443730515262763; XGB__subsample :<br>0.6106578643145091                | 0.645 | 0.702 |
| XGB | SS | SMOTE  | XGB__alpha : 5.0; XGB__colsample_bytree : 1.0;<br>XGB__gamma : 0.1; XGB__max_depth : 3;<br>XGB__min_child_weight : 35.371382982503256;<br>XGB__random_state : 0; XGB__scale_pos_weight : 2.0;<br>XGB__subsample : 0.7                                                | 0.645 | 0.728 |

|     |    |        |                                                                                                                                                                                                                                                                                        |       |       |
|-----|----|--------|----------------------------------------------------------------------------------------------------------------------------------------------------------------------------------------------------------------------------------------------------------------------------------------|-------|-------|
| XGB | MM | SMOTE  | XGB__alpha : 5.0; XGB__colsample_bytree : 0.5;<br>XGB__gamma : 0.1; XGB__max_depth : 3;<br>XGB__min_child_weight : 50.0; XGB__random_state :<br>0; XGB__scale_pos_weight : 2.0; XGB__subsample :<br>0.7                                                                                | 0.645 | 0.697 |
| XGB | SS | ADASYN | XGB__alpha : 5.0; XGB__colsample_bytree : 0.5;<br>XGB__gamma : 0.6104411377671863;<br>XGB__max_depth : 1; XGB__min_child_weight :<br>16.777980329250923; XGB__random_state : 0;<br>XGB__scale_pos_weight : 1.5848982688405036;<br>XGB__subsample : 0.5                                 | 0.645 | 0.730 |
| XGB | SS | ADASYN | XGB__alpha : 11.014604677326979;<br>XGB__colsample_bytree : 0.5434445849323879;<br>XGB__gamma : 0.7772434129833954;<br>XGB__max_depth : 1; XGB__min_child_weight :<br>37.85681623386644; XGB__random_state : 0;<br>XGB__scale_pos_weight : 2.0; XGB__subsample :<br>0.6169110159099915 | 0.645 | 0.703 |
| XGB | SS | ADASYN | XGB__alpha : 5.0; XGB__colsample_bytree :<br>0.9312464311386109; XGB__gamma : 0.1;<br>XGB__max_depth : 1; XGB__min_child_weight :<br>29.85742369792121; XGB__random_state : 0;<br>XGB__scale_pos_weight : 1.6008295671355113;<br>XGB__subsample : 0.7                                  | 0.645 | 0.731 |
| XGB | SS | SMOTE  | XGB__alpha : 13.106405421775447;<br>XGB__colsample_bytree : 0.5; XGB__gamma : 0.1;<br>XGB__max_depth : 1; XGB__min_child_weight : 0.0;<br>XGB__random_state : 0; XGB__scale_pos_weight :<br>1.2741479514907657; XGB__subsample : 0.7                                                   | 0.645 | 0.721 |
| XGB | MM | ADASYN | XGB__alpha : 5.0; XGB__colsample_bytree :<br>0.9458187950051224; XGB__gamma :                                                                                                                                                                                                          | 0.645 | 0.703 |

|     |    |        |                                                                                                                                                                                                                                                                                        |       |       |
|-----|----|--------|----------------------------------------------------------------------------------------------------------------------------------------------------------------------------------------------------------------------------------------------------------------------------------------|-------|-------|
|     |    |        | 4.544020954420247; XGB__max_depth : 1;<br>XGB__min_child_weight : 31.47265565229504;<br>XGB__random_state : 0; XGB__scale_pos_weight :<br>1.7112467395285698; XGB__subsample :<br>0.5674608928385733                                                                                   |       |       |
| XGB | SS | ADASYN | XGB__alpha : 5.0; XGB__colsample_bytree : 0.5;<br>XGB__gamma : 0.5210830103832461;<br>XGB__max_depth : 3; XGB__min_child_weight :<br>38.1278119678781; XGB__random_state : 0;<br>XGB__scale_pos_weight : 1.5698201304799229;<br>XGB__subsample : 0.620291502842846                     | 0.645 | 0.705 |
| XGB | MM | SMOTE  | XGB__alpha : 5.0; XGB__colsample_bytree :<br>0.8186004870289096; XGB__gamma :<br>3.9478774665581104; XGB__max_depth : 1;<br>XGB__min_child_weight : 29.263828204867657;<br>XGB__random_state : 0; XGB__scale_pos_weight :<br>1.290975669685075; XGB__subsample :<br>0.5783144139861306 | 0.645 | 0.705 |
| XGB | SS | ADASYN | XGB__alpha : 5.0; XGB__colsample_bytree : 1.0;<br>XGB__gamma : 3.3038875903320295;<br>XGB__max_depth : 1; XGB__min_child_weight :<br>23.93592616950563; XGB__random_state : 0;<br>XGB__scale_pos_weight : 2.0; XGB__subsample : 0.5                                                    | 0.645 | 0.722 |
| XGB | MM | ADASYN | XGB__alpha : 5.0; XGB__colsample_bytree : 1.0;<br>XGB__gamma : 0.1; XGB__max_depth : 2;<br>XGB__min_child_weight : 26.174477010078856;<br>XGB__random_state : 0; XGB__scale_pos_weight :<br>0.8473506930391306; XGB__subsample : 0.5                                                   | 0.644 | 0.692 |
| RF  | SS | ADASYN | RF__class_weight : None; RF__criterion : log_loss;<br>RF__max_depth : 3; RF__max_features : 5;                                                                                                                                                                                         | 0.644 | 0.753 |

|     |    |        |                                                                                                                                                                                                                                                        |       |       |
|-----|----|--------|--------------------------------------------------------------------------------------------------------------------------------------------------------------------------------------------------------------------------------------------------------|-------|-------|
|     |    |        | RF__min_samples_leaf : 1; RF__n_estimators : 445;<br>RF__random_state : 100                                                                                                                                                                            |       |       |
| RF  | MM | SMOTE  | RF__class_weight : balanced_subsample;<br>RF__criterion : log_loss; RF__max_depth : 2;<br>RF__max_features : 3; RF__min_samples_leaf : 11;<br>RF__n_estimators : 470; RF__random_state : 46                                                            | 0.644 | 0.737 |
| XGB | SS | SMOTE  | XGB__alpha : 5.0; XGB__colsample_bytree : 1.0;<br>XGB__gamma : 0.1; XGB__max_depth : 1;<br>XGB__min_child_weight : 34.91505732296905;<br>XGB__random_state : 0; XGB__scale_pos_weight : 2.0;<br>XGB__subsample : 0.7                                   | 0.644 | 0.728 |
| XGB | MM | SMOTE  | XGB__alpha : 5.0; XGB__colsample_bytree : 0.5;<br>XGB__gamma : 0.1; XGB__max_depth : 3;<br>XGB__min_child_weight : 49.32918662998627;<br>XGB__random_state : 0; XGB__scale_pos_weight :<br>1.9199855167561757; XGB__subsample :<br>0.6808018192896189  | 0.644 | 0.696 |
| XGB | MM | SMOTE  | XGB__alpha : 5.0; XGB__colsample_bytree : 0.5;<br>XGB__gamma : 2.4789201044073765;<br>XGB__max_depth : 2; XGB__min_child_weight :<br>21.317318502348016; XGB__random_state : 0;<br>XGB__scale_pos_weight : 1.6932796247991477;<br>XGB__subsample : 0.5 | 0.644 | 0.722 |
| XGB | SS | SMOTE  | XGB__alpha : 5.0; XGB__colsample_bytree : 0.5;<br>XGB__gamma : 0.1; XGB__max_depth : 1;<br>XGB__min_child_weight : 6.069270285354885;<br>XGB__random_state : 0; XGB__scale_pos_weight :<br>0.9142335532025312; XGB__subsample : 0.7                    | 0.644 | 0.739 |
| XGB | SS | ADASYN | XGB__alpha : 5.0; XGB__colsample_bytree : 1.0;<br>XGB__gamma : 0.1; XGB__max_depth : 1;<br>XGB__min_child_weight : 35.92902767599311;                                                                                                                  | 0.643 | 0.686 |



|     |    |        |                                                                                                                                                                                                                                                     |       |       |
|-----|----|--------|-----------------------------------------------------------------------------------------------------------------------------------------------------------------------------------------------------------------------------------------------------|-------|-------|
|     |    |        | XGB__random_state : 0; XGB__scale_pos_weight : 1.4560979758247516; XGB__subsample : 0.5                                                                                                                                                             |       |       |
| XGB | SS | ADASYN | XGB__alpha : 5.0; XGB__colsample_bytree : 1.0; XGB__gamma : 5.0; XGB__max_depth : 1; XGB__min_child_weight : 50.0; XGB__random_state : 0; XGB__scale_pos_weight : 2.0; XGB__subsample : 0.7                                                         | 0.643 | 0.699 |
| XGB | SS | ADASYN | XGB__alpha : 5.0; XGB__colsample_bytree : 0.5; XGB__gamma : 1.593725263078724; XGB__max_depth : 3; XGB__min_child_weight : 22.96770129500678; XGB__random_state : 0; XGB__scale_pos_weight : 1.3234221598079956; XGB__subsample : 0.5               | 0.643 | 0.718 |
| XGB | MM | SMOTE  | XGB__alpha : 5.0; XGB__colsample_bytree : 0.5793871354638163; XGB__gamma : 2.135175777238684; XGB__max_depth : 3; XGB__min_child_weight : 24.97523848885872; XGB__random_state : 0; XGB__scale_pos_weight : 2.0; XGB__subsample : 0.532107668200475 | 0.643 | 0.721 |
| XGB | MM | ADASYN | XGB__alpha : 5.0; XGB__colsample_bytree : 1.0; XGB__gamma : 0.1; XGB__max_depth : 1; XGB__min_child_weight : 24.822233736774376; XGB__random_state : 0; XGB__scale_pos_weight : 1.0560941798795729; XGB__subsample : 0.5601657872007464             | 0.643 | 0.716 |
| XGB | MM | ADASYN | XGB__alpha : 6.682648842233059; XGB__colsample_bytree : 0.7959821257042177; XGB__gamma : 0.1; XGB__max_depth : 1; XGB__min_child_weight : 38.26825930773817; XGB__random_state : 0; XGB__scale_pos_weight : 1.31135133887779; XGB__subsample : 0.7  | 0.643 | 0.708 |

|     |    |        |                                                                                                                                                                                                                                                                                     |       |       |
|-----|----|--------|-------------------------------------------------------------------------------------------------------------------------------------------------------------------------------------------------------------------------------------------------------------------------------------|-------|-------|
| XGB | MM | ADASYN | XGB__alpha : 5.0; XGB__colsample_bytree : 0.5077765683712948; XGB__gamma : 3.4982070396120037; XGB__max_depth : 2; XGB__min_child_weight : 24.48101772134476; XGB__random_state : 0; XGB__scale_pos_weight : 2.0; XGB__subsample : 0.5                                              | 0.642 | 0.714 |
| XGB | MM | SMOTE  | XGB__alpha : 5.090757681368581; XGB__colsample_bytree : 0.9089150098318758; XGB__gamma : 3.7322854474033345; XGB__max_depth : 2; XGB__min_child_weight : 28.933216811419243; XGB__random_state : 0; XGB__scale_pos_weight : 0.9692589593519422; XGB__subsample : 0.5305189173676889 | 0.642 | 0.686 |
| XGB | MM | ADASYN | XGB__alpha : 5.0; XGB__colsample_bytree : 0.7632963420740408; XGB__gamma : 2.4487777466835854; XGB__max_depth : 2; XGB__min_child_weight : 25.664108006195203; XGB__random_state : 0; XGB__scale_pos_weight : 1.2170515560952246; XGB__subsample : 0.5                              | 0.642 | 0.703 |
| XGB | MM | ADASYN | XGB__alpha : 5.0; XGB__colsample_bytree : 0.9557350378947429; XGB__gamma : 1.8809283149686082; XGB__max_depth : 2; XGB__min_child_weight : 25.769073125312154; XGB__random_state : 0; XGB__scale_pos_weight : 2.0; XGB__subsample : 0.5                                             | 0.642 | 0.716 |
| XGB | MM | SMOTE  | XGB__alpha : 9.610813214696833; XGB__colsample_bytree : 0.5; XGB__gamma : 2.496083933674486; XGB__max_depth : 1; XGB__min_child_weight : 34.030263952063486; XGB__random_state : 0; XGB__scale_pos_weight :                                                                         | 0.642 | 0.710 |

|     |    |        |                                                                                                                                                                                                                                                                      |       |       |
|-----|----|--------|----------------------------------------------------------------------------------------------------------------------------------------------------------------------------------------------------------------------------------------------------------------------|-------|-------|
|     |    |        | 1.899584803291475; XGB__subsample :<br>0.6796461564528673                                                                                                                                                                                                            |       |       |
| XGB | MM | ADASYN | XGB__alpha : 5.0; XGB__colsample_bytree :<br>0.9118031856681843; XGB__gamma :<br>3.283060487896752; XGB__max_depth : 3;<br>XGB__min_child_weight : 24.968263168116444;<br>XGB__random_state : 0; XGB__scale_pos_weight :<br>1.9067286778397454; XGB__subsample : 0.5 | 0.642 | 0.713 |
| RF  | SS | ADASYN | RF__class_weight : balanced_subsample;<br>RF__criterion : log_loss; RF__max_depth : 1;<br>RF__max_features : 3; RF__min_samples_leaf : 15;<br>RF__n_estimators : 897; RF__random_state : 90                                                                          | 0.642 | 0.713 |
| RF  | SS | ADASYN | RF__class_weight : None; RF__criterion : log_loss;<br>RF__max_depth : 2; RF__max_features : 9;<br>RF__min_samples_leaf : 13; RF__n_estimators : 323;<br>RF__random_state : 14                                                                                        | 0.641 | 0.716 |
| RF  | SS | ADASYN | RF__class_weight : None; RF__criterion : log_loss;<br>RF__max_depth : 1; RF__max_features : 3;<br>RF__min_samples_leaf : 7; RF__n_estimators : 487;<br>RF__random_state : 51                                                                                         | 0.641 | 0.713 |
| RF  | MM | SMOTE  | RF__class_weight : balanced; RF__criterion : gini;<br>RF__max_depth : 1; RF__max_features : 2;<br>RF__min_samples_leaf : 20; RF__n_estimators : 300;<br>RF__random_state : 0                                                                                         | 0.641 | 0.721 |
| RF  | SS | ADASYN | RF__class_weight : balanced; RF__criterion : log_loss;<br>RF__max_depth : 4; RF__max_features : 3;<br>RF__min_samples_leaf : 6; RF__n_estimators : 418;<br>RF__random_state : 31                                                                                     | 0.641 | 0.779 |
| XGB | MM | ADASYN | XGB__alpha : 10.331149362834475;<br>XGB__colsample_bytree : 0.757383253596286;<br>XGB__gamma : 0.1; XGB__max_depth : 1;                                                                                                                                              | 0.641 | 0.712 |

|     |    |        |                                                                                                                                                                                                                                                                                                      |       |       |
|-----|----|--------|------------------------------------------------------------------------------------------------------------------------------------------------------------------------------------------------------------------------------------------------------------------------------------------------------|-------|-------|
|     |    |        | XGB__min_child_weight : 28.244738519918737;<br>XGB__random_state : 0; XGB__scale_pos_weight :<br>1.6352415369130944; XGB__subsample :<br>0.6003339919157272                                                                                                                                          |       |       |
| XGB | MM | ADASYN | XGB__alpha : 9.138688430626786;<br>XGB__colsample_bytree : 0.9816150455877549;<br>XGB__gamma : 2.3410678419602227;<br>XGB__max_depth : 1; XGB__min_child_weight :<br>25.424861302988226; XGB__random_state : 0;<br>XGB__scale_pos_weight : 2.0; XGB__subsample : 0.5                                 | 0.640 | 0.705 |
| RF  | SS | ADASYN | RF__class_weight : balanced_subsample;<br>RF__criterion : log_loss; RF__max_depth : 3;<br>RF__max_features : 8; RF__min_samples_leaf : 3;<br>RF__n_estimators : 319; RF__random_state : 57                                                                                                           | 0.640 | 0.747 |
| XGB | MM | ADASYN | XGB__alpha : 6.53173065258426;<br>XGB__colsample_bytree : 1.0; XGB__gamma : 0.1;<br>XGB__max_depth : 3; XGB__min_child_weight :<br>23.58071968410965; XGB__random_state : 0;<br>XGB__scale_pos_weight : 1.2485626334583546;<br>XGB__subsample : 0.5076127783456571                                   | 0.640 | 0.713 |
| XGB | MM | ADASYN | XGB__alpha : 5.024826632028878;<br>XGB__colsample_bytree : 0.607507595086666;<br>XGB__gamma : 2.5114251347540666;<br>XGB__max_depth : 2; XGB__min_child_weight :<br>21.975148208105896; XGB__random_state : 0;<br>XGB__scale_pos_weight : 0.8004227893896005;<br>XGB__subsample : 0.5374979839310523 | 0.640 | 0.700 |
| XGB | MM | SMOTE  | XGB__alpha : 5.0; XGB__colsample_bytree : 0.5;<br>XGB__gamma : 1.5303206552835271;<br>XGB__max_depth : 2; XGB__min_child_weight :<br>28.29673162640361; XGB__random_state : 0;                                                                                                                       | 0.640 | 0.709 |

|     |    |        |                                                                                                                                                                                                                                                                       |       |       |
|-----|----|--------|-----------------------------------------------------------------------------------------------------------------------------------------------------------------------------------------------------------------------------------------------------------------------|-------|-------|
|     |    |        | XGB__scale_pos_weight : 1.6048062657022475;<br>XGB__subsample : 0.5                                                                                                                                                                                                   |       |       |
| RF  | SS | ADASYN | RF__class_weight : balanced_subsample;<br>RF__criterion : gini; RF__max_depth : 2;<br>RF__max_features : 3; RF__min_samples_leaf : 20;<br>RF__n_estimators : 895; RF__random_state : 73                                                                               | 0.640 | 0.726 |
| XGB | MM | ADASYN | XGB__alpha : 5.0; XGB__colsample_bytree :<br>0.7830652058141597; XGB__gamma : 0.1;<br>XGB__max_depth : 2; XGB__min_child_weight :<br>20.902230624047338; XGB__random_state : 0;<br>XGB__scale_pos_weight : 0.9487905507204323;<br>XGB__subsample : 0.5251617649513477 | 0.640 | 0.718 |
| XGB | MM | ADASYN | XGB__alpha : 5.0; XGB__colsample_bytree :<br>0.904476155681954; XGB__gamma :<br>2.6525593861219265; XGB__max_depth : 2;<br>XGB__min_child_weight : 22.86105851841431;<br>XGB__random_state : 0; XGB__scale_pos_weight :<br>1.0055481801673023; XGB__subsample : 0.5   | 0.639 | 0.703 |
| XGB | MM | SMOTE  | XGB__alpha : 30.0; XGB__colsample_bytree : 0.5;<br>XGB__gamma : 0.1; XGB__max_depth : 1;<br>XGB__min_child_weight : 0.0; XGB__random_state :<br>0; XGB__scale_pos_weight : 1.5194070724266835;<br>XGB__subsample : 0.5                                                | 0.639 | 0.688 |
| XGB | MM | SMOTE  | XGB__alpha : 5.0; XGB__colsample_bytree : 0.5;<br>XGB__gamma : 0.5560886450468363;<br>XGB__max_depth : 3; XGB__min_child_weight :<br>22.06792380347624; XGB__random_state : 0;<br>XGB__scale_pos_weight : 1.9836774131711135;<br>XGB__subsample : 0.513029158504781   | 0.639 | 0.731 |
| XGB | MM | SMOTE  | XGB__alpha : 5.0; XGB__colsample_bytree : 1.0;<br>XGB__gamma : 3.3428174387647167;                                                                                                                                                                                    | 0.638 | 0.719 |

|     |    |        |                                                                                                                                                                                                                                                        |       |       |
|-----|----|--------|--------------------------------------------------------------------------------------------------------------------------------------------------------------------------------------------------------------------------------------------------------|-------|-------|
|     |    |        | XGB__max_depth : 1; XGB__min_child_weight :<br>29.0094485985584; XGB__random_state : 0;<br>XGB__scale_pos_weight : 1.6433391737264327;<br>XGB__subsample : 0.7                                                                                         |       |       |
| XGB | MM | ADASYN | XGB__alpha : 5.0; XGB__colsample_bytree :<br>0.8464017889354936; XGB__gamma :<br>2.789425688176876; XGB__max_depth : 3;<br>XGB__min_child_weight : 24.05925237186569;<br>XGB__random_state : 0; XGB__scale_pos_weight : 2.0;<br>XGB__subsample : 0.5   | 0.638 | 0.714 |
| XGB | MM | SMOTE  | XGB__alpha : 5.0; XGB__colsample_bytree : 1.0;<br>XGB__gamma : 4.0241424936389345;<br>XGB__max_depth : 1; XGB__min_child_weight :<br>31.949573776380756; XGB__random_state : 0;<br>XGB__scale_pos_weight : 2.0; XGB__subsample : 0.7                   | 0.638 | 0.716 |
| XGB | MM | SMOTE  | XGB__alpha : 5.0; XGB__colsample_bytree :<br>0.5466719428805302; XGB__gamma : 0.1;<br>XGB__max_depth : 1; XGB__min_child_weight : 0.0;<br>XGB__random_state : 0; XGB__scale_pos_weight :<br>1.1419602419721246; XGB__subsample :<br>0.6005673810243899 | 0.637 | 0.739 |
| XGB | MM | SMOTE  | XGB__alpha : 12.899472874131337;<br>XGB__colsample_bytree : 1.0; XGB__gamma : 0.1;<br>XGB__max_depth : 3; XGB__min_child_weight :<br>28.592127912125463; XGB__random_state : 0;<br>XGB__scale_pos_weight : 1.7869053519864724;<br>XGB__subsample : 0.5 | 0.637 | 0.704 |
| XGB | MM | ADASYN | XGB__alpha : 5.0; XGB__colsample_bytree :<br>0.9716377416872342; XGB__gamma :<br>3.1389689669089993; XGB__max_depth : 2;<br>XGB__min_child_weight : 22.454326191301643;                                                                                | 0.637 | 0.690 |

|     |    |        |                                                                                                                                                                                                                                                                                                   |       |       |
|-----|----|--------|---------------------------------------------------------------------------------------------------------------------------------------------------------------------------------------------------------------------------------------------------------------------------------------------------|-------|-------|
|     |    |        | XGB__random_state : 0; XGB__scale_pos_weight : 0.7976241387808932; XGB__subsample : 0.5                                                                                                                                                                                                           |       |       |
| XGB | MM | ADASYN | XGB__alpha : 8.495652245314343;<br>XGB__colsample_bytree : 0.6641387807088202;<br>XGB__gamma : 0.8831447638334863;<br>XGB__max_depth : 1; XGB__min_child_weight : 26.513980700965362; XGB__random_state : 0;<br>XGB__scale_pos_weight : 1.361350461624014;<br>XGB__subsample : 0.5013293298143793 | 0.637 | 0.702 |
| XGB | MM | ADASYN | XGB__alpha : 14.516125569122034;<br>XGB__colsample_bytree : 0.7160312574064115;<br>XGB__gamma : 0.1; XGB__max_depth : 1;<br>XGB__min_child_weight : 31.958393761023522;<br>XGB__random_state : 0; XGB__scale_pos_weight : 2.0;<br>XGB__subsample : 0.5                                            | 0.636 | 0.694 |
| RF  | SS | ADASYN | RF__class_weight : balanced_subsample;<br>RF__criterion : gini; RF__max_depth : 4;<br>RF__max_features : 1; RF__min_samples_leaf : 1;<br>RF__n_estimators : 518; RF__random_state : 1                                                                                                             | 0.636 | 0.803 |
| RF  | SS | ADASYN | RF__class_weight : balanced_subsample;<br>RF__criterion : log_loss; RF__max_depth : 1;<br>RF__max_features : 4; RF__min_samples_leaf : 2;<br>RF__n_estimators : 518; RF__random_state : 16                                                                                                        | 0.631 | 0.706 |
| RF  | SS | ADASYN | RF__class_weight : balanced_subsample;<br>RF__criterion : gini; RF__max_depth : 3;<br>RF__max_features : 9; RF__min_samples_leaf : 1;<br>RF__n_estimators : 841; RF__random_state : 1                                                                                                             | 0.631 | 0.764 |
| NN  | SS | ADASYN | NN__activation : tanh; NN__alpha : 0.0001;<br>NN__hidden_layer_sizes : 3; NN__max_iter : 500;<br>NN__random_state : 0; NN__solver : lbfgs                                                                                                                                                         | 0.624 | 0.764 |

|    |    |        |                                                                                                                                                             |       |       |
|----|----|--------|-------------------------------------------------------------------------------------------------------------------------------------------------------------|-------|-------|
| NN | SS | ADASYN | NN__activation : relu; NN__alpha :<br>0.0007233655252968397; NN__hidden_layer_sizes : 22;<br>NN__max_iter : 411; NN__random_state : 0;<br>NN__solver : adam | 0.593 | 0.810 |
| NN | SS | ADASYN | NN__activation : logistic; NN__alpha : 0.0001;<br>NN__hidden_layer_sizes : 50; NN__max_iter : 50;<br>NN__random_state : 0; NN__solver : lbfgs               | 0.569 | 0.834 |
| NN | SS | ADASYN | NN__activation : relu; NN__alpha :<br>0.7530466730222446; NN__hidden_layer_sizes : 9;<br>NN__max_iter : 443; NN__random_state : 0;<br>NN__solver : lbfgs    | 0.548 | 0.855 |
| NN | SS | ADASYN | NN__activation : relu; NN__alpha :<br>0.01549337141764052; NN__hidden_layer_sizes : 20;<br>NN__max_iter : 372; NN__random_state : 0;<br>NN__solver : lbfgs  | 0.522 | 0.963 |



ii. 1-year VT recurrence

| Model | Preprocessing | Oversampling | Parameters                                                                                                                                                                              | Mean AUC<br>(test) | Mean AUC<br>(train) |
|-------|---------------|--------------|-----------------------------------------------------------------------------------------------------------------------------------------------------------------------------------------|--------------------|---------------------|
| RF    | SS            | SMOTE        | RF__class_weight : balanced_subsample;<br>RF__criterion : gini; RF__max_depth : 2;<br>RF__max_features : 7; RF__min_samples_leaf : 2;<br>RF__n_estimators : 320; RF__random_state : 100 | 0.713114           | 0.751557            |
| RF    | MM            | SMOTE        | RF__class_weight : balanced_subsample;<br>RF__criterion : gini; RF__max_depth : 2;<br>RF__max_features : 9; RF__min_samples_leaf : 1;<br>RF__n_estimators : 1000; RF__random_state : 0  | 0.712971           | 0.751631            |
| RF    | SS            | SMOTE        | RF__class_weight : balanced; RF__criterion : gini;<br>RF__max_depth : 2; RF__max_features : 6;<br>RF__min_samples_leaf : 1; RF__n_estimators : 300;<br>RF__random_state : 100           | 0.712873           | 0.752107            |
| RF    | SS            | SMOTE        | RF__class_weight : balanced; RF__criterion : gini;<br>RF__max_depth : 2; RF__max_features : 6;<br>RF__min_samples_leaf : 2; RF__n_estimators : 322;<br>RF__random_state : 100           | 0.712873           | 0.751591            |
| RF    | SS            | SMOTE        | RF__class_weight : balanced_subsample;<br>RF__criterion : gini; RF__max_depth : 2;<br>RF__max_features : 6; RF__min_samples_leaf : 1;<br>RF__n_estimators : 300; RF__random_state : 100 | 0.712683           | 0.751863            |
| RF    | Not used      | Not used     | RF__class_weight : None; RF__criterion : gini;<br>RF__max_depth : 3; RF__max_features : 1;<br>RF__min_samples_leaf : 2; RF__n_estimators : 1000;<br>RF__random_state : 58               | 0.712572           | 0.802466            |
| RF    | MM            | SMOTE        | RF__class_weight : balanced_subsample;<br>RF__criterion : gini; RF__max_depth : 2;                                                                                                      | 0.711336           | 0.751717            |

|     |          |          |                                                                                                                                                                                                                                 |          |          |
|-----|----------|----------|---------------------------------------------------------------------------------------------------------------------------------------------------------------------------------------------------------------------------------|----------|----------|
|     |          |          | RF__max_features : 9; RF__min_samples_leaf : 1;<br>RF__n_estimators : 765; RF__random_state : 0                                                                                                                                 |          |          |
| RF  | MM       | SMOTE    | RF__class_weight : balanced_subsample;<br>RF__criterion : gini; RF__max_depth : 2;<br>RF__max_features : 7; RF__min_samples_leaf : 1;<br>RF__n_estimators : 602; RF__random_state : 100                                         | 0.711164 | 0.749136 |
| XGB | Not used | Not used | XGB__colsample_bytree : 1.0; XGB__gamma :<br>9.791519809878324; XGB__max_depth : 3;<br>XGB__min_child_weight : 0.0; XGB__random_state :<br>0; XGB__scale_pos_weight : 3.135366643716628;<br>XGB__subsample : 0.8976962358465848 | 0.711151 | 0.810438 |
| RF  | SS       | SMOTE    | RF__class_weight : None; RF__criterion : gini;<br>RF__max_depth : 2; RF__max_features : 6;<br>RF__min_samples_leaf : 1; RF__n_estimators : 446;<br>RF__random_state : 100                                                       | 0.711082 | 0.752145 |
| RF  | SS       | SMOTE    | RF__class_weight : balanced_subsample;<br>RF__criterion : log_loss; RF__max_depth : 2;<br>RF__max_features : 6; RF__min_samples_leaf : 2;<br>RF__n_estimators : 435; RF__random_state : 100                                     | 0.711037 | 0.747612 |
| RF  | MM       | SMOTE    | RF__class_weight : None; RF__criterion : gini;<br>RF__max_depth : 2; RF__max_features : 7;<br>RF__min_samples_leaf : 1; RF__n_estimators : 1000;<br>RF__random_state : 0                                                        | 0.710973 | 0.751843 |
| RF  | MM       | SMOTE    | RF__class_weight : balanced; RF__criterion : gini;<br>RF__max_depth : 2; RF__max_features : 5;<br>RF__min_samples_leaf : 1; RF__n_estimators : 924;<br>RF__random_state : 100                                                   | 0.710785 | 0.750287 |
| RF  | MM       | SMOTE    | RF__class_weight : None; RF__criterion : gini;<br>RF__max_depth : 2; RF__max_features : 7;<br>RF__min_samples_leaf : 1; RF__n_estimators : 1000;<br>RF__random_state : 100                                                      | 0.71075  | 0.750887 |

|    |          |          |                                                                                                                                                                                        |          |          |
|----|----------|----------|----------------------------------------------------------------------------------------------------------------------------------------------------------------------------------------|----------|----------|
| RF | MM       | SMOTE    | RF__class_weight : balanced; RF__criterion : gini;<br>RF__max_depth : 2; RF__max_features : 9;<br>RF__min_samples_leaf : 1; RF__n_estimators : 360;<br>RF__random_state : 9            | 0.710472 | 0.752736 |
| RF | SS       | SMOTE    | RF__class_weight : balanced_subsample;<br>RF__criterion : gini; RF__max_depth : 2;<br>RF__max_features : 7; RF__min_samples_leaf : 2;<br>RF__n_estimators : 720; RF__random_state : 87 | 0.710248 | 0.753066 |
| RF | Not used | Not used | RF__class_weight : None; RF__criterion : gini;<br>RF__max_depth : 3; RF__max_features : 1;<br>RF__min_samples_leaf : 2; RF__n_estimators : 1000;<br>RF__random_state : 100             | 0.709988 | 0.801734 |
| RF | Not used | Not used | RF__class_weight : None; RF__criterion : gini;<br>RF__max_depth : 3; RF__max_features : 1;<br>RF__min_samples_leaf : 2; RF__n_estimators : 1000;<br>RF__random_state : 67              | 0.709783 | 0.802199 |
| NN | SS       | SMOTE    | NN__activation : logistic; NN__alpha :<br>0.00019205456188436704; NN__hidden_layer_sizes :<br>50; NN__max_iter : 50; NN__random_state : 0;<br>NN__solver : adam                        | 0.709466 | 0.701448 |
| RF | MM       | SMOTE    | RF__class_weight : balanced; RF__criterion : gini;<br>RF__max_depth : 2; RF__max_features : 5;<br>RF__min_samples_leaf : 1; RF__n_estimators : 327;<br>RF__random_state : 99           | 0.709324 | 0.750896 |
| RF | MM       | ADASYN   | RF__class_weight : balanced; RF__criterion : gini;<br>RF__max_depth : 3; RF__max_features : 6;<br>RF__min_samples_leaf : 2; RF__n_estimators : 955;<br>RF__random_state : 30           | 0.709171 | 0.785111 |
| NN | SS       | SMOTE    | NN__activation : logistic; NN__alpha :<br>0.04830937680960537; NN__hidden_layer_sizes : 50;                                                                                            | 0.709053 | 0.701448 |

|    |          |          |                                                                                                                                                                              |          |          |
|----|----------|----------|------------------------------------------------------------------------------------------------------------------------------------------------------------------------------|----------|----------|
|    |          |          | NN__max_iter : 50; NN__random_state : 0;<br>NN__solver : adam                                                                                                                |          |          |
| NN | SS       | ROS      | NN__activation : logistic; NN__alpha : 0.0001;<br>NN__hidden_layer_sizes : 50; NN__max_iter : 50;<br>NN__random_state : 0; NN__solver : adam                                 | 0.709035 | 0.700632 |
| RF | Not used | Not used | RF__class_weight : None; RF__criterion : gini;<br>RF__max_depth : 3; RF__max_features : 1;<br>RF__min_samples_leaf : 3; RF__n_estimators : 1000;<br>RF__random_state : 100   | 0.708817 | 0.799239 |
| RF | Not used | Not used | RF__class_weight : None; RF__criterion : log_loss;<br>RF__max_depth : 2; RF__max_features : 1;<br>RF__min_samples_leaf : 1; RF__n_estimators : 401;<br>RF__random_state : 58 | 0.708755 | 0.775912 |
| RF | Not used | Not used | RF__class_weight : None; RF__criterion : gini;<br>RF__max_depth : 3; RF__max_features : 1;<br>RF__min_samples_leaf : 3; RF__n_estimators : 1000;<br>RF__random_state : 67    | 0.70856  | 0.799681 |
| RF | Not used | Not used | RF__class_weight : None; RF__criterion : log_loss;<br>RF__max_depth : 3; RF__max_features : 1;<br>RF__min_samples_leaf : 1; RF__n_estimators : 414;<br>RF__random_state : 45 | 0.708492 | 0.805885 |
| RF | Not used | Not used | RF__class_weight : None; RF__criterion : gini;<br>RF__max_depth : 3; RF__max_features : 1;<br>RF__min_samples_leaf : 2; RF__n_estimators : 1000;<br>RF__random_state : 24    | 0.708438 | 0.802004 |
| RF | MM       | SMOTE    | RF__class_weight : None; RF__criterion : gini;<br>RF__max_depth : 2; RF__max_features : 5;<br>RF__min_samples_leaf : 1; RF__n_estimators : 395;<br>RF__random_state : 95     | 0.708374 | 0.751916 |
| RF | MM       | SMOTE    | RF__class_weight : None; RF__criterion : gini;<br>RF__max_depth : 2; RF__max_features : 5;                                                                                   | 0.70834  | 0.74744  |

|     |          |          |                                                                                                                                                                                                                                 |          |          |
|-----|----------|----------|---------------------------------------------------------------------------------------------------------------------------------------------------------------------------------------------------------------------------------|----------|----------|
|     |          |          | RF__min_samples_leaf : 3; RF__n_estimators : 529;<br>RF__random_state : 100                                                                                                                                                     |          |          |
| RF  | Not used | Not used | RF__class_weight : None; RF__criterion : gini;<br>RF__max_depth : 3; RF__max_features : 1;<br>RF__min_samples_leaf : 2; RF__n_estimators : 300;<br>RF__random_state : 53                                                        | 0.708302 | 0.801074 |
| RF  | MM       | SMOTE    | RF__class_weight : None; RF__criterion : gini;<br>RF__max_depth : 2; RF__max_features : 6;<br>RF__min_samples_leaf : 1; RF__n_estimators : 377;<br>RF__random_state : 6                                                         | 0.708289 | 0.752328 |
| NN  | SS       | ROS      | NN__activation : logistic; NN__alpha : 0.0001;<br>NN__hidden_layer_sizes : 50; NN__max_iter : 59;<br>NN__random_state : 0; NN__solver : adam                                                                                    | 0.70826  | 0.701019 |
| RF  | MM       | SMOTE    | RF__class_weight : None; RF__criterion : gini;<br>RF__max_depth : 2; RF__max_features : 9;<br>RF__min_samples_leaf : 1; RF__n_estimators : 540;<br>RF__random_state : 0                                                         | 0.708235 | 0.75109  |
| RF  | Not used | Not used | RF__class_weight : None; RF__criterion : log_loss;<br>RF__max_depth : 3; RF__max_features : 1;<br>RF__min_samples_leaf : 2; RF__n_estimators : 1000;<br>RF__random_state : 41                                                   | 0.707699 | 0.802826 |
| XGB | SS       | SMOTE    | XGB__colsample_bytree : 1.0; XGB__gamma :<br>3.7851564085172176; XGB__max_depth : 1;<br>XGB__min_child_weight : 6.240836183879521;<br>XGB__random_state : 0; XGB__scale_pos_weight :<br>3.773237969910909; XGB__subsample : 0.9 | 0.707403 | 0.766053 |
| RF  | Not used | Not used | RF__class_weight : None; RF__criterion : gini;<br>RF__max_depth : 2; RF__max_features : 1;<br>RF__min_samples_leaf : 2; RF__n_estimators : 433;<br>RF__random_state : 72                                                        | 0.707289 | 0.772737 |

|    |          |          |                                                                                                                                                                                |          |          |
|----|----------|----------|--------------------------------------------------------------------------------------------------------------------------------------------------------------------------------|----------|----------|
| RF | MM       | SMOTE    | RF__class_weight : None; RF__criterion : gini;<br>RF__max_depth : 2; RF__max_features : 7;<br>RF__min_samples_leaf : 1; RF__n_estimators : 1000;<br>RF__random_state : 2       | 0.707221 | 0.751897 |
| RF | SS       | ADASYN   | RF__class_weight : None; RF__criterion : gini;<br>RF__max_depth : 3; RF__max_features : 1;<br>RF__min_samples_leaf : 1; RF__n_estimators : 500;<br>RF__random_state : 5        | 0.707154 | 0.792279 |
| RF | MM       | ADASYN   | RF__class_weight : None; RF__criterion : gini;<br>RF__max_depth : 3; RF__max_features : 9;<br>RF__min_samples_leaf : 1; RF__n_estimators : 558;<br>RF__random_state : 59       | 0.706985 | 0.785991 |
| RF | MM       | ADASYN   | RF__class_weight : None; RF__criterion : gini;<br>RF__max_depth : 3; RF__max_features : 7;<br>RF__min_samples_leaf : 2; RF__n_estimators : 1000;<br>RF__random_state : 0       | 0.706915 | 0.784632 |
| RF | SS       | ADASYN   | RF__class_weight : None; RF__criterion : gini;<br>RF__max_depth : 3; RF__max_features : 1;<br>RF__min_samples_leaf : 2; RF__n_estimators : 305;<br>RF__random_state : 60       | 0.706758 | 0.789179 |
| RF | Not used | Not used | RF__class_weight : None; RF__criterion : gini;<br>RF__max_depth : 3; RF__max_features : 1;<br>RF__min_samples_leaf : 2; RF__n_estimators : 1000;<br>RF__random_state : 0       | 0.706649 | 0.801521 |
| RF | Not used | Not used | RF__class_weight : None; RF__criterion : log_loss;<br>RF__max_depth : 3; RF__max_features : 1;<br>RF__min_samples_leaf : 2; RF__n_estimators : 1000;<br>RF__random_state : 100 | 0.706546 | 0.802347 |
| RF | SS       | ADASYN   | RF__class_weight : None; RF__criterion : log_loss;<br>RF__max_depth : 3; RF__max_features : 1;                                                                                 | 0.706462 | 0.791803 |

|    |          |          |                                                                                                                                                                                            |          |          |
|----|----------|----------|--------------------------------------------------------------------------------------------------------------------------------------------------------------------------------------------|----------|----------|
|    |          |          | RF__min_samples_leaf : 1; RF__n_estimators : 967;<br>RF__random_state : 11                                                                                                                 |          |          |
| RF | SS       | SMOTE    | RF__class_weight : balanced_subsample;<br>RF__criterion : log_loss; RF__max_depth : 3;<br>RF__max_features : 1; RF__min_samples_leaf : 2;<br>RF__n_estimators : 329; RF__random_state : 98 | 0.706257 | 0.787812 |
| RF | Not used | Not used | RF__class_weight : None; RF__criterion : log_loss;<br>RF__max_depth : 3; RF__max_features : 1;<br>RF__min_samples_leaf : 2; RF__n_estimators : 499;<br>RF__random_state : 100              | 0.706166 | 0.802518 |
| RF | MM       | ADASYN   | RF__class_weight : balanced; RF__criterion : gini;<br>RF__max_depth : 3; RF__max_features : 6;<br>RF__min_samples_leaf : 4; RF__n_estimators : 300;<br>RF__random_state : 84               | 0.706139 | 0.780628 |
| RF | MM       | SMOTE    | RF__class_weight : balanced_subsample;<br>RF__criterion : gini; RF__max_depth : 2;<br>RF__max_features : 9; RF__min_samples_leaf : 1;<br>RF__n_estimators : 991; RF__random_state : 21     | 0.706136 | 0.75292  |
| RF | SS       | ADASYN   | RF__class_weight : None; RF__criterion : gini;<br>RF__max_depth : 3; RF__max_features : 1;<br>RF__min_samples_leaf : 3; RF__n_estimators : 341;<br>RF__random_state : 33                   | 0.706015 | 0.789281 |
| RF | SS       | SMOTE    | RF__class_weight : balanced_subsample;<br>RF__criterion : gini; RF__max_depth : 2;<br>RF__max_features : 8; RF__min_samples_leaf : 1;<br>RF__n_estimators : 713; RF__random_state : 90     | 0.705944 | 0.753496 |
| RF | Not used | Not used | RF__class_weight : balanced; RF__criterion : log_loss;<br>RF__max_depth : 3; RF__max_features : 1;<br>RF__min_samples_leaf : 1; RF__n_estimators : 1000;<br>RF__random_state : 43          | 0.705893 | 0.804836 |

|    |          |          |                                                                                                                                                                                |          |          |
|----|----------|----------|--------------------------------------------------------------------------------------------------------------------------------------------------------------------------------|----------|----------|
| RF | SS       | ADASYN   | RF__class_weight : None; RF__criterion : gini;<br>RF__max_depth : 3; RF__max_features : 1;<br>RF__min_samples_leaf : 1; RF__n_estimators : 1000;<br>RF__random_state : 100     | 0.705706 | 0.791993 |
| RF | Not used | Not used | RF__class_weight : None; RF__criterion : gini;<br>RF__max_depth : 3; RF__max_features : 1;<br>RF__min_samples_leaf : 2; RF__n_estimators : 392;<br>RF__random_state : 100      | 0.70558  | 0.801651 |
| RF | Not used | Not used | RF__class_weight : None; RF__criterion : log_loss;<br>RF__max_depth : 3; RF__max_features : 1;<br>RF__min_samples_leaf : 1; RF__n_estimators : 643;<br>RF__random_state : 6    | 0.705547 | 0.80434  |
| RF | Not used | Not used | RF__class_weight : None; RF__criterion : log_loss;<br>RF__max_depth : 3; RF__max_features : 1;<br>RF__min_samples_leaf : 3; RF__n_estimators : 1000;<br>RF__random_state : 100 | 0.70546  | 0.800107 |
| RF | SS       | ADASYN   | RF__class_weight : None; RF__criterion : gini;<br>RF__max_depth : 3; RF__max_features : 1;<br>RF__min_samples_leaf : 1; RF__n_estimators : 1000;<br>RF__random_state : 95      | 0.705447 | 0.791467 |
| RF | MM       | ADASYN   | RF__class_weight : balanced; RF__criterion : gini;<br>RF__max_depth : 3; RF__max_features : 7;<br>RF__min_samples_leaf : 1; RF__n_estimators : 1000;<br>RF__random_state : 27  | 0.705434 | 0.787929 |
| RF | MM       | SMOTE    | RF__class_weight : None; RF__criterion : gini;<br>RF__max_depth : 2; RF__max_features : 5;<br>RF__min_samples_leaf : 3; RF__n_estimators : 875;<br>RF__random_state : 17       | 0.705413 | 0.750186 |
| RF | SS       | SMOTE    | RF__class_weight : balanced_subsample;<br>RF__criterion : gini; RF__max_depth : 2;                                                                                             | 0.705325 | 0.752564 |



|     |          |          |                                                                                                                                                                                                                                                   |          |          |
|-----|----------|----------|---------------------------------------------------------------------------------------------------------------------------------------------------------------------------------------------------------------------------------------------------|----------|----------|
|     |          |          | RF__max_features : 9; RF__min_samples_leaf : 2;<br>RF__n_estimators : 328; RF__random_state : 94                                                                                                                                                  |          |          |
| RF  | Not used | Not used | RF__class_weight : None; RF__criterion : gini;<br>RF__max_depth : 4; RF__max_features : 1;<br>RF__min_samples_leaf : 1; RF__n_estimators : 1000;<br>RF__random_state : 47                                                                         | 0.70529  | 0.840891 |
| XGB | MM       | ROS      | XGB__colsample_bytree : 1.0; XGB__gamma :<br>16.163930617339958; XGB__max_depth : 1;<br>XGB__min_child_weight : 12.12990798989308;<br>XGB__random_state : 0; XGB__scale_pos_weight :<br>4.457452531197775; XGB__subsample :<br>0.7710463290923624 | 0.705242 | 0.735828 |
| RF  | MM       | SMOTE    | RF__class_weight : balanced; RF__criterion : gini;<br>RF__max_depth : 2; RF__max_features : 9;<br>RF__min_samples_leaf : 1; RF__n_estimators : 368;<br>RF__random_state : 88                                                                      | 0.705086 | 0.75332  |
| RF  | Not used | Not used | RF__class_weight : None; RF__criterion : gini;<br>RF__max_depth : 3; RF__max_features : 1;<br>RF__min_samples_leaf : 3; RF__n_estimators : 1000;<br>RF__random_state : 0                                                                          | 0.705065 | 0.798511 |
| RF  | Not used | Not used | RF__class_weight : None; RF__criterion : log_loss;<br>RF__max_depth : 3; RF__max_features : 1;<br>RF__min_samples_leaf : 1; RF__n_estimators : 1000;<br>RF__random_state : 0                                                                      | 0.704995 | 0.804406 |
| RF  | MM       | ADASYN   | RF__class_weight : balanced; RF__criterion : gini;<br>RF__max_depth : 3; RF__max_features : 9;<br>RF__min_samples_leaf : 1; RF__n_estimators : 552;<br>RF__random_state : 31                                                                      | 0.704969 | 0.788347 |
| RF  | SS       | ADASYN   | RF__class_weight : None; RF__criterion : gini;<br>RF__max_depth : 3; RF__max_features : 1;                                                                                                                                                        | 0.704829 | 0.792973 |

|    |    |        |                                                                                                                                                                                         |          |          |
|----|----|--------|-----------------------------------------------------------------------------------------------------------------------------------------------------------------------------------------|----------|----------|
|    |    |        | RF__min_samples_leaf : 1; RF__n_estimators : 1000;<br>RF__random_state : 53                                                                                                             |          |          |
| RF | MM | SMOTE  | RF__class_weight : None; RF__criterion : gini;<br>RF__max_depth : 2; RF__max_features : 4;<br>RF__min_samples_leaf : 1; RF__n_estimators : 961;<br>RF__random_state : 10                | 0.704726 | 0.75211  |
| RF | SS | ADASYN | RF__class_weight : None; RF__criterion : log_loss;<br>RF__max_depth : 2; RF__max_features : 1;<br>RF__min_samples_leaf : 1; RF__n_estimators : 861;<br>RF__random_state : 61            | 0.704726 | 0.763041 |
| RF | MM | ADASYN | RF__class_weight : balanced_subsample;<br>RF__criterion : gini; RF__max_depth : 3;<br>RF__max_features : 4; RF__min_samples_leaf : 1;<br>RF__n_estimators : 300; RF__random_state : 100 | 0.704691 | 0.788642 |
| RF | MM | ADASYN | RF__class_weight : balanced; RF__criterion : log_loss;<br>RF__max_depth : 2; RF__max_features : 1;<br>RF__min_samples_leaf : 1; RF__n_estimators : 300;<br>RF__random_state : 85        | 0.704677 | 0.759364 |
| RF | MM | ADASYN | RF__class_weight : balanced; RF__criterion : gini;<br>RF__max_depth : 3; RF__max_features : 5;<br>RF__min_samples_leaf : 2; RF__n_estimators : 1000;<br>RF__random_state : 0            | 0.704642 | 0.785165 |
| RF | MM | SMOTE  | RF__class_weight : balanced; RF__criterion : gini;<br>RF__max_depth : 2; RF__max_features : 4;<br>RF__min_samples_leaf : 1; RF__n_estimators : 949;<br>RF__random_state : 83            | 0.704552 | 0.750599 |
| RF | MM | SMOTE  | RF__class_weight : None; RF__criterion : gini;<br>RF__max_depth : 2; RF__max_features : 7;<br>RF__min_samples_leaf : 1; RF__n_estimators : 861;<br>RF__random_state : 92                | 0.704465 | 0.751463 |

|    |    |        |                                                                                                                                                                                  |          |          |
|----|----|--------|----------------------------------------------------------------------------------------------------------------------------------------------------------------------------------|----------|----------|
| RF | MM | ADASYN | RF__class_weight : balanced; RF__criterion : gini;<br>RF__max_depth : 3; RF__max_features : 9;<br>RF__min_samples_leaf : 1; RF__n_estimators : 1000;<br>RF__random_state : 0     | 0.704332 | 0.788509 |
| RF | MM | ADASYN | RF__class_weight : None; RF__criterion : gini;<br>RF__max_depth : 3; RF__max_features : 2;<br>RF__min_samples_leaf : 3; RF__n_estimators : 300;<br>RF__random_state : 95         | 0.704257 | 0.785451 |
| RF | MM | ADASYN | RF__class_weight : None; RF__criterion : gini;<br>RF__max_depth : 3; RF__max_features : 9;<br>RF__min_samples_leaf : 1; RF__n_estimators : 1000;<br>RF__random_state : 0         | 0.704247 | 0.788107 |
| RF | SS | ADASYN | RF__class_weight : None; RF__criterion : gini;<br>RF__max_depth : 3; RF__max_features : 1;<br>RF__min_samples_leaf : 1; RF__n_estimators : 1000;<br>RF__random_state : 37        | 0.704244 | 0.79328  |
| RF | SS | ADASYN | RF__class_weight : None; RF__criterion : log_loss;<br>RF__max_depth : 3; RF__max_features : 1;<br>RF__min_samples_leaf : 1; RF__n_estimators : 1000;<br>RF__random_state : 0     | 0.704242 | 0.790797 |
| RF | SS | ADASYN | RF__class_weight : balanced; RF__criterion : log_loss;<br>RF__max_depth : 3; RF__max_features : 1;<br>RF__min_samples_leaf : 2; RF__n_estimators : 1000;<br>RF__random_state : 0 | 0.70424  | 0.789084 |
| RF | SS | ADASYN | RF__class_weight : balanced; RF__criterion : log_loss;<br>RF__max_depth : 2; RF__max_features : 1;<br>RF__min_samples_leaf : 5; RF__n_estimators : 633;<br>RF__random_state : 62 | 0.704194 | 0.760584 |
| RF | SS | ADASYN | RF__class_weight : balanced; RF__criterion : log_loss;<br>RF__max_depth : 4; RF__max_features : 9;                                                                               | 0.704096 | 0.826472 |

|     |    |        |                                                                                                                                                                                                                                |          |          |
|-----|----|--------|--------------------------------------------------------------------------------------------------------------------------------------------------------------------------------------------------------------------------------|----------|----------|
|     |    |        | RF__min_samples_leaf : 1; RF__n_estimators : 709;<br>RF__random_state : 100                                                                                                                                                    |          |          |
| RF  | MM | ADASYN | RF__class_weight : None; RF__criterion : gini;<br>RF__max_depth : 2; RF__max_features : 1;<br>RF__min_samples_leaf : 5; RF__n_estimators : 743;<br>RF__random_state : 24                                                       | 0.704057 | 0.760253 |
| RF  | SS | ADASYN | RF__class_weight : None; RF__criterion : gini;<br>RF__max_depth : 3; RF__max_features : 1;<br>RF__min_samples_leaf : 1; RF__n_estimators : 795;<br>RF__random_state : 99                                                       | 0.703988 | 0.793396 |
| XGB | SS | SMOTE  | XGB__colsample_bytree : 1.0; XGB__gamma :<br>4.254911587555754; XGB__max_depth : 1;<br>XGB__min_child_weight : 9.338139007486001;<br>XGB__random_state : 0; XGB__scale_pos_weight :<br>4.158272306235727; XGB__subsample : 0.9 | 0.703949 | 0.754206 |
| RF  | MM | ADASYN | RF__class_weight : balanced; RF__criterion : gini;<br>RF__max_depth : 3; RF__max_features : 5;<br>RF__min_samples_leaf : 2; RF__n_estimators : 934;<br>RF__random_state : 0                                                    | 0.703885 | 0.785167 |
| RF  | MM | SMOTE  | RF__class_weight : balanced; RF__criterion : gini;<br>RF__max_depth : 2; RF__max_features : 9;<br>RF__min_samples_leaf : 1; RF__n_estimators : 875;<br>RF__random_state : 21                                                   | 0.70388  | 0.752373 |
| RF  | MM | SMOTE  | RF__class_weight : balanced; RF__criterion : gini;<br>RF__max_depth : 2; RF__max_features : 9;<br>RF__min_samples_leaf : 1; RF__n_estimators : 744;<br>RF__random_state : 7                                                    | 0.703742 | 0.75174  |
| RF  | SS | ADASYN | RF__class_weight : None; RF__criterion : gini;<br>RF__max_depth : 3; RF__max_features : 1;<br>RF__min_samples_leaf : 1; RF__n_estimators : 541;<br>RF__random_state : 4                                                        | 0.703709 | 0.791167 |

|    |          |          |                                                                                                                                                                                            |          |          |
|----|----------|----------|--------------------------------------------------------------------------------------------------------------------------------------------------------------------------------------------|----------|----------|
| RF | SS       | ADASYN   | RF__class_weight : None; RF__criterion : log_loss;<br>RF__max_depth : 3; RF__max_features : 1;<br>RF__min_samples_leaf : 1; RF__n_estimators : 329;<br>RF__random_state : 47               | 0.703689 | 0.79016  |
| RF | SS       | ADASYN   | RF__class_weight : balanced; RF__criterion : gini;<br>RF__max_depth : 2; RF__max_features : 1;<br>RF__min_samples_leaf : 1; RF__n_estimators : 943;<br>RF__random_state : 87               | 0.703689 | 0.761277 |
| RF | Not used | Not used | RF__class_weight : balanced_subsample;<br>RF__criterion : log_loss; RF__max_depth : 3;<br>RF__max_features : 1; RF__min_samples_leaf : 1;<br>RF__n_estimators : 599; RF__random_state : 97 | 0.703688 | 0.803944 |
| RF | MM       | ADASYN   | RF__class_weight : balanced_subsample;<br>RF__criterion : gini; RF__max_depth : 3;<br>RF__max_features : 4; RF__min_samples_leaf : 3;<br>RF__n_estimators : 319; RF__random_state : 6      | 0.703675 | 0.784502 |
| RF | SS       | ADASYN   | RF__class_weight : None; RF__criterion : gini;<br>RF__max_depth : 3; RF__max_features : 1;<br>RF__min_samples_leaf : 1; RF__n_estimators : 382;<br>RF__random_state : 100                  | 0.703673 | 0.791778 |
| RF | SS       | ADASYN   | RF__class_weight : None; RF__criterion : log_loss;<br>RF__max_depth : 3; RF__max_features : 1;<br>RF__min_samples_leaf : 3; RF__n_estimators : 312;<br>RF__random_state : 28               | 0.703622 | 0.787261 |
| RF | Not used | Not used | RF__class_weight : None; RF__criterion : log_loss;<br>RF__max_depth : 3; RF__max_features : 2;<br>RF__min_samples_leaf : 1; RF__n_estimators : 753;<br>RF__random_state : 81               | 0.703617 | 0.807143 |
| RF | MM       | ADASYN   | RF__class_weight : balanced; RF__criterion : gini;<br>RF__max_depth : 3; RF__max_features : 5;                                                                                             | 0.703575 | 0.784301 |

|     |    |        |                                                                                                                                                                                                                  |          |          |
|-----|----|--------|------------------------------------------------------------------------------------------------------------------------------------------------------------------------------------------------------------------|----------|----------|
|     |    |        | RF__min_samples_leaf : 2; RF__n_estimators : 906;<br>RF__random_state : 100                                                                                                                                      |          |          |
| RF  | SS | ADASYN | RF__class_weight : None; RF__criterion : log_loss;<br>RF__max_depth : 4; RF__max_features : 6;<br>RF__min_samples_leaf : 1; RF__n_estimators : 972;<br>RF__random_state : 22                                     | 0.703545 | 0.828357 |
| RF  | MM | ADASYN | RF__class_weight : balanced; RF__criterion : gini;<br>RF__max_depth : 3; RF__max_features : 7;<br>RF__min_samples_leaf : 1; RF__n_estimators : 308;<br>RF__random_state : 38                                     | 0.703539 | 0.788739 |
| XGB | SS | SMOTE  | XGB__colsample_bytree : 1.0; XGB__gamma :<br>4.918964170968306; XGB__max_depth : 1;<br>XGB__min_child_weight : 6.140280281648867;<br>XGB__random_state : 0; XGB__scale_pos_weight : 5.0;<br>XGB__subsample : 0.9 | 0.703538 | 0.763194 |
| RF  | SS | ADASYN | RF__class_weight : None; RF__criterion : gini;<br>RF__max_depth : 2; RF__max_features : 1;<br>RF__min_samples_leaf : 2; RF__n_estimators : 319;<br>RF__random_state : 23                                         | 0.703418 | 0.764297 |
| XGB | SS | ADASYN | XGB__colsample_bytree : 0.1; XGB__gamma :<br>1.594651861223503; XGB__max_depth : 1;<br>XGB__min_child_weight : 0.0; XGB__random_state :<br>0; XGB__scale_pos_weight : 0.5; XGB__subsample :<br>0.5               | 0.703389 | 0.762422 |
| RF  | MM | ADASYN | RF__class_weight : None; RF__criterion : gini;<br>RF__max_depth : 2; RF__max_features : 1;<br>RF__min_samples_leaf : 2; RF__n_estimators : 1000;<br>RF__random_state : 96                                        | 0.703265 | 0.762079 |
| RF  | MM | SMOTE  | RF__class_weight : None; RF__criterion : gini;<br>RF__max_depth : 2; RF__max_features : 9;                                                                                                                       | 0.70326  | 0.750593 |

|    |          |          |                                                                                                                                                                                  |          |          |
|----|----------|----------|----------------------------------------------------------------------------------------------------------------------------------------------------------------------------------|----------|----------|
|    |          |          | RF__min_samples_leaf : 3; RF__n_estimators : 948;<br>RF__random_state : 48                                                                                                       |          |          |
| RF | MM       | ADASYN   | RF__class_weight : balanced; RF__criterion : log_loss;<br>RF__max_depth : 3; RF__max_features : 7;<br>RF__min_samples_leaf : 1; RF__n_estimators : 825;<br>RF__random_state : 34 | 0.703211 | 0.780729 |
| RF | Not used | Not used | RF__class_weight : None; RF__criterion : gini;<br>RF__max_depth : 3; RF__max_features : 1;<br>RF__min_samples_leaf : 2; RF__n_estimators : 702;<br>RF__random_state : 52         | 0.703204 | 0.801771 |
| RF | MM       | ROS      | RF__class_weight : None; RF__criterion : gini;<br>RF__max_depth : 4; RF__max_features : 1;<br>RF__min_samples_leaf : 8; RF__n_estimators : 461;<br>RF__random_state : 37         | 0.703101 | 0.802869 |
| RF | Not used | Not used | RF__class_weight : None; RF__criterion : log_loss;<br>RF__max_depth : 3; RF__max_features : 1;<br>RF__min_samples_leaf : 3; RF__n_estimators : 300;<br>RF__random_state : 100    | 0.703052 | 0.799255 |
| RF | MM       | SMOTE    | RF__class_weight : None; RF__criterion : gini;<br>RF__max_depth : 2; RF__max_features : 7;<br>RF__min_samples_leaf : 1; RF__n_estimators : 1000;<br>RF__random_state : 98        | 0.703002 | 0.753186 |
| RF | MM       | ADASYN   | RF__class_weight : balanced; RF__criterion : gini;<br>RF__max_depth : 3; RF__max_features : 6;<br>RF__min_samples_leaf : 2; RF__n_estimators : 614;<br>RF__random_state : 3      | 0.702955 | 0.784903 |
| RF | MM       | SMOTE    | RF__class_weight : balanced; RF__criterion : log_loss;<br>RF__max_depth : 2; RF__max_features : 6;<br>RF__min_samples_leaf : 1; RF__n_estimators : 770;<br>RF__random_state : 4  | 0.702951 | 0.748434 |

|    |          |          |                                                                                                                                                                                             |          |          |
|----|----------|----------|---------------------------------------------------------------------------------------------------------------------------------------------------------------------------------------------|----------|----------|
| RF | Not used | Not used | RF__class_weight : balanced; RF__criterion : log_loss;<br>RF__max_depth : 4; RF__max_features : 1;<br>RF__min_samples_leaf : 2; RF__n_estimators : 519;<br>RF__random_state : 67            | 0.702893 | 0.833733 |
| RF | MM       | SMOTE    | RF__class_weight : None; RF__criterion : gini;<br>RF__max_depth : 2; RF__max_features : 7;<br>RF__min_samples_leaf : 1; RF__n_estimators : 1000;<br>RF__random_state : 57                   | 0.702812 | 0.753995 |
| RF | SS       | ADASYN   | RF__class_weight : None; RF__criterion : log_loss;<br>RF__max_depth : 3; RF__max_features : 1;<br>RF__min_samples_leaf : 1; RF__n_estimators : 951;<br>RF__random_state : 95                | 0.702794 | 0.790368 |
| RF | Not used | Not used | RF__class_weight : None; RF__criterion : gini;<br>RF__max_depth : 4; RF__max_features : 1;<br>RF__min_samples_leaf : 2; RF__n_estimators : 300;<br>RF__random_state : 100                   | 0.702793 | 0.833302 |
| RF | Not used | Not used | RF__class_weight : None; RF__criterion : log_loss;<br>RF__max_depth : 2; RF__max_features : 1;<br>RF__min_samples_leaf : 2; RF__n_estimators : 478;<br>RF__random_state : 100               | 0.702724 | 0.774631 |
| RF | MM       | ADASYN   | RF__class_weight : balanced_subsample;<br>RF__criterion : gini; RF__max_depth : 3;<br>RF__max_features : 6; RF__min_samples_leaf : 1;<br>RF__n_estimators : 300; RF__random_state : 77      | 0.702571 | 0.788948 |
| RF | Not used | Not used | RF__class_weight : balanced_subsample;<br>RF__criterion : log_loss; RF__max_depth : 3;<br>RF__max_features : 1; RF__min_samples_leaf : 3;<br>RF__n_estimators : 580; RF__random_state : 100 | 0.702484 | 0.797556 |
| RF | MM       | ROS      | RF__class_weight : None; RF__criterion : gini;<br>RF__max_depth : 4; RF__max_features : 1;                                                                                                  | 0.702292 | 0.814823 |



|     |    |        |                                                                                                                                                                                                                               |          |          |
|-----|----|--------|-------------------------------------------------------------------------------------------------------------------------------------------------------------------------------------------------------------------------------|----------|----------|
|     |    |        | RF__min_samples_leaf : 5; RF__n_estimators : 1000;<br>RF__random_state : 100                                                                                                                                                  |          |          |
| RF  | SS | ADASYN | RF__class_weight : None; RF__criterion : gini;<br>RF__max_depth : 3; RF__max_features : 1;<br>RF__min_samples_leaf : 2; RF__n_estimators : 300;<br>RF__random_state : 0                                                       | 0.702178 | 0.790969 |
| RF  | SS | ADASYN | RF__class_weight : balanced; RF__criterion : gini;<br>RF__max_depth : 3; RF__max_features : 1;<br>RF__min_samples_leaf : 1; RF__n_estimators : 322;<br>RF__random_state : 2                                                   | 0.70216  | 0.790411 |
| XGB | SS | SMOTE  | XGB__colsample_bytree : 1.0; XGB__gamma :<br>3.75538505665694; XGB__max_depth : 1;<br>XGB__min_child_weight : 6.034763897106964;<br>XGB__random_state : 0; XGB__scale_pos_weight :<br>3.500199914633356; XGB__subsample : 0.9 | 0.702126 | 0.765963 |
| RF  | MM | ADASYN | RF__class_weight : None; RF__criterion : gini;<br>RF__max_depth : 3; RF__max_features : 1;<br>RF__min_samples_leaf : 1; RF__n_estimators : 1000;<br>RF__random_state : 99                                                     | 0.702038 | 0.795098 |
| RF  | SS | ADASYN | RF__class_weight : None; RF__criterion : log_loss;<br>RF__max_depth : 2; RF__max_features : 1;<br>RF__min_samples_leaf : 2; RF__n_estimators : 1000;<br>RF__random_state : 0                                                  | 0.702023 | 0.761531 |
| RF  | MM | SMOTE  | RF__class_weight : balanced_subsample;<br>RF__criterion : gini; RF__max_depth : 2;<br>RF__max_features : 9; RF__min_samples_leaf : 1;<br>RF__n_estimators : 300; RF__random_state : 58                                        | 0.701952 | 0.750641 |
| RF  | SS | ADASYN | RF__class_weight : balanced; RF__criterion : log_loss;<br>RF__max_depth : 4; RF__max_features : 6;<br>RF__min_samples_leaf : 2; RF__n_estimators : 456;<br>RF__random_state : 29                                              | 0.70192  | 0.819471 |

|     |          |          |                                                                                                                                                                                                                                |          |          |
|-----|----------|----------|--------------------------------------------------------------------------------------------------------------------------------------------------------------------------------------------------------------------------------|----------|----------|
| RF  | MM       | SMOTE    | RF__class_weight : None; RF__criterion : gini;<br>RF__max_depth : 2; RF__max_features : 7;<br>RF__min_samples_leaf : 1; RF__n_estimators : 861;<br>RF__random_state : 7                                                        | 0.701832 | 0.751883 |
| XGB | SS       | SMOTE    | XGB__colsample_bytree : 1.0; XGB__gamma :<br>4.296914398874771; XGB__max_depth : 1;<br>XGB__min_child_weight : 8.913657735308098;<br>XGB__random_state : 0; XGB__scale_pos_weight :<br>4.126980830609001; XGB__subsample : 0.9 | 0.701796 | 0.755303 |
| RF  | MM       | SMOTE    | RF__class_weight : balanced_subsample;<br>RF__criterion : gini; RF__max_depth : 2;<br>RF__max_features : 7; RF__min_samples_leaf : 1;<br>RF__n_estimators : 1000; RF__random_state : 18                                        | 0.70171  | 0.752147 |
| RF  | SS       | SMOTE    | RF__class_weight : balanced; RF__criterion : log_loss;<br>RF__max_depth : 2; RF__max_features : 1;<br>RF__min_samples_leaf : 1; RF__n_estimators : 344;<br>RF__random_state : 98                                               | 0.701708 | 0.762454 |
| RF  | SS       | ADASYN   | RF__class_weight : balanced_subsample;<br>RF__criterion : log_loss; RF__max_depth : 4;<br>RF__max_features : 7; RF__min_samples_leaf : 1;<br>RF__n_estimators : 300; RF__random_state : 100                                    | 0.701699 | 0.8264   |
| XGB | SS       | ADASYN   | XGB__colsample_bytree : 1.0; XGB__gamma :<br>4.241222837982958; XGB__max_depth : 1;<br>XGB__min_child_weight : 0.0; XGB__random_state :<br>0; XGB__scale_pos_weight : 0.5; XGB__subsample :<br>0.5                             | 0.701681 | 0.754004 |
| RF  | Not used | Not used | RF__class_weight : None; RF__criterion : log_loss;<br>RF__max_depth : 4; RF__max_features : 1;<br>RF__min_samples_leaf : 3; RF__n_estimators : 300;<br>RF__random_state : 100                                                  | 0.701484 | 0.826848 |

|     |    |        |                                                                                                                                                                                                                                |          |          |
|-----|----|--------|--------------------------------------------------------------------------------------------------------------------------------------------------------------------------------------------------------------------------------|----------|----------|
| RF  | MM | SMOTE  | RF__class_weight : None; RF__criterion : gini;<br>RF__max_depth : 2; RF__max_features : 3;<br>RF__min_samples_leaf : 1; RF__n_estimators : 300;<br>RF__random_state : 15                                                       | 0.701471 | 0.75359  |
| XGB | SS | SMOTE  | XGB__colsample_bytree : 1.0; XGB__gamma :<br>4.678879243752123; XGB__max_depth : 1;<br>XGB__min_child_weight : 8.899688149760228;<br>XGB__random_state : 0; XGB__scale_pos_weight :<br>4.129583662828905; XGB__subsample : 0.9 | 0.70145  | 0.754521 |
| RF  | SS | ADASYN | RF__class_weight : None; RF__criterion : log_loss;<br>RF__max_depth : 3; RF__max_features : 9;<br>RF__min_samples_leaf : 1; RF__n_estimators : 365;<br>RF__random_state : 98                                                   | 0.701436 | 0.785229 |
| RF  | SS | ADASYN | RF__class_weight : None; RF__criterion : gini;<br>RF__max_depth : 3; RF__max_features : 1;<br>RF__min_samples_leaf : 1; RF__n_estimators : 1000;<br>RF__random_state : 0                                                       | 0.70135  | 0.791876 |
| NN  | SS | ROS    | NN__activation : logistic; NN__alpha :<br>0.00010041313053825191; NN__hidden_layer_sizes :<br>50; NN__max_iter : 500; NN__random_state : 0;<br>NN__solver : adam                                                               | 0.701282 | 0.702622 |
| RF  | SS | ADASYN | RF__class_weight : balanced; RF__criterion : gini;<br>RF__max_depth : 3; RF__max_features : 1;<br>RF__min_samples_leaf : 2; RF__n_estimators : 934;<br>RF__random_state : 82                                                   | 0.70111  | 0.789951 |
| RF  | MM | ADASYN | RF__class_weight : balanced; RF__criterion : gini;<br>RF__max_depth : 3; RF__max_features : 6;<br>RF__min_samples_leaf : 4; RF__n_estimators : 760;<br>RF__random_state : 1                                                    | 0.701092 | 0.781822 |
| XGB | SS | SMOTE  | XGB__colsample_bytree : 1.0; XGB__gamma :<br>4.764505060102767; XGB__max_depth : 1;                                                                                                                                            | 0.701007 | 0.762859 |

|     |          |          |                                                                                                                                                                                                                                                   |          |          |
|-----|----------|----------|---------------------------------------------------------------------------------------------------------------------------------------------------------------------------------------------------------------------------------------------------|----------|----------|
|     |          |          | XGB__min_child_weight : 6.4262652449332105;<br>XGB__random_state : 0; XGB__scale_pos_weight : 5.0;<br>XGB__subsample : 0.9                                                                                                                        |          |          |
| RF  | MM       | ADASYN   | RF__class_weight : balanced; RF__criterion : gini;<br>RF__max_depth : 3; RF__max_features : 7;<br>RF__min_samples_leaf : 1; RF__n_estimators : 1000;<br>RF__random_state : 43                                                                     | 0.700994 | 0.78866  |
| XGB | SS       | SMOTE    | XGB__colsample_bytree : 1.0; XGB__gamma :<br>3.872504674892467; XGB__max_depth : 1;<br>XGB__min_child_weight : 9.855428640015464;<br>XGB__random_state : 0; XGB__scale_pos_weight : 5.0;<br>XGB__subsample : 0.9                                  | 0.700986 | 0.75538  |
| XGB | SS       | ADASYN   | XGB__colsample_bytree : 1.0; XGB__gamma :<br>4.7626566805308155; XGB__max_depth : 1;<br>XGB__min_child_weight : 0.0; XGB__random_state :<br>0; XGB__scale_pos_weight : 0.5; XGB__subsample :<br>0.5                                               | 0.700892 | 0.742186 |
| XGB | Not used | Not used | XGB__colsample_bytree : 0.4915354427214047;<br>XGB__gamma : 5.265304807725755;<br>XGB__max_depth : 2; XGB__min_child_weight : 0.0;<br>XGB__random_state : 0; XGB__scale_pos_weight :<br>2.7840629929455236; XGB__subsample :<br>0.899342467100523 | 0.700844 | 0.806561 |
| XGB | MM       | SMOTE    | XGB__colsample_bytree : 0.7551049404234403;<br>XGB__gamma : 4.751256572397854;<br>XGB__max_depth : 1; XGB__min_child_weight : 0.0;<br>XGB__random_state : 0; XGB__scale_pos_weight :<br>3.827959148451575; XGB__subsample :<br>0.8414529617618633 | 0.700812 | 0.768316 |
| RF  | MM       | ROS      | RF__class_weight : balanced; RF__criterion : gini;<br>RF__max_depth : 3; RF__max_features : 1;                                                                                                                                                    | 0.700762 | 0.795797 |

|     |          |          |                                                                                                                                                                                                                                 |          |          |
|-----|----------|----------|---------------------------------------------------------------------------------------------------------------------------------------------------------------------------------------------------------------------------------|----------|----------|
|     |          |          | RF__min_samples_leaf : 2; RF__n_estimators : 896;<br>RF__random_state : 5                                                                                                                                                       |          |          |
| XGB | Not used | Not used | XGB__colsample_bytree : 1.0; XGB__gamma :<br>8.135617307096926; XGB__max_depth : 1;<br>XGB__min_child_weight : 0.0; XGB__random_state :<br>0; XGB__scale_pos_weight : 3.1186247273806336;<br>XGB__subsample : 0.9               | 0.700717 | 0.753496 |
| RF  | MM       | ADASYN   | RF__class_weight : None; RF__criterion : log_loss;<br>RF__max_depth : 2; RF__max_features : 1;<br>RF__min_samples_leaf : 1; RF__n_estimators : 820;<br>RF__random_state : 28                                                    | 0.700699 | 0.764065 |
| RF  | SS       | SMOTE    | RF__class_weight : None; RF__criterion : log_loss;<br>RF__max_depth : 3; RF__max_features : 4;<br>RF__min_samples_leaf : 1; RF__n_estimators : 304;<br>RF__random_state : 17                                                    | 0.700638 | 0.792976 |
| RF  | SS       | ROS      | RF__class_weight : balanced; RF__criterion : log_loss;<br>RF__max_depth : 5; RF__max_features : 1;<br>RF__min_samples_leaf : 4; RF__n_estimators : 558;<br>RF__random_state : 100                                               | 0.700485 | 0.842837 |
| XGB | SS       | SMOTE    | XGB__colsample_bytree : 1.0; XGB__gamma :<br>4.167097834109587; XGB__max_depth : 1;<br>XGB__min_child_weight : 5.641797887723928;<br>XGB__random_state : 0; XGB__scale_pos_weight :<br>3.6383028480816413; XGB__subsample : 0.9 | 0.700456 | 0.763653 |
| RF  | MM       | ADASYN   | RF__class_weight : balanced; RF__criterion : gini;<br>RF__max_depth : 3; RF__max_features : 1;<br>RF__min_samples_leaf : 2; RF__n_estimators : 310;<br>RF__random_state : 81                                                    | 0.700379 | 0.793482 |
| XGB | SS       | ADASYN   | XGB__colsample_bytree : 1.0; XGB__gamma :<br>4.276909823793428; XGB__max_depth : 1;<br>XGB__min_child_weight : 0.0; XGB__random_state :                                                                                         | 0.700308 | 0.75425  |

|     |          |          |                                                                                                                                                                                                                            |          |          |
|-----|----------|----------|----------------------------------------------------------------------------------------------------------------------------------------------------------------------------------------------------------------------------|----------|----------|
|     |          |          | 0; XGB__scale_pos_weight : 0.5; XGB__subsample : 0.5                                                                                                                                                                       |          |          |
| NN  | SS       | ROS      | NN__activation : logistic; NN__alpha : 10.0;<br>NN__hidden_layer_sizes : 50; NN__max_iter : 438;<br>NN__random_state : 0; NN__solver : adam                                                                                | 0.700284 | 0.701622 |
| XGB | SS       | SMOTE    | XGB__colsample_bytree : 1.0; XGB__gamma : 5.297030762745017; XGB__max_depth : 1;<br>XGB__min_child_weight : 4.878728139125758;<br>XGB__random_state : 0; XGB__scale_pos_weight : 3.5496428352971146; XGB__subsample : 0.9  | 0.700266 | 0.759412 |
| NN  | SS       | ADASYN   | NN__activation : logistic; NN__alpha : 0.0001;<br>NN__hidden_layer_sizes : 50; NN__max_iter : 50;<br>NN__random_state : 0; NN__solver : adam                                                                               | 0.700254 | 0.702179 |
| RF  | MM       | ADASYN   | RF__class_weight : balanced_subsample;<br>RF__criterion : gini; RF__max_depth : 3;<br>RF__max_features : 4; RF__min_samples_leaf : 3;<br>RF__n_estimators : 300; RF__random_state : 100                                    | 0.700248 | 0.783931 |
| RF  | MM       | SMOTE    | RF__class_weight : None; RF__criterion : log_loss;<br>RF__max_depth : 2; RF__max_features : 5;<br>RF__min_samples_leaf : 1; RF__n_estimators : 811;<br>RF__random_state : 99                                               | 0.700231 | 0.748211 |
| XGB | Not used | Not used | XGB__colsample_bytree : 1.0; XGB__gamma : 5.495324270671143; XGB__max_depth : 1;<br>XGB__min_child_weight : 0.0; XGB__random_state : 0; XGB__scale_pos_weight : 2.9836216372515407;<br>XGB__subsample : 0.6275159750982203 | 0.700056 | 0.779497 |
| RF  | MM       | ROS      | RF__class_weight : None; RF__criterion : gini;<br>RF__max_depth : 3; RF__max_features : 1;<br>RF__min_samples_leaf : 3; RF__n_estimators : 947;<br>RF__random_state : 100                                                  | 0.699749 | 0.794401 |

|     |    |        |                                                                                                                                                                                                                                |          |          |
|-----|----|--------|--------------------------------------------------------------------------------------------------------------------------------------------------------------------------------------------------------------------------------|----------|----------|
| RF  | MM | ROS    | RF__class_weight : None; RF__criterion : gini;<br>RF__max_depth : 3; RF__max_features : 1;<br>RF__min_samples_leaf : 8; RF__n_estimators : 932;<br>RF__random_state : 63                                                       | 0.699746 | 0.785585 |
| XGB | SS | SMOTE  | XGB__colsample_bytree : 1.0; XGB__gamma :<br>4.754108910429519; XGB__max_depth : 1;<br>XGB__min_child_weight : 7.676454933519953;<br>XGB__random_state : 0; XGB__scale_pos_weight :<br>4.140827317710019; XGB__subsample : 0.9 | 0.699702 | 0.757717 |
| RF  | MM | ROS    | RF__class_weight : balanced; RF__criterion : gini;<br>RF__max_depth : 4; RF__max_features : 1;<br>RF__min_samples_leaf : 6; RF__n_estimators : 1000;<br>RF__random_state : 100                                                 | 0.699657 | 0.810428 |
| RF  | MM | ROS    | RF__class_weight : balanced; RF__criterion : gini;<br>RF__max_depth : 2; RF__max_features : 1;<br>RF__min_samples_leaf : 1; RF__n_estimators : 1000;<br>RF__random_state : 100                                                 | 0.699611 | 0.766318 |
| RF  | MM | ADASYN | RF__class_weight : balanced; RF__criterion : gini;<br>RF__max_depth : 3; RF__max_features : 1;<br>RF__min_samples_leaf : 5; RF__n_estimators : 1000;<br>RF__random_state : 26                                                  | 0.699608 | 0.787001 |
| RF  | MM | ADASYN | RF__class_weight : balanced; RF__criterion : log_loss;<br>RF__max_depth : 3; RF__max_features : 4;<br>RF__min_samples_leaf : 4; RF__n_estimators : 300;<br>RF__random_state : 100                                              | 0.699574 | 0.778067 |
| XGB | SS | SMOTE  | XGB__colsample_bytree : 1.0; XGB__gamma :<br>4.140677302376605; XGB__max_depth : 1;<br>XGB__min_child_weight : 10.50933690138394;<br>XGB__random_state : 0; XGB__scale_pos_weight : 5.0;<br>XGB__subsample : 0.9               | 0.699451 | 0.754241 |

|     |    |        |                                                                                                                                                                                                                  |          |          |
|-----|----|--------|------------------------------------------------------------------------------------------------------------------------------------------------------------------------------------------------------------------|----------|----------|
| RF  | MM | ADASYN | RF__class_weight : None; RF__criterion : log_loss;<br>RF__max_depth : 3; RF__max_features : 9;<br>RF__min_samples_leaf : 1; RF__n_estimators : 318;<br>RF__random_state : 76                                     | 0.699403 | 0.781129 |
| RF  | MM | ROS    | RF__class_weight : None; RF__criterion : gini;<br>RF__max_depth : 4; RF__max_features : 1;<br>RF__min_samples_leaf : 5; RF__n_estimators : 368;<br>RF__random_state : 100                                        | 0.699246 | 0.814645 |
| RF  | SS | ROS    | RF__class_weight : balanced; RF__criterion : gini;<br>RF__max_depth : 2; RF__max_features : 1;<br>RF__min_samples_leaf : 11; RF__n_estimators : 705;<br>RF__random_state : 100                                   | 0.699218 | 0.75913  |
| XGB | SS | SMOTE  | XGB__colsample_bytree : 1.0; XGB__gamma :<br>5.128228593675832; XGB__max_depth : 1;<br>XGB__min_child_weight : 5.871496692006498;<br>XGB__random_state : 0; XGB__scale_pos_weight : 5.0;<br>XGB__subsample : 0.9 | 0.699044 | 0.761583 |
| RF  | SS | ROS    | RF__class_weight : None; RF__criterion : gini;<br>RF__max_depth : 4; RF__max_features : 1;<br>RF__min_samples_leaf : 5; RF__n_estimators : 361;<br>RF__random_state : 88                                         | 0.698901 | 0.816177 |
| XGB | SS | ADASYN | XGB__colsample_bytree : 0.1; XGB__gamma :<br>2.631648171634598; XGB__max_depth : 1;<br>XGB__min_child_weight : 0.0; XGB__random_state :<br>0; XGB__scale_pos_weight : 0.5; XGB__subsample :<br>0.5               | 0.698784 | 0.753103 |
| RF  | SS | SMOTE  | RF__class_weight : balanced_subsample;<br>RF__criterion : log_loss; RF__max_depth : 3;<br>RF__max_features : 1; RF__min_samples_leaf : 1;<br>RF__n_estimators : 898; RF__random_state : 97                       | 0.698764 | 0.788998 |



|     |          |          |                                                                                                                                                                                                                    |          |          |
|-----|----------|----------|--------------------------------------------------------------------------------------------------------------------------------------------------------------------------------------------------------------------|----------|----------|
| RF  | SS       | ROS      | RF__class_weight : balanced_subsample;<br>RF__criterion : gini; RF__max_depth : 5;<br>RF__max_features : 1; RF__min_samples_leaf : 3;<br>RF__n_estimators : 332; RF__random_state : 100                            | 0.698693 | 0.851723 |
| XGB | Not used | Not used | XGB__colsample_bytree : 1.0; XGB__gamma :<br>12.522484455388685; XGB__max_depth : 2;<br>XGB__min_child_weight : 0.0; XGB__random_state :<br>0; XGB__scale_pos_weight : 3.7022442003311538;<br>XGB__subsample : 0.9 | 0.698424 | 0.777833 |
| RF  | SS       | ROS      | RF__class_weight : balanced; RF__criterion : gini;<br>RF__max_depth : 4; RF__max_features : 1;<br>RF__min_samples_leaf : 1; RF__n_estimators : 300;<br>RF__random_state : 100                                      | 0.698214 | 0.835166 |
| RF  | SS       | SMOTE    | RF__class_weight : None; RF__criterion : log_loss;<br>RF__max_depth : 4; RF__max_features : 1;<br>RF__min_samples_leaf : 3; RF__n_estimators : 708;<br>RF__random_state : 98                                       | 0.698193 | 0.813255 |
| RF  | SS       | ROS      | RF__class_weight : balanced; RF__criterion : log_loss;<br>RF__max_depth : 2; RF__max_features : 1;<br>RF__min_samples_leaf : 8; RF__n_estimators : 581;<br>RF__random_state : 100                                  | 0.698149 | 0.762047 |
| XGB | SS       | SMOTE    | XGB__colsample_bytree : 1.0; XGB__gamma :<br>4.302195515165045; XGB__max_depth : 1;<br>XGB__min_child_weight : 8.371699143821461;<br>XGB__random_state : 0; XGB__scale_pos_weight : 5.0;<br>XGB__subsample : 0.9   | 0.69805  | 0.759473 |
| RF  | MM       | ROS      | RF__class_weight : balanced; RF__criterion : gini;<br>RF__max_depth : 2; RF__max_features : 1;<br>RF__min_samples_leaf : 2; RF__n_estimators : 574;<br>RF__random_state : 41                                       | 0.698045 | 0.765719 |

|     |    |        |                                                                                                                                                                                                                                                    |          |          |
|-----|----|--------|----------------------------------------------------------------------------------------------------------------------------------------------------------------------------------------------------------------------------------------------------|----------|----------|
| RF  | SS | ROS    | RF__class_weight : None; RF__criterion : gini;<br>RF__max_depth : 5; RF__max_features : 1;<br>RF__min_samples_leaf : 1; RF__n_estimators : 546;<br>RF__random_state : 100                                                                          | 0.697955 | 0.879275 |
| XGB | MM | SMOTE  | XGB__colsample_bytree : 0.6747884605318322;<br>XGB__gamma : 6.977039154012745;<br>XGB__max_depth : 1; XGB__min_child_weight : 0.0;<br>XGB__random_state : 0; XGB__scale_pos_weight :<br>3.9410278120128917; XGB__subsample :<br>0.8408644785816788 | 0.697857 | 0.757732 |
| RF  | MM | ROS    | RF__class_weight : None; RF__criterion : gini;<br>RF__max_depth : 4; RF__max_features : 1;<br>RF__min_samples_leaf : 5; RF__n_estimators : 300;<br>RF__random_state : 100                                                                          | 0.697817 | 0.814001 |
| XGB | MM | SMOTE  | XGB__colsample_bytree : 0.630740395791118;<br>XGB__gamma : 6.006071201245516;<br>XGB__max_depth : 1; XGB__min_child_weight : 0.0;<br>XGB__random_state : 0; XGB__scale_pos_weight :<br>3.9981378323146455; XGB__subsample : 0.9                    | 0.69774  | 0.762282 |
| RF  | SS | ROS    | RF__class_weight : balanced; RF__criterion : gini;<br>RF__max_depth : 4; RF__max_features : 1;<br>RF__min_samples_leaf : 2; RF__n_estimators : 536;<br>RF__random_state : 100                                                                      | 0.69768  | 0.830106 |
| NN  | SS | SMOTE  | NN__activation : logistic; NN__alpha :<br>0.007306211783268143; NN__hidden_layer_sizes : 30;<br>NN__max_iter : 50; NN__random_state : 0;<br>NN__solver : adam                                                                                      | 0.697553 | 0.69465  |
| XGB | SS | ADASYN | XGB__colsample_bytree : 0.1; XGB__gamma : 0.01;<br>XGB__max_depth : 1; XGB__min_child_weight : 0.0;<br>XGB__random_state : 0; XGB__scale_pos_weight :<br>2.4862644924154425; XGB__subsample : 0.9                                                  | 0.697392 | 0.777013 |

|     |    |       |                                                                                                                                                                                                                                                   |          |          |
|-----|----|-------|---------------------------------------------------------------------------------------------------------------------------------------------------------------------------------------------------------------------------------------------------|----------|----------|
| RF  | MM | ROS   | RF__class_weight : balanced; RF__criterion : gini;<br>RF__max_depth : 3; RF__max_features : 1;<br>RF__min_samples_leaf : 2; RF__n_estimators : 300;<br>RF__random_state : 0                                                                       | 0.697371 | 0.796431 |
| XGB | SS | SMOTE | XGB__colsample_bytree : 0.9520694817560885;<br>XGB__gamma : 4.731161553420115;<br>XGB__max_depth : 1; XGB__min_child_weight :<br>7.880539662378007; XGB__random_state : 0;<br>XGB__scale_pos_weight : 3.4185982274891034;<br>XGB__subsample : 0.9 | 0.697336 | 0.75301  |
| NN  | SS | ROS   | NN__activation : logistic; NN__alpha : 0.0001;<br>NN__hidden_layer_sizes : 3; NN__max_iter : 455;<br>NN__random_state : 0; NN__solver : adam                                                                                                      | 0.697306 | 0.697452 |
| RF  | MM | ROS   | RF__class_weight : balanced; RF__criterion : gini;<br>RF__max_depth : 4; RF__max_features : 1;<br>RF__min_samples_leaf : 6; RF__n_estimators : 1000;<br>RF__random_state : 72                                                                     | 0.697301 | 0.810728 |
| RF  | SS | ROS   | RF__class_weight : balanced; RF__criterion : gini;<br>RF__max_depth : 2; RF__max_features : 1;<br>RF__min_samples_leaf : 3; RF__n_estimators : 300;<br>RF__random_state : 100                                                                     | 0.697286 | 0.764093 |
| RF  | SS | SMOTE | RF__class_weight : balanced_subsample;<br>RF__criterion : gini; RF__max_depth : 1;<br>RF__max_features : 1; RF__min_samples_leaf : 5;<br>RF__n_estimators : 455; RF__random_state : 100                                                           | 0.697177 | 0.733618 |
| RF  | MM | ROS   | RF__class_weight : balanced; RF__criterion : gini;<br>RF__max_depth : 4; RF__max_features : 1;<br>RF__min_samples_leaf : 4; RF__n_estimators : 398;<br>RF__random_state : 94                                                                      | 0.697175 | 0.818449 |
| RF  | MM | ROS   | RF__class_weight : None; RF__criterion : log_loss;<br>RF__max_depth : 5; RF__max_features : 1;                                                                                                                                                    | 0.697129 | 0.827762 |

|     |    |        |                                                                                                                                                                                                                                                   |          |          |
|-----|----|--------|---------------------------------------------------------------------------------------------------------------------------------------------------------------------------------------------------------------------------------------------------|----------|----------|
|     |    |        | RF__min_samples_leaf : 6; RF__n_estimators : 311;<br>RF__random_state : 62                                                                                                                                                                        |          |          |
| XGB | SS | SMOTE  | XGB__colsample_bytree : 0.1; XGB__gamma :<br>4.164451665860661; XGB__max_depth : 1;<br>XGB__min_child_weight : 8.996899106010986;<br>XGB__random_state : 0; XGB__scale_pos_weight : 5.0;<br>XGB__subsample : 0.9                                  | 0.697093 | 0.75016  |
| RF  | MM | ROS    | RF__class_weight : None; RF__criterion : gini;<br>RF__max_depth : 4; RF__max_features : 1;<br>RF__min_samples_leaf : 5; RF__n_estimators : 1000;<br>RF__random_state : 0                                                                          | 0.696955 | 0.814484 |
| NN  | SS | ADASYN | NN__activation : tanh; NN__alpha :<br>0.004562925820006588; NN__hidden_layer_sizes : 5;<br>NN__max_iter : 500; NN__random_state : 0;<br>NN__solver : adam                                                                                         | 0.696909 | 0.701705 |
| RF  | MM | ROS    | RF__class_weight : None; RF__criterion : log_loss;<br>RF__max_depth : 4; RF__max_features : 1;<br>RF__min_samples_leaf : 3; RF__n_estimators : 875;<br>RF__random_state : 55                                                                      | 0.696906 | 0.823291 |
| RF  | SS | SMOTE  | RF__class_weight : None; RF__criterion : log_loss;<br>RF__max_depth : 2; RF__max_features : 3;<br>RF__min_samples_leaf : 1; RF__n_estimators : 984;<br>RF__random_state : 4                                                                       | 0.696837 | 0.751912 |
| XGB | MM | SMOTE  | XGB__colsample_bytree : 0.7029459141756554;<br>XGB__gamma : 7.604446730553565;<br>XGB__max_depth : 1; XGB__min_child_weight : 0.0;<br>XGB__random_state : 0; XGB__scale_pos_weight :<br>3.990282070957032; XGB__subsample :<br>0.8357335463942575 | 0.696805 | 0.754824 |
| RF  | SS | ROS    | RF__class_weight : balanced; RF__criterion : gini;<br>RF__max_depth : 5; RF__max_features : 1;                                                                                                                                                    | 0.696783 | 0.83496  |

|     |    |       |                                                                                                                                                                                                                                                    |          |          |
|-----|----|-------|----------------------------------------------------------------------------------------------------------------------------------------------------------------------------------------------------------------------------------------------------|----------|----------|
|     |    |       | RF__min_samples_leaf : 5; RF__n_estimators : 803;<br>RF__random_state : 49                                                                                                                                                                         |          |          |
| RF  | SS | SMOTE | RF__class_weight : balanced_subsample;<br>RF__criterion : log_loss; RF__max_depth : 3;<br>RF__max_features : 1; RF__min_samples_leaf : 5;<br>RF__n_estimators : 336; RF__random_state : 99                                                         | 0.696732 | 0.781132 |
| RF  | MM | ROS   | RF__class_weight : balanced; RF__criterion : gini;<br>RF__max_depth : 5; RF__max_features : 1;<br>RF__min_samples_leaf : 5; RF__n_estimators : 887;<br>RF__random_state : 82                                                                       | 0.696697 | 0.834033 |
| RF  | SS | ROS   | RF__class_weight : balanced; RF__criterion : gini;<br>RF__max_depth : 5; RF__max_features : 1;<br>RF__min_samples_leaf : 4; RF__n_estimators : 822;<br>RF__random_state : 100                                                                      | 0.696665 | 0.842927 |
| RF  | MM | ROS   | RF__class_weight : None; RF__criterion : gini;<br>RF__max_depth : 4; RF__max_features : 1;<br>RF__min_samples_leaf : 1; RF__n_estimators : 985;<br>RF__random_state : 95                                                                           | 0.696663 | 0.836398 |
| XGB | MM | ROS   | XGB__colsample_bytree : 1.0; XGB__gamma :<br>12.983876280799059; XGB__max_depth : 1;<br>XGB__min_child_weight : 6.613493800394396;<br>XGB__random_state : 0; XGB__scale_pos_weight :<br>4.2934687732688985; XGB__subsample :<br>0.7672320783527744 | 0.696504 | 0.739695 |
| RF  | SS | ROS   | RF__class_weight : None; RF__criterion : gini;<br>RF__max_depth : 5; RF__max_features : 1;<br>RF__min_samples_leaf : 1; RF__n_estimators : 400;<br>RF__random_state : 100                                                                          | 0.696371 | 0.879646 |
| RF  | MM | ROS   | RF__class_weight : None; RF__criterion : gini;<br>RF__max_depth : 3; RF__max_features : 1;                                                                                                                                                         | 0.696251 | 0.795744 |

|    |    |       |                                                                                                                                                                                           |          |          |
|----|----|-------|-------------------------------------------------------------------------------------------------------------------------------------------------------------------------------------------|----------|----------|
|    |    |       | RF__min_samples_leaf : 1; RF__n_estimators : 331;<br>RF__random_state : 96                                                                                                                |          |          |
| RF | SS | ROS   | RF__class_weight : balanced; RF__criterion : log_loss;<br>RF__max_depth : 3; RF__max_features : 1;<br>RF__min_samples_leaf : 3; RF__n_estimators : 1000;<br>RF__random_state : 100        | 0.696235 | 0.794066 |
| RF | SS | ROS   | RF__class_weight : balanced; RF__criterion : log_loss;<br>RF__max_depth : 2; RF__max_features : 6;<br>RF__min_samples_leaf : 1; RF__n_estimators : 1000;<br>RF__random_state : 100        | 0.696233 | 0.767553 |
| RF | SS | ROS   | RF__class_weight : balanced; RF__criterion : log_loss;<br>RF__max_depth : 3; RF__max_features : 1;<br>RF__min_samples_leaf : 1; RF__n_estimators : 1000;<br>RF__random_state : 100        | 0.696166 | 0.7978   |
| RF | MM | ROS   | RF__class_weight : None; RF__criterion : gini;<br>RF__max_depth : 4; RF__max_features : 1;<br>RF__min_samples_leaf : 5; RF__n_estimators : 1000;<br>RF__random_state : 79                 | 0.696165 | 0.81422  |
| RF | MM | ROS   | RF__class_weight : None; RF__criterion : gini;<br>RF__max_depth : 4; RF__max_features : 1;<br>RF__min_samples_leaf : 6; RF__n_estimators : 300;<br>RF__random_state : 0                   | 0.696112 | 0.809856 |
| RF | SS | ROS   | RF__class_weight : balanced_subsample;<br>RF__criterion : log_loss; RF__max_depth : 5;<br>RF__max_features : 1; RF__min_samples_leaf : 3;<br>RF__n_estimators : 632; RF__random_state : 0 | 0.696078 | 0.851923 |
| RF | SS | SMOTE | RF__class_weight : None; RF__criterion : log_loss;<br>RF__max_depth : 3; RF__max_features : 4;<br>RF__min_samples_leaf : 2; RF__n_estimators : 991;<br>RF__random_state : 14              | 0.696061 | 0.79166  |

|     |          |          |                                                                                                                                                                                                                      |          |          |
|-----|----------|----------|----------------------------------------------------------------------------------------------------------------------------------------------------------------------------------------------------------------------|----------|----------|
| NN  | SS       | ROS      | NN__activation : logistic; NN__alpha : 0.43513970791520495; NN__hidden_layer_sizes : 40; NN__max_iter : 192; NN__random_state : 0; NN__solver : adam                                                                 | 0.696048 | 0.701765 |
| XGB | Not used | Not used | XGB__colsample_bytree : 1.0; XGB__gamma : 13.047166214482912; XGB__max_depth : 1; XGB__min_child_weight : 0.0; XGB__random_state : 0; XGB__scale_pos_weight : 3.159704766400389; XGB__subsample : 0.6305878164966068 | 0.695992 | 0.738306 |
| XGB | SS       | SMOTE    | XGB__colsample_bytree : 0.5739866723148325; XGB__gamma : 3.679309787330441; XGB__max_depth : 1; XGB__min_child_weight : 7.933127779169759; XGB__random_state : 0; XGB__scale_pos_weight : 5.0; XGB__subsample : 0.9  | 0.695985 | 0.76025  |
| XGB | SS       | ROS      | XGB__colsample_bytree : 0.1; XGB__gamma : 0.01; XGB__max_depth : 1; XGB__min_child_weight : 0.0; XGB__random_state : 0; XGB__scale_pos_weight : 2.760551823960115; XGB__subsample : 0.5                              | 0.695968 | 0.779879 |
| XGB | SS       | SMOTE    | XGB__colsample_bytree : 1.0; XGB__gamma : 3.8635825153568053; XGB__max_depth : 1; XGB__min_child_weight : 6.047204046742893; XGB__random_state : 0; XGB__scale_pos_weight : 3.5030253516598058; XGB__subsample : 0.9 | 0.695928 | 0.765597 |
| RF  | SS       | ROS      | RF__class_weight : balanced_subsample; RF__criterion : log_loss; RF__max_depth : 2; RF__max_features : 6; RF__min_samples_leaf : 2; RF__n_estimators : 300; RF__random_state : 100                                   | 0.695846 | 0.766436 |
| XGB | Not used | Not used | XGB__colsample_bytree : 1.0; XGB__gamma : 7.901615368030613; XGB__max_depth : 1; XGB__min_child_weight : 0.0; XGB__random_state :                                                                                    | 0.695793 | 0.755961 |

|     |    |       |                                                                                                                                                                                                                                 |          |          |
|-----|----|-------|---------------------------------------------------------------------------------------------------------------------------------------------------------------------------------------------------------------------------------|----------|----------|
|     |    |       | 0; XGB__scale_pos_weight : 3.9680884627856092;<br>XGB__subsample : 0.9                                                                                                                                                          |          |          |
| RF  | SS | ROS   | RF__class_weight : None; RF__criterion : log_loss;<br>RF__max_depth : 2; RF__max_features : 1;<br>RF__min_samples_leaf : 1; RF__n_estimators : 321;<br>RF__random_state : 100                                                   | 0.69572  | 0.765099 |
| RF  | SS | ROS   | RF__class_weight : balanced; RF__criterion : log_loss;<br>RF__max_depth : 5; RF__max_features : 1;<br>RF__min_samples_leaf : 2; RF__n_estimators : 443;<br>RF__random_state : 100                                               | 0.695714 | 0.863717 |
| XGB | MM | SMOTE | XGB__colsample_bytree : 0.6504103845092375;<br>XGB__gamma : 5.976130305505102;<br>XGB__max_depth : 1; XGB__min_child_weight : 0.0;<br>XGB__random_state : 0; XGB__scale_pos_weight :<br>3.915482202159969; XGB__subsample : 0.9 | 0.695673 | 0.761826 |
| RF  | SS | ROS   | RF__class_weight : balanced; RF__criterion : log_loss;<br>RF__max_depth : 5; RF__max_features : 1;<br>RF__min_samples_leaf : 1; RF__n_estimators : 1000;<br>RF__random_state : 100                                              | 0.695596 | 0.877031 |
| RF  | SS | SMOTE | RF__class_weight : None; RF__criterion : log_loss;<br>RF__max_depth : 2; RF__max_features : 1;<br>RF__min_samples_leaf : 2; RF__n_estimators : 927;<br>RF__random_state : 51                                                    | 0.695563 | 0.758526 |
| XGB | SS | SMOTE | XGB__colsample_bytree : 1.0; XGB__gamma :<br>6.10047413137733; XGB__max_depth : 1;<br>XGB__min_child_weight : 0.0; XGB__random_state :<br>0; XGB__scale_pos_weight : 3.687553488454467;<br>XGB__subsample : 0.9                 | 0.695558 | 0.76123  |
| RF  | MM | ROS   | RF__class_weight : balanced_subsample;<br>RF__criterion : gini; RF__max_depth : 3;                                                                                                                                              | 0.695441 | 0.787449 |



|     |    |       |                                                                                                                                                                                                                                                   |          |          |
|-----|----|-------|---------------------------------------------------------------------------------------------------------------------------------------------------------------------------------------------------------------------------------------------------|----------|----------|
|     |    |       | RF__max_features : 1; RF__min_samples_leaf : 6;<br>RF__n_estimators : 1000; RF__random_state : 0                                                                                                                                                  |          |          |
| RF  | SS | ROS   | RF__class_weight : balanced; RF__criterion : log_loss;<br>RF__max_depth : 1; RF__max_features : 1;<br>RF__min_samples_leaf : 5; RF__n_estimators : 300;<br>RF__random_state : 90                                                                  | 0.695317 | 0.737899 |
| XGB | SS | SMOTE | XGB__colsample_bytree : 1.0; XGB__gamma :<br>10.134857613880865; XGB__max_depth : 1;<br>XGB__min_child_weight : 0.0; XGB__random_state :<br>0; XGB__scale_pos_weight : 4.067226597671307;<br>XGB__subsample : 0.9                                 | 0.695216 | 0.742971 |
| XGB | SS | SMOTE | XGB__colsample_bytree : 1.0; XGB__gamma :<br>5.131335783616919; XGB__max_depth : 1;<br>XGB__min_child_weight : 6.199819563667402;<br>XGB__random_state : 0; XGB__scale_pos_weight : 5.0;<br>XGB__subsample : 0.9                                  | 0.695187 | 0.761365 |
| RF  | SS | ROS   | RF__class_weight : balanced; RF__criterion : gini;<br>RF__max_depth : 1; RF__max_features : 1;<br>RF__min_samples_leaf : 14; RF__n_estimators : 308;<br>RF__random_state : 100                                                                    | 0.695147 | 0.734235 |
| XGB | MM | SMOTE | XGB__colsample_bytree : 0.5757431420985275;<br>XGB__gamma : 5.950034688430638;<br>XGB__max_depth : 1; XGB__min_child_weight : 0.0;<br>XGB__random_state : 0; XGB__scale_pos_weight :<br>3.978507500949876; XGB__subsample :<br>0.8377619703535413 | 0.695141 | 0.761319 |
| RF  | MM | ROS   | RF__class_weight : balanced_subsample;<br>RF__criterion : gini; RF__max_depth : 2;<br>RF__max_features : 7; RF__min_samples_leaf : 2;<br>RF__n_estimators : 789; RF__random_state : 100                                                           | 0.69513  | 0.767552 |

|     |    |       |                                                                                                                                                                                                                                                    |          |          |
|-----|----|-------|----------------------------------------------------------------------------------------------------------------------------------------------------------------------------------------------------------------------------------------------------|----------|----------|
| RF  | SS | ROS   | RF__class_weight : None; RF__criterion : log_loss;<br>RF__max_depth : 2; RF__max_features : 1;<br>RF__min_samples_leaf : 4; RF__n_estimators : 849;<br>RF__random_state : 100                                                                      | 0.6951   | 0.765936 |
| XGB | MM | SMOTE | XGB__colsample_bytree : 0.6336730229580582;<br>XGB__gamma : 5.773927742955594;<br>XGB__max_depth : 1; XGB__min_child_weight : 0.0;<br>XGB__random_state : 0; XGB__scale_pos_weight :<br>3.909451949160928; XGB__subsample : 0.9                    | 0.69505  | 0.763197 |
| XGB | SS | ROS   | XGB__colsample_bytree : 0.1; XGB__gamma : 0.01;<br>XGB__max_depth : 1; XGB__min_child_weight : 0.0;<br>XGB__random_state : 0; XGB__scale_pos_weight :<br>2.054272846361842; XGB__subsample : 0.5                                                   | 0.694987 | 0.78078  |
| RF  | SS | ROS   | RF__class_weight : balanced; RF__criterion : log_loss;<br>RF__max_depth : 1; RF__max_features : 1;<br>RF__min_samples_leaf : 10; RF__n_estimators : 309;<br>RF__random_state : 100                                                                 | 0.694958 | 0.73476  |
| NN  | SS | ROS   | NN__activation : tanh; NN__alpha :<br>2.6096146808538574; NN__hidden_layer_sizes : 8;<br>NN__max_iter : 478; NN__random_state : 0;<br>NN__solver : adam                                                                                            | 0.694927 | 0.709437 |
| RF  | SS | SMOTE | RF__class_weight : balanced; RF__criterion : gini;<br>RF__max_depth : 3; RF__max_features : 1;<br>RF__min_samples_leaf : 1; RF__n_estimators : 300;<br>RF__random_state : 0                                                                        | 0.694907 | 0.789781 |
| XGB | MM | ROS   | XGB__colsample_bytree : 1.0; XGB__gamma :<br>13.967662174349467; XGB__max_depth : 1;<br>XGB__min_child_weight : 10.854940935747983;<br>XGB__random_state : 0; XGB__scale_pos_weight :<br>4.957277013256746; XGB__subsample :<br>0.7470605098509118 | 0.694751 | 0.735803 |

|     |          |          |                                                                                                                                                                                                                  |          |          |
|-----|----------|----------|------------------------------------------------------------------------------------------------------------------------------------------------------------------------------------------------------------------|----------|----------|
| RF  | SS       | ROS      | RF__class_weight : None; RF__criterion : gini;<br>RF__max_depth : 5; RF__max_features : 1;<br>RF__min_samples_leaf : 1; RF__n_estimators : 620;<br>RF__random_state : 73                                         | 0.694733 | 0.879299 |
| RF  | SS       | ROS      | RF__class_weight : balanced; RF__criterion : log_loss;<br>RF__max_depth : 5; RF__max_features : 1;<br>RF__min_samples_leaf : 3; RF__n_estimators : 300;<br>RF__random_state : 100                                | 0.694717 | 0.852378 |
| RF  | SS       | ROS      | RF__class_weight : None; RF__criterion : gini;<br>RF__max_depth : 5; RF__max_features : 1;<br>RF__min_samples_leaf : 6; RF__n_estimators : 456;<br>RF__random_state : 2                                          | 0.694699 | 0.826845 |
| RF  | SS       | ROS      | RF__class_weight : balanced; RF__criterion : log_loss;<br>RF__max_depth : 1; RF__max_features : 1;<br>RF__min_samples_leaf : 2; RF__n_estimators : 300;<br>RF__random_state : 100                                | 0.694613 | 0.734183 |
| XGB | SS       | ROS      | XGB__colsample_bytree : 0.1; XGB__gamma : 0.01;<br>XGB__max_depth : 1; XGB__min_child_weight : 0.0;<br>XGB__random_state : 0; XGB__scale_pos_weight :<br>2.0744553052420187; XGB__subsample : 0.5                | 0.694608 | 0.780848 |
| XGB | Not used | Not used | XGB__colsample_bytree : 1.0; XGB__gamma :<br>8.952798715710603; XGB__max_depth : 1;<br>XGB__min_child_weight : 0.0; XGB__random_state :<br>0; XGB__scale_pos_weight : 4.002287695828253;<br>XGB__subsample : 0.9 | 0.694604 | 0.753177 |
| XGB | Not used | Not used | XGB__colsample_bytree : 1.0; XGB__gamma :<br>9.05955711809137; XGB__max_depth : 1;<br>XGB__min_child_weight : 0.0; XGB__random_state :<br>0; XGB__scale_pos_weight : 4.053478835955055;<br>XGB__subsample : 0.9  | 0.694585 | 0.753032 |

|     |    |        |                                                                                                                                                                                                                   |          |          |
|-----|----|--------|-------------------------------------------------------------------------------------------------------------------------------------------------------------------------------------------------------------------|----------|----------|
| RF  | MM | ROS    | RF__class_weight : balanced_subsample;<br>RF__criterion : log_loss; RF__max_depth : 1;<br>RF__max_features : 1; RF__min_samples_leaf : 20;<br>RF__n_estimators : 481; RF__random_state : 100                      | 0.694547 | 0.733328 |
| RF  | MM | ROS    | RF__class_weight : balanced_subsample;<br>RF__criterion : log_loss; RF__max_depth : 2;<br>RF__max_features : 1; RF__min_samples_leaf : 3;<br>RF__n_estimators : 596; RF__random_state : 99                        | 0.69453  | 0.763649 |
| XGB | SS | ADASYN | XGB__colsample_bytree : 0.1; XGB__gamma :<br>4.061834030884504; XGB__max_depth : 1;<br>XGB__min_child_weight : 0.0; XGB__random_state :<br>0; XGB__scale_pos_weight : 3.3414294102558997;<br>XGB__subsample : 0.9 | 0.694389 | 0.766401 |
| NN  | SS | ADASYN | NN__activation : tanh; NN__alpha :<br>0.0014850323682057333; NN__hidden_layer_sizes : 20;<br>NN__max_iter : 50; NN__random_state : 0;<br>NN__solver : adam                                                        | 0.694382 | 0.702941 |
| XGB | SS | SMOTE  | XGB__colsample_bytree : 1.0; XGB__gamma :<br>3.7499656581046463; XGB__max_depth : 1;<br>XGB__min_child_weight : 7.73628773092814;<br>XGB__random_state : 0; XGB__scale_pos_weight : 5.0;<br>XGB__subsample : 0.9  | 0.694341 | 0.763244 |
| RF  | SS | ROS    | RF__class_weight : None; RF__criterion : gini;<br>RF__max_depth : 3; RF__max_features : 1;<br>RF__min_samples_leaf : 10; RF__n_estimators : 614;<br>RF__random_state : 100                                        | 0.694339 | 0.779725 |
| RF  | SS | ROS    | RF__class_weight : balanced; RF__criterion : log_loss;<br>RF__max_depth : 5; RF__max_features : 2;<br>RF__min_samples_leaf : 1; RF__n_estimators : 336;<br>RF__random_state : 100                                 | 0.694218 | 0.880265 |

|     |    |        |                                                                                                                                                                                                                                                   |          |          |
|-----|----|--------|---------------------------------------------------------------------------------------------------------------------------------------------------------------------------------------------------------------------------------------------------|----------|----------|
| XGB | SS | ROS    | XGB__colsample_bytree : 0.1; XGB__gamma : 0.01;<br>XGB__max_depth : 1; XGB__min_child_weight : 0.0;<br>XGB__random_state : 0; XGB__scale_pos_weight :<br>1.7841648265068442; XGB__subsample : 0.5                                                 | 0.694177 | 0.78034  |
| XGB | MM | SMOTE  | XGB__colsample_bytree : 0.7024895240402017;<br>XGB__gamma : 7.474466176373593;<br>XGB__max_depth : 1; XGB__min_child_weight : 0.0;<br>XGB__random_state : 0; XGB__scale_pos_weight :<br>3.995593708708675; XGB__subsample :<br>0.8346605838640351 | 0.694153 | 0.754659 |
| RF  | SS | SMOTE  | RF__class_weight : None; RF__criterion : log_loss;<br>RF__max_depth : 2; RF__max_features : 1;<br>RF__min_samples_leaf : 7; RF__n_estimators : 318;<br>RF__random_state : 99                                                                      | 0.694131 | 0.755936 |
| XGB | SS | ADASYN | XGB__colsample_bytree : 0.1; XGB__gamma : 0.01;<br>XGB__max_depth : 1; XGB__min_child_weight : 0.0;<br>XGB__random_state : 0; XGB__scale_pos_weight :<br>3.0546364663464303; XGB__subsample : 0.9                                                 | 0.694112 | 0.776887 |
| RF  | SS | SMOTE  | RF__class_weight : balanced; RF__criterion : gini;<br>RF__max_depth : 2; RF__max_features : 2;<br>RF__min_samples_leaf : 3; RF__n_estimators : 1000;<br>RF__random_state : 30                                                                     | 0.694046 | 0.755992 |
| NN  | SS | ROS    | NN__activation : tanh; NN__alpha :<br>0.3184983766348907; NN__hidden_layer_sizes : 35;<br>NN__max_iter : 237; NN__random_state : 0;<br>NN__solver : adam                                                                                          | 0.694046 | 0.723394 |
| RF  | MM | ROS    | RF__class_weight : balanced; RF__criterion : log_loss;<br>RF__max_depth : 3; RF__max_features : 1;<br>RF__min_samples_leaf : 1; RF__n_estimators : 867;<br>RF__random_state : 64                                                                  | 0.693997 | 0.797754 |

|     |          |          |                                                                                                                                                                                                                                                   |          |          |
|-----|----------|----------|---------------------------------------------------------------------------------------------------------------------------------------------------------------------------------------------------------------------------------------------------|----------|----------|
| NN  | SS       | ROS      | NN__activation : identity; NN__alpha : 10.0;<br>NN__hidden_layer_sizes : 15; NN__max_iter : 500;<br>NN__random_state : 0; NN__solver : adam                                                                                                       | 0.693962 | 0.702487 |
| RF  | MM       | ROS      | RF__class_weight : balanced; RF__criterion : gini;<br>RF__max_depth : 4; RF__max_features : 1;<br>RF__min_samples_leaf : 2; RF__n_estimators : 776;<br>RF__random_state : 0                                                                       | 0.693961 | 0.829423 |
| RF  | MM       | ROS      | RF__class_weight : balanced; RF__criterion : gini;<br>RF__max_depth : 2; RF__max_features : 5;<br>RF__min_samples_leaf : 1; RF__n_estimators : 361;<br>RF__random_state : 61                                                                      | 0.693883 | 0.769026 |
| XGB | MM       | SMOTE    | XGB__colsample_bytree : 0.7984402541532296;<br>XGB__gamma : 7.360158568012926;<br>XGB__max_depth : 1; XGB__min_child_weight : 0.0;<br>XGB__random_state : 0; XGB__scale_pos_weight :<br>4.080490693638323; XGB__subsample :<br>0.8525057658872475 | 0.693845 | 0.755605 |
| NN  | SS       | SMOTE    | NN__activation : tanh; NN__alpha :<br>0.14833592925889552; NN__hidden_layer_sizes : 3;<br>NN__max_iter : 500; NN__random_state : 0;<br>NN__solver : adam                                                                                          | 0.693639 | 0.720996 |
| NN  | SS       | ROS      | NN__activation : logistic; NN__alpha : 10.0;<br>NN__hidden_layer_sizes : 50; NN__max_iter : 496;<br>NN__random_state : 0; NN__solver : lbfgs                                                                                                      | 0.693636 | 0.70179  |
| RF  | MM       | ROS      | RF__class_weight : None; RF__criterion : gini;<br>RF__max_depth : 2; RF__max_features : 6;<br>RF__min_samples_leaf : 2; RF__n_estimators : 338;<br>RF__random_state : 5                                                                           | 0.693557 | 0.769197 |
| XGB | Not used | Not used | XGB__colsample_bytree : 0.5238431776133157;<br>XGB__gamma : 3.792195455030537;<br>XGB__max_depth : 2; XGB__min_child_weight : 0.0;                                                                                                                | 0.693451 | 0.828518 |

|     |    |        |                                                                                                                                                                                                                                             |          |          |
|-----|----|--------|---------------------------------------------------------------------------------------------------------------------------------------------------------------------------------------------------------------------------------------------|----------|----------|
|     |    |        | XGB__random_state : 0; XGB__scale_pos_weight : 3.6232357072738735; XGB__subsample : 0.9                                                                                                                                                     |          |          |
| XGB | MM | SMOTE  | XGB__colsample_bytree : 0.590382816088513;<br>XGB__gamma : 4.834587218228065;<br>XGB__max_depth : 1; XGB__min_child_weight : 0.0;<br>XGB__random_state : 0; XGB__scale_pos_weight : 3.7581709378652435; XGB__subsample : 0.9                | 0.693324 | 0.766447 |
| XGB | MM | ADASYN | XGB__colsample_bytree : 1.0; XGB__gamma : 5.249346010787132; XGB__max_depth : 1;<br>XGB__min_child_weight : 0.0; XGB__random_state : 0; XGB__scale_pos_weight : 0.5; XGB__subsample : 0.6674005885827915                                    | 0.693301 | 0.742103 |
| XGB | SS | ROS    | XGB__colsample_bytree : 0.125993416307355;<br>XGB__gamma : 0.01; XGB__max_depth : 1;<br>XGB__min_child_weight : 5.811187786708272;<br>XGB__random_state : 0; XGB__scale_pos_weight : 2.386588510611061; XGB__subsample : 0.9                | 0.693263 | 0.778056 |
| RF  | MM | ROS    | RF__class_weight : balanced; RF__criterion : gini;<br>RF__max_depth : 5; RF__max_features : 1;<br>RF__min_samples_leaf : 2; RF__n_estimators : 552;<br>RF__random_state : 96                                                                | 0.69322  | 0.862738 |
| NN  | SS | ADASYN | NN__activation : logistic; NN__alpha : 0.0041311729337456336; NN__hidden_layer_sizes : 40;<br>NN__max_iter : 486; NN__random_state : 0;<br>NN__solver : adam                                                                                | 0.693087 | 0.703006 |
| XGB | MM | SMOTE  | XGB__colsample_bytree : 0.7294082371469425;<br>XGB__gamma : 7.992507664600049;<br>XGB__max_depth : 1; XGB__min_child_weight : 0.0;<br>XGB__random_state : 0; XGB__scale_pos_weight : 4.026275056798889; XGB__subsample : 0.8322597911320617 | 0.693038 | 0.750942 |

|     |          |          |                                                                                                                                                                                                                                                  |          |          |
|-----|----------|----------|--------------------------------------------------------------------------------------------------------------------------------------------------------------------------------------------------------------------------------------------------|----------|----------|
| XGB | MM       | SMOTE    | XGB__colsample_bytree : 0.5376547986680752;<br>XGB__gamma : 5.484601988755668;<br>XGB__max_depth : 1; XGB__min_child_weight : 0.0;<br>XGB__random_state : 0; XGB__scale_pos_weight :<br>3.784428584534968; XGB__subsample :<br>0.832856094938742 | 0.69296  | 0.764919 |
| XGB | SS       | ADASYN   | XGB__colsample_bytree : 0.1; XGB__gamma : 0.01;<br>XGB__max_depth : 1; XGB__min_child_weight : 0.0;<br>XGB__random_state : 0; XGB__scale_pos_weight :<br>1.8950650474636528; XGB__subsample : 0.9                                                | 0.692951 | 0.777582 |
| XGB | Not used | Not used | XGB__colsample_bytree : 0.9506538846584873;<br>XGB__gamma : 12.831511260940486;<br>XGB__max_depth : 1; XGB__min_child_weight : 0.0;<br>XGB__random_state : 0; XGB__scale_pos_weight : 5.0;<br>XGB__subsample : 0.7348957497769235                | 0.692951 | 0.7499   |
| XGB | SS       | ADASYN   | XGB__colsample_bytree : 1.0; XGB__gamma :<br>5.759911271557475; XGB__max_depth : 1;<br>XGB__min_child_weight : 0.0; XGB__random_state :<br>0; XGB__scale_pos_weight : 0.5; XGB__subsample :<br>0.9                                               | 0.692945 | 0.733264 |
| XGB | MM       | SMOTE    | XGB__colsample_bytree : 1.0; XGB__gamma :<br>2.9716748876704724; XGB__max_depth : 1;<br>XGB__min_child_weight : 0.0; XGB__random_state :<br>0; XGB__scale_pos_weight : 3.6655622002485915;<br>XGB__subsample : 0.9                               | 0.692914 | 0.776671 |
| NN  | SS       | SMOTE    | NN__activation : logistic; NN__alpha :<br>0.00021228965539871224; NN__hidden_layer_sizes :<br>27; NN__max_iter : 50; NN__random_state : 0;<br>NN__solver : adam                                                                                  | 0.692911 | 0.696633 |
| XGB | MM       | SMOTE    | XGB__colsample_bytree : 0.5292839702664169;<br>XGB__gamma : 5.389372251327775;                                                                                                                                                                   | 0.692881 | 0.765498 |



|     |    |        |                                                                                                                                                                                                                                 |          |          |
|-----|----|--------|---------------------------------------------------------------------------------------------------------------------------------------------------------------------------------------------------------------------------------|----------|----------|
|     |    |        | XGB__max_depth : 1; XGB__min_child_weight : 0.0;<br>XGB__random_state : 0; XGB__scale_pos_weight :<br>3.7862116145489155; XGB__subsample :<br>0.8325823249082597                                                                |          |          |
| NN  | SS | SMOTE  | NN__activation : tanh; NN__alpha :<br>0.07125080367906376; NN__hidden_layer_sizes : 3;<br>NN__max_iter : 500; NN__random_state : 0;<br>NN__solver : adam                                                                        | 0.692864 | 0.721826 |
| NN  | SS | ROS    | NN__activation : tanh; NN__alpha : 10.0;<br>NN__hidden_layer_sizes : 50; NN__max_iter : 50;<br>NN__random_state : 0; NN__solver : adam                                                                                          | 0.692757 | 0.704562 |
| XGB | MM | SMOTE  | XGB__colsample_bytree : 0.5866829103915807;<br>XGB__gamma : 4.49373707241089; XGB__max_depth :<br>1; XGB__min_child_weight : 0.0;<br>XGB__random_state : 0; XGB__scale_pos_weight :<br>3.6703470418497735; XGB__subsample : 0.9 | 0.692685 | 0.766804 |
| NN  | SS | ADASYN | NN__activation : logistic; NN__alpha : 0.0001;<br>NN__hidden_layer_sizes : 40; NN__max_iter : 171;<br>NN__random_state : 0; NN__solver : adam                                                                                   | 0.692673 | 0.703172 |
| RF  | SS | SMOTE  | RF__class_weight : balanced; RF__criterion : log_loss;<br>RF__max_depth : 1; RF__max_features : 2;<br>RF__min_samples_leaf : 12; RF__n_estimators : 343;<br>RF__random_state : 25                                               | 0.692364 | 0.724846 |
| XGB | SS | ADASYN | XGB__colsample_bytree : 0.1; XGB__gamma :<br>3.021437347663065; XGB__max_depth : 1;<br>XGB__min_child_weight : 0.0; XGB__random_state :<br>0; XGB__scale_pos_weight : 1.7124216154620462;<br>XGB__subsample : 0.9               | 0.692358 | 0.768877 |
| RF  | SS | SMOTE  | RF__class_weight : balanced; RF__criterion : gini;<br>RF__max_depth : 3; RF__max_features : 9;                                                                                                                                  | 0.692154 | 0.794638 |

|     |    |       |                                                                                                                                                                                                                                                    |          |          |
|-----|----|-------|----------------------------------------------------------------------------------------------------------------------------------------------------------------------------------------------------------------------------------------------------|----------|----------|
|     |    |       | RF__min_samples_leaf : 1; RF__n_estimators : 614;<br>RF__random_state : 96                                                                                                                                                                         |          |          |
| RF  | SS | SMOTE | RF__class_weight : balanced_subsample;<br>RF__criterion : log_loss; RF__max_depth : 3;<br>RF__max_features : 8; RF__min_samples_leaf : 3;<br>RF__n_estimators : 319; RF__random_state : 57                                                         | 0.692137 | 0.789923 |
| XGB | MM | SMOTE | XGB__colsample_bytree : 0.5437700723328859;<br>XGB__gamma : 5.707424877893317;<br>XGB__max_depth : 1; XGB__min_child_weight : 0.0;<br>XGB__random_state : 0; XGB__scale_pos_weight :<br>3.7621912919751628; XGB__subsample :<br>0.8270266378914082 | 0.692124 | 0.761118 |
| XGB | MM | SMOTE | XGB__colsample_bytree : 0.6966393683050776;<br>XGB__gamma : 6.457676393022992;<br>XGB__max_depth : 1; XGB__min_child_weight : 0.0;<br>XGB__random_state : 0; XGB__scale_pos_weight :<br>3.9466483912053016; XGB__subsample : 0.9                   | 0.691853 | 0.759928 |
| NN  | SS | SMOTE | NN__activation : logistic; NN__alpha :<br>0.10062227690897685; NN__hidden_layer_sizes : 50;<br>NN__max_iter : 500; NN__random_state : 0;<br>NN__solver : adam                                                                                      | 0.691572 | 0.703884 |
| NN  | SS | ROS   | NN__activation : tanh; NN__alpha : 10.0;<br>NN__hidden_layer_sizes : 3; NN__max_iter : 500;<br>NN__random_state : 0; NN__solver : adam                                                                                                             | 0.691558 | 0.701091 |
| NN  | SS | ROS   | NN__activation : identity; NN__alpha : 10.0;<br>NN__hidden_layer_sizes : 50; NN__max_iter : 54;<br>NN__random_state : 0; NN__solver : lbfgs                                                                                                        | 0.691501 | 0.702256 |
| XGB | SS | ROS   | XGB__colsample_bytree : 0.1; XGB__gamma : 0.01;<br>XGB__max_depth : 1; XGB__min_child_weight : 0.0;<br>XGB__random_state : 0; XGB__scale_pos_weight :                                                                                              | 0.691362 | 0.783744 |

|     |    |        |                                                                                                                                                                                                                    |          |          |
|-----|----|--------|--------------------------------------------------------------------------------------------------------------------------------------------------------------------------------------------------------------------|----------|----------|
|     |    |        | 1.6825471777346699; XGB__subsample :<br>0.666098393693635                                                                                                                                                          |          |          |
| XGB | SS | ROS    | XGB__colsample_bytree : 0.1; XGB__gamma : 0.01;<br>XGB__max_depth : 1; XGB__min_child_weight :<br>4.349577253151341; XGB__random_state : 0;<br>XGB__scale_pos_weight : 2.097687129430841;<br>XGB__subsample : 0.5  | 0.691097 | 0.768453 |
| XGB | SS | ADASYN | XGB__colsample_bytree : 0.1; XGB__gamma :<br>3.4516403509060947; XGB__max_depth : 1;<br>XGB__min_child_weight : 0.0; XGB__random_state :<br>0; XGB__scale_pos_weight : 1.8031768252910492;<br>XGB__subsample : 0.5 | 0.691081 | 0.760445 |
| NN  | SS | ADASYN | NN__activation : logistic; NN__alpha :<br>0.3663928960626971; NN__hidden_layer_sizes : 30;<br>NN__max_iter : 500; NN__random_state : 0;<br>NN__solver : adam                                                       | 0.691073 | 0.701667 |
| XGB | SS | ADASYN | XGB__colsample_bytree : 0.1; XGB__gamma :<br>1.3404544702071914; XGB__max_depth : 1;<br>XGB__min_child_weight : 0.0; XGB__random_state :<br>0; XGB__scale_pos_weight : 0.5; XGB__subsample :<br>0.5                | 0.691051 | 0.763946 |
| NN  | SS | SMOTE  | NN__activation : logistic; NN__alpha :<br>0.0019011746609606456; NN__hidden_layer_sizes : 50;<br>NN__max_iter : 500; NN__random_state : 0;<br>NN__solver : adam                                                    | 0.69078  | 0.703937 |
| XGB | MM | ADASYN | XGB__colsample_bytree : 1.0; XGB__gamma :<br>4.364606566317022; XGB__max_depth : 1;<br>XGB__min_child_weight : 0.0; XGB__random_state :<br>0; XGB__scale_pos_weight : 0.5; XGB__subsample :<br>0.5                 | 0.690725 | 0.758276 |

|     |          |          |                                                                                                                                                                                                                                  |          |          |
|-----|----------|----------|----------------------------------------------------------------------------------------------------------------------------------------------------------------------------------------------------------------------------------|----------|----------|
| NN  | SS       | ROS      | NN__activation : identity; NN__alpha : 0.0001;<br>NN__hidden_layer_sizes : 50; NN__max_iter : 50;<br>NN__random_state : 0; NN__solver : adam                                                                                     | 0.690709 | 0.702271 |
| RF  | SS       | SMOTE    | RF__class_weight : None; RF__criterion : gini;<br>RF__max_depth : 1; RF__max_features : 1;<br>RF__min_samples_leaf : 1; RF__n_estimators : 318;<br>RF__random_state : 85                                                         | 0.690623 | 0.732294 |
| XGB | SS       | ADASYN   | XGB__colsample_bytree : 0.1; XGB__gamma :<br>4.930722956029769; XGB__max_depth : 1;<br>XGB__min_child_weight : 0.0; XGB__random_state :<br>0; XGB__scale_pos_weight : 0.5; XGB__subsample :<br>0.5                               | 0.690613 | 0.726211 |
| XGB | SS       | ADASYN   | XGB__colsample_bytree : 0.1; XGB__gamma :<br>3.0300554993150377; XGB__max_depth : 1;<br>XGB__min_child_weight : 0.0; XGB__random_state :<br>0; XGB__scale_pos_weight : 3.474607422256215;<br>XGB__subsample : 0.9                | 0.69061  | 0.770336 |
| XGB | MM       | SMOTE    | XGB__colsample_bytree : 0.5329561500821663;<br>XGB__gamma : 6.193894008943266;<br>XGB__max_depth : 1; XGB__min_child_weight : 0.0;<br>XGB__random_state : 0; XGB__scale_pos_weight :<br>4.0172360533660765; XGB__subsample : 0.9 | 0.690484 | 0.758186 |
| XGB | Not used | Not used | XGB__colsample_bytree : 0.969105573687723;<br>XGB__gamma : 3.9229310692710517;<br>XGB__max_depth : 2; XGB__min_child_weight : 0.0;<br>XGB__random_state : 0; XGB__scale_pos_weight : 0.5;<br>XGB__subsample : 0.866403240900494  | 0.690482 | 0.764026 |
| XGB | SS       | ROS      | XGB__colsample_bytree : 0.22627644728878518;<br>XGB__gamma : 0.01; XGB__max_depth : 1;<br>XGB__min_child_weight : 0.0; XGB__random_state :                                                                                       | 0.690373 | 0.779275 |

|     |          |          |                                                                                                                                                                                                                               |          |          |
|-----|----------|----------|-------------------------------------------------------------------------------------------------------------------------------------------------------------------------------------------------------------------------------|----------|----------|
|     |          |          | 0; XGB__scale_pos_weight : 5.0; XGB__subsample : 0.5096725459468833                                                                                                                                                           |          |          |
| XGB | MM       | SMOTE    | XGB__colsample_bytree : 0.7991353418231801;<br>XGB__gamma : 6.842031677841393;<br>XGB__max_depth : 1; XGB__min_child_weight : 0.0;<br>XGB__random_state : 0; XGB__scale_pos_weight : 3.9724298487997705; XGB__subsample : 0.9 | 0.690337 | 0.758813 |
| NN  | SS       | ROS      | NN__activation : identity; NN__alpha : 0.007282087011117253; NN__hidden_layer_sizes : 50;<br>NN__max_iter : 500; NN__random_state : 0;<br>NN__solver : adam                                                                   | 0.69033  | 0.702196 |
| RF  | SS       | SMOTE    | RF__class_weight : balanced_subsample;<br>RF__criterion : log_loss; RF__max_depth : 2;<br>RF__max_features : 3; RF__min_samples_leaf : 11;<br>RF__n_estimators : 470; RF__random_state : 46                                   | 0.690312 | 0.741356 |
| XGB | Not used | Not used | XGB__colsample_bytree : 1.0; XGB__gamma : 7.91156646020262; XGB__max_depth : 3;<br>XGB__min_child_weight : 0.0; XGB__random_state : 0; XGB__scale_pos_weight : 3.291022952759355;<br>XGB__subsample : 0.8029335000309636      | 0.690308 | 0.826784 |
| RF  | SS       | SMOTE    | RF__class_weight : None; RF__criterion : gini;<br>RF__max_depth : 5; RF__max_features : 1;<br>RF__min_samples_leaf : 2; RF__n_estimators : 1000;<br>RF__random_state : 0                                                      | 0.690163 | 0.849565 |
| XGB | MM       | ADASYN   | XGB__colsample_bytree : 1.0; XGB__gamma : 11.621325063724372; XGB__max_depth : 6;<br>XGB__min_child_weight : 0.0; XGB__random_state : 0; XGB__scale_pos_weight : 2.4121603268482694;<br>XGB__subsample : 0.8815630067016531   | 0.690047 | 0.811156 |

|     |          |          |                                                                                                                                                                                                                                   |          |          |
|-----|----------|----------|-----------------------------------------------------------------------------------------------------------------------------------------------------------------------------------------------------------------------------------|----------|----------|
| NN  | SS       | ADASYN   | NN__activation : logistic; NN__alpha : 0.0001;<br>NN__hidden_layer_sizes : 3; NN__max_iter : 463;<br>NN__random_state : 0; NN__solver : adam                                                                                      | 0.690043 | 0.692972 |
| XGB | Not used | Not used | XGB__colsample_bytree : 0.1; XGB__gamma :<br>8.186133302415978; XGB__max_depth : 1;<br>XGB__min_child_weight : 0.0; XGB__random_state :<br>0; XGB__scale_pos_weight : 3.097005067296185;<br>XGB__subsample : 0.9                  | 0.690024 | 0.746615 |
| XGB | Not used | Not used | XGB__colsample_bytree : 0.8173650468662265;<br>XGB__gamma : 2.9204370293898365;<br>XGB__max_depth : 1; XGB__min_child_weight : 0.0;<br>XGB__random_state : 0; XGB__scale_pos_weight :<br>2.2160160154091493; XGB__subsample : 0.9 | 0.690023 | 0.778346 |
| XGB | SS       | ROS      | XGB__colsample_bytree : 0.1; XGB__gamma : 0.01;<br>XGB__max_depth : 1; XGB__min_child_weight :<br>13.10393335588331; XGB__random_state : 0;<br>XGB__scale_pos_weight : 2.9003621236310666;<br>XGB__subsample : 0.9                | 0.690011 | 0.752979 |
| XGB | Not used | Not used | XGB__colsample_bytree : 1.0; XGB__gamma :<br>3.9662383677555546; XGB__max_depth : 1;<br>XGB__min_child_weight : 0.0; XGB__random_state :<br>0; XGB__scale_pos_weight : 3.4031107291041716;<br>XGB__subsample : 0.9                | 0.689972 | 0.779066 |
| RF  | SS       | SMOTE    | RF__class_weight : balanced; RF__criterion : log_loss;<br>RF__max_depth : 4; RF__max_features : 8;<br>RF__min_samples_leaf : 1; RF__n_estimators : 391;<br>RF__random_state : 0                                                   | 0.689866 | 0.830763 |
| XGB | SS       | SMOTE    | XGB__colsample_bytree : 1.0; XGB__gamma :<br>5.131091349001754; XGB__max_depth : 1;<br>XGB__min_child_weight : 7.36376132291421;                                                                                                  | 0.689865 | 0.756343 |

|     |          |          |                                                                                                                                                                                                              |          |          |
|-----|----------|----------|--------------------------------------------------------------------------------------------------------------------------------------------------------------------------------------------------------------|----------|----------|
|     |          |          | XGB__random_state : 0; XGB__scale_pos_weight : 4.175844606564892; XGB__subsample : 0.5                                                                                                                       |          |          |
| NN  | Not used | Not used | NN__activation : tanh; NN__alpha : 10.0;<br>NN__hidden_layer_sizes : 3; NN__max_iter : 408;<br>NN__random_state : 0; NN__solver : lbfgs                                                                      | 0.689812 | 0.713764 |
| XGB | SS       | ADASYN   | XGB__colsample_bytree : 1.0; XGB__gamma : 7.20050984483231; XGB__max_depth : 1;<br>XGB__min_child_weight : 0.0; XGB__random_state : 0; XGB__scale_pos_weight : 2.7612210590268162;<br>XGB__subsample : 0.9   | 0.689694 | 0.754667 |
| NN  | SS       | ROS      | NN__activation : tanh; NN__alpha : 10.0;<br>NN__hidden_layer_sizes : 50; NN__max_iter : 500;<br>NN__random_state : 0; NN__solver : lbfgs                                                                     | 0.689676 | 0.70531  |
| NN  | SS       | SMOTE    | NN__activation : tanh; NN__alpha : 0.003489939724014517; NN__hidden_layer_sizes : 3;<br>NN__max_iter : 500; NN__random_state : 0;<br>NN__solver : adam                                                       | 0.68966  | 0.722528 |
| RF  | SS       | SMOTE    | RF__class_weight : None; RF__criterion : log_loss;<br>RF__max_depth : 2; RF__max_features : 9;<br>RF__min_samples_leaf : 13; RF__n_estimators : 323;<br>RF__random_state : 14                                | 0.689628 | 0.73444  |
| XGB | SS       | ROS      | XGB__colsample_bytree : 0.1; XGB__gamma : 0.01;<br>XGB__max_depth : 1; XGB__min_child_weight : 0.0;<br>XGB__random_state : 0; XGB__scale_pos_weight : 2.5563713240556116; XGB__subsample : 0.580083322605866 | 0.689546 | 0.782886 |
| NN  | SS       | ADASYN   | NN__activation : logistic; NN__alpha : 10.0;<br>NN__hidden_layer_sizes : 50; NN__max_iter : 500;<br>NN__random_state : 0; NN__solver : lbfgs                                                                 | 0.68954  | 0.704045 |

|     |          |          |                                                                                                                                                                                                                                  |          |          |
|-----|----------|----------|----------------------------------------------------------------------------------------------------------------------------------------------------------------------------------------------------------------------------------|----------|----------|
| NN  | SS       | ADASYN   | NN__activation : logistic; NN__alpha : 10.0;<br>NN__hidden_layer_sizes : 4; NN__max_iter : 59;<br>NN__random_state : 0; NN__solver : lbfgs                                                                                       | 0.689523 | 0.704365 |
| NN  | Not used | Not used | NN__activation : tanh; NN__alpha : 10.0;<br>NN__hidden_layer_sizes : 3; NN__max_iter : 486;<br>NN__random_state : 0; NN__solver : lbfgs                                                                                          | 0.689433 | 0.714083 |
| NN  | SS       | ADASYN   | NN__activation : identity; NN__alpha : 0.0001;<br>NN__hidden_layer_sizes : 40; NN__max_iter : 497;<br>NN__random_state : 0; NN__solver : adam                                                                                    | 0.689419 | 0.701636 |
| XGB | SS       | ADASYN   | XGB__colsample_bytree : 0.5798993919824169;<br>XGB__gamma : 3.594635122330068;<br>XGB__max_depth : 1; XGB__min_child_weight : 0.0;<br>XGB__random_state : 0; XGB__scale_pos_weight : 0.5;<br>XGB__subsample : 0.6711929722506166 | 0.689362 | 0.754136 |
| XGB | MM       | SMOTE    | XGB__colsample_bytree : 0.67424325634792;<br>XGB__gamma : 5.457191084340767;<br>XGB__max_depth : 1; XGB__min_child_weight : 0.0;<br>XGB__random_state : 0; XGB__scale_pos_weight :<br>3.6228448439232492; XGB__subsample : 0.9   | 0.689215 | 0.76386  |
| NN  | MM       | ROS      | NN__activation : identity; NN__alpha : 0.0001;<br>NN__hidden_layer_sizes : 25; NN__max_iter : 50;<br>NN__random_state : 0; NN__solver : lbfgs                                                                                    | 0.689194 | 0.70215  |
| XGB | Not used | Not used | XGB__colsample_bytree : 0.306395007148906;<br>XGB__gamma : 0.9265721861190738;<br>XGB__max_depth : 1; XGB__min_child_weight :<br>1.0154839677303173; XGB__random_state : 0;<br>XGB__scale_pos_weight : 0.5; XGB__subsample : 0.9 | 0.689132 | 0.765692 |
| XGB | MM       | SMOTE    | XGB__colsample_bytree : 0.5728842704861302;<br>XGB__gamma : 6.021795747638219;<br>XGB__max_depth : 1; XGB__min_child_weight : 0.0;<br>XGB__random_state : 0; XGB__scale_pos_weight :                                             | 0.689127 | 0.76203  |



|     |          |          |                                                                                                                                                                                                                                |          |          |
|-----|----------|----------|--------------------------------------------------------------------------------------------------------------------------------------------------------------------------------------------------------------------------------|----------|----------|
|     |          |          | 3.98740617698512; XGB__subsample :<br>0.8330998515021423                                                                                                                                                                       |          |          |
| XGB | SS       | ROS      | XGB__colsample_bytree : 0.1; XGB__gamma : 0.01;<br>XGB__max_depth : 1; XGB__min_child_weight : 0.0;<br>XGB__random_state : 0; XGB__scale_pos_weight :<br>4.129769645270979; XGB__subsample : 0.5                               | 0.689097 | 0.778562 |
| NN  | SS       | SMOTE    | NN__activation : logistic; NN__alpha :<br>6.07913840947257; NN__hidden_layer_sizes : 50;<br>NN__max_iter : 50; NN__random_state : 0;<br>NN__solver : adam                                                                      | 0.689023 | 0.703601 |
| NN  | SS       | ROS      | NN__activation : tanh; NN__alpha : 0.0001;<br>NN__hidden_layer_sizes : 50; NN__max_iter : 50;<br>NN__random_state : 0; NN__solver : adam                                                                                       | 0.68902  | 0.706847 |
| NN  | MM       | ROS      | NN__activation : identity; NN__alpha :<br>1.0905857484072239; NN__hidden_layer_sizes : 10;<br>NN__max_iter : 500; NN__random_state : 0;<br>NN__solver : lbfgs                                                                  | 0.688987 | 0.700411 |
| XGB | MM       | ADASYN   | XGB__colsample_bytree : 1.0; XGB__gamma :<br>5.438958966584836; XGB__max_depth : 1;<br>XGB__min_child_weight : 0.0; XGB__random_state :<br>0; XGB__scale_pos_weight : 1.444798323656828;<br>XGB__subsample : 0.5               | 0.688986 | 0.765577 |
| XGB | Not used | Not used | XGB__colsample_bytree : 1.0; XGB__gamma :<br>8.03926030885034; XGB__max_depth : 1;<br>XGB__min_child_weight : 0.0; XGB__random_state :<br>0; XGB__scale_pos_weight : 3.7621340300083714;<br>XGB__subsample : 0.781695368008678 | 0.688984 | 0.761487 |
| XGB | MM       | ADASYN   | XGB__colsample_bytree : 1.0; XGB__gamma :<br>7.515115034838921; XGB__max_depth : 1;<br>XGB__min_child_weight : 0.0; XGB__random_state :                                                                                        | 0.68898  | 0.716864 |

|     |          |          |                                                                                                                                                                                                                                   |          |          |
|-----|----------|----------|-----------------------------------------------------------------------------------------------------------------------------------------------------------------------------------------------------------------------------------|----------|----------|
|     |          |          | 0; XGB__scale_pos_weight : 0.5; XGB__subsample : 0.5                                                                                                                                                                              |          |          |
| XGB | MM       | ADASYN   | XGB__colsample_bytree : 1.0; XGB__gamma : 11.057024575219641; XGB__max_depth : 5; XGB__min_child_weight : 0.0; XGB__random_state : 0; XGB__scale_pos_weight : 1.571408444289567; XGB__subsample : 0.5                             | 0.68898  | 0.773865 |
| NN  | MM       | ROS      | NN__activation : identity; NN__alpha : 1.3543790179385211; NN__hidden_layer_sizes : 3; NN__max_iter : 357; NN__random_state : 0; NN__solver : lbfgs                                                                               | 0.688902 | 0.700021 |
| NN  | SS       | ROS      | NN__activation : relu; NN__alpha : 10.0; NN__hidden_layer_sizes : 50; NN__max_iter : 500; NN__random_state : 0; NN__solver : adam                                                                                                 | 0.688902 | 0.705962 |
| NN  | MM       | ROS      | NN__activation : identity; NN__alpha : 0.0001; NN__hidden_layer_sizes : 50; NN__max_iter : 50; NN__random_state : 0; NN__solver : lbfgs                                                                                           | 0.688815 | 0.702133 |
| NN  | SS       | ROS      | NN__activation : identity; NN__alpha : 0.0001; NN__hidden_layer_sizes : 40; NN__max_iter : 122; NN__random_state : 0; NN__solver : lbfgs                                                                                          | 0.688815 | 0.702133 |
| XGB | SS       | SMOTE    | XGB__colsample_bytree : 0.181320495951649; XGB__gamma : 2.0410812235423212; XGB__max_depth : 1; XGB__min_child_weight : 7.86328897006377; XGB__random_state : 0; XGB__scale_pos_weight : 3.8569717111789372; XGB__subsample : 0.9 | 0.688812 | 0.761366 |
| XGB | Not used | Not used | XGB__colsample_bytree : 1.0; XGB__gamma : 10.878489531937504; XGB__max_depth : 4; XGB__min_child_weight : 0.0; XGB__random_state : 0; XGB__scale_pos_weight : 3.1389986492654187; XGB__subsample : 0.9                            | 0.688793 | 0.807072 |

|     |          |          |                                                                                                                                                                                                    |          |          |
|-----|----------|----------|----------------------------------------------------------------------------------------------------------------------------------------------------------------------------------------------------|----------|----------|
| XGB | SS       | ADASYN   | XGB__colsample_bytree : 0.1; XGB__gamma : 0.01;<br>XGB__max_depth : 1; XGB__min_child_weight : 0.0;<br>XGB__random_state : 0; XGB__scale_pos_weight : 0.5;<br>XGB__subsample : 0.9                 | 0.688768 | 0.773357 |
| NN  | SS       | ADASYN   | NN__activation : logistic; NN__alpha : 10.0;<br>NN__hidden_layer_sizes : 3; NN__max_iter : 50;<br>NN__random_state : 0; NN__solver : lbfgs                                                         | 0.688766 | 0.70438  |
| NN  | Not used | Not used | NN__activation : identity; NN__alpha :<br>0.00960372168030384; NN__hidden_layer_sizes : 4;<br>NN__max_iter : 500; NN__random_state : 0;<br>NN__solver : lbfgs                                      | 0.688763 | 0.703187 |
| NN  | Not used | Not used | NN__activation : identity; NN__alpha : 0.0001;<br>NN__hidden_layer_sizes : 4; NN__max_iter : 146;<br>NN__random_state : 0; NN__solver : lbfgs                                                      | 0.688453 | 0.702909 |
| NN  | SS       | ADASYN   | NN__activation : identity; NN__alpha : 10.0;<br>NN__hidden_layer_sizes : 20; NN__max_iter : 50;<br>NN__random_state : 0; NN__solver : lbfgs                                                        | 0.688438 | 0.704514 |
| XGB | MM       | ADASYN   | XGB__colsample_bytree : 1.0; XGB__gamma :<br>4.821937101666894; XGB__max_depth : 1;<br>XGB__min_child_weight : 0.0; XGB__random_state :<br>0; XGB__scale_pos_weight : 0.5; XGB__subsample :<br>0.5 | 0.688435 | 0.752236 |
| NN  | SS       | ADASYN   | NN__activation : identity; NN__alpha :<br>5.439673928658996; NN__hidden_layer_sizes : 50;<br>NN__max_iter : 50; NN__random_state : 0;<br>NN__solver : lbfgs                                        | 0.68842  | 0.704765 |
| NN  | Not used | Not used | NN__activation : identity; NN__alpha :<br>0.0417544842586434; NN__hidden_layer_sizes : 6;<br>NN__max_iter : 500; NN__random_state : 0;<br>NN__solver : lbfgs                                       | 0.688384 | 0.7031   |

|     |    |        |                                                                                                                                                                                                                                     |          |          |
|-----|----|--------|-------------------------------------------------------------------------------------------------------------------------------------------------------------------------------------------------------------------------------------|----------|----------|
| XGB | MM | ADASYN | XGB__colsample_bytree : 1.0; XGB__gamma : 5.20375706309181; XGB__max_depth : 1; XGB__min_child_weight : 0.0; XGB__random_state : 0; XGB__scale_pos_weight : 1.464186120029798; XGB__subsample : 0.5                                 | 0.688378 | 0.76575  |
| NN  | SS | ROS    | NN__activation : identity; NN__alpha : 1.2278635248432284; NN__hidden_layer_sizes : 27; NN__max_iter : 165; NN__random_state : 0; NN__solver : adam                                                                                 | 0.688367 | 0.701942 |
| XGB | SS | ADASYN | XGB__colsample_bytree : 1.0; XGB__gamma : 11.255443825347797; XGB__max_depth : 4; XGB__min_child_weight : 0.0; XGB__random_state : 0; XGB__scale_pos_weight : 5.0; XGB__subsample : 0.9                                             | 0.688327 | 0.831469 |
| NN  | SS | SMOTE  | NN__activation : logistic; NN__alpha : 0.43513970791520495; NN__hidden_layer_sizes : 40; NN__max_iter : 192; NN__random_state : 0; NN__solver : adam                                                                                | 0.688264 | 0.703614 |
| XGB | MM | ROS    | XGB__colsample_bytree : 1.0; XGB__gamma : 13.034380619531959; XGB__max_depth : 1; XGB__min_child_weight : 7.3565562570639775; XGB__random_state : 0; XGB__scale_pos_weight : 4.553474636855185; XGB__subsample : 0.7294030327236785 | 0.688149 | 0.738611 |
| XGB | SS | SMOTE  | XGB__colsample_bytree : 0.1707401115876679; XGB__gamma : 6.298649339001223; XGB__max_depth : 1; XGB__min_child_weight : 9.56810194026891; XGB__random_state : 0; XGB__scale_pos_weight : 5.0; XGB__subsample : 0.9                  | 0.688134 | 0.744455 |

|     |          |          |                                                                                                                                                                                                                                                    |          |          |
|-----|----------|----------|----------------------------------------------------------------------------------------------------------------------------------------------------------------------------------------------------------------------------------------------------|----------|----------|
| NN  | SS       | ADASYN   | NN__activation : identity; NN__alpha : 10.0;<br>NN__hidden_layer_sizes : 50; NN__max_iter : 500;<br>NN__random_state : 0; NN__solver : lbfgs                                                                                                       | 0.688059 | 0.704678 |
| NN  | SS       | ADASYN   | NN__activation : identity; NN__alpha : 10.0;<br>NN__hidden_layer_sizes : 3; NN__max_iter : 500;<br>NN__random_state : 0; NN__solver : lbfgs                                                                                                        | 0.688025 | 0.704688 |
| NN  | Not used | Not used | NN__activation : identity; NN__alpha :<br>0.009473292575666816; NN__hidden_layer_sizes : 4;<br>NN__max_iter : 500; NN__random_state : 0;<br>NN__solver : lbfgs                                                                                     | 0.688005 | 0.703148 |
| NN  | SS       | SMOTE    | NN__activation : logistic; NN__alpha :<br>5.451335018692285; NN__hidden_layer_sizes : 50;<br>NN__max_iter : 50; NN__random_state : 0;<br>NN__solver : adam                                                                                         | 0.687853 | 0.703625 |
| XGB | MM       | SMOTE    | XGB__colsample_bytree : 0.6842842891710897;<br>XGB__gamma : 7.813493954838153;<br>XGB__max_depth : 1; XGB__min_child_weight : 0.0;<br>XGB__random_state : 0; XGB__scale_pos_weight :<br>3.9791548904893723; XGB__subsample :<br>0.8325149428493588 | 0.687682 | 0.752031 |
| XGB | MM       | ADASYN   | XGB__colsample_bytree : 1.0; XGB__gamma :<br>4.284700058509442; XGB__max_depth : 1;<br>XGB__min_child_weight : 0.0; XGB__random_state :<br>0; XGB__scale_pos_weight : 0.5; XGB__subsample :<br>0.5                                                 | 0.687677 | 0.759733 |
| NN  | SS       | ADASYN   | NN__activation : identity; NN__alpha :<br>5.057387294024656; NN__hidden_layer_sizes : 4;<br>NN__max_iter : 153; NN__random_state : 0;<br>NN__solver : lbfgs                                                                                        | 0.687662 | 0.704673 |
| NN  | Not used | Not used | NN__activation : identity; NN__alpha :<br>0.0301999644723022; NN__hidden_layer_sizes : 10;                                                                                                                                                         | 0.687626 | 0.703085 |

|     |          |          |                                                                                                                                                                                                  |          |          |
|-----|----------|----------|--------------------------------------------------------------------------------------------------------------------------------------------------------------------------------------------------|----------|----------|
|     |          |          | NN__max_iter : 500; NN__random_state : 0;<br>NN__solver : lbfgs                                                                                                                                  |          |          |
| NN  | Not used | Not used | NN__activation : identity; NN__alpha :<br>0.03922808864950279; NN__hidden_layer_sizes : 6;<br>NN__max_iter : 500; NN__random_state : 0;<br>NN__solver : lbfgs                                    | 0.687592 | 0.703018 |
| NN  | MM       | ROS      | NN__activation : identity; NN__alpha :<br>0.31318205551038464; NN__hidden_layer_sizes : 6;<br>NN__max_iter : 50; NN__random_state : 0;<br>NN__solver : lbfgs                                     | 0.687559 | 0.70175  |
| XGB | SS       | ADASYN   | XGB__colsample_bytree : 0.1; XGB__gamma : 0.01;<br>XGB__max_depth : 1; XGB__min_child_weight : 0.0;<br>XGB__random_state : 0; XGB__scale_pos_weight :<br>4.999999999999999; XGB__subsample : 0.9 | 0.687475 | 0.774739 |
| NN  | SS       | ADASYN   | NN__activation : tanh; NN__alpha :<br>0.00046250380792257244; NN__hidden_layer_sizes :<br>40; NN__max_iter : 83; NN__random_state : 0;<br>NN__solver : adam                                      | 0.687454 | 0.702916 |
| NN  | SS       | SMOTE    | NN__activation : logistic; NN__alpha : 10.0;<br>NN__hidden_layer_sizes : 50; NN__max_iter : 50;<br>NN__random_state : 0; NN__solver : adam                                                       | 0.687439 | 0.703554 |
| NN  | SS       | ADASYN   | NN__activation : logistic; NN__alpha : 0.0001;<br>NN__hidden_layer_sizes : 50; NN__max_iter : 321;<br>NN__random_state : 0; NN__solver : adam                                                    | 0.687423 | 0.704161 |
| NN  | SS       | ROS      | NN__activation : tanh; NN__alpha : 10.0;<br>NN__hidden_layer_sizes : 5; NN__max_iter : 429;<br>NN__random_state : 0; NN__solver : lbfgs                                                          | 0.687421 | 0.706508 |
| XGB | MM       | SMOTE    | XGB__colsample_bytree : 0.6416547901500855;<br>XGB__gamma : 5.379018527502745;<br>XGB__max_depth : 1; XGB__min_child_weight : 0.0;                                                               | 0.687339 | 0.76513  |

|     |          |          |                                                                                                                                                                                         |          |          |
|-----|----------|----------|-----------------------------------------------------------------------------------------------------------------------------------------------------------------------------------------|----------|----------|
|     |          |          | XGB__random_state : 0; XGB__scale_pos_weight : 3.82219914081332; XGB__subsample : 0.9                                                                                                   |          |          |
| NN  | SS       | ADASYN   | NN__activation : identity; NN__alpha : 10.0; NN__hidden_layer_sizes : 40; NN__max_iter : 197; NN__random_state : 0; NN__solver : lbfgs                                                  | 0.687284 | 0.704746 |
| NN  | Not used | Not used | NN__activation : identity; NN__alpha : 0.0375186019885839; NN__hidden_layer_sizes : 6; NN__max_iter : 500; NN__random_state : 0; NN__solver : lbfgs                                     | 0.687264 | 0.703139 |
| NN  | Not used | Not used | NN__activation : identity; NN__alpha : 0.0001; NN__hidden_layer_sizes : 3; NN__max_iter : 130; NN__random_state : 0; NN__solver : lbfgs                                                 | 0.687247 | 0.70309  |
| NN  | Not used | Not used | NN__activation : identity; NN__alpha : 0.04508448195578453; NN__hidden_layer_sizes : 6; NN__max_iter : 500; NN__random_state : 0; NN__solver : lbfgs                                    | 0.687231 | 0.702937 |
| NN  | Not used | Not used | NN__activation : identity; NN__alpha : 0.015649016009266582; NN__hidden_layer_sizes : 10; NN__max_iter : 500; NN__random_state : 0; NN__solver : lbfgs                                  | 0.687229 | 0.703018 |
| XGB | Not used | Not used | XGB__colsample_bytree : 0.1; XGB__gamma : 0.01; XGB__max_depth : 1; XGB__min_child_weight : 0.0; XGB__random_state : 0; XGB__scale_pos_weight : 2.710211421062956; XGB__subsample : 0.9 | 0.687223 | 0.789563 |
| NN  | SS       | ADASYN   | NN__activation : identity; NN__alpha : 3.3117909977544056; NN__hidden_layer_sizes : 8; NN__max_iter : 473; NN__random_state : 0; NN__solver : lbfgs                                     | 0.687215 | 0.704852 |
| NN  | Not used | Not used | NN__activation : identity; NN__alpha : 0.013864640789074593; NN__hidden_layer_sizes : 10;                                                                                               | 0.687213 | 0.703109 |

|     |          |          |                                                                                                                                                                                                                   |          |          |
|-----|----------|----------|-------------------------------------------------------------------------------------------------------------------------------------------------------------------------------------------------------------------|----------|----------|
|     |          |          | NN__max_iter : 500; NN__random_state : 0;<br>NN__solver : lbfgs                                                                                                                                                   |          |          |
| NN  | Not used | Not used | NN__activation : identity; NN__alpha :<br>0.0428487733335792; NN__hidden_layer_sizes : 6;<br>NN__max_iter : 500; NN__random_state : 0;<br>NN__solver : lbfgs                                                      | 0.687197 | 0.702912 |
| NN  | MM       | ROS      | NN__activation : identity; NN__alpha :<br>0.24445194577764492; NN__hidden_layer_sizes : 35;<br>NN__max_iter : 405; NN__random_state : 0;<br>NN__solver : lbfgs                                                    | 0.687162 | 0.701967 |
| NN  | SS       | ADASYN   | NN__activation : logistic; NN__alpha :<br>0.04305231117279188; NN__hidden_layer_sizes : 50;<br>NN__max_iter : 499; NN__random_state : 0;<br>NN__solver : adam                                                     | 0.687044 | 0.704195 |
| NN  | Not used | Not used | NN__activation : identity; NN__alpha :<br>0.04570853433831053; NN__hidden_layer_sizes : 6;<br>NN__max_iter : 500; NN__random_state : 0;<br>NN__solver : lbfgs                                                     | 0.686834 | 0.703003 |
| XGB | Not used | Not used | XGB__colsample_bytree : 1.0; XGB__gamma : 0.01;<br>XGB__max_depth : 1; XGB__min_child_weight : 0.0;<br>XGB__random_state : 0; XGB__scale_pos_weight :<br>2.908258551955626; XGB__subsample : 0.9                  | 0.686754 | 0.802656 |
| NN  | MM       | ADASYN   | NN__activation : relu; NN__alpha :<br>3.9814946105106603; NN__hidden_layer_sizes : 15;<br>NN__max_iter : 427; NN__random_state : 0;<br>NN__solver : adam                                                          | 0.686685 | 0.697165 |
| XGB | SS       | SMOTE    | XGB__colsample_bytree : 1.0; XGB__gamma :<br>1.9017948765351307; XGB__max_depth : 1;<br>XGB__min_child_weight : 8.149836108001697;<br>XGB__random_state : 0; XGB__scale_pos_weight : 5.0;<br>XGB__subsample : 0.9 | 0.686682 | 0.768215 |



|     |          |          |                                                                                                                                                                                                                                                  |          |          |
|-----|----------|----------|--------------------------------------------------------------------------------------------------------------------------------------------------------------------------------------------------------------------------------------------------|----------|----------|
| XGB | MM       | SMOTE    | XGB__colsample_bytree : 0.665070071816777;<br>XGB__gamma : 6.333018425892856;<br>XGB__max_depth : 1; XGB__min_child_weight : 0.0;<br>XGB__random_state : 0; XGB__scale_pos_weight :<br>3.641847917547219; XGB__subsample :<br>0.8508568816277423 | 0.686657 | 0.759008 |
| XGB | Not used | Not used | XGB__colsample_bytree : 0.7632618764416226;<br>XGB__gamma : 11.800954452418459;<br>XGB__max_depth : 1; XGB__min_child_weight : 0.0;<br>XGB__random_state : 0; XGB__scale_pos_weight : 5.0;<br>XGB__subsample : 0.5997315910352279                | 0.686639 | 0.750917 |
| XGB | MM       | SMOTE    | XGB__colsample_bytree : 0.7865896772579317;<br>XGB__gamma : 4.080624907867269;<br>XGB__max_depth : 1; XGB__min_child_weight : 0.0;<br>XGB__random_state : 0; XGB__scale_pos_weight :<br>4.0280090908703805; XGB__subsample : 0.9                 | 0.686634 | 0.772403 |
| NN  | SS       | ADASYN   | NN__activation : logistic; NN__alpha :<br>0.43513970791520495; NN__hidden_layer_sizes : 40;<br>NN__max_iter : 192; NN__random_state : 0;<br>NN__solver : adam                                                                                    | 0.686544 | 0.699169 |
| NN  | Not used | Not used | NN__activation : identity; NN__alpha :<br>0.043914740925410284; NN__hidden_layer_sizes : 6;<br>NN__max_iter : 500; NN__random_state : 0;<br>NN__solver : lbfgs                                                                                   | 0.68649  | 0.702932 |
| NN  | Not used | Not used | NN__activation : identity; NN__alpha :<br>0.05358638384164173; NN__hidden_layer_sizes : 6;<br>NN__max_iter : 500; NN__random_state : 0;<br>NN__solver : lbfgs                                                                                    | 0.686455 | 0.702999 |
| NN  | Not used | Not used | NN__activation : identity; NN__alpha :<br>0.01122128879270935; NN__hidden_layer_sizes : 10;                                                                                                                                                      | 0.686455 | 0.703095 |

|     |          |          |                                                                                                                                                                                                                    |          |          |
|-----|----------|----------|--------------------------------------------------------------------------------------------------------------------------------------------------------------------------------------------------------------------|----------|----------|
|     |          |          | NN__max_iter : 500; NN__random_state : 0;<br>NN__solver : lbfgs                                                                                                                                                    |          |          |
| NN  | SS       | ADASYN   | NN__activation : logistic; NN__alpha :<br>0.00044991471422135625; NN__hidden_layer_sizes :<br>27; NN__max_iter : 452; NN__random_state : 0;<br>NN__solver : adam                                                   | 0.686421 | 0.703298 |
| NN  | SS       | ADASYN   | NN__activation : identity; NN__alpha :<br>0.0009214284259312227; NN__hidden_layer_sizes : 30;<br>NN__max_iter : 50; NN__random_state : 0;<br>NN__solver : adam                                                     | 0.686408 | 0.700694 |
| NN  | Not used | Not used | NN__activation : identity; NN__alpha :<br>0.01397339208400228; NN__hidden_layer_sizes : 10;<br>NN__max_iter : 500; NN__random_state : 0;<br>NN__solver : lbfgs                                                     | 0.686405 | 0.703095 |
| XGB | SS       | ROS      | XGB__colsample_bytree : 0.1; XGB__gamma : 0.01;<br>XGB__max_depth : 1; XGB__min_child_weight :<br>13.080933416539409; XGB__random_state : 0;<br>XGB__scale_pos_weight : 3.995624674375618;<br>XGB__subsample : 0.9 | 0.686377 | 0.759347 |
| XGB | MM       | ROS      | XGB__colsample_bytree : 1.0; XGB__gamma :<br>23.97177848430441; XGB__max_depth : 8;<br>XGB__min_child_weight : 0.0; XGB__random_state :<br>0; XGB__scale_pos_weight : 5.0; XGB__subsample :<br>0.6691298081725635  | 0.686317 | 0.798055 |
| XGB | SS       | ROS      | XGB__colsample_bytree : 1.0; XGB__gamma : 0.01;<br>XGB__max_depth : 1; XGB__min_child_weight :<br>16.523149769879616; XGB__random_state : 0;<br>XGB__scale_pos_weight : 5.0; XGB__subsample : 0.9                  | 0.686273 | 0.758686 |
| NN  | Not used | Not used | NN__activation : identity; NN__alpha :<br>0.41662566665749423; NN__hidden_layer_sizes : 3;                                                                                                                         | 0.686129 | 0.70296  |

|     |          |          |                                                                                                                                                                                                                              |          |          |
|-----|----------|----------|------------------------------------------------------------------------------------------------------------------------------------------------------------------------------------------------------------------------------|----------|----------|
|     |          |          | NN__max_iter : 500; NN__random_state : 0;<br>NN__solver : lbfgs                                                                                                                                                              |          |          |
| NN  | Not used | Not used | NN__activation : identity; NN__alpha :<br>0.040440309036605705; NN__hidden_layer_sizes : 6;<br>NN__max_iter : 500; NN__random_state : 0;<br>NN__solver : lbfgs                                                               | 0.686093 | 0.703096 |
| NN  | Not used | Not used | NN__activation : identity; NN__alpha :<br>0.043636434202618694; NN__hidden_layer_sizes : 6;<br>NN__max_iter : 500; NN__random_state : 0;<br>NN__solver : lbfgs                                                               | 0.686077 | 0.7031   |
| NN  | Not used | Not used | NN__activation : identity; NN__alpha :<br>0.03795004970390232; NN__hidden_layer_sizes : 6;<br>NN__max_iter : 500; NN__random_state : 0;<br>NN__solver : lbfgs                                                                | 0.686059 | 0.703003 |
| NN  | Not used | Not used | NN__activation : identity; NN__alpha :<br>0.03781777508749155; NN__hidden_layer_sizes : 6;<br>NN__max_iter : 500; NN__random_state : 0;<br>NN__solver : lbfgs                                                                | 0.686042 | 0.703134 |
| NN  | Not used | Not used | NN__activation : identity; NN__alpha :<br>0.025670769542096534; NN__hidden_layer_sizes : 22;<br>NN__max_iter : 500; NN__random_state : 0;<br>NN__solver : lbfgs                                                              | 0.686024 | 0.702975 |
| XGB | Not used | Not used | XGB__colsample_bytree : 1.0; XGB__gamma :<br>6.62183984453924; XGB__max_depth : 1;<br>XGB__min_child_weight : 0.0; XGB__random_state :<br>0; XGB__scale_pos_weight : 3.8091146094219717;<br>XGB__subsample : 0.8968131174212 | 0.686005 | 0.763068 |
| XGB | SS       | ADASYN   | XGB__colsample_bytree : 1.0; XGB__gamma :<br>5.19326877350158; XGB__max_depth : 1;<br>XGB__min_child_weight : 0.0; XGB__random_state :                                                                                       | 0.685894 | 0.764627 |

|     |          |          |                                                                                                                                                                                                                   |          |          |
|-----|----------|----------|-------------------------------------------------------------------------------------------------------------------------------------------------------------------------------------------------------------------|----------|----------|
|     |          |          | 0; XGB__scale_pos_weight : 1.1792763822325183;<br>XGB__subsample : 0.5                                                                                                                                            |          |          |
| XGB | MM       | ADASYN   | XGB__colsample_bytree : 0.1; XGB__gamma : 0.01;<br>XGB__max_depth : 1; XGB__min_child_weight : 0.0;<br>XGB__random_state : 0; XGB__scale_pos_weight :<br>3.2919024155881385; XGB__subsample : 0.9                 | 0.685827 | 0.776299 |
| NN  | SS       | ADASYN   | NN__activation : logistic; NN__alpha :<br>0.22837885717498688; NN__hidden_layer_sizes : 50;<br>NN__max_iter : 500; NN__random_state : 0;<br>NN__solver : adam                                                     | 0.685804 | 0.703748 |
| XGB | SS       | SMOTE    | XGB__colsample_bytree : 1.0; XGB__gamma :<br>4.328942673249065; XGB__max_depth : 1;<br>XGB__min_child_weight : 1.4814464697611438;<br>XGB__random_state : 0; XGB__scale_pos_weight : 5.0;<br>XGB__subsample : 0.9 | 0.685777 | 0.767624 |
| NN  | Not used | Not used | NN__activation : identity; NN__alpha : 10.0;<br>NN__hidden_layer_sizes : 50; NN__max_iter : 500;<br>NN__random_state : 0; NN__solver : lbfgs                                                                      | 0.685773 | 0.701371 |
| NN  | Not used | Not used | NN__activation : identity; NN__alpha :<br>0.04095316977413132; NN__hidden_layer_sizes : 6;<br>NN__max_iter : 500; NN__random_state : 0;<br>NN__solver : lbfgs                                                     | 0.685732 | 0.702994 |
| XGB | SS       | SMOTE    | XGB__colsample_bytree : 1.0; XGB__gamma : 0.01;<br>XGB__max_depth : 1; XGB__min_child_weight :<br>14.260508560698518; XGB__random_state : 0;<br>XGB__scale_pos_weight : 5.0; XGB__subsample : 0.9                 | 0.685671 | 0.755818 |
| NN  | SS       | ADASYN   | NN__activation : identity; NN__alpha :<br>1.6524873646335299; NN__hidden_layer_sizes : 3;<br>NN__max_iter : 50; NN__random_state : 0;<br>NN__solver : lbfgs                                                       | 0.685665 | 0.704775 |

|     |          |          |                                                                                                                                                                                                                                      |          |          |
|-----|----------|----------|--------------------------------------------------------------------------------------------------------------------------------------------------------------------------------------------------------------------------------------|----------|----------|
| NN  | Not used | Not used | NN__activation : identity; NN__alpha : 0.042433570795289574; NN__hidden_layer_sizes : 6; NN__max_iter : 500; NN__random_state : 0; NN__solver : lbfgs                                                                                | 0.685663 | 0.703009 |
| NN  | Not used | Not used | NN__activation : identity; NN__alpha : 10.0; NN__hidden_layer_sizes : 3; NN__max_iter : 500; NN__random_state : 0; NN__solver : lbfgs                                                                                                | 0.685395 | 0.701432 |
| XGB | MM       | ROS      | XGB__colsample_bytree : 1.0; XGB__gamma : 14.506826759274759; XGB__max_depth : 1; XGB__min_child_weight : 10.702249995013977; XGB__random_state : 0; XGB__scale_pos_weight : 3.7398854666430434; XGB__subsample : 0.7295681381996688 | 0.685354 | 0.735675 |
| XGB | SS       | ROS      | XGB__colsample_bytree : 0.1; XGB__gamma : 0.01; XGB__max_depth : 1; XGB__min_child_weight : 0.0; XGB__random_state : 0; XGB__scale_pos_weight : 3.3935025100209266; XGB__subsample : 0.5590918819212974                              | 0.685275 | 0.781511 |
| NN  | SS       | ADASYN   | NN__activation : identity; NN__alpha : 0.013930278588117039; NN__hidden_layer_sizes : 3; NN__max_iter : 500; NN__random_state : 0; NN__solver : lbfgs                                                                                | 0.685252 | 0.704823 |
| NN  | MM       | ADASYN   | NN__activation : relu; NN__alpha : 10.0; NN__hidden_layer_sizes : 15; NN__max_iter : 431; NN__random_state : 0; NN__solver : adam                                                                                                    | 0.685237 | 0.693502 |
| XGB | SS       | ADASYN   | XGB__colsample_bytree : 1.0; XGB__gamma : 13.762364455948857; XGB__max_depth : 6; XGB__min_child_weight : 0.0; XGB__random_state : 0; XGB__scale_pos_weight : 5.0; XGB__subsample : 0.9                                              | 0.685213 | 0.836589 |

|     |          |          |                                                                                                                                                                                                                                    |          |          |
|-----|----------|----------|------------------------------------------------------------------------------------------------------------------------------------------------------------------------------------------------------------------------------------|----------|----------|
| XGB | SS       | ROS      | XGB__colsample_bytree : 0.9571430619381621;<br>XGB__gamma : 0.01; XGB__max_depth : 1;<br>XGB__min_child_weight : 0.0; XGB__random_state :<br>0; XGB__scale_pos_weight : 1.7918028137222497;<br>XGB__subsample : 0.5351811764646127 | 0.685131 | 0.792058 |
| NN  | SS       | ROS      | NN__activation : relu; NN__alpha :<br>3.9814946105106603; NN__hidden_layer_sizes : 15;<br>NN__max_iter : 427; NN__random_state : 0;<br>NN__solver : adam                                                                           | 0.685093 | 0.721917 |
| NN  | MM       | ADASYN   | NN__activation : relu; NN__alpha :<br>4.623397721291552; NN__hidden_layer_sizes : 15;<br>NN__max_iter : 391; NN__random_state : 0;<br>NN__solver : adam                                                                            | 0.684965 | 0.695928 |
| XGB | Not used | Not used | XGB__colsample_bytree : 1.0; XGB__gamma :<br>9.889675159430956; XGB__max_depth : 1;<br>XGB__min_child_weight : 0.0; XGB__random_state :<br>0; XGB__scale_pos_weight : 3.772849164955461;<br>XGB__subsample : 0.7190708844277698    | 0.684951 | 0.755873 |
| NN  | Not used | Not used | NN__activation : identity; NN__alpha :<br>0.24450918748319259; NN__hidden_layer_sizes : 10;<br>NN__max_iter : 242; NN__random_state : 0;<br>NN__solver : lbfgs                                                                     | 0.684942 | 0.703014 |
| NN  | SS       | ADASYN   | NN__activation : identity; NN__alpha :<br>0.5411600543905455; NN__hidden_layer_sizes : 50;<br>NN__max_iter : 50; NN__random_state : 0;<br>NN__solver : lbfgs                                                                       | 0.684873 | 0.704598 |
| XGB | MM       | SMOTE    | XGB__colsample_bytree : 0.1; XGB__gamma : 0.01;<br>XGB__max_depth : 1; XGB__min_child_weight : 0.0;<br>XGB__random_state : 0; XGB__scale_pos_weight : 0.5;<br>XGB__subsample : 0.6361967644248446                                  | 0.684866 | 0.769664 |

|     |          |          |                                                                                                                                                                                                                                                     |          |          |
|-----|----------|----------|-----------------------------------------------------------------------------------------------------------------------------------------------------------------------------------------------------------------------------------------------------|----------|----------|
| NN  | SS       | SMOTE    | NN__activation : tanh; NN__alpha :<br>2.6096146808538574; NN__hidden_layer_sizes : 8;<br>NN__max_iter : 478; NN__random_state : 0;<br>NN__solver : adam                                                                                             | 0.684801 | 0.712205 |
| XGB | Not used | Not used | XGB__colsample_bytree : 0.42030240747014935;<br>XGB__gamma : 0.01; XGB__max_depth : 1;<br>XGB__min_child_weight : 0.12070101753670352;<br>XGB__random_state : 0; XGB__scale_pos_weight : 0.5;<br>XGB__subsample : 0.9                               | 0.684653 | 0.789845 |
| NN  | SS       | ADASYN   | NN__activation : identity; NN__alpha : 0.0001;<br>NN__hidden_layer_sizes : 50; NN__max_iter : 500;<br>NN__random_state : 0; NN__solver : lbfgs                                                                                                      | 0.684494 | 0.704842 |
| NN  | SS       | ADASYN   | NN__activation : identity; NN__alpha : 0.0001;<br>NN__hidden_layer_sizes : 7; NN__max_iter : 500;<br>NN__random_state : 0; NN__solver : adam                                                                                                        | 0.684491 | 0.701181 |
| XGB | MM       | ADASYN   | XGB__colsample_bytree : 0.1; XGB__gamma : 0.01;<br>XGB__max_depth : 1; XGB__min_child_weight : 0.0;<br>XGB__random_state : 0; XGB__scale_pos_weight :<br>2.3561711330511446; XGB__subsample : 0.9                                                   | 0.684465 | 0.776834 |
| XGB | MM       | ROS      | XGB__colsample_bytree : 1.0; XGB__gamma :<br>12.403338344335701; XGB__max_depth : 1;<br>XGB__min_child_weight : 12.947512177353046;<br>XGB__random_state : 0; XGB__scale_pos_weight :<br>3.6619985925099057; XGB__subsample :<br>0.8003847597690481 | 0.684395 | 0.73623  |
| XGB | MM       | ADASYN   | XGB__colsample_bytree : 0.1; XGB__gamma : 0.01;<br>XGB__max_depth : 1; XGB__min_child_weight : 0.0;<br>XGB__random_state : 0; XGB__scale_pos_weight :<br>2.750867312591029; XGB__subsample : 0.9                                                    | 0.684103 | 0.776915 |
| XGB | MM       | ADASYN   | XGB__colsample_bytree : 0.9161986022010945;<br>XGB__gamma : 14.708965317754027;                                                                                                                                                                     | 0.684093 | 0.8001   |

|     |          |          |                                                                                                                                                                                                                                                   |          |          |
|-----|----------|----------|---------------------------------------------------------------------------------------------------------------------------------------------------------------------------------------------------------------------------------------------------|----------|----------|
|     |          |          | XGB__max_depth : 5; XGB__min_child_weight : 0.0;<br>XGB__random_state : 0; XGB__scale_pos_weight :<br>3.405378827602404; XGB__subsample : 0.9                                                                                                     |          |          |
| XGB | MM       | ADASYN   | XGB__colsample_bytree : 0.1; XGB__gamma : 0.01;<br>XGB__max_depth : 1; XGB__min_child_weight : 0.0;<br>XGB__random_state : 0; XGB__scale_pos_weight :<br>2.3036705290606543; XGB__subsample : 0.9                                                 | 0.684086 | 0.777034 |
| XGB | Not used | Not used | XGB__colsample_bytree : 0.22631499503043714;<br>XGB__gamma : 2.37161859052575; XGB__max_depth :<br>1; XGB__min_child_weight : 0.0;<br>XGB__random_state : 0; XGB__scale_pos_weight :<br>4.491758075821906; XGB__subsample :<br>0.8296146597514118 | 0.684071 | 0.784008 |
| XGB | SS       | ADASYN   | XGB__colsample_bytree : 0.1; XGB__gamma :<br>4.209438230604554; XGB__max_depth : 1;<br>XGB__min_child_weight : 0.0; XGB__random_state :<br>0; XGB__scale_pos_weight : 5.0; XGB__subsample :<br>0.9                                                | 0.683986 | 0.766442 |
| NN  | MM       | ROS      | NN__activation : identity; NN__alpha :<br>0.04805857396436818; NN__hidden_layer_sizes : 50;<br>NN__max_iter : 500; NN__random_state : 0;<br>NN__solver : adam                                                                                     | 0.68394  | 0.698878 |
| XGB | Not used | Not used | XGB__colsample_bytree : 1.0; XGB__gamma :<br>8.039658846222679; XGB__max_depth : 1;<br>XGB__min_child_weight : 0.0; XGB__random_state :<br>0; XGB__scale_pos_weight : 3.367356397977191;<br>XGB__subsample : 0.748378773480607                    | 0.683835 | 0.763822 |
| NN  | MM       | ADASYN   | NN__activation : identity; NN__alpha :<br>0.015191029773769228; NN__hidden_layer_sizes : 35;<br>NN__max_iter : 500; NN__random_state : 0;<br>NN__solver : lbfgs                                                                                   | 0.683789 | 0.704498 |



|     |          |          |                                                                                                                                                                                                                      |          |          |
|-----|----------|----------|----------------------------------------------------------------------------------------------------------------------------------------------------------------------------------------------------------------------|----------|----------|
| NN  | MM       | ADASYN   | NN__activation : identity; NN__alpha : 0.4367664749354218; NN__hidden_layer_sizes : 30; NN__max_iter : 50; NN__random_state : 0; NN__solver : lbfgs                                                                  | 0.683771 | 0.704279 |
| XGB | Not used | Not used | XGB__colsample_bytree : 1.0; XGB__gamma : 7.9045090750170335; XGB__max_depth : 1; XGB__min_child_weight : 0.0; XGB__random_state : 0; XGB__scale_pos_weight : 3.6597051214002723; XGB__subsample : 0.782868036600278 | 0.683715 | 0.762757 |
| NN  | SS       | ROS      | NN__activation : identity; NN__alpha : 0.0001; NN__hidden_layer_sizes : 3; NN__max_iter : 500; NN__random_state : 0; NN__solver : adam                                                                               | 0.683702 | 0.69708  |
| NN  | MM       | ROS      | NN__activation : relu; NN__alpha : 0.25133758836084097; NN__hidden_layer_sizes : 3; NN__max_iter : 50; NN__random_state : 0; NN__solver : lbfgs                                                                      | 0.683668 | 0.710854 |
| XGB | SS       | ADASYN   | XGB__colsample_bytree : 1.0; XGB__gamma : 5.764439719589001; XGB__max_depth : 2; XGB__min_child_weight : 0.0; XGB__random_state : 0; XGB__scale_pos_weight : 0.9009281752791984; XGB__subsample : 0.9                | 0.683607 | 0.781639 |
| NN  | SS       | SMOTE    | NN__activation : logistic; NN__alpha : 10.0; NN__hidden_layer_sizes : 3; NN__max_iter : 50; NN__random_state : 0; NN__solver : lbfgs                                                                                 | 0.683425 | 0.703687 |
| NN  | MM       | ADASYN   | NN__activation : identity; NN__alpha : 0.07632752579983847; NN__hidden_layer_sizes : 40; NN__max_iter : 50; NN__random_state : 0; NN__solver : lbfgs                                                                 | 0.68341  | 0.704611 |
| NN  | MM       | ADASYN   | NN__activation : identity; NN__alpha : 0.0005233146462783461; NN__hidden_layer_sizes : 35;                                                                                                                           | 0.683392 | 0.704476 |

|    |    |        |                                                                                                                                                                 |          |          |
|----|----|--------|-----------------------------------------------------------------------------------------------------------------------------------------------------------------|----------|----------|
|    |    |        | NN__max_iter : 215; NN__random_state : 0;<br>NN__solver : lbfgs                                                                                                 |          |          |
| NN | MM | ADASYN | NN__activation : identity; NN__alpha :<br>0.46260455085651814; NN__hidden_layer_sizes : 50;<br>NN__max_iter : 50; NN__random_state : 0;<br>NN__solver : lbfgs   | 0.683358 | 0.704315 |
| NN | MM | ADASYN | NN__activation : identity; NN__alpha :<br>1.1910302863117617; NN__hidden_layer_sizes : 50;<br>NN__max_iter : 50; NN__random_state : 0;<br>NN__solver : lbfgs    | 0.68334  | 0.703931 |
| NN | MM | ADASYN | NN__activation : relu; NN__alpha : 10.0;<br>NN__hidden_layer_sizes : 15; NN__max_iter : 273;<br>NN__random_state : 0; NN__solver : adam                         | 0.683258 | 0.694635 |
| NN | MM | ADASYN | NN__activation : identity; NN__alpha : 0.0001;<br>NN__hidden_layer_sizes : 25; NN__max_iter : 251;<br>NN__random_state : 0; NN__solver : lbfgs                  | 0.683014 | 0.704491 |
| NN | SS | SMOTE  | NN__activation : logistic; NN__alpha : 10.0;<br>NN__hidden_layer_sizes : 50; NN__max_iter : 50;<br>NN__random_state : 0; NN__solver : lbfgs                     | 0.683012 | 0.703736 |
| NN | MM | ADASYN | NN__activation : identity; NN__alpha :<br>0.006108717856811489; NN__hidden_layer_sizes : 30;<br>NN__max_iter : 169; NN__random_state : 0;<br>NN__solver : lbfgs | 0.682997 | 0.704472 |
| NN | MM | ADASYN | NN__activation : identity; NN__alpha :<br>0.003515280422858324; NN__hidden_layer_sizes : 50;<br>NN__max_iter : 313; NN__random_state : 0;<br>NN__solver : lbfgs | 0.682979 | 0.7045   |
| NN | MM | ADASYN | NN__activation : identity; NN__alpha :<br>0.047220733687036824; NN__hidden_layer_sizes : 30;<br>NN__max_iter : 268; NN__random_state : 0;<br>NN__solver : lbfgs | 0.682961 | 0.704428 |

|     |          |          |                                                                                                                                                                                                                                  |          |          |
|-----|----------|----------|----------------------------------------------------------------------------------------------------------------------------------------------------------------------------------------------------------------------------------|----------|----------|
| NN  | MM       | ADASYN   | NN__activation : identity; NN__alpha :<br>0.7101916142921896; NN__hidden_layer_sizes : 50;<br>NN__max_iter : 50; NN__random_state : 0;<br>NN__solver : lbfgs                                                                     | 0.682945 | 0.7041   |
| XGB | MM       | SMOTE    | XGB__colsample_bytree : 0.6423885696122095;<br>XGB__gamma : 5.416358342759316;<br>XGB__max_depth : 1; XGB__min_child_weight : 0.0;<br>XGB__random_state : 0; XGB__scale_pos_weight :<br>4.1828896028689755; XGB__subsample : 0.9 | 0.682913 | 0.764909 |
| NN  | MM       | ROS      | NN__activation : identity; NN__alpha :<br>0.009832373675930922; NN__hidden_layer_sizes : 50;<br>NN__max_iter : 500; NN__random_state : 0;<br>NN__solver : adam                                                                   | 0.682769 | 0.698948 |
| NN  | MM       | ROS      | NN__activation : logistic; NN__alpha :<br>0.470830948133204; NN__hidden_layer_sizes : 3;<br>NN__max_iter : 500; NN__random_state : 0;<br>NN__solver : lbfgs                                                                      | 0.68272  | 0.702675 |
| NN  | MM       | ADASYN   | NN__activation : identity; NN__alpha : 0.0001;<br>NN__hidden_layer_sizes : 27; NN__max_iter : 213;<br>NN__random_state : 0; NN__solver : lbfgs                                                                                   | 0.682635 | 0.704515 |
| NN  | MM       | ADASYN   | NN__activation : identity; NN__alpha :<br>0.2077497530138646; NN__hidden_layer_sizes : 50;<br>NN__max_iter : 50; NN__random_state : 0;<br>NN__solver : lbfgs                                                                     | 0.682617 | 0.704387 |
| NN  | MM       | ADASYN   | NN__activation : identity; NN__alpha :<br>1.1411043710947752; NN__hidden_layer_sizes : 50;<br>NN__max_iter : 50; NN__random_state : 0;<br>NN__solver : lbfgs                                                                     | 0.682548 | 0.704071 |
| XGB | Not used | Not used | XGB__colsample_bytree : 1.0; XGB__gamma :<br>10.94345897801498; XGB__max_depth : 1;<br>XGB__min_child_weight : 0.0; XGB__random_state :                                                                                          | 0.682527 | 0.741475 |

|     |          |          |                                                                                                                                                                                                                                                                   |          |          |
|-----|----------|----------|-------------------------------------------------------------------------------------------------------------------------------------------------------------------------------------------------------------------------------------------------------------------|----------|----------|
|     |          |          | 0; XGB__scale_pos_weight : 3.133561678682152;<br>XGB__subsample : 0.9                                                                                                                                                                                             |          |          |
| XGB | SS       | ADASYN   | XGB__colsample_bytree : 1.0; XGB__gamma :<br>9.102724944750237; XGB__max_depth : 1;<br>XGB__min_child_weight : 0.0; XGB__random_state :<br>0; XGB__scale_pos_weight : 0.5; XGB__subsample :<br>0.5                                                                | 0.682503 | 0.699383 |
| XGB | Not used | Not used | XGB__colsample_bytree : 0.4307331304755524;<br>XGB__gamma : 13.863043802398858;<br>XGB__max_depth : 7; XGB__min_child_weight :<br>2.3115453865193447; XGB__random_state : 0;<br>XGB__scale_pos_weight : 3.335600082637225;<br>XGB__subsample : 0.7814117169683723 | 0.682349 | 0.757209 |
| NN  | MM       | ADASYN   | NN__activation : relu; NN__alpha :<br>5.498044012529747; NN__hidden_layer_sizes : 15;<br>NN__max_iter : 500; NN__random_state : 0;<br>NN__solver : adam                                                                                                           | 0.682054 | 0.695197 |
| NN  | SS       | ROS      | NN__activation : logistic; NN__alpha :<br>3.9229485139656597; NN__hidden_layer_sizes : 5;<br>NN__max_iter : 245; NN__random_state : 0;<br>NN__solver : adam                                                                                                       | 0.682031 | 0.697034 |
| XGB | SS       | SMOTE    | XGB__colsample_bytree : 1.0; XGB__gamma :<br>7.393987926889745; XGB__max_depth : 1;<br>XGB__min_child_weight : 6.3651285508379045;<br>XGB__random_state : 0; XGB__scale_pos_weight : 5.0;<br>XGB__subsample : 0.9                                                 | 0.681965 | 0.752082 |
| XGB | SS       | ADASYN   | XGB__colsample_bytree : 0.6346538594327273;<br>XGB__gamma : 0.01; XGB__max_depth : 1;<br>XGB__min_child_weight : 0.0; XGB__random_state :<br>0; XGB__scale_pos_weight : 0.5; XGB__subsample :<br>0.9                                                              | 0.681964 | 0.778492 |

|     |    |        |                                                                                                                                                                                                                                                   |          |          |
|-----|----|--------|---------------------------------------------------------------------------------------------------------------------------------------------------------------------------------------------------------------------------------------------------|----------|----------|
| XGB | SS | SMOTE  | XGB__colsample_bytree : 0.1; XGB__gamma : 0.01;<br>XGB__max_depth : 1; XGB__min_child_weight :<br>8.649141882223175; XGB__random_state : 0;<br>XGB__scale_pos_weight : 5.0; XGB__subsample : 0.9                                                  | 0.681866 | 0.763403 |
| XGB | SS | ADASYN | XGB__colsample_bytree : 1.0; XGB__gamma :<br>5.179712432626178; XGB__max_depth : 1;<br>XGB__min_child_weight : 0.0; XGB__random_state :<br>0; XGB__scale_pos_weight : 1.4529652701728988;<br>XGB__subsample : 0.9                                 | 0.681865 | 0.762017 |
| XGB | MM | SMOTE  | XGB__colsample_bytree : 0.5063398125315677;<br>XGB__gamma : 9.711199250149726;<br>XGB__max_depth : 1; XGB__min_child_weight : 0.0;<br>XGB__random_state : 0; XGB__scale_pos_weight : 5.0;<br>XGB__subsample : 0.9                                 | 0.681785 | 0.743323 |
| XGB | MM | ROS    | XGB__colsample_bytree : 1.0; XGB__gamma :<br>20.288359564977508; XGB__max_depth : 4;<br>XGB__min_child_weight : 8.587909765136308;<br>XGB__random_state : 0; XGB__scale_pos_weight :<br>4.748599083219661; XGB__subsample :<br>0.6779029474061055 | 0.681703 | 0.758022 |
| XGB | MM | SMOTE  | XGB__colsample_bytree : 1.0; XGB__gamma :<br>8.536029719846876; XGB__max_depth : 1;<br>XGB__min_child_weight : 0.0; XGB__random_state :<br>0; XGB__scale_pos_weight : 5.0; XGB__subsample :<br>0.9                                                | 0.681694 | 0.752827 |
| XGB | MM | SMOTE  | XGB__colsample_bytree : 0.20863147515778596;<br>XGB__gamma : 0.01; XGB__max_depth : 1;<br>XGB__min_child_weight : 0.0; XGB__random_state :<br>0; XGB__scale_pos_weight : 4.400072765013536;<br>XGB__subsample : 0.9                               | 0.681225 | 0.777622 |

|     |    |        |                                                                                                                                                                                                                                 |          |          |
|-----|----|--------|---------------------------------------------------------------------------------------------------------------------------------------------------------------------------------------------------------------------------------|----------|----------|
| NN  | SS | ROS    | NN__activation : relu; NN__alpha :<br>4.975636992427353; NN__hidden_layer_sizes : 6;<br>NN__max_iter : 135; NN__random_state : 0;<br>NN__solver : adam                                                                          | 0.681115 | 0.686752 |
| NN  | MM | ROS    | NN__activation : tanh; NN__alpha : 0.0001;<br>NN__hidden_layer_sizes : 50; NN__max_iter : 500;<br>NN__random_state : 0; NN__solver : adam                                                                                       | 0.680911 | 0.69967  |
| NN  | SS | ROS    | NN__activation : identity; NN__alpha :<br>0.04506632524476747; NN__hidden_layer_sizes : 8;<br>NN__max_iter : 389; NN__random_state : 0;<br>NN__solver : adam                                                                    | 0.680792 | 0.695909 |
| XGB | MM | ROS    | XGB__colsample_bytree : 1.0; XGB__gamma :<br>18.676681527877843; XGB__max_depth : 2;<br>XGB__min_child_weight : 0.0; XGB__random_state :<br>0; XGB__scale_pos_weight : 4.048327124084032;<br>XGB__subsample : 0.696019224850727 | 0.680786 | 0.761447 |
| NN  | MM | ROS    | NN__activation : tanh; NN__alpha :<br>0.6395547662686945; NN__hidden_layer_sizes : 22;<br>NN__max_iter : 500; NN__random_state : 0;<br>NN__solver : adam                                                                        | 0.6806   | 0.696224 |
| NN  | SS | SMOTE  | NN__activation : tanh; NN__alpha :<br>0.3184983766348907; NN__hidden_layer_sizes : 35;<br>NN__max_iter : 237; NN__random_state : 0;<br>NN__solver : adam                                                                        | 0.680529 | 0.726873 |
| XGB | SS | ADASYN | XGB__colsample_bytree : 1.0; XGB__gamma :<br>7.144083521934234; XGB__max_depth : 1;<br>XGB__min_child_weight : 0.0; XGB__random_state :<br>0; XGB__scale_pos_weight : 3.208751930190358;<br>XGB__subsample : 0.5                | 0.680509 | 0.761548 |
| NN  | MM | ROS    | NN__activation : tanh; NN__alpha :<br>0.00037911622348291683; NN__hidden_layer_sizes :                                                                                                                                          | 0.680497 | 0.698334 |

|     |    |        |                                                                                                                                                                                                    |          |          |
|-----|----|--------|----------------------------------------------------------------------------------------------------------------------------------------------------------------------------------------------------|----------|----------|
|     |    |        | 27; NN__max_iter : 500; NN__random_state : 0;<br>NN__solver : adam                                                                                                                                 |          |          |
| NN  | MM | ADASYN | NN__activation : logistic; NN__alpha : 0.0001;<br>NN__hidden_layer_sizes : 15; NN__max_iter : 335;<br>NN__random_state : 0; NN__solver : adam                                                      | 0.68048  | 0.694317 |
| XGB | MM | ADASYN | XGB__colsample_bytree : 0.1; XGB__gamma : 0.01;<br>XGB__max_depth : 1; XGB__min_child_weight :<br>2.2277798404256646; XGB__random_state : 0;<br>XGB__scale_pos_weight : 5.0; XGB__subsample : 0.9  | 0.680474 | 0.770889 |
| XGB | SS | ROS    | XGB__colsample_bytree : 0.1; XGB__gamma :<br>9.249654634328682; XGB__max_depth : 1;<br>XGB__min_child_weight : 0.0; XGB__random_state :<br>0; XGB__scale_pos_weight : 5.0; XGB__subsample :<br>0.5 | 0.680474 | 0.746708 |
| XGB | SS | ADASYN | XGB__colsample_bytree : 1.0; XGB__gamma :<br>10.22900649487368; XGB__max_depth : 1;<br>XGB__min_child_weight : 0.0; XGB__random_state :<br>0; XGB__scale_pos_weight : 5.0; XGB__subsample :<br>0.9 | 0.680367 | 0.745488 |
| NN  | SS | SMOTE  | NN__activation : tanh; NN__alpha : 10.0;<br>NN__hidden_layer_sizes : 50; NN__max_iter : 500;<br>NN__random_state : 0; NN__solver : adam                                                            | 0.680326 | 0.703895 |
| NN  | SS | SMOTE  | NN__activation : identity; NN__alpha : 10.0;<br>NN__hidden_layer_sizes : 50; NN__max_iter : 467;<br>NN__random_state : 0; NN__solver : adam                                                        | 0.680223 | 0.703722 |
| XGB | SS | ADASYN | XGB__colsample_bytree : 0.1; XGB__gamma : 0.01;<br>XGB__max_depth : 1; XGB__min_child_weight : 0.0;<br>XGB__random_state : 0; XGB__scale_pos_weight : 5.0;<br>XGB__subsample : 0.5356068644759493  | 0.680122 | 0.762193 |

|     |    |        |                                                                                                                                                                                                   |          |          |
|-----|----|--------|---------------------------------------------------------------------------------------------------------------------------------------------------------------------------------------------------|----------|----------|
| NN  | MM | ROS    | NN__activation : relu; NN__alpha : 5.00909433339747;<br>NN__hidden_layer_sizes : 3; NN__max_iter : 304;<br>NN__random_state : 0; NN__solver : lbfgs                                               | 0.680052 | 0.693821 |
| XGB | SS | ROS    | XGB__colsample_bytree : 1.0; XGB__gamma : 0.01;<br>XGB__max_depth : 1; XGB__min_child_weight : 0.0;<br>XGB__random_state : 0; XGB__scale_pos_weight :<br>2.273230091187787; XGB__subsample : 0.9  | 0.679928 | 0.795125 |
| NN  | MM | ROS    | NN__activation : tanh; NN__alpha :<br>0.0020259931451460577; NN__hidden_layer_sizes : 24;<br>NN__max_iter : 434; NN__random_state : 0;<br>NN__solver : adam                                       | 0.679793 | 0.700111 |
| NN  | MM | ROS    | NN__activation : identity; NN__alpha :<br>0.009117434544910765; NN__hidden_layer_sizes : 30;<br>NN__max_iter : 500; NN__random_state : 0;<br>NN__solver : adam                                    | 0.679773 | 0.698129 |
| NN  | SS | SMOTE  | NN__activation : relu; NN__alpha : 10.0;<br>NN__hidden_layer_sizes : 3; NN__max_iter : 50;<br>NN__random_state : 0; NN__solver : lbfgs                                                            | 0.679766 | 0.704621 |
| NN  | MM | ADASYN | NN__activation : logistic; NN__alpha :<br>0.000126477357080222; NN__hidden_layer_sizes : 15;<br>NN__max_iter : 500; NN__random_state : 0;<br>NN__solver : adam                                    | 0.679344 | 0.694501 |
| XGB | SS | ROS    | XGB__colsample_bytree : 0.1; XGB__gamma : 0.01;<br>XGB__max_depth : 1; XGB__min_child_weight : 0.0;<br>XGB__random_state : 0; XGB__scale_pos_weight :<br>1.5754883765595538; XGB__subsample : 0.9 | 0.679319 | 0.784787 |
| XGB | SS | ROS    | XGB__colsample_bytree : 0.1; XGB__gamma : 0.01;<br>XGB__max_depth : 1; XGB__min_child_weight : 0.0;<br>XGB__random_state : 0; XGB__scale_pos_weight : 5.0;<br>XGB__subsample : 0.9                | 0.679254 | 0.785042 |



|     |    |        |                                                                                                                                                                                                                    |          |          |
|-----|----|--------|--------------------------------------------------------------------------------------------------------------------------------------------------------------------------------------------------------------------|----------|----------|
| XGB | MM | ADASYN | XGB__colsample_bytree : 1.0; XGB__gamma :<br>2.9461063871502726; XGB__max_depth : 2;<br>XGB__min_child_weight : 0.0; XGB__random_state :<br>0; XGB__scale_pos_weight : 0.5; XGB__subsample :<br>0.9                | 0.679135 | 0.792225 |
| NN  | SS | SMOTE  | NN__activation : identity; NN__alpha : 10.0;<br>NN__hidden_layer_sizes : 3; NN__max_iter : 500;<br>NN__random_state : 0; NN__solver : lbfgs                                                                        | 0.679052 | 0.703677 |
| NN  | MM | ROS    | NN__activation : logistic; NN__alpha : 0.0001;<br>NN__hidden_layer_sizes : 40; NN__max_iter : 500;<br>NN__random_state : 0; NN__solver : adam                                                                      | 0.67895  | 0.692553 |
| NN  | MM | ROS    | NN__activation : relu; NN__alpha :<br>0.07874106728803539; NN__hidden_layer_sizes : 24;<br>NN__max_iter : 500; NN__random_state : 0;<br>NN__solver : adam                                                          | 0.678942 | 0.7182   |
| XGB | MM | ADASYN | XGB__colsample_bytree : 1.0; XGB__gamma :<br>4.115447640089052; XGB__max_depth : 1;<br>XGB__min_child_weight : 0.0; XGB__random_state :<br>0; XGB__scale_pos_weight : 0.5; XGB__subsample :<br>0.9                 | 0.678862 | 0.748522 |
| NN  | SS | SMOTE  | NN__activation : tanh; NN__alpha :<br>0.0008219253949873161; NN__hidden_layer_sizes : 50;<br>NN__max_iter : 50; NN__random_state : 0;<br>NN__solver : adam                                                         | 0.678568 | 0.708027 |
| XGB | SS | ROS    | XGB__colsample_bytree : 0.1; XGB__gamma : 0.01;<br>XGB__max_depth : 1; XGB__min_child_weight : 0.0;<br>XGB__random_state : 0; XGB__scale_pos_weight :<br>4.267710064533322; XGB__subsample :<br>0.6793920884966658 | 0.678484 | 0.782205 |

|     |    |        |                                                                                                                                                                                                                                                   |          |          |
|-----|----|--------|---------------------------------------------------------------------------------------------------------------------------------------------------------------------------------------------------------------------------------------------------|----------|----------|
| NN  | SS | SMOTE  | NN__activation : identity; NN__alpha : 10.0;<br>NN__hidden_layer_sizes : 50; NN__max_iter : 50;<br>NN__random_state : 0; NN__solver : lbfgs                                                                                                       | 0.678294 | 0.703668 |
| XGB | MM | ROS    | XGB__colsample_bytree : 0.1; XGB__gamma :<br>11.78700499760513; XGB__max_depth : 1;<br>XGB__min_child_weight : 10.423163741144396;<br>XGB__random_state : 0; XGB__scale_pos_weight :<br>4.343460292055702; XGB__subsample :<br>0.7840051242138955 | 0.67824  | 0.735535 |
| NN  | MM | ADASYN | NN__activation : logistic; NN__alpha :<br>0.36185798550473247; NN__hidden_layer_sizes : 30;<br>NN__max_iter : 500; NN__random_state : 0;<br>NN__solver : lbfgs                                                                                    | 0.678088 | 0.707209 |
| XGB | MM | ROS    | XGB__colsample_bytree : 1.0; XGB__gamma :<br>18.571241977413063; XGB__max_depth : 1;<br>XGB__min_child_weight : 10.863276176061525;<br>XGB__random_state : 0; XGB__scale_pos_weight :<br>4.07032376883234; XGB__subsample : 0.9                   | 0.678063 | 0.72776  |
| XGB | MM | ADASYN | XGB__colsample_bytree : 0.1; XGB__gamma : 0.01;<br>XGB__max_depth : 1; XGB__min_child_weight : 0.0;<br>XGB__random_state : 0; XGB__scale_pos_weight :<br>2.146007328437145; XGB__subsample : 0.5                                                  | 0.678002 | 0.767306 |
| NN  | MM | ADASYN | NN__activation : identity; NN__alpha :<br>4.548287284206085; NN__hidden_layer_sizes : 30;<br>NN__max_iter : 500; NN__random_state : 0;<br>NN__solver : lbfgs                                                                                      | 0.677968 | 0.70068  |
| NN  | SS | SMOTE  | NN__activation : tanh; NN__alpha : 10.0;<br>NN__hidden_layer_sizes : 3; NN__max_iter : 500;<br>NN__random_state : 0; NN__solver : adam                                                                                                            | 0.677901 | 0.706392 |
| XGB | SS | ROS    | XGB__colsample_bytree : 0.1; XGB__gamma : 0.01;<br>XGB__max_depth : 1; XGB__min_child_weight : 0.0;                                                                                                                                               | 0.677732 | 0.779141 |

|     |    |        |                                                                                                                                                                                                                                                     |          |          |
|-----|----|--------|-----------------------------------------------------------------------------------------------------------------------------------------------------------------------------------------------------------------------------------------------------|----------|----------|
|     |    |        | XGB__random_state : 0; XGB__scale_pos_weight : 0.5;<br>XGB__subsample : 0.7087165941778301                                                                                                                                                          |          |          |
| NN  | MM | ROS    | NN__activation : tanh; NN__alpha :<br>0.17129999616900296; NN__hidden_layer_sizes : 25;<br>NN__max_iter : 500; NN__random_state : 0;<br>NN__solver : adam                                                                                           | 0.67762  | 0.698219 |
| NN  | SS | SMOTE  | NN__activation : identity; NN__alpha :<br>0.28534423108597284; NN__hidden_layer_sizes : 3;<br>NN__max_iter : 50; NN__random_state : 0;<br>NN__solver : lbfgs                                                                                        | 0.677468 | 0.703823 |
| NN  | MM | ROS    | NN__activation : tanh; NN__alpha : 0.0001;<br>NN__hidden_layer_sizes : 22; NN__max_iter : 500;<br>NN__random_state : 0; NN__solver : adam                                                                                                           | 0.677328 | 0.698248 |
| NN  | MM | ADASYN | NN__activation : tanh; NN__alpha :<br>3.800332467979972; NN__hidden_layer_sizes : 50;<br>NN__max_iter : 470; NN__random_state : 0;<br>NN__solver : lbfgs                                                                                            | 0.677312 | 0.702124 |
| XGB | MM | ROS    | XGB__colsample_bytree : 1.0; XGB__gamma : 0.01;<br>XGB__max_depth : 8; XGB__min_child_weight : 50.0;<br>XGB__random_state : 0; XGB__scale_pos_weight : 5.0;<br>XGB__subsample : 0.8336733407808952                                                  | 0.677255 | 0.71603  |
| XGB | MM | ROS    | XGB__colsample_bytree : 1.0; XGB__gamma :<br>12.798674701129748; XGB__max_depth : 1;<br>XGB__min_child_weight : 1.9168720632159062;<br>XGB__random_state : 0; XGB__scale_pos_weight :<br>4.5293176600106415; XGB__subsample :<br>0.8279458585317834 | 0.676837 | 0.744884 |
| NN  | SS | SMOTE  | NN__activation : identity; NN__alpha :<br>1.2278635248432284; NN__hidden_layer_sizes : 27;<br>NN__max_iter : 165; NN__random_state : 0;<br>NN__solver : adam                                                                                        | 0.67671  | 0.703396 |

|     |    |       |                                                                                                                                                                                                                   |          |          |
|-----|----|-------|-------------------------------------------------------------------------------------------------------------------------------------------------------------------------------------------------------------------|----------|----------|
| NN  | SS | SMOTE | NN__activation : identity; NN__alpha :<br>0.42310533834131386; NN__hidden_layer_sizes : 50;<br>NN__max_iter : 50; NN__random_state : 0;<br>NN__solver : lbfgs                                                     | 0.676676 | 0.70379  |
| NN  | SS | SMOTE | NN__activation : identity; NN__alpha :<br>0.00011158207754410737; NN__hidden_layer_sizes : 3;<br>NN__max_iter : 165; NN__random_state : 0;<br>NN__solver : adam                                                   | 0.676641 | 0.693495 |
| XGB | MM | ROS   | XGB__colsample_bytree : 1.0; XGB__gamma : 0.01;<br>XGB__max_depth : 1; XGB__min_child_weight : 50.0;<br>XGB__random_state : 0; XGB__scale_pos_weight :<br>3.3767277508006277; XGB__subsample : 0.9                | 0.676483 | 0.70437  |
| NN  | SS | SMOTE | NN__activation : identity; NN__alpha :<br>0.0025231362554514265; NN__hidden_layer_sizes : 3;<br>NN__max_iter : 50; NN__random_state : 0;<br>NN__solver : lbfgs                                                    | 0.676297 | 0.703886 |
| NN  | MM | ROS   | NN__activation : tanh; NN__alpha :<br>0.3184983766348907; NN__hidden_layer_sizes : 35;<br>NN__max_iter : 237; NN__random_state : 0;<br>NN__solver : adam                                                          | 0.676292 | 0.698286 |
| NN  | MM | ROS   | NN__activation : tanh; NN__alpha :<br>0.009079456243786288; NN__hidden_layer_sizes : 30;<br>NN__max_iter : 500; NN__random_state : 0;<br>NN__solver : adam                                                        | 0.676276 | 0.698584 |
| XGB | SS | ROS   | XGB__colsample_bytree : 0.1; XGB__gamma :<br>6.693041360995059; XGB__max_depth : 1;<br>XGB__min_child_weight : 0.0; XGB__random_state :<br>0; XGB__scale_pos_weight : 2.7080598523485593;<br>XGB__subsample : 0.5 | 0.67618  | 0.755519 |
| XGB | SS | ROS   | XGB__colsample_bytree : 1.0; XGB__gamma :<br>16.224461980171178; XGB__max_depth : 1;                                                                                                                              | 0.676097 | 0.736449 |

|     |    |        |                                                                                                                                                                                                                   |          |          |
|-----|----|--------|-------------------------------------------------------------------------------------------------------------------------------------------------------------------------------------------------------------------|----------|----------|
|     |    |        | XGB__min_child_weight : 0.0; XGB__random_state :<br>0; XGB__scale_pos_weight : 4.452545569234384;<br>XGB__subsample : 0.5                                                                                         |          |          |
| XGB | MM | ADASYN | XGB__colsample_bytree : 1.0; XGB__gamma :<br>3.944544252994107; XGB__max_depth : 1;<br>XGB__min_child_weight : 0.0; XGB__random_state :<br>0; XGB__scale_pos_weight : 0.5; XGB__subsample :<br>0.5                | 0.676006 | 0.760928 |
| NN  | MM | SMOTE  | NN__activation : identity; NN__alpha : 0.0001;<br>NN__hidden_layer_sizes : 35; NN__max_iter : 253;<br>NN__random_state : 0; NN__solver : lbfgs                                                                    | 0.675953 | 0.703532 |
| XGB | SS | ROS    | XGB__colsample_bytree : 0.1; XGB__gamma : 0.01;<br>XGB__max_depth : 2; XGB__min_child_weight :<br>32.99293216572262; XGB__random_state : 0;<br>XGB__scale_pos_weight : 5.0; XGB__subsample : 0.5                  | 0.675891 | 0.69789  |
| XGB | MM | ROS    | XGB__colsample_bytree : 1.0; XGB__gamma :<br>14.16520226699194; XGB__max_depth : 5;<br>XGB__min_child_weight : 0.0; XGB__random_state :<br>0; XGB__scale_pos_weight : 5.0; XGB__subsample :<br>0.7083605219364747 | 0.675755 | 0.837673 |
| NN  | MM | ROS    | NN__activation : tanh; NN__alpha :<br>9.681467416121485; NN__hidden_layer_sizes : 25;<br>NN__max_iter : 304; NN__random_state : 0;<br>NN__solver : lbfgs                                                          | 0.675595 | 0.683046 |
| NN  | MM | ROS    | NN__activation : tanh; NN__alpha :<br>9.860917988825792; NN__hidden_layer_sizes : 50;<br>NN__max_iter : 311; NN__random_state : 0;<br>NN__solver : lbfgs                                                          | 0.675579 | 0.682809 |
| XGB | SS | ROS    | XGB__colsample_bytree : 1.0; XGB__gamma :<br>12.37581754675186; XGB__max_depth : 1;<br>XGB__min_child_weight : 0.0; XGB__random_state :                                                                           | 0.675289 | 0.747802 |

|     |    |        |                                                                                                                                                                                                                            |          |          |
|-----|----|--------|----------------------------------------------------------------------------------------------------------------------------------------------------------------------------------------------------------------------------|----------|----------|
|     |    |        | 0; XGB__scale_pos_weight : 5.0; XGB__subsample : 0.9                                                                                                                                                                       |          |          |
| NN  | MM | ROS    | NN__activation : relu; NN__alpha : 10.0;<br>NN__hidden_layer_sizes : 50; NN__max_iter : 133;<br>NN__random_state : 0; NN__solver : lbfgs                                                                                   | 0.675182 | 0.682593 |
| NN  | MM | SMOTE  | NN__activation : identity; NN__alpha : 0.0001;<br>NN__hidden_layer_sizes : 15; NN__max_iter : 192;<br>NN__random_state : 0; NN__solver : lbfgs                                                                             | 0.675161 | 0.703525 |
| NN  | MM | ROS    | NN__activation : relu; NN__alpha : 10.0;<br>NN__hidden_layer_sizes : 30; NN__max_iter : 229;<br>NN__random_state : 0; NN__solver : lbfgs                                                                                   | 0.675113 | 0.683062 |
| NN  | SS | SMOTE  | NN__activation : tanh; NN__alpha : 0.0001;<br>NN__hidden_layer_sizes : 7; NN__max_iter : 463;<br>NN__random_state : 0; NN__solver : adam                                                                                   | 0.675108 | 0.709278 |
| XGB | MM | ROS    | XGB__colsample_bytree : 1.0; XGB__gamma : 26.227304370768316; XGB__max_depth : 8;<br>XGB__min_child_weight : 0.0; XGB__random_state : 0; XGB__scale_pos_weight : 4.184661234690365;<br>XGB__subsample : 0.6286807682625302 | 0.674934 | 0.766198 |
| XGB | MM | ADASYN | XGB__colsample_bytree : 0.1; XGB__gamma : 0.01;<br>XGB__max_depth : 1; XGB__min_child_weight : 0.0;<br>XGB__random_state : 0; XGB__scale_pos_weight : 0.5;<br>XGB__subsample : 0.5                                         | 0.674908 | 0.766469 |
| NN  | MM | ROS    | NN__activation : identity; NN__alpha : 1.2278635248432284; NN__hidden_layer_sizes : 27;<br>NN__max_iter : 165; NN__random_state : 0;<br>NN__solver : adam                                                                  | 0.674884 | 0.690522 |
| NN  | MM | SMOTE  | NN__activation : identity; NN__alpha : 0.0010098554274638714; NN__hidden_layer_sizes : 3;<br>NN__max_iter : 50; NN__random_state : 0;<br>NN__solver : lbfgs                                                                | 0.674782 | 0.70351  |

|     |    |        |                                                                                                                                                                                    |          |          |
|-----|----|--------|------------------------------------------------------------------------------------------------------------------------------------------------------------------------------------|----------|----------|
| NN  | MM | ROS    | NN__activation : tanh; NN__alpha : 10.0;<br>NN__hidden_layer_sizes : 9; NN__max_iter : 322;<br>NN__random_state : 0; NN__solver : lbfgs                                            | 0.674769 | 0.68255  |
| NN  | MM | SMOTE  | NN__activation : identity; NN__alpha :<br>0.24292043584111792; NN__hidden_layer_sizes : 50;<br>NN__max_iter : 417; NN__random_state : 0;<br>NN__solver : lbfgs                     | 0.674747 | 0.703432 |
| NN  | MM | SMOTE  | NN__activation : identity; NN__alpha : 0.0001;<br>NN__hidden_layer_sizes : 50; NN__max_iter : 363;<br>NN__random_state : 0; NN__solver : lbfgs                                     | 0.674403 | 0.703587 |
| NN  | MM | SMOTE  | NN__activation : identity; NN__alpha :<br>0.6926685392029206; NN__hidden_layer_sizes : 50;<br>NN__max_iter : 310; NN__random_state : 0;<br>NN__solver : lbfgs                      | 0.674403 | 0.70353  |
| NN  | MM | ROS    | NN__activation : identity; NN__alpha : 10.0;<br>NN__hidden_layer_sizes : 50; NN__max_iter : 50;<br>NN__random_state : 0; NN__solver : lbfgs                                        | 0.67439  | 0.682385 |
| NN  | MM | SMOTE  | NN__activation : identity; NN__alpha :<br>0.08251180234141221; NN__hidden_layer_sizes : 8;<br>NN__max_iter : 349; NN__random_state : 0;<br>NN__solver : lbfgs                      | 0.674369 | 0.703544 |
| NN  | MM | ROS    | NN__activation : tanh; NN__alpha : 10.0;<br>NN__hidden_layer_sizes : 35; NN__max_iter : 50;<br>NN__random_state : 0; NN__solver : lbfgs                                            | 0.674356 | 0.682472 |
| XGB | MM | ADASYN | XGB__colsample_bytree : 0.1; XGB__gamma : 0.01;<br>XGB__max_depth : 1; XGB__min_child_weight : 0.0;<br>XGB__random_state : 0; XGB__scale_pos_weight : 0.5;<br>XGB__subsample : 0.9 | 0.674064 | 0.773944 |
| XGB | MM | ROS    | XGB__colsample_bytree : 0.977542367912643;<br>XGB__gamma : 0.01; XGB__max_depth : 5;<br>XGB__min_child_weight : 42.84753342717848;                                                 | 0.674018 | 0.719112 |

|     |    |        |                                                                                                                                                                                                                               |          |          |
|-----|----|--------|-------------------------------------------------------------------------------------------------------------------------------------------------------------------------------------------------------------------------------|----------|----------|
|     |    |        | XGB__random_state : 0; XGB__scale_pos_weight :<br>4.246001826810197; XGB__subsample :<br>0.7759245107451025                                                                                                                   |          |          |
| NN  | MM | SMOTE  | NN__activation : identity; NN__alpha :<br>0.0008112873099284723; NN__hidden_layer_sizes : 30;<br>NN__max_iter : 270; NN__random_state : 0;<br>NN__solver : lbfgs                                                              | 0.67399  | 0.703625 |
| XGB | MM | ADASYN | XGB__colsample_bytree : 0.656043020699853;<br>XGB__gamma : 4.422609650361867;<br>XGB__max_depth : 1; XGB__min_child_weight : 0.0;<br>XGB__random_state : 0; XGB__scale_pos_weight :<br>1.25910817089834; XGB__subsample : 0.9 | 0.673682 | 0.760474 |
| XGB | MM | ROS    | XGB__colsample_bytree : 0.19586410089367562;<br>XGB__gamma : 0.01; XGB__max_depth : 8;<br>XGB__min_child_weight : 50.0; XGB__random_state :<br>0; XGB__scale_pos_weight : 2.9567241112383504;<br>XGB__subsample : 0.9         | 0.673517 | 0.696277 |
| XGB | MM | ADASYN | XGB__colsample_bytree : 0.5502867522567378;<br>XGB__gamma : 0.01; XGB__max_depth : 1;<br>XGB__min_child_weight : 0.0; XGB__random_state :<br>0; XGB__scale_pos_weight : 0.5; XGB__subsample :<br>0.9                          | 0.673444 | 0.776363 |
| XGB | SS | ROS    | XGB__colsample_bytree : 0.2528104392554187;<br>XGB__gamma : 0.01; XGB__max_depth : 2;<br>XGB__min_child_weight : 0.0; XGB__random_state :<br>0; XGB__scale_pos_weight : 2.660506520436399;<br>XGB__subsample : 0.5            | 0.673193 | 0.801765 |
| NN  | MM | SMOTE  | NN__activation : identity; NN__alpha :<br>1.7914584450333455; NN__hidden_layer_sizes : 5;<br>NN__max_iter : 500; NN__random_state : 0;<br>NN__solver : lbfgs                                                                  | 0.673077 | 0.703008 |



|     |    |        |                                                                                                                                                                                                                     |          |          |
|-----|----|--------|---------------------------------------------------------------------------------------------------------------------------------------------------------------------------------------------------------------------|----------|----------|
| XGB | MM | ADASYN | XGB__colsample_bytree : 0.1; XGB__gamma : 0.01;<br>XGB__max_depth : 1; XGB__min_child_weight : 0.0;<br>XGB__random_state : 0; XGB__scale_pos_weight :<br>3.0451191007968426; XGB__subsample : 0.5                   | 0.672903 | 0.767275 |
| XGB | SS | ROS    | XGB__colsample_bytree : 0.1; XGB__gamma : 0.01;<br>XGB__max_depth : 8; XGB__min_child_weight :<br>24.595248366811877; XGB__random_state : 0;<br>XGB__scale_pos_weight : 1.3841357752604413;<br>XGB__subsample : 0.5 | 0.672884 | 0.674677 |
| NN  | MM | SMOTE  | NN__activation : identity; NN__alpha :<br>1.765456809010971; NN__hidden_layer_sizes : 50;<br>NN__max_iter : 254; NN__random_state : 0;<br>NN__solver : lbfgs                                                        | 0.672663 | 0.702987 |
| XGB | MM | ROS    | XGB__colsample_bytree : 0.1; XGB__gamma : 0.01;<br>XGB__max_depth : 8; XGB__min_child_weight :<br>37.16045353144856; XGB__random_state : 0;<br>XGB__scale_pos_weight : 5.0; XGB__subsample :<br>0.632693392817871   | 0.672627 | 0.705128 |
| XGB | MM | ADASYN | XGB__colsample_bytree : 1.0; XGB__gamma :<br>4.412403807080667; XGB__max_depth : 1;<br>XGB__min_child_weight : 0.0; XGB__random_state :<br>0; XGB__scale_pos_weight : 0.5; XGB__subsample :<br>0.9                  | 0.672544 | 0.746808 |
| NN  | MM | ADASYN | NN__activation : relu; NN__alpha :<br>2.7354342694498306; NN__hidden_layer_sizes : 50;<br>NN__max_iter : 229; NN__random_state : 0;<br>NN__solver : lbfgs                                                           | 0.672399 | 0.715191 |
| XGB | MM | ROS    | XGB__colsample_bytree : 0.1; XGB__gamma : 0.01;<br>XGB__max_depth : 8; XGB__min_child_weight : 50.0;<br>XGB__random_state : 0; XGB__scale_pos_weight :<br>3.448386126656192; XGB__subsample : 0.9                   | 0.672285 | 0.702211 |

|     |    |        |                                                                                                                                                                                                                     |          |          |
|-----|----|--------|---------------------------------------------------------------------------------------------------------------------------------------------------------------------------------------------------------------------|----------|----------|
| XGB | MM | ROS    | XGB__colsample_bytree : 1.0; XGB__gamma : 0.01;<br>XGB__max_depth : 8; XGB__min_child_weight : 50.0;<br>XGB__random_state : 0; XGB__scale_pos_weight :<br>4.449305626418177; XGB__subsample : 0.9                   | 0.671887 | 0.719422 |
| XGB | MM | ROS    | XGB__colsample_bytree : 1.0; XGB__gamma : 0.01;<br>XGB__max_depth : 3; XGB__min_child_weight : 50.0;<br>XGB__random_state : 0; XGB__scale_pos_weight :<br>4.542984599714905; XGB__subsample : 0.9                   | 0.671818 | 0.719818 |
| XGB | MM | ROS    | XGB__colsample_bytree : 1.0; XGB__gamma : 0.01;<br>XGB__max_depth : 8; XGB__min_child_weight : 50.0;<br>XGB__random_state : 0; XGB__scale_pos_weight :<br>4.382539245399; XGB__subsample : 0.9                      | 0.671508 | 0.718997 |
| NN  | MM | SMOTE  | NN__activation : relu; NN__alpha :<br>2.0532223750546117; NN__hidden_layer_sizes : 3;<br>NN__max_iter : 50; NN__random_state : 0;<br>NN__solver : lbfgs                                                             | 0.671474 | 0.703429 |
| NN  | MM | SMOTE  | NN__activation : tanh; NN__alpha :<br>1.2688048350010857; NN__hidden_layer_sizes : 20;<br>NN__max_iter : 232; NN__random_state : 0;<br>NN__solver : lbfgs                                                           | 0.671179 | 0.71356  |
| XGB | MM | ADASYN | XGB__colsample_bytree : 0.5949006479896596;<br>XGB__gamma : 0.01; XGB__max_depth : 1;<br>XGB__min_child_weight : 0.0; XGB__random_state :<br>0; XGB__scale_pos_weight : 1.8166923233341714;<br>XGB__subsample : 0.9 | 0.67112  | 0.781039 |
| NN  | MM | SMOTE  | NN__activation : relu; NN__alpha :<br>0.001160161703428094; NN__hidden_layer_sizes : 27;<br>NN__max_iter : 483; NN__random_state : 0;<br>NN__solver : adam                                                          | 0.671087 | 0.71523  |

|     |    |        |                                                                                                                                                                                                                                   |          |          |
|-----|----|--------|-----------------------------------------------------------------------------------------------------------------------------------------------------------------------------------------------------------------------------------|----------|----------|
| NN  | MM | SMOTE  | NN__activation : logistic; NN__alpha : 0.0001;<br>NN__hidden_layer_sizes : 50; NN__max_iter : 362;<br>NN__random_state : 0; NN__solver : adam                                                                                     | 0.671045 | 0.696511 |
| XGB | MM | ADASYN | XGB__colsample_bytree : 0.6558242728770811;<br>XGB__gamma : 0.01; XGB__max_depth : 1;<br>XGB__min_child_weight : 0.0; XGB__random_state :<br>0; XGB__scale_pos_weight : 1.709460839167244;<br>XGB__subsample : 0.5                | 0.671033 | 0.777726 |
| XGB | MM | ROS    | XGB__colsample_bytree : 1.0; XGB__gamma : 0.01;<br>XGB__max_depth : 8; XGB__min_child_weight : 50.0;<br>XGB__random_state : 0; XGB__scale_pos_weight : 5.0;<br>XGB__subsample : 0.9                                               | 0.670905 | 0.72315  |
| XGB | MM | ADASYN | XGB__colsample_bytree : 1.0; XGB__gamma : 0.01;<br>XGB__max_depth : 1; XGB__min_child_weight : 0.0;<br>XGB__random_state : 0; XGB__scale_pos_weight : 0.5;<br>XGB__subsample : 0.9                                                | 0.670807 | 0.77777  |
| XGB | MM | ROS    | XGB__colsample_bytree : 1.0; XGB__gamma : 0.01;<br>XGB__max_depth : 8; XGB__min_child_weight :<br>45.48985994195283; XGB__random_state : 0;<br>XGB__scale_pos_weight : 3.2999249694761894;<br>XGB__subsample : 0.8140835049941484 | 0.670732 | 0.706964 |
| NN  | MM | SMOTE  | NN__activation : logistic; NN__alpha : 0.0001;<br>NN__hidden_layer_sizes : 25; NN__max_iter : 500;<br>NN__random_state : 0; NN__solver : adam                                                                                     | 0.670702 | 0.693815 |
| XGB | MM | ROS    | XGB__colsample_bytree : 1.0; XGB__gamma :<br>15.671258767745782; XGB__max_depth : 1;<br>XGB__min_child_weight : 0.0; XGB__random_state :<br>0; XGB__scale_pos_weight : 3.391506876320594;<br>XGB__subsample : 0.6659907592909782  | 0.670603 | 0.739969 |
| XGB | MM | ROS    | XGB__colsample_bytree : 1.0; XGB__gamma : 0.01;<br>XGB__max_depth : 8; XGB__min_child_weight : 50.0;                                                                                                                              | 0.670422 | 0.717701 |

|     |    |       |                                                                                                                                                                                                                                     |          |          |
|-----|----|-------|-------------------------------------------------------------------------------------------------------------------------------------------------------------------------------------------------------------------------------------|----------|----------|
|     |    |       | XGB__random_state : 0; XGB__scale_pos_weight :<br>4.016696892589927; XGB__subsample : 0.9                                                                                                                                           |          |          |
| XGB | SS | ROS   | XGB__colsample_bytree : 1.0; XGB__gamma : 0.01;<br>XGB__max_depth : 8; XGB__min_child_weight : 50.0;<br>XGB__random_state : 0; XGB__scale_pos_weight :<br>3.9880396450717157; XGB__subsample : 0.9                                  | 0.670355 | 0.717558 |
| NN  | MM | SMOTE | NN__activation : identity; NN__alpha :<br>7.08537176228385; NN__hidden_layer_sizes : 3;<br>NN__max_iter : 50; NN__random_state : 0;<br>NN__solver : lbfgs                                                                           | 0.670322 | 0.69514  |
| XGB | MM | ROS   | XGB__colsample_bytree : 0.1; XGB__gamma : 0.01;<br>XGB__max_depth : 8; XGB__min_child_weight :<br>39.810852518617864; XGB__random_state : 0;<br>XGB__scale_pos_weight : 3.6446632953934954;<br>XGB__subsample : 0.6653847072456476  | 0.670273 | 0.700436 |
| NN  | MM | SMOTE | NN__activation : tanh; NN__alpha : 10.0;<br>NN__hidden_layer_sizes : 15; NN__max_iter : 368;<br>NN__random_state : 0; NN__solver : adam                                                                                             | 0.670136 | 0.683722 |
| XGB | MM | ROS   | XGB__colsample_bytree : 0.1; XGB__gamma : 0.01;<br>XGB__max_depth : 1; XGB__min_child_weight :<br>34.88040223779923; XGB__random_state : 0;<br>XGB__scale_pos_weight : 4.140781589809216;<br>XGB__subsample : 0.592974525787412     | 0.670063 | 0.703647 |
| XGB | SS | ROS   | XGB__colsample_bytree : 0.47248573380119663;<br>XGB__gamma : 0.01; XGB__max_depth : 8;<br>XGB__min_child_weight : 17.689509660846095;<br>XGB__random_state : 0; XGB__scale_pos_weight : 0.5;<br>XGB__subsample : 0.7887925376076751 | 0.670039 | 0.704974 |
| XGB | MM | ROS   | XGB__colsample_bytree : 0.1; XGB__gamma : 0.01;<br>XGB__max_depth : 1; XGB__min_child_weight : 50.0;<br>XGB__random_state : 0; XGB__scale_pos_weight :                                                                              | 0.669868 | 0.695193 |

|     |    |        |                                                                                                                                                                                                                                   |          |          |
|-----|----|--------|-----------------------------------------------------------------------------------------------------------------------------------------------------------------------------------------------------------------------------------|----------|----------|
|     |    |        | 3.6354767291173093; XGB__subsample :<br>0.8084035061647417                                                                                                                                                                        |          |          |
| XGB | SS | ROS    | XGB__colsample_bytree : 0.1; XGB__gamma : 0.01;<br>XGB__max_depth : 8; XGB__min_child_weight :<br>24.87965371428194; XGB__random_state : 0;<br>XGB__scale_pos_weight : 1.9394145340674889;<br>XGB__subsample : 0.5001007667683355 | 0.669487 | 0.691502 |
| NN  | MM | SMOTE  | NN__activation : identity; NN__alpha : 0.0001;<br>NN__hidden_layer_sizes : 27; NN__max_iter : 289;<br>NN__random_state : 0; NN__solver : adam                                                                                     | 0.668615 | 0.701735 |
| XGB | MM | ADASYN | XGB__colsample_bytree : 1.0; XGB__gamma :<br>5.637148713191554; XGB__max_depth : 1;<br>XGB__min_child_weight : 0.0; XGB__random_state :<br>0; XGB__scale_pos_weight : 1.5251673265043093;<br>XGB__subsample : 0.9                 | 0.668577 | 0.760341 |
| NN  | MM | SMOTE  | NN__activation : relu; NN__alpha :<br>0.11595947054071278; NN__hidden_layer_sizes : 25;<br>NN__max_iter : 390; NN__random_state : 0;<br>NN__solver : adam                                                                         | 0.66842  | 0.718557 |
| XGB | MM | ADASYN | XGB__colsample_bytree : 1.0; XGB__gamma :<br>5.724755061328439; XGB__max_depth : 1;<br>XGB__min_child_weight : 0.0; XGB__random_state :<br>0; XGB__scale_pos_weight : 1.5355620830927734;<br>XGB__subsample : 0.9                 | 0.668215 | 0.759417 |
| NN  | MM | SMOTE  | NN__activation : tanh; NN__alpha :<br>0.938467758201178; NN__hidden_layer_sizes : 25;<br>NN__max_iter : 357; NN__random_state : 0;<br>NN__solver : adam                                                                           | 0.66796  | 0.701301 |
| NN  | MM | ADASYN | NN__activation : logistic; NN__alpha :<br>2.2135773244197514; NN__hidden_layer_sizes : 50;                                                                                                                                        | 0.66745  | 0.690171 |

|    |    |        |                                                                                                                                                                  |          |          |
|----|----|--------|------------------------------------------------------------------------------------------------------------------------------------------------------------------|----------|----------|
|    |    |        | NN__max_iter : 452; NN__random_state : 0;<br>NN__solver : lbfgs                                                                                                  |          |          |
| NN | MM | SMOTE  | NN__activation : tanh; NN__alpha :<br>0.3184983766348907; NN__hidden_layer_sizes : 35;<br>NN__max_iter : 237; NN__random_state : 0;<br>NN__solver : adam         | 0.665548 | 0.702026 |
| NN | MM | SMOTE  | NN__activation : identity; NN__alpha :<br>0.024409645284325585; NN__hidden_layer_sizes : 35;<br>NN__max_iter : 233; NN__random_state : 0;<br>NN__solver : adam   | 0.664843 | 0.701853 |
| NN | MM | SMOTE  | NN__activation : tanh; NN__alpha :<br>0.03869204009250102; NN__hidden_layer_sizes : 25;<br>NN__max_iter : 450; NN__random_state : 0;<br>NN__solver : adam        | 0.664827 | 0.703958 |
| NN | MM | SMOTE  | NN__activation : identity; NN__alpha :<br>0.00017727138126991392; NN__hidden_layer_sizes :<br>25; NN__max_iter : 500; NN__random_state : 0;<br>NN__solver : adam | 0.664035 | 0.702059 |
| NN | MM | ADASYN | NN__activation : relu; NN__alpha : 10.0;<br>NN__hidden_layer_sizes : 50; NN__max_iter : 50;<br>NN__random_state : 0; NN__solver : lbfgs                          | 0.6638   | 0.687105 |
| NN | MM | SMOTE  | NN__activation : tanh; NN__alpha : 0.0001;<br>NN__hidden_layer_sizes : 30; NN__max_iter : 500;<br>NN__random_state : 0; NN__solver : adam                        | 0.66362  | 0.702466 |
| NN | MM | ADASYN | NN__activation : identity; NN__alpha : 10.0;<br>NN__hidden_layer_sizes : 24; NN__max_iter : 500;<br>NN__random_state : 0; NN__solver : lbfgs                     | 0.663422 | 0.687001 |
| NN | MM | SMOTE  | NN__activation : tanh; NN__alpha :<br>0.35567522781433475; NN__hidden_layer_sizes : 20;<br>NN__max_iter : 316; NN__random_state : 0;<br>NN__solver : adam        | 0.663276 | 0.701488 |

|    |    |        |                                                                                                                                                               |          |          |
|----|----|--------|---------------------------------------------------------------------------------------------------------------------------------------------------------------|----------|----------|
| NN | MM | ADASYN | NN__activation : relu; NN__alpha :<br>0.3471573597085078; NN__hidden_layer_sizes : 15;<br>NN__max_iter : 500; NN__random_state : 0;<br>NN__solver : adam      | 0.66322  | 0.711189 |
| NN | MM | SMOTE  | NN__activation : relu; NN__alpha :<br>3.9814946105106603; NN__hidden_layer_sizes : 15;<br>NN__max_iter : 427; NN__random_state : 0;<br>NN__solver : adam      | 0.66309  | 0.692602 |
| NN | MM | ADASYN | NN__activation : identity; NN__alpha : 10.0;<br>NN__hidden_layer_sizes : 8; NN__max_iter : 500;<br>NN__random_state : 0; NN__solver : lbfgs                   | 0.663043 | 0.686996 |
| NN | MM | SMOTE  | NN__activation : tanh; NN__alpha :<br>1.009315952517627; NN__hidden_layer_sizes : 15;<br>NN__max_iter : 50; NN__random_state : 0;<br>NN__solver : lbfgs       | 0.662944 | 0.714652 |
| NN | MM | SMOTE  | NN__activation : identity; NN__alpha :<br>0.23092602763971176; NN__hidden_layer_sizes : 25;<br>NN__max_iter : 325; NN__random_state : 0;<br>NN__solver : adam | 0.66283  | 0.701805 |
| NN | MM | SMOTE  | NN__activation : tanh; NN__alpha :<br>0.15101413680232648; NN__hidden_layer_sizes : 30;<br>NN__max_iter : 259; NN__random_state : 0;<br>NN__solver : adam     | 0.662741 | 0.701843 |
| NN | SS | ROS    | NN__activation : relu; NN__alpha :<br>0.7530466730222446; NN__hidden_layer_sizes : 9;<br>NN__max_iter : 443; NN__random_state : 0;<br>NN__solver : lbfgs      | 0.646437 | 0.827539 |
| NN | SS | ROS    | NN__activation : relu; NN__alpha :<br>0.0007233655252968397; NN__hidden_layer_sizes : 22;<br>NN__max_iter : 411; NN__random_state : 0;<br>NN__solver : adam   | 0.638897 | 0.759154 |

|    |    |     |                                                                                                                                                            |          |          |
|----|----|-----|------------------------------------------------------------------------------------------------------------------------------------------------------------|----------|----------|
| NN | SS | ROS | NN__activation : relu; NN__alpha : 0.0001;<br>NN__hidden_layer_sizes : 50; NN__max_iter : 50;<br>NN__random_state : 0; NN__solver : lbfgs                  | 0.629326 | 0.929607 |
| NN | SS | ROS | NN__activation : relu; NN__alpha :<br>0.01549337141764052; NN__hidden_layer_sizes : 20;<br>NN__max_iter : 372; NN__random_state : 0;<br>NN__solver : lbfgs | 0.608999 | 0.9688   |
